# Supplementary material for: Identification and Validation of T Cell Exhaustion Signature for Predicting Prognosis and Immune Response in Pancreatic Cancer by Integrated Analysis of Single-Cell and Bulk RNA Sequencing Data
Source: Preprints.org preprint supplement (doi:10.20944/preprints202402.0281.v1), 2024-02-06
Supplement: Supplementary file 1 [file supplementary]

## Sheet: Description
Table name	Title	Note
Table S1	DEGs between tumor and normal from TCGA-GTEX dataset using DEseq2, edgeR, and limma R packages	|log2FC|>2 and adjusted P-value<0.05
Table S2	Univariate Cox analysis of overall survival (OS) using Differentially expressed genes from TCGA-GTEx dataset	P-value<0.05
Table S3	Kaplan-Meier analysis using Differentially expressed genes from TCGA-GTEx dataset	log_rank_P-value<0.05
Table S4	CD8Tex genes from PAAD_CRA001160 scRNA-seq dataset	|log2FC|>0.3 and adjusted P-value<0.05
Table S5	TEX-related DEGs
Table S6	Significantly different GSVA-KEGG Pathways between high- and low-risk TCGA-PAAD patients	|log2FC|>0.1 and P-value<0.05

## Sheet: Table S1
Gene	DESeq2						edgeR					limma
	baseMean	log2FoldChange	lfcSE	stat	pvalue	padj	logFC	logCPM	LR	PValue	FDR	logFC	AveExpr	t	P.Value	adj.P.Val	B
KLK10	1737.58	6.93993	0.183588	37.8016	0	0	6.2877	5.45692	626.522	2.85318e-138	1.02233e-136	6.32959	1.83481	17.2277	1.08148e-48	5.94122e-48	99.8924
FOXL1	457.996	6.30836	0.157166	40.1382	0	0	5.52276	3.56531	631.251	2.67184e-139	9.858e-138	6.07952	0.58449	25.0649	2.41545e-80	5.48246e-79	172.581
KLK7	932.482	8.41774	0.223114	37.7284	0	0	6.81898	4.57232	436.271	7.01436e-97	8.74804e-96	6.77525	-0.0692944	13.9874	1.1273e-35	3.99086e-35	70.1049
S100A6	39225.1	5.07912	0.12389	40.997	0	0	5.06266	9.92891	1152.95	1.02651e-252	1.06205e-249	5.62229	8.20986	40.1801	1.09535e-133	2.71985e-130	295.142
TNS4	1483.96	7.74869	0.189949	40.7934	0	0	7.21049	5.2343	741.357	3.03947e-163	2.19399e-161	6.89986	1.1897	17.2925	5.89004e-49	3.26245e-48	100.526
TSPAN1	4533.42	5.73067	0.127554	44.9273	0	0	5.74317	6.84369	1345.41	1.53109e-294	6.3364e-291	5.343	4.41799	34.5449	3.16588e-115	9.14093e-113	252.714
MISP	2307.62	6.09431	0.153609	39.6741	0	0	6.07323	5.854	1031.87	2.12298e-226	9.58466e-224	6.38169	2.97716	36.6331	2.91719e-122	2.1617e-119	268.815
SERPINB5	906.943	7.40548	0.176584	41.9375	0	0	6.7778	4.54537	748.132	1.02235e-164	7.71611e-163	7.03115	0.851916	19.067	3.30096e-56	2.42575e-55	117.179
CEACAM6	19825.3	6.88341	0.16772	41.041	0	0	6.39132	8.98614	737.126	2.52758e-162	1.74825e-160	6.81661	5.76537	25.7621	4.58042e-83	1.21384e-81	178.779
C19orf33	2302.69	6.38608	0.16132	39.5863	0	0	6.34952	5.83398	1010.8	8.08699e-222	3.18743e-219	6.04039	2.76248	24.0094	3.50266e-76	6.28883e-75	163.004
MBOAT2	1185.07	3.54258	0.0940323	37.6741	0	0	3.56281	4.91767	1136.46	3.92602e-249	3.48168e-246	3.17647	3.71868	32.9264	1.30521e-109	2.33164e-107	239.8
AOC1	1545.03	7.16084	0.1789	40.0269	0	0	6.82037	5.27342	817.783	7.34046e-180	8.28504e-178	7.05109	1.62554	25.365	1.61581e-81	3.92202e-80	175.277
SFN	2411.42	6.2353	0.157894	39.4905	0	0	5.83239	5.91749	778.127	3.07386e-171	2.69707e-169	5.85351	2.94642	21.7637	3.47323e-67	4.0471e-66	142.323
CORO2A	1014.58	4.96633	0.122427	40.5657	0	0	4.97927	4.7024	1177.56	4.58482e-258	5.99187e-255	4.86361	2.65437	32.0541	1.58782e-106	2.25298e-104	232.713
NQO1	3843.84	4.79961	0.116141	41.3258	0	0	4.80986	6.59799	1253.02	1.83152e-274	3.24846e-271	4.3852	4.69793	34.2437	3.42492e-114	8.59033e-112	250.335
CEACAM5	13645	9.60778	0.254105	37.8103	0	0	7.43535	8.43208	358.362	6.401e-80	5.32473e-79	9.48197	2.50248	18.7472	6.7055e-55	4.64836e-54	114.18
COL17A1	4125.77	8.09814	0.190147	42.5887	0	0	7.28247	6.72161	682.268	2.1461e-150	1.07656e-148	7.32646	2.43503	20.2295	5.90525e-61	5.30895e-60	128.051
CAMK2N1	2448.28	3.35431	0.0895803	37.4448	7.30338e-307	4.77237e-304	3.3697	5.95697	1134.18	1.23014e-248	1.0533e-245	3.12072	4.85337	38.9865	6.48406e-130	1.00629e-126	286.487
CEACAM1	1269.02	4.12384	0.110274	37.3964	4.46603e-306	2.84348e-303	4.13552	5.00938	1090.92	3.10839e-239	2.14401e-236	3.63157	3.45641	29.2704	2.10671e-96	1.34824e-94	209.436
AFAP1-AS1	583.891	6.72506	0.180421	37.2742	4.29836e-304	2.66831e-301	6.70522	3.89617	874.357	3.68453e-192	5.82743e-190	5.7037	0.508492	15.3397	4.78067e-41	2.02195e-40	82.3853
STYK1	176.267	5.42943	0.146617	37.0312	3.60059e-300	2.07922e-297	5.37869	2.18705	995.44	1.75969e-218	6.06875e-216	5.38708	-0.249752	24.6152	1.41254e-78	2.89875e-77	168.525
GABRP	2655.25	7.309	0.198045	36.9058	3.73071e-298	2.10539e-295	6.27992	6.09947	497.385	3.5239e-110	5.95252e-109	6.07175	2.06845	15.3859	3.11974e-41	1.32784e-40	82.758
PLAC8	743.14	5.51305	0.149469	36.8842	8.28704e-298	4.57279e-295	4.9871	4.25562	638.048	8.87902e-141	3.40765e-139	5.09987	1.70206	23.7907	2.58608e-75	4.47179e-74	161.019
TMEM45B	730.743	4.59515	0.125419	36.6384	7.01013e-294	3.70359e-291	4.59722	4.21986	1002.94	4.13085e-220	1.53094e-217	4.11267	2.32694	22.0642	2.12369e-68	2.61704e-67	145.096
AHNAK2	3492.75	4.80444	0.131335	36.5817	5.59846e-293	2.89615e-290	4.83443	6.48678	959.379	1.21344e-210	3.63022e-208	4.16064	4.44035	24.3638	1.38582e-77	2.67376e-76	166.131
FHL2	2199.31	3.55221	0.0971378	36.5687	8.98397e-293	4.55267e-290	3.56565	5.79816	1087.64	1.60206e-238	1.02002e-235	3.27913	4.57273	34.2521	3.20527e-114	8.12144e-112	250.392
GJB3	678.099	6.05554	0.166204	36.4343	1.21804e-290	6.04904e-288	6.02505	4.10912	886.273	9.46053e-195	1.6201e-192	6.05436	1.13873	19.4543	8.62288e-58	6.7715e-57	120.796
HN1	2240.94	3.47785	0.0960528	36.2077	4.59954e-287	2.23944e-284	3.48218	5.81516	1087.17	2.03221e-238	1.26154e-235	3.15994	4.63004	35.6385	6.12102e-119	2.66651e-116	261.245
TMPRSS4	3739.75	8.0166	0.221647	36.1683	1.91579e-286	8.97566e-284	7.1973	6.57495	513.206	1.27276e-113	2.35674e-112	9.24828	1.90174	24.9638	6.01538e-80	1.34082e-78	171.671
ITGA2	2056.68	3.961	0.109553	36.1559	3.00301e-286	1.38088e-283	3.99574	5.72874	1001.87	7.03833e-220	2.53288e-217	3.65997	4.22704	32.2554	3.05527e-107	4.5702e-105	234.349
KRT19	26357.6	4.9677	0.13777	36.0579	1.03746e-284	4.60019e-282	4.97608	9.37924	905.395	6.59109e-199	1.31987e-196	5.29822	7.45809	30.5344	4.73235e-101	4.35219e-99	220.109
MSLN	5004.94	7.95644	0.220772	36.0392	2.03542e-284	8.86691e-282	7.05634	6.97169	501.676	4.10569e-111	7.08468e-110	8.41174	2.31072	21.1252	1.3403e-64	1.39778e-63	136.435
SDR16C5	558.162	6.20899	0.172515	35.991	1.15552e-283	4.86319e-281	6.17461	3.82609	861.15	2.73896e-189	4.00065e-187	5.87665	0.732847	18.2196	9.63438e-53	6.16417e-52	109.215
CEMIP	1193.87	5.45602	0.151742	35.9558	4.10856e-283	1.67245e-280	5.45813	4.92482	897.022	4.3564e-197	8.32107e-195	5.05391	2.37316	23.7922	2.5491e-75	4.41092e-74	161.017
LGALS3BP	13715.7	2.85847	0.0796477	35.889	4.54254e-282	1.79041e-279	2.87435	8.43622	1065.89	8.56862e-234	4.62538e-231	2.89439	7.67031	34.3728	1.23283e-114	3.25663e-112	251.344
KLK6	1076.09	9.06289	0.252569	35.8829	5.64555e-282	2.18962e-279	8.38752	4.76692	545.016	1.52872e-120	3.38019e-119	8.15939	-0.338037	16.5174	8.39423e-46	4.15379e-45	93.3411
KCNN4	1672.33	5.74132	0.160381	35.7979	1.18949e-280	4.47518e-278	5.73151	5.40361	865.498	3.10642e-190	4.70339e-188	5.74366	2.60914	23.916	8.22055e-76	1.45284e-74	162.152
CRIP1	2711.24	4.7799	0.134202	35.6171	7.62951e-278	2.74563e-275	4.77076	6.08711	924.652	4.29444e-203	9.78304e-201	4.6878	4.04888	36.8755	4.60532e-123	3.81183e-120	270.725
S100P	4358.75	7.89589	0.222125	35.547	9.24232e-277	3.18745e-274	7.51653	6.7613	610.627	8.17253e-135	2.66665e-133	8.29111	2.07157	20.9446	7.25674e-64	7.39401e-63	134.752
LAMB3	9152.82	5.38149	0.151614	35.4946	5.95922e-276	1.99964e-273	5.3954	7.85936	862.187	1.62938e-189	2.40828e-187	5.28975	5.38996	28.9376	3.64502e-95	2.1397e-93	206.578
SLC2A1	4841.8	4.57139	0.128843	35.4804	9.8461e-276	3.25985e-273	4.59767	6.94485	936.505	1.13813e-205	2.77068e-203	3.99704	5.02795	30.1173	1.58375e-99	1.29362e-97	216.591
SH3KBP1	1245.72	2.79456	0.0788753	35.4301	5.88512e-275	1.92281e-272	2.8172	4.98635	1066.32	6.89639e-234	3.80543e-231	2.68537	4.17059	39.6666	4.50332e-132	9.31849e-129	291.449
OSBPL10	600.673	2.79126	0.0788355	35.4062	1.37075e-274	4.42042e-272	2.82127	3.94415	1063.17	3.34615e-233	1.731e-230	2.59954	3.12501	33.5406	9.28549e-112	2.00494e-109	244.742
SLC6A14	908.897	7.70552	0.218496	35.2663	1.93342e-272	6.07705e-270	6.81857	4.5378	489.908	1.49258e-108	2.40977e-107	7.54053	0.25704	18.0394	5.25365e-52	3.26378e-51	107.554
MIA	607.826	6.66367	0.189141	35.2312	6.65948e-272	2.06702e-269	6.58463	3.93728	794.169	9.99535e-175	9.77144e-173	5.6523	0.469805	17.0644	5.00541e-48	2.67865e-47	98.3989
GJB4	189.658	6.47918	0.18461	35.0966	7.60339e-270	2.2747e-267	5.67799	2.30196	536.48	1.09928e-118	2.30737e-117	5.87029	-0.816311	19.122	1.96641e-56	1.45798e-55	117.724
S100A16	5338.85	3.48117	0.099218	35.0861	1.09961e-269	3.21229e-267	3.49078	7.06816	1010.42	9.73477e-222	3.77694e-219	3.0937	5.85054	31.5132	1.36475e-104	1.66118e-102	228.213
RHBDL2	203.371	4.26353	0.121697	35.034	6.83097e-269	1.94965e-266	4.23504	2.39692	952.907	3.09694e-209	8.45057e-207	4.01122	0.672191	22.7923	2.50212e-71	3.53013e-70	151.877
UBE2T	141.267	4.01227	0.114567	35.0213	1.06625e-268	3.00865e-266	3.95913	1.85409	1012.89	2.84147e-222	1.13801e-219	4.05145	0.276372	29.6991	5.46118e-98	3.96511e-96	213.076
PKM	24960.2	2.72023	0.0780203	34.8657	2.46305e-266	6.87192e-264	2.74778	9.30359	1004.99	1.47576e-220	5.63765e-218	2.94431	8.73956	32.6492	1.23434e-108	2.07094e-106	237.557
EFNB2	1547.53	2.78617	0.0799926	34.8304	8.43715e-266	2.30223e-263	2.82293	5.30682	1022.51	2.29871e-224	9.84126e-222	2.53646	4.47147	32.5563	2.62685e-108	4.26323e-106	236.775
IFI27	5865.57	4.73297	0.136163	34.7596	9.92396e-265	2.6785e-262	4.73581	7.20338	888.253	3.51199e-195	6.18485e-193	4.31541	5.18218	30.8237	4.2023e-102	4.17389e-100	222.522
LAMC2	10889.5	5.35578	0.154297	34.7109	5.39081e-264	1.39437e-261	5.36982	8.11916	816.159	1.65536e-179	1.84324e-177	5.37148	5.64531	30.1485	1.21713e-99	1.01418e-97	216.873
HOXB7	250.668	3.99366	0.115139	34.6856	1.30102e-263	3.33049e-261	3.96254	2.67603	965.026	7.1868e-212	2.23069e-209	3.64829	1.147	22.6997	5.88681e-71	8.17536e-70	151.009
MUC13	3487.49	5.09577	0.14692	34.6841	1.37026e-263	3.47192e-261	5.09769	6.45707	850.074	7.0074e-187	9.50824e-185	4.29193	4.15366	21.491	4.40845e-66	4.91762e-65	139.69
CDHR2	847.5	6.22397	0.179737	34.6282	9.5063e-263	2.38435e-260	6.20295	4.44017	778.65	2.36574e-171	2.09053e-169	5.8242	1.19099	18.8959	1.65283e-55	1.17597e-54	115.551
GPRC5A	9946.06	5.25221	0.151732	34.6151	1.49647e-262	3.71589e-260	5.28683	7.98411	836.889	5.15263e-184	6.69869e-182	5.00852	5.57564	24.6526	1.00635e-78	2.08762e-77	168.742
ANO1	2664.99	3.79998	0.109783	34.6135	1.58057e-262	3.88585e-260	3.82893	6.09124	945.119	1.52662e-207	3.99025e-205	3.54975	4.66108	32.122	9.10708e-107	1.30716e-104	233.248
ACSL5	2377.48	3.78893	0.109683	34.5444	1.73146e-261	4.17416e-259	3.81527	5.91994	955.811	7.2374e-210	2.06565e-207	3.25142	4.50929	26.1263	1.76955e-84	5.05055e-83	181.959
MMP28	675.809	4.5843	0.133198	34.4171	1.39998e-259	3.34258e-257	4.57818	4.10124	887.736	4.54791e-195	7.95276e-193	4.29109	2.14756	25.0788	2.12915e-80	4.86375e-79	172.682
LAMA3	4235.79	4.00927	0.116678	34.3619	9.34941e-259	2.19014e-256	4.05672	6.76472	922.941	1.01122e-202	2.28269e-200	3.44946	5.18599	26.8913	1.99789e-87	7.01692e-86	188.725
EFNA5	468.343	3.74412	0.109196	34.2879	1.18671e-257	2.70342e-255	3.75074	3.58449	943.519	3.40125e-207	8.79755e-205	3.57548	2.19488	26.3443	2.5402e-85	7.71097e-84	183.988
VSIG2	1346.13	5.66524	0.165276	34.2775	1.69927e-257	3.83587e-255	5.6475	5.08418	802.679	1.41141e-176	1.42466e-174	5.21299	2.29393	18.4575	1.02568e-53	6.78986e-53	111.383
CKLF	632.121	2.62236	0.0765294	34.266	2.51609e-257	5.62857e-255	2.63566	4.00124	1045.41	2.42484e-229	1.15791e-226	2.32837	3.26246	30.0565	2.64599e-99	2.10585e-97	216.091
PPIAP22	972.252	2.21454	0.0646803	34.2382	6.54116e-257	1.45021e-254	2.23576	4.61761	1090.68	3.50662e-239	2.29139e-236	2.08976	4.06104	37.1814	4.52902e-124	4.32538e-121	273.044
ASPHD2	314.716	3.69621	0.108034	34.2133	1.53481e-256	3.37264e-254	3.68944	3.00013	967.992	1.62846e-212	5.11853e-210	3.24349	1.64554	23.6393	1.03394e-74	1.73942e-73	159.616
HS3ST1	802.648	4.49098	0.131484	34.156	1.08999e-255	2.35352e-253	4.48618	4.35052	877.008	9.77169e-193	1.59632e-190	4.22487	2.45322	25.5084	4.45521e-82	1.12198e-80	176.534
APOL1	5632.14	4.07057	0.119298	34.121	3.60541e-255	7.58695e-253	4.09118	7.16445	890.857	9.53905e-196	1.72894e-193	3.92118	5.55279	34.6696	1.18499e-115	3.50293e-113	253.684
CKS2	283.347	3.58945	0.10532	34.0814	1.39103e-254	2.87839e-252	3.57495	2.84468	985.543	2.49298e-216	8.2133e-214	3.30783	1.55445	26.1334	1.66037e-84	4.75531e-83	182.127
PTTG1	244.15	3.98065	0.117284	33.9404	1.68852e-252	3.40875e-250	3.94728	2.62782	942.34	6.1355e-207	1.5546e-204	3.88315	1.07469	27.507	8.90319e-90	3.63013e-88	194.24
ANLN	438.994	4.82444	0.142206	33.9257	2.7891e-252	5.58518e-250	4.82252	3.50189	853.333	1.37044e-187	1.91176e-185	4.79101	1.31942	23.9754	4.77729e-76	8.52803e-75	162.707
MALL	3310.99	4.27507	0.126384	33.8261	8.14408e-251	1.55558e-248	4.28941	6.39188	871.372	1.64209e-191	2.51696e-189	3.92343	4.63014	30.3286	2.66876e-100	2.34993e-98	218.378
DHRS9	898.936	7.12811	0.210814	33.8124	1.29665e-250	2.4578e-248	5.55756	4.53251	347.554	1.44469e-77	1.13738e-76	5.77847	0.468486	15.5255	8.57313e-42	3.72102e-41	84.0998
FAM83A	794.866	7.83734	0.232449	33.7164	3.31927e-249	6.244e-247	7.13286	4.33361	501.783	3.89031e-111	6.72704e-110	6.6962	-0.233492	15.5377	7.66028e-42	3.33355e-41	84.2471
MFSD2A	268.365	4.51229	0.134271	33.6058	1.38013e-247	2.55747e-245	4.46583	2.75842	880.367	1.81871e-193	3.01069e-191	3.98534	0.857735	22.2908	2.59355e-69	3.342e-68	147.243
MGLL	3699.22	3.13342	0.0933314	33.573	4.15102e-247	7.63511e-245	3.16488	6.55849	935.211	2.17536e-205	5.2443e-203	2.84629	5.50229	32.4163	8.22009e-108	1.29185e-105	235.623
VILL	2097.64	4.16618	0.124172	33.5518	8.48747e-247	1.54965e-244	4.18563	5.73268	873.471	5.74095e-192	9.02237e-190	3.46848	4.05552	23.298	2.37071e-73	3.71167e-72	156.383
HRH1	315.662	3.96634	0.118356	33.512	3.2255e-246	5.84616e-244	3.96064	3.01828	899.031	1.59418e-197	3.14167e-195	4.08411	1.44268	30.3077	3.17964e-100	2.78988e-98	218.231
NRP2	1651.03	3.64361	0.108753	33.5035	4.28583e-246	7.71171e-244	3.667	5.40097	895.523	9.22568e-197	1.70957e-194	3.46249	4.06118	32.6124	1.66427e-108	2.75504e-106	237.256
NBL1	7072.81	3.40748	0.10202	33.4002	1.36345e-244	2.41827e-242	3.41392	7.4812	896.25	6.41156e-197	1.21531e-194	3.41875	6.29179	36.2049	7.73657e-121	4.26904e-118	265.605
GALNT5	852.863	6.62044	0.198294	33.3869	2.12104e-244	3.70899e-242	6.61285	4.45022	694.727	4.19065e-153	2.30727e-151	7.26698	0.815886	21.8878	1.09451e-67	1.30725e-66	143.532
CTSE	11523.1	6.53461	0.19655	33.2465	2.29013e-242	3.89494e-240	6.53588	8.19575	672.548	2.78942e-148	1.30687e-146	6.77305	4.60949	21.9557	5.82081e-68	7.04026e-67	144.078
LINC00857	109.618	3.9023	0.117715	33.1505	5.56799e-241	9.40536e-239	3.85339	1.50767	905.523	6.1834e-199	1.24829e-196	3.64544	-0.00649657	23.2686	3.10681e-73	4.83732e-72	156.263
DKK1	378.573	6.29361	0.189879	33.1454	6.59244e-241	1.09864e-238	5.56576	3.29633	492.715	3.657e-109	5.97021e-108	5.25263	-0.0137362	15.7541	1.02988e-42	4.60606e-42	86.2247
FERMT1	1003.86	3.48317	0.10513	33.132	1.0283e-240	1.70224e-238	3.50847	4.67468	911.464	3.15972e-200	6.59319e-198	2.88354	3.43067	17.9549	1.16327e-51	7.12687e-51	106.511
MDK	3857.74	3.60752	0.10891	33.1239	1.34621e-240	2.21375e-238	3.60007	6.5968	885.27	1.56339e-194	2.65894e-192	3.46481	5.26915	35.7925	1.85766e-119	8.38683e-117	262.434
LEMD1	127.484	6.98809	0.211045	33.1118	2.00991e-240	3.28343e-238	6.41861	1.71836	629.735	5.70884e-139	2.08159e-137	5.93138	-1.55201	20.9074	1.0277e-63	1.03735e-62	134.435
S100A10	8950.82	3.11407	0.0941676	33.0694	8.1819e-240	1.32787e-237	3.12958	7.82023	910.003	6.56571e-200	1.33634e-197	2.90859	6.80733	31.1444	2.90232e-103	3.16086e-101	225.162
SHISA2	182.5	3.98837	0.12072	33.0383	2.2936e-239	3.67435e-237	3.96853	2.23759	875.809	1.78085e-192	2.87144e-190	3.89043	0.644766	25.1239	1.41751e-80	3.28954e-79	173.11
SULF2	3848.13	3.28989	0.0996478	33.0152	4.91757e-239	7.82744e-237	3.30698	6.61369	881.713	9.27129e-194	1.54507e-191	3.14581	5.45607	33.7471	1.7802e-112	4.09298e-110	246.364
IGFBP3	8826.69	4.24103	0.128632	32.9701	2.17621e-238	3.44187e-236	4.26342	7.81403	815.016	2.9334e-179	3.22297e-177	4.29214	6.08217	32.4799	4.89268e-108	7.83808e-106	236.164
SLC4A11	304.578	4.01981	0.121967	32.9581	3.24382e-238	5.06587e-236	4.00059	2.94755	874.828	2.91093e-192	4.63341e-190	3.42601	1.36679	19.2598	5.37455e-57	4.07373e-56	118.925
B3GNT3	1584.12	4.06752	0.123573	32.9158	1.30473e-237	2.02486e-235	4.09551	5.32676	863.77	7.37855e-190	1.10371e-187	3.90023	3.67064	24.4416	6.83637e-78	1.34299e-76	166.858
ITGB4	8924.19	3.54784	0.107791	32.9141	1.38285e-237	2.13277e-235	3.57557	7.82544	867.607	1.08102e-190	1.64679e-188	3.04883	6.5562	24.4596	5.80067e-78	1.14496e-76	166.925
SKAP2	1209.86	2.2765	0.0692562	32.8706	5.77819e-237	8.85668e-235	2.31255	4.94948	941.061	1.16367e-206	2.91871e-204	2.08992	4.34508	32.9467	1.1071e-109	2.02135e-107	239.934
TFAP2A	227.376	4.53216	0.138175	32.8003	5.83937e-236	8.84131e-234	4.49396	2.54526	827.05	7.09442e-182	8.51022e-180	4.15158	0.584855	20.2046	7.45897e-61	6.67677e-60	127.827
FXYD5	3593.59	3.64265	0.111382	32.7041	1.36535e-234	2.01804e-232	3.62133	6.4775	879.769	2.45415e-193	4.0357e-191	3.35947	5.13727	34.1701	6.13968e-114	1.50945e-111	249.736
HNRNPCP2	106.56	2.82129	0.0862938	32.694	1.89947e-234	2.79087e-232	2.80933	1.47938	927.026	1.3085e-203	3.03659e-201	2.93884	0.562433	36.4608	1.0879e-121	6.92657e-119	267.446
LINC01559	283.299	7.94203	0.243237	32.6515	7.6381e-234	1.10913e-231	6.16716	2.89355	310.009	2.17446e-69	1.43031e-68	6.95468	-1.25309	19.0564	3.64862e-56	2.67648e-55	117.116
SDC1	6634.49	3.40607	0.104334	32.6459	9.17238e-234	1.32418e-231	3.41983	7.38685	872.148	1.11355e-191	1.72815e-189	3.08491	6.18223	28.0384	8.62509e-92	4.04857e-90	198.749
HPGD	844.397	4.79716	0.147323	32.5621	1.41382e-232	2.01762e-230	4.8124	4.43885	776.704	6.26718e-171	5.44127e-169	4.36047	2.24353	21.4065	9.69353e-66	1.06646e-64	138.992
CYP2S1	1385.35	5.86255	0.180169	32.5391	2.98758e-232	4.23912e-230	5.85365	5.13603	706.365	1.23494e-155	7.23229e-154	5.69719	2.02127	20.8331	2.06019e-63	2.05366e-62	133.679
ST6GALNAC1	998.241	5.24063	0.161277	32.4946	1.27162e-231	1.77391e-229	5.22708	4.65075	748.798	7.32404e-165	5.56157e-163	4.50985	2.11433	16.9943	9.66632e-48	5.12982e-47	97.6519
TRIM31	543.893	5.8995	0.181925	32.4282	1.09854e-230	1.50706e-228	5.8583	3.78537	713.835	2.93246e-157	1.79792e-155	5.48221	0.713992	16.8219	4.86015e-47	2.51421e-46	96.1231
PADI1	904.728	7.64975	0.236105	32.3998	2.75945e-230	3.74426e-228	6.80749	4.52156	446.297	4.61271e-99	6.03468e-98	6.4191	-0.0331286	13.5626	5.16308e-34	1.73931e-33	66.2947
CDK1	296.867	3.86252	0.119304	32.3755	6.06766e-230	8.18837e-228	3.85018	2.92253	850.248	6.42317e-187	8.7634e-185	3.8696	1.3919	26.0924	2.39427e-84	6.78677e-83	181.767
SPDEF	516.281	5.41735	0.167455	32.3511	1.33914e-229	1.79742e-227	5.36838	3.69398	734.676	8.62031e-162	5.88052e-160	4.70208	1.02515	16.6961	1.57834e-46	7.99179e-46	94.9265
KIF2C	207.739	3.7596	0.116233	32.3453	1.61732e-229	2.15912e-227	3.73925	2.40839	864.53	5.04335e-190	7.58979e-188	3.54973	0.95248	24.4762	4.99069e-78	9.91392e-77	167.257
LINC01133	416.329	5.97472	0.184982	32.299	7.23358e-229	9.50355e-227	5.92591	3.39513	699.457	3.92388e-154	2.21945e-152	5.57333	0.281982	16.8301	4.50343e-47	2.33357e-46	96.2159
S100A2	1357.95	7.13597	0.221157	32.2666	2.06113e-228	2.69368e-226	7.11088	5.12331	616	5.54215e-136	1.85718e-134	4.82739	0.783465	13.4501	1.41312e-33	4.70363e-33	65.2335
COL10A1	2734.65	6.77691	0.210159	32.2466	3.92714e-228	5.10549e-226	5.15186	6.16121	301.744	1.37358e-67	8.6304e-67	7.65094	2.13874	23.541	2.5458e-74	4.18087e-73	158.752
OCIAD2	2150.55	2.58227	0.0801122	32.2332	6.05961e-228	7.83678e-226	2.59922	5.75524	956.959	4.07433e-210	1.17639e-207	2.1953	4.99255	31.3328	6.0735e-104	7.01447e-102	226.711
MAD2L1	196.426	2.9948	0.0929462	32.2208	9.02246e-228	1.16081e-225	3.00127	2.33768	898.998	1.62013e-197	3.16768e-195	2.71795	1.34609	24.7649	3.6385e-79	7.75515e-78	169.855
ANXA2P2	384.7	3.2407	0.10093	32.1083	3.37874e-226	4.28049e-224	3.25351	3.30332	859.916	5.07869e-189	7.28953e-187	3.0851	2.17813	24.1267	1.20077e-76	2.20209e-75	164.04
SLC16A1	772.982	2.93722	0.0916	32.0658	1.32429e-225	1.64418e-223	2.97376	4.30515	886.7	7.63854e-195	1.31717e-192	2.6046	3.36079	25.3514	1.82646e-81	4.42467e-80	175.054
SLC44A4	4114.31	3.85856	0.120375	32.0544	1.90479e-225	2.34148e-223	3.87949	6.70773	814.533	3.73548e-179	4.05047e-177	3.47913	5.17924	24.7198	5.47102e-79	1.1503e-77	169.309
MARCKSL1	4046.01	2.99338	0.0934506	32.0317	3.95105e-225	4.83293e-223	3.00289	6.67009	876.52	1.24815e-192	2.02567e-190	2.77968	5.682	32.7538	5.28043e-109	8.98071e-107	238.364
AHR	2809.45	2.59427	0.0810394	32.0125	7.31725e-225	8.86315e-223	2.63226	6.16683	873.213	6.5331e-192	1.02027e-189	2.33295	5.37923	29.6551	7.93741e-98	5.66362e-96	212.629
FAM101A	553.488	5.57298	0.174157	31.9998	1.09755e-224	1.32298e-222	5.55232	3.81263	708.698	3.84008e-156	2.29766e-154	5.94259	0.951548	24.8683	1.42707e-79	3.09482e-78	170.809
BCAS1	1252.71	5.17109	0.162009	31.9186	1.47326e-223	1.74203e-221	5.17076	4.99143	724.817	1.20005e-159	7.73987e-158	4.61462	2.46586	17.6842	1.48394e-50	8.71722e-50	104.098
KRT16	1550.21	6.92081	0.216863	31.9132	1.74963e-223	2.059e-221	6.29551	5.27717	478.212	5.23253e-106	7.9858e-105	5.79513	1.18659	14.0331	7.45822e-36	2.65741e-35	70.4513
PNMA1	1192.99	2.37284	0.074373	31.9046	2.30807e-223	2.70338e-221	2.39804	4.92436	891.776	6.02036e-196	1.0992e-193	2.16458	4.27992	32.3823	1.08466e-107	1.68332e-105	235.355
RHOF	715.347	3.62969	0.114	31.8393	1.85301e-222	2.16019e-220	3.64989	4.18815	835.732	9.19286e-184	1.18274e-181	3.18239	2.82431	21.8558	1.47343e-67	1.74306e-66	143.113
OASL	472.471	5.02651	0.158048	31.8036	5.77109e-222	6.69636e-220	4.99967	3.57874	734.947	7.52442e-162	5.14708e-160	4.85023	1.15866	20.8316	2.08959e-63	2.08213e-62	133.677
PPP1R14D	105.621	5.63771	0.177286	31.8001	6.44362e-222	7.44193e-220	5.56246	1.44665	749.706	4.64971e-165	3.54162e-163	4.82452	-1.20115	21.3407	1.79074e-65	1.94174e-64	138.466
WNT2	202.74	5.93581	0.186775	31.7806	1.2011e-221	1.3744e-219	4.99324	2.40495	400.111	5.2084e-89	5.3865e-88	5.95534	-0.608218	20.9694	5.75123e-64	5.87932e-63	135.005
BIK	315.885	3.70082	0.116704	31.7112	1.08967e-220	1.23551e-218	3.67488	2.9926	829.939	1.67087e-182	2.06083e-180	3.23586	1.58294	20.7733	3.60725e-63	3.56433e-62	133.094
SLC22A18AS	54.8608	4.27907	0.135156	31.6602	5.49382e-220	6.11736e-218	4.2116	0.541715	850.76	4.96983e-187	6.818e-185	4.02912	-1.20885	26.4574	9.30194e-86	2.8836e-84	184.981
CELSR1	954.434	3.23002	0.102037	31.6553	6.4009e-220	7.09557e-218	3.25845	4.61108	834.346	1.84022e-183	2.34331e-181	2.87751	3.49097	24.3163	2.13578e-77	4.0795e-76	165.698
IHH	234.259	6.62634	0.209472	31.6336	1.27551e-219	1.40142e-217	6.55415	2.57632	655.178	1.67137e-144	7.2177e-143	5.96696	-0.919236	18.7944	4.29703e-55	3.00477e-54	114.654
ECT2	602.001	2.78387	0.0880222	31.6269	1.57473e-219	1.72256e-217	2.81924	3.94739	862.37	1.48738e-189	2.21156e-187	2.42644	3.0715	23.2733	2.97645e-73	4.64248e-72	156.172
NMU	138.809	7.0374	0.222767	31.5908	4.94255e-219	5.38283e-217	6.97212	1.82619	701.467	1.43424e-154	8.16828e-153	6.12844	-1.63586	21.8417	1.68089e-67	1.98564e-66	143.117
GPR35	640.79	3.89703	0.123393	31.5822	6.47586e-219	7.02192e-217	3.88856	4.01171	809.601	4.41116e-178	4.70101e-176	3.31322	2.47297	18.556	4.05926e-54	2.73011e-53	112.242
VDR	860.432	2.70857	0.0857942	31.5706	9.35197e-219	1.00965e-216	2.7332	4.45487	861.797	1.98076e-189	2.91031e-187	2.55373	3.63206	29.0545	1.33682e-95	8.05695e-94	207.563
TRIM29	3041.4	5.64278	0.178934	31.5356	2.82486e-218	3.02346e-216	5.65946	6.27098	675.674	5.82983e-149	2.78386e-147	5.055	3.2926	16.2889	7.09476e-45	3.399e-44	91.0222
KIAA1211	283.542	3.94669	0.125323	31.4922	1.1124e-217	1.18043e-215	3.95699	2.88616	780.905	7.65223e-172	6.93476e-170	3.7243	1.25415	21.8856	1.11725e-67	1.33378e-66	143.474
MYOF	4274.36	2.83119	0.0899052	31.4908	1.16076e-217	1.22131e-215	2.86942	6.77419	828.456	3.51003e-182	4.25159e-180	2.51789	5.84602	27.7421	1.13998e-90	4.91439e-89	196.155
AK4	766.033	3.58246	0.114002	31.4244	9.38257e-217	9.74806e-215	3.61446	4.30158	804.304	6.25692e-177	6.34145e-175	3.22511	2.94123	22.3847	1.08644e-69	1.42738e-68	148.011
WNT10A	214.007	5.71155	0.181827	31.412	1.38969e-216	1.43781e-214	5.66636	2.46161	689.579	5.51996e-152	2.9163e-150	5.5469	-0.438757	22.1859	6.86575e-69	8.64959e-68	146.299
DPCR1	4816.07	8.10303	0.258223	31.38	3.79164e-216	3.87449e-214	7.66432	6.96305	460.708	3.37117e-102	4.69487e-101	7.33396	1.54797	12.7233	8.83845e-31	2.70314e-30	58.8457
EMB	1000.68	3.25315	0.103685	31.3752	4.40393e-216	4.48172e-214	3.27099	4.67606	818.021	6.51662e-180	7.42267e-178	3.22036	3.54116	31.2441	1.26814e-103	1.43786e-101	226.034
PITX1	453.201	5.76348	0.18386	31.347	1.06808e-215	1.08251e-213	4.84821	3.53861	400.735	3.8092e-89	3.9609e-88	5.67186	0.504213	17.6443	2.15985e-50	1.26161e-49	103.825
PRR11	101.413	3.50699	0.112083	31.2892	6.54021e-215	6.54839e-213	3.48143	1.41257	823.121	5.07345e-181	5.999e-179	3.308	0.08348	24.3484	1.59508e-77	3.07272e-76	166.108
CDH3	1678.02	4.85139	0.15549	31.2007	1.04198e-213	1.03494e-211	4.85308	5.41827	705.979	1.49813e-155	8.75294e-154	4.88876	3.08975	25.8057	3.10082e-83	8.30598e-82	179.189
CD109	713.128	3.68555	0.118163	31.1904	1.43997e-213	1.42454e-211	3.71192	4.20207	777.417	4.38533e-171	3.82078e-169	3.2489	2.77177	22.1974	6.1682e-69	7.78661e-68	146.287
PFKP	2829.17	2.83626	0.0910014	31.1672	2.97036e-213	2.92686e-211	2.86289	6.16864	829.837	1.75799e-182	2.15037e-180	2.59228	5.24355	31.7298	2.28292e-105	2.98353e-103	229.996
SKA3	73.908	4.04635	0.130035	31.1174	1.4018e-212	1.35969e-210	4.0032	0.947337	813.123	7.56511e-179	8.13201e-177	4.13969	-0.739033	27.4081	2.11844e-89	8.33646e-88	193.346
SGPP2	858.616	2.8921	0.0929664	31.1091	1.81448e-212	1.75313e-210	2.93554	4.46705	815.97	1.81973e-179	2.00825e-177	2.49889	3.52243	21.9918	4.16183e-68	5.07327e-67	144.312
EPHX4	50.4969	5.154	0.165706	31.1032	2.17719e-212	2.09542e-210	5.08924	0.427651	822.985	5.42984e-181	6.35983e-179	5.0467	-1.82457	29.8689	1.29335e-98	9.70247e-97	214.403
HEPH	1091.75	3.6638	0.117807	31.1	2.40798e-212	2.30859e-210	3.66805	4.7913	781.26	6.40598e-172	5.82662e-170	3.32448	3.39304	25.8274	2.55318e-83	6.88361e-82	179.339
USH1C	1409.07	3.43184	0.110433	31.0761	5.06521e-212	4.83747e-210	3.43224	5.14709	809.561	4.50067e-178	4.77591e-176	2.96409	3.90448	19.8158	2.87695e-59	2.40288e-58	123.974
NT5E	953.095	3.68553	0.118653	31.0614	8.00486e-212	7.58659e-210	3.70683	4.6076	778.456	2.60741e-171	2.29591e-169	3.35704	3.17375	25.2756	3.61252e-81	8.6669e-80	174.402
UGT1A10	933.463	9.00373	0.290563	30.9872	8.03075e-211	7.52496e-209	7.75894	4.58029	352.616	1.14175e-78	9.21375e-78	8.81499	-0.485111	18.356	2.66695e-53	1.73404e-52	110.54
PCDH7	772.179	4.41561	0.142617	30.9613	1.78983e-210	1.65833e-208	4.43226	4.31905	716.82	6.57989e-158	4.08463e-156	4.44167	2.33166	24.826	2.09184e-79	4.49718e-78	170.399
FAM3D	1089.23	6.47917	0.209331	30.9518	2.40086e-210	2.2162e-208	6.01227	4.70355	515.14	4.82913e-114	9.04316e-113	5.18964	0.995008	15.4296	2.08312e-41	8.91979e-41	83.1855
KIF11	264.155	2.91227	0.094165	30.9274	5.12326e-210	4.69431e-208	2.93025	2.75962	833.565	2.72012e-183	3.41127e-181	2.69434	1.796	22.8956	9.65035e-72	1.38915e-70	152.775
KRT17	10041.6	6.60086	0.213651	30.8955	1.37383e-209	1.25417e-207	5.5337	7.99562	365.128	2.15264e-81	1.84636e-80	6.71379	4.04582	22.1953	6.28716e-69	7.92469e-68	146.315
ANXA8	717.293	6.31979	0.204683	30.8759	2.51646e-209	2.28052e-207	6.28353	4.19559	616.156	5.12701e-136	1.72039e-134	5.37481	0.637536	14.0892	4.48754e-36	1.61376e-35	70.9736
TPX2	501.949	4.63754	0.150341	30.8468	6.19153e-209	5.59062e-207	4.631	3.67668	718.433	2.93326e-158	1.84394e-156	5.0395	1.48938	26.884	2.13065e-87	7.4411e-86	188.776
WNT7B	380.495	4.01035	0.130023	30.8434	6.8781e-209	6.18805e-207	4.01626	3.29083	754.223	4.84484e-166	3.72453e-164	3.62242	1.61753	18.1539	1.78827e-52	1.13046e-51	108.527
TMEM92	361.373	4.32984	0.140576	30.8006	2.56959e-208	2.29516e-206	4.31362	3.19908	747.137	1.68258e-164	1.25844e-162	4.13406	1.29502	17.3945	2.2594e-49	1.27305e-48	101.433
ADGRF1	536.283	5.52146	0.179364	30.7835	4.36112e-208	3.8814e-206	5.50687	3.78112	656.969	6.81461e-145	2.95828e-143	5.52287	0.901057	16.5232	7.9556e-46	3.93988e-45	93.331
SLC16A4	333.925	3.40012	0.110467	30.7796	4.92024e-208	4.36338e-206	3.41799	3.10663	780.298	1.03669e-171	9.29312e-170	2.99635	1.85925	20.3384	2.12465e-61	1.94318e-60	129.005
HOXA10	113.629	5.9493	0.193376	30.7655	7.57906e-208	6.67361e-206	5.86039	1.56008	687.007	2.00023e-151	1.02387e-149	4.66225	-1.36106	17.1524	2.1933e-48	1.18886e-47	99.2798
ELF4	810.213	2.40038	0.0781381	30.7197	3.10416e-207	2.70454e-205	2.43394	4.37063	837.627	3.56093e-184	4.65377e-182	2.25594	3.68843	30.9913	1.03788e-102	1.07382e-100	223.913
CTD-2377D24.6	297.256	9.03394	0.294191	30.7077	4.48692e-207	3.89562e-205	6.23306	2.94703	218.312	2.11181e-49	8.80873e-49	6.75333	-1.789	15.6512	2.67405e-42	1.17876e-41	85.3335
CEP55	209.33	4.7394	0.154395	30.6966	6.32115e-207	5.46901e-205	4.71541	2.42826	707.47	7.10182e-156	4.1788e-154	5.23675	0.157331	26.0939	2.36227e-84	6.71138e-83	181.783
FXYD3	5192.34	3.86862	0.126168	30.6626	1.79738e-206	1.539e-204	3.87288	7.00866	775.972	9.04351e-171	7.74343e-169	3.41266	5.44048	24.6466	1.06248e-78	2.20037e-77	168.633
ABHD17C	1324.91	2.92702	0.095503	30.6484	2.77247e-206	2.36575e-204	2.95241	5.06428	834.101	2.08035e-183	2.63558e-181	2.34539	4.09349	22.8062	2.20209e-71	3.11567e-70	151.808
MUC17	1116.35	8.58358	0.280097	30.6451	3.07315e-206	2.61333e-204	7.49031	4.85692	354.155	5.27727e-79	4.29921e-78	6.86948	-0.525938	11.9247	8.97191e-28	2.51532e-27	52.0354
EDIL3	1164.32	3.72034	0.121483	30.6243	5.81251e-206	4.87603e-204	3.7421	4.90245	740.863	3.89105e-163	2.76844e-161	3.53043	3.43247	27.0059	7.26821e-88	2.61561e-86	189.798
CREG2	78.7643	4.71164	0.154047	30.5857	1.89644e-205	1.58022e-203	4.65371	1.05537	732.517	2.54065e-161	1.70967e-159	4.222	-1.04517	21.0293	3.28565e-64	3.3797e-63	135.566
UBE2C	318.911	5.05273	0.165325	30.5625	3.85962e-205	3.20529e-203	5.01492	3.00885	684.143	8.39264e-151	4.23573e-149	5.44864	0.495442	24.9446	7.15953e-80	1.59299e-78	171.498
TMC7	307.735	3.40994	0.111685	30.5317	9.87984e-205	8.09658e-203	3.45391	2.97906	821.122	1.37972e-180	1.60845e-178	3.00664	1.69434	18.516	5.91482e-54	3.94285e-53	111.91
BCAR3	659.484	2.40239	0.0786878	30.5306	1.02288e-204	8.35494e-203	2.43508	4.07291	832.056	5.78953e-183	7.22411e-181	2.0059	3.39225	24.2514	3.85539e-77	7.25801e-76	165.084
LY75	931.922	3.31669	0.108719	30.5071	2.09725e-204	1.70186e-202	3.35447	4.58441	772.253	5.82046e-170	4.84993e-168	3.07057	3.37293	22.6391	1.03156e-70	1.41831e-69	150.335
KIF4A	167.74	4.39463	0.144175	30.4813	4.61322e-204	3.70715e-202	4.36621	2.1129	728.552	1.84967e-160	1.21185e-158	4.86795	0.09908	29.3288	1.27865e-96	8.35532e-95	209.925
SAMD9	1003.11	2.88825	0.0948304	30.457	9.67229e-204	7.7475e-202	2.91986	4.68161	792.763	2.02039e-174	1.95207e-172	2.53026	3.73839	24.9112	9.68328e-80	2.12596e-78	171.066
BUB1	181.668	4.05345	0.133169	30.4384	1.70615e-203	1.36223e-201	4.03961	2.23326	740.946	3.73326e-163	2.66381e-161	4.31766	0.473655	26.4828	7.42412e-86	2.31885e-84	185.235
CRABP2	1124.11	5.01127	0.16465	30.4358	1.84427e-203	1.46779e-201	4.99276	4.8198	669.993	1.00277e-147	4.62822e-146	4.29931	2.34192	18.1377	2.08253e-52	1.31314e-51	108.351
AQP5	1181.78	5.51373	0.181228	30.4244	2.61521e-203	2.0747e-201	5.45066	4.85074	643.083	7.1341e-142	2.82531e-140	4.31247	1.98334	12.6569	1.58204e-30	4.80298e-30	58.161
CCNB2	204.884	3.49001	0.114739	30.4168	3.29449e-203	2.60527e-201	3.47827	2.38919	782.556	3.34711e-172	3.06687e-170	3.17834	1.06556	20.6448	1.20201e-62	1.16273e-61	131.917
PLAUR	1969.77	4.00717	0.13181	30.4012	5.29114e-203	4.17093e-201	4.00932	5.63775	720.131	1.25394e-158	7.98372e-157	4.01336	3.94805	30.2805	3.9987e-100	3.45964e-98	217.99
CDCA5	224.061	3.53042	0.116299	30.3565	2.06121e-202	1.61968e-200	3.51057	2.5174	776.418	7.23361e-171	6.23673e-169	3.40047	1.15566	24.1662	8.38299e-77	1.5488e-75	164.438
HLA-A	26761.9	2.79804	0.0922015	30.347	2.74829e-202	2.15277e-200	2.80726	9.39649	771.04	1.06804e-169	8.72388e-168	3.18367	8.73189	29.8654	1.33315e-98	9.97088e-97	214.481
EFNB1	2221.38	2.79524	0.0921276	30.3409	3.30922e-202	2.584e-200	2.80842	5.80766	806.271	2.33634e-177	2.40721e-175	2.3697	4.90738	26.9929	8.15065e-88	2.92047e-86	189.594
AGR3	649.018	4.48397	0.147788	30.3406	3.34149e-202	2.60102e-200	4.47149	4.02804	700.006	2.98196e-154	1.69052e-152	3.51697	1.99726	13.512	8.12658e-34	2.72139e-33	65.6714
SEC14L2	655.688	2.74166	0.0904489	30.3117	8.04587e-202	6.2239e-200	2.76248	4.06136	799.552	6.75329e-176	6.78911e-174	2.39057	3.20538	25.103	1.71285e-80	3.93812e-79	172.819
ITGB5	5842.31	2.39543	0.0791432	30.267	3.11672e-201	2.38127e-199	2.42676	7.21551	792.645	2.14327e-174	2.06277e-172	2.17401	6.50094	29.2643	2.21918e-96	1.41656e-94	209.302
PLAT	7219.79	4.36018	0.14411	30.2558	4.37146e-201	3.32968e-199	4.397	7.53563	689.224	6.59347e-152	3.45406e-150	3.99211	5.57742	27.5251	7.59742e-90	3.11821e-88	194.302
CENPE	136.309	3.37936	0.111767	30.2358	8.01476e-201	6.08341e-199	3.37192	1.82957	772.078	6.35362e-170	5.27648e-168	3.34605	0.530929	23.8742	1.2041e-75	2.10853e-74	161.792
EPS8L3	1411.29	5.6578	0.187186	30.2256	1.09219e-200	8.2432e-199	5.64993	5.15928	619.39	1.01468e-136	3.47047e-135	6.12236	2.05055	20.4681	6.29769e-62	5.90997e-61	130.274
CCNB1	399.708	2.60948	0.0864833	30.1733	5.31449e-200	3.91585e-198	2.63104	3.34746	818.725	4.58212e-180	5.26753e-178	2.24289	2.5547	22.205	5.74721e-69	7.26624e-68	146.342
CARD11	1234.2	3.78963	0.125634	30.1642	6.99167e-200	5.1364e-198	3.79983	4.96854	729.347	1.2419e-160	8.17972e-159	3.70542	3.44419	26.691	1.1739e-86	3.91264e-85	187.023
INHBA	1774.89	5.28854	0.175546	30.1262	2.20257e-199	1.60859e-197	4.53665	5.53969	385.772	6.8923e-86	6.63087e-85	5.79477	2.72503	27.7231	1.34522e-90	5.72954e-89	196.123
BATF	247.74	4.23748	0.140687	30.1199	2.66283e-199	1.93902e-197	4.19206	2.64808	716.148	9.20991e-158	5.70303e-156	4.29648	0.780159	25.066	2.39028e-80	5.43028e-79	172.589
SEMA3C	1422.64	4.09664	0.136068	30.1073	3.88463e-199	2.82044e-197	4.12639	5.20173	691.19	2.46338e-152	1.32113e-150	4.02754	3.40943	24.7057	6.21959e-79	1.30328e-77	169.269
BCO1	51.094	4.01625	0.13347	30.0909	6.36796e-199	4.59659e-197	3.95681	0.458562	757.581	9.01703e-167	6.99693e-165	3.89701	-1.21609	24.6153	1.411e-78	2.89798e-77	168.518
CDA	300.138	4.60196	0.153015	30.0752	1.02275e-198	7.33986e-197	4.57571	2.94163	689.179	6.74269e-152	3.52479e-150	4.12389	0.783545	19.3147	3.20769e-57	2.45379e-56	119.476
NDC80	139.225	3.78023	0.125712	30.0705	1.17772e-198	8.42765e-197	3.74305	1.84561	745.421	3.97316e-164	2.95382e-162	3.90369	0.282388	27.8771	3.51173e-91	1.57685e-89	197.455
FAM83E	633.941	4.50628	0.150026	30.0366	3.2706e-198	2.32035e-196	4.49514	4.00468	686.387	2.72838e-151	1.38829e-149	4.31909	1.91076	19.3887	1.59756e-57	1.24199e-56	120.126
PI3	550.08	5.98934	0.199403	30.0364	3.28628e-198	2.32483e-196	5.93384	3.78682	601.986	6.19131e-133	1.8933e-131	5.42497	0.453297	15.6	4.30084e-42	1.88383e-41	84.7833
RAC2	1051.26	3.32827	0.110832	30.03	3.98855e-198	2.81363e-196	2.84192	4.77846	378.172	3.11189e-84	2.89406e-83	3.14687	3.54696	25.9496	8.55829e-84	2.36913e-82	180.421
GCNT3	2811.15	5.47692	0.182401	30.0269	4.37897e-198	3.08029e-196	5.49075	6.1643	618.275	1.77376e-136	6.03345e-135	5.8341	3.1815	23.2638	3.24644e-73	5.04143e-72	156.173
RP11-40C6.2	173.389	6.02713	0.200956	29.9923	1.2375e-197	8.65585e-196	5.38141	2.16133	421.841	9.69692e-94	1.12254e-92	7.39512	-0.885798	51.2907	1.3371e-165	3.32015e-161	367.343
BLACAT1	166.59	4.81156	0.160725	29.9366	6.5663e-197	4.54172e-195	4.75007	2.09173	675.381	6.75231e-149	3.21817e-147	4.44487	-0.187624	17.5455	5.46874e-50	3.14849e-49	102.916
TM4SF5	312.275	5.8734	0.196235	29.9304	7.92481e-197	5.46614e-195	5.79513	2.95551	607.808	3.35324e-134	1.07023e-132	5.22609	-0.218404	17.7657	6.89685e-51	4.09017e-50	104.984
PAQR8	721.224	3.13691	0.104822	29.9262	8.9879e-197	6.18223e-195	3.13965	4.18893	760.844	1.76027e-167	1.39202e-165	2.61591	3.1083	23.4029	9.04295e-74	1.44495e-72	157.367
SLC45A3	617.793	3.47412	0.116329	29.8645	5.68578e-196	3.87867e-194	3.48105	3.97114	742.542	1.67923e-163	1.22279e-161	3.05136	2.66243	21.0551	2.58059e-64	2.67106e-63	135.66
TNFSF9	92.0921	5.0555	0.16953	29.8207	2.10588e-195	1.42483e-193	4.49659	1.25517	483.844	3.1146e-107	4.8794e-106	4.42746	-1.11411	21.5769	1.9779e-66	2.23445e-65	140.66
DTL	130.644	3.79988	0.127437	29.8177	2.30114e-195	1.55271e-193	3.78017	1.7607	729.369	1.22837e-160	8.11214e-159	4.08124	0.144157	26.9574	1.11514e-87	3.98418e-86	189.417
SLC16A3	3013.46	3.93648	0.132047	29.8113	2.79034e-195	1.8777e-193	3.94421	6.25272	696.611	1.63158e-153	9.02309e-152	3.74659	4.58383	29.2427	2.6681e-96	1.68579e-94	209.173
ASF1B	205.758	3.60153	0.120932	29.7815	6.78344e-195	4.52794e-193	3.58378	2.39589	737.584	2.00927e-162	1.39754e-160	3.67844	0.94729	25.308	2.69792e-81	6.50017e-80	174.762
TFF3	5741.77	6.19696	0.208147	29.772	9.00464e-195	5.97846e-193	6.14986	7.14024	563.867	1.21188e-124	2.95891e-123	4.30551	3.49005	15.4394	1.90337e-41	8.15718e-41	83.1049
TMSB10	22463.2	2.8161	0.0945949	29.7701	9.51916e-195	6.3032e-193	2.81092	9.12697	764.373	3.00724e-168	2.40105e-166	2.95144	8.39521	29.8907	1.07569e-98	8.11869e-97	214.686
PTPRR	157.241	4.87365	0.163867	29.7414	2.2378e-194	1.47002e-192	4.83898	2.02977	666.454	5.89861e-147	2.66791e-145	4.61711	-0.348152	23.6229	1.20213e-74	2.01553e-73	159.507
CDCA8	200.049	3.07953	0.103668	29.7058	6.46721e-194	4.23713e-192	3.07814	2.35623	772.721	4.60489e-170	3.87607e-168	2.72009	1.273	21.7142	5.5062e-67	6.35337e-66	141.871
PSCA	3313.85	7.23194	0.243494	29.7007	7.52807e-194	4.9192e-192	6.68238	6.39961	421.768	1.00619e-93	1.16262e-92	6.5293	1.60121	13.301	5.34523e-33	1.74733e-32	63.9062
CDC20	318.133	4.42847	0.14911	29.6994	7.80885e-194	5.08928e-192	4.39944	3.00954	684.004	8.99887e-151	4.53247e-149	4.57047	0.957402	24.2166	5.29234e-77	9.87334e-76	164.906
AIM1L	353.048	5.17496	0.174253	29.698	8.14251e-194	5.29284e-192	5.13807	3.17035	634.226	6.02226e-140	2.26918e-138	5.468	0.503941	22.1464	9.90224e-69	1.23933e-67	145.922
LMNB1	507.736	2.32338	0.0783087	29.6695	1.89888e-193	1.22789e-191	2.35205	3.69762	783.517	2.06906e-172	1.91705e-170	2.09082	3.04519	26.2847	4.31924e-85	1.28291e-83	183.398
NUF2	91.1706	3.80133	0.128261	29.6375	4.9145e-193	3.16145e-191	3.75645	1.24754	729.684	1.04957e-160	6.98713e-159	3.95825	-0.345023	26.7622	6.2498e-87	2.10854e-85	187.692
PRR15	480.063	3.17314	0.10708	29.6334	5.55182e-193	3.5622e-191	3.18063	3.6063	747.294	1.5553e-164	1.17029e-162	2.6089	2.47979	16.8864	2.65595e-47	1.38784e-46	96.5566
CLIC1	9895.74	2.23641	0.0755438	29.6041	1.32324e-192	8.46841e-191	2.25314	7.95811	793.275	1.56424e-174	1.5232e-172	2.08407	7.37377	29.0474	1.4202e-95	8.53874e-94	207.469
ABCA12	58.4248	5.65483	0.191068	29.5959	1.68743e-192	1.07438e-190	5.58567	0.648357	690.798	2.99819e-152	1.60103e-150	4.83657	-1.93555	20.6289	1.39412e-62	1.34436e-61	131.84
PRAP1	240.033	6.2794	0.21219	29.5933	1.82064e-192	1.15622e-190	6.186	2.60086	581.561	1.7161e-128	4.57216e-127	5.33072	-0.791026	16.6551	2.31713e-46	1.16873e-45	94.6215
KIFC1	218.364	3.53339	0.119463	29.5773	2.9277e-192	1.85454e-190	3.51807	2.47866	740.356	5.01707e-163	3.53917e-161	3.43125	1.09279	23.1769	7.2234e-73	1.10107e-71	155.399
SAPCD2	236.009	3.69007	0.124769	29.5752	3.11169e-192	1.96607e-190	3.66865	2.58737	729.452	1.17869e-160	7.82565e-159	3.46365	1.09809	22.1213	1.2502e-68	1.55841e-67	145.663
CLRN3	185.847	5.7958	0.195999	29.5705	3.58087e-192	2.25676e-190	5.70681	2.22939	605.148	1.27101e-133	3.95991e-132	5.38057	-0.791392	20.4751	5.89469e-62	5.53806e-61	130.393
GRIN2D	266.2	4.44247	0.150311	29.5551	5.65119e-192	3.53462e-190	4.38926	2.75689	676.654	3.56986e-149	1.72123e-147	4.04968	0.719272	19.6208	1.80015e-58	1.45034e-57	122.35
EPHA4	385.851	2.95839	0.100213	29.5211	1.54536e-191	9.61728e-190	2.99232	3.31528	739.333	8.37135e-163	5.85547e-161	2.50643	2.30346	20.1295	1.51018e-60	1.33165e-59	127.006
COMP	2594.36	4.78955	0.162253	29.519	1.6427e-191	1.01975e-189	4.1877	6.07086	403.662	8.78681e-90	9.24906e-89	4.51147	3.69216	18.2246	9.18926e-53	5.88392e-52	109.102
KCNK1	1047.38	2.99321	0.101439	29.5075	2.30352e-191	1.4264e-189	3.02778	4.73371	766.837	8.75841e-169	7.08404e-167	2.61879	3.69987	23.1079	1.36335e-72	2.05047e-71	154.622
CFL1	17540.2	2.12211	0.0719795	29.4822	4.87621e-191	2.99706e-189	2.13899	8.78436	774.434	1.95257e-170	1.65476e-168	2.18933	8.34748	29.4531	4.43052e-97	3.00585e-95	210.965
PLCD3	1236.54	2.85974	0.0970548	29.4652	8.03909e-191	4.90464e-189	2.88159	4.97048	758.521	5.63152e-167	4.39737e-165	2.36197	4.02741	21.8591	1.42973e-67	1.69216e-66	143.042
MUC4	1521.59	5.12514	0.173999	29.455	1.08737e-190	6.60161e-189	5.15175	5.27515	626.186	3.37592e-138	1.20442e-136	3.74285	2.59701	12.334	2.63889e-29	7.73993e-29	55.2918
ANTXR2	2033.1	2.36471	0.0803669	29.4239	2.71852e-190	1.64643e-188	2.39605	5.69411	763.875	3.85956e-168	3.06188e-166	2.00364	5.00033	21.571	2.09015e-66	2.3559e-65	140.302
DEPDC1B	81.2508	3.92502	0.133506	29.3995	5.56755e-190	3.36369e-188	3.89702	1.10519	712.341	6.19733e-157	3.77171e-155	3.82772	-0.575337	23.7254	4.69866e-75	8.01873e-74	160.443
POC1A	131.16	2.63758	0.0897588	29.3852	8.47972e-190	5.0983e-188	2.61609	1.74193	788.097	2.08929e-173	1.98771e-171	2.25555	0.918072	21.5053	3.85803e-66	4.31331e-65	139.941
HOXB9	120.292	7.08178	0.241086	29.3745	1.16157e-189	6.96687e-188	6.49022	1.60794	489.618	1.72547e-108	2.77675e-107	5.68265	-1.9337	18.426	1.37957e-53	9.09373e-53	111.216
FIBCD1	146.395	7.37437	0.251108	29.3673	1.43503e-189	8.5863e-188	7.20396	1.87873	572.397	1.69047e-126	4.32298e-125	5.73297	-1.90811	20.2042	7.48702e-61	6.69947e-60	127.873
BMP4	701.24	3.38789	0.115421	29.3525	2.21928e-189	1.32468e-187	3.40564	4.15951	720.747	9.21105e-159	5.87968e-157	2.88293	2.88757	19.9624	7.25869e-60	6.22993e-59	125.412
CASC5	125.35	3.54265	0.120746	29.3398	3.22864e-189	1.92255e-187	3.53248	1.71093	724.14	1.68408e-159	1.08335e-157	3.63006	0.276087	24.9373	7.64432e-80	1.6963e-78	171.432
SERTAD4	135.433	3.43693	0.117145	29.339	3.29791e-189	1.9591e-187	3.42462	1.82668	711.921	7.64418e-157	4.6409e-155	3.44324	0.473608	24.7189	5.51624e-79	1.15883e-77	169.46
MELK	143.918	3.86275	0.131663	29.3382	3.37672e-189	2.00113e-187	3.83525	1.89548	704.817	2.68044e-155	1.55509e-153	3.74428	0.260294	21.7231	5.0677e-67	5.86102e-66	141.996
UBE2SP2	30.0686	5.53969	0.189091	29.2964	1.15304e-188	6.78463e-187	5.27462	-0.287446	890.32	1.24783e-195	2.24528e-193	5.38749	-2.47142	41.5098	8.33106e-138	3.44781e-134	303.859
VASP	3907.14	2.42537	0.0827972	29.2929	1.27849e-188	7.48732e-187	2.44898	6.62253	783.357	2.24138e-172	2.06899e-170	2.2019	5.88679	30.0095	3.93495e-99	3.0726e-97	215.628
TBC1D2	659.117	2.59955	0.0887812	29.2805	1.83921e-188	1.07457e-186	2.61223	4.06222	760.413	2.18383e-167	1.72148e-165	2.23159	3.26746	25.006	4.10987e-80	9.24385e-79	171.937
HENMT1	192.958	2.65981	0.0909032	29.2598	3.36651e-188	1.9623e-186	2.65445	2.30243	756.602	1.47201e-166	1.13514e-164	2.40323	1.4614	22.4648	5.17254e-70	6.90533e-69	148.814
KIF14	76.7947	3.82579	0.130816	29.2455	5.12048e-188	2.9569e-186	3.80974	1.02363	708.406	4.44335e-156	2.63954e-154	3.87458	-0.605843	22.8694	1.22907e-71	1.76004e-70	152.602
FTH1P7	153.468	2.54763	0.0872019	29.2153	1.23848e-187	7.13518e-186	2.54953	1.98142	770.84	1.18052e-169	9.61099e-168	2.48118	1.19669	27.7265	1.30561e-90	5.57038e-89	196.153
IL1RN	846.208	4.55818	0.156142	29.1924	2.4199e-187	1.38773e-185	4.01406	4.45555	413.948	5.06656e-92	5.62144e-91	4.5716	2.25288	20.2871	3.43976e-61	3.11839e-60	128.541
SLC9A2	152.647	6.01488	0.20605	29.1914	2.49099e-187	1.4252e-185	5.96293	1.97413	592.365	7.66491e-131	2.20797e-129	5.45879	-1.20188	19.3697	1.911e-57	1.47826e-56	120.053
CDKN3	95.4632	3.38687	0.116028	29.1902	2.58377e-187	1.47489e-185	3.34816	1.3114	733.187	1.81678e-161	1.22588e-159	3.41416	-0.0149083	25.9651	7.45495e-84	2.0776e-82	180.638
ITGA3	8202.28	2.80812	0.0962316	29.1808	3.39446e-187	1.93321e-185	2.84318	7.70639	728.386	2.00936e-160	1.31301e-158	2.45069	6.77938	25.8019	3.20782e-83	8.58333e-82	179.02
ZNF488	59.9879	4.72606	0.162363	29.1079	2.85259e-186	1.60618e-184	4.67412	0.679098	673.592	1.65403e-148	7.79342e-147	4.21011	-1.45428	21.5903	1.74544e-66	1.97634e-65	140.787
SPOCD1	119.822	4.38808	0.15078	29.1026	3.32343e-186	1.86284e-184	3.54001	1.6768	324.697	1.37374e-72	9.67148e-72	4.1291	-0.362991	20.6406	1.24976e-62	1.2075e-61	131.929
TNFRSF21	3903.74	2.65017	0.0910962	29.092	4.53228e-186	2.53471e-184	2.68632	6.63452	739.76	6.75908e-163	4.75452e-161	2.49809	5.76512	29.409	6.45308e-97	4.29588e-95	210.535
RP11-350J20.12	40.819	7.19056	0.24717	29.0916	4.59058e-186	2.56154e-184	6.43064	0.096282	568.272	1.33404e-125	3.34265e-124	5.39292	-2.72678	24.6818	7.72546e-79	1.61338e-77	169.093
GNA15	484.814	3.71497	0.12772	29.0868	5.27381e-186	2.93619e-184	3.70353	3.6201	692.875	1.05941e-152	5.73122e-151	3.73852	2.09653	24.8231	2.1477e-79	4.6093e-78	170.37
DLGAP5	144.713	4.7213	0.162322	29.086	5.39411e-186	2.99645e-184	4.69694	1.91061	640.776	2.26527e-141	8.83028e-140	5.32059	-0.417894	27.0545	4.73668e-88	1.7322e-86	190.257
SLPI	3331.85	4.16785	0.143321	29.0805	6.33974e-186	3.51389e-184	4.14128	6.36545	654.657	2.16919e-144	9.31888e-143	3.74043	4.51503	23.0266	2.88327e-72	4.25652e-71	153.878
S100A11	12261.9	3.11612	0.107157	29.0799	6.4476e-186	3.56571e-184	3.1227	8.26789	708.506	4.22704e-156	2.51706e-154	3.05993	7.21148	27.2494	8.53075e-89	3.23895e-87	191.873
LRRC15	566.749	6.52085	0.224338	29.067	9.38004e-186	5.16443e-184	6.48909	3.85294	532.162	9.56147e-118	1.94927e-116	6.71102	-0.0318891	19.8265	2.60285e-59	2.18054e-58	124.316
CCDC109B	372.091	2.55837	0.0880214	29.0653	9.87048e-186	5.42243e-184	2.56477	3.24581	741.064	3.51825e-163	2.52491e-161	2.50285	2.47271	29.3031	1.59265e-96	1.02987e-94	209.724
SYTL2	1041.15	2.81234	0.0967635	29.064	1.02302e-185	5.60764e-184	2.83849	4.72956	730.777	6.06967e-161	4.06242e-159	2.42017	3.81337	23.0646	2.0319e-72	3.02845e-71	154.21
DAPP1	231.267	3.93828	0.135516	29.0613	1.10702e-185	6.0547e-184	3.38382	2.61267	385.327	8.61573e-86	8.2793e-85	4.1294	0.880792	22.9772	4.54398e-72	6.62156e-71	153.574
MROH6	660.186	3.59289	0.12369	29.0474	1.6579e-185	9.00818e-184	3.60489	4.06818	696.53	1.69894e-153	9.37473e-152	2.8696	2.642	16.9255	1.84145e-47	9.67522e-47	96.9188
ASPM	197.583	4.03803	0.139074	29.0352	2.36865e-185	1.28419e-183	4.03103	2.35624	676.228	4.41748e-149	2.1135e-147	4.2656	0.551942	23.1246	1.16925e-72	1.76283e-71	154.935
TSPAN8	6459.17	3.75902	0.129475	29.0329	2.53056e-185	1.36898e-183	3.78269	7.35458	678.957	1.12655e-149	5.53926e-148	3.01377	5.81205	18.4935	7.30853e-54	4.86667e-53	111.466
DUSP6	1985.38	2.24217	0.0772344	29.0307	2.69556e-185	1.45507e-183	2.2735	5.65334	772.676	4.70774e-170	3.94925e-168	2.02072	5.01632	30.1989	7.95472e-100	6.69572e-98	217.229
CLIC3	454.649	5.24573	0.180777	29.0177	3.93548e-185	2.11978e-183	5.20492	3.52222	598.994	2.77081e-132	8.26948e-131	4.86808	0.741087	17.2871	6.19429e-49	3.42842e-48	100.463
XDH	399.135	3.97526	0.137152	28.9843	1.03896e-184	5.54804e-183	3.98257	3.35434	670.274	8.70923e-148	4.03468e-146	3.27247	1.63414	14.9277	2.12998e-39	8.53883e-39	78.4952
ATP10A	319.419	2.94646	0.101667	28.9814	1.13024e-184	6.02253e-183	2.34075	3.11269	275.753	6.32567e-62	3.51472e-61	2.72162	2.05428	18.0252	6.00217e-52	3.72321e-51	107.269
FSCN1	2144.66	3.14119	0.108399	28.9781	1.24394e-184	6.6142e-183	3.15277	5.76273	711.675	8.6486e-157	5.23789e-155	2.81313	4.62848	27.3807	2.6924e-89	1.0545e-87	193.027
CLDN18	6592.51	7.0199	0.242688	28.9256	5.68608e-184	2.99769e-182	7.02387	7.38561	495.258	1.02262e-109	1.7065e-108	6.08931	2.66998	12.213	7.51797e-29	2.17625e-28	54.3423
CDH17	953.923	5.89709	0.204041	28.9015	1.14314e-183	5.97584e-182	5.91781	4.60374	561.769	3.46532e-124	8.38669e-123	5.24477	1.12431	15.525	8.61453e-42	3.73833e-41	84.0606
AP1S3	228.616	2.63353	0.0912605	28.8573	4.10757e-183	2.12933e-181	2.66867	2.56622	728.089	2.33215e-160	1.51596e-158	2.23305	1.71885	18.5122	6.13073e-54	4.08567e-53	111.855
HRASLS2	68.0591	6.4468	0.22374	28.8138	1.44008e-182	7.38814e-181	6.37204	0.839644	648.282	5.28164e-143	2.16417e-141	5.16926	-2.19135	21.3165	2.24397e-65	2.4205e-64	138.244
IQGAP3	423.942	4.36603	0.151622	28.7955	2.44397e-182	1.24869e-180	4.35172	3.43361	637.596	1.11399e-140	4.26216e-139	4.54166	1.36142	21.1239	1.35737e-64	1.41379e-63	136.395
SPARC	47171.7	3.54075	0.122972	28.7932	2.6067e-182	1.3291e-180	3.5583	10.2304	641.661	1.45455e-141	5.70582e-140	4.29602	9.22887	29.7802	2.74395e-98	2.02783e-96	213.775
GPR137B	407.267	2.18111	0.0757548	28.7917	2.72418e-182	1.38615e-180	2.19958	3.37958	729.036	1.45141e-160	9.5344e-159	2.01157	2.79586	27.7663	9.22716e-91	4.0126e-89	196.453
SLC24A3	350.695	3.02486	0.105084	28.7851	3.2935e-182	1.67241e-180	3.03384	3.16794	702.497	8.56354e-155	4.91088e-153	2.86343	2.1068	25.3228	2.3627e-81	5.70702e-80	174.859
HMGA1	4899.11	2.84699	0.0989168	28.7817	3.63817e-182	1.84366e-180	2.86734	6.94305	735.256	6.44506e-162	4.42092e-160	2.31531	5.97249	25.5452	3.19956e-82	8.09045e-81	176.702
INPP4B	1016.69	2.52872	0.0878734	28.7768	4.18225e-182	2.11506e-180	2.56799	4.7044	718.864	2.36426e-158	1.49382e-156	2.17835	3.92617	22.9524	5.71364e-72	8.28712e-71	153.161
PTGES	734.934	4.45549	0.15484	28.7748	4.43535e-182	2.2385e-180	4.44688	4.21669	631.065	2.9315e-139	1.08e-137	3.94519	2.09814	18.6366	1.89966e-54	1.29128e-53	113.042
HOXB6	267.268	3.35439	0.116808	28.717	2.33848e-181	1.1707e-179	3.3331	2.75834	697.368	1.11707e-153	6.21927e-152	2.77814	1.49479	17.9456	1.26983e-51	7.75483e-51	106.563
IGHG4	6953.15	7.4466	0.259391	28.708	3.02908e-181	1.51035e-179	6.70145	7.46428	366.403	1.13604e-81	9.83578e-81	6.99426	2.24772	15.8056	6.38383e-43	2.87481e-42	86.6504
TOP2A	796.045	4.4023	0.153474	28.6843	5.99507e-181	2.97133e-179	4.4198	4.34926	630.53	3.83401e-139	1.40624e-137	4.9974	2.22762	27.9404	2.02283e-91	9.25025e-90	198.013
ANXA8L1	340.028	5.48263	0.191265	28.6651	1.03894e-180	5.12879e-179	5.43366	3.12407	575.216	4.11721e-127	1.06494e-125	4.53201	0.166036	13.9384	1.75593e-35	6.17934e-35	69.63
CAPN5	2524.61	2.9676	0.103535	28.6629	1.10818e-180	5.45979e-179	2.99491	6.00195	710.913	1.26686e-156	7.63529e-155	2.52139	4.96239	23.6109	1.34102e-74	2.23933e-73	159.177
TRIM15	266.907	6.19314	0.216139	28.6535	1.44879e-180	7.12375e-179	6.12664	2.75611	545.221	1.37944e-120	3.05284e-119	6.41176	-0.640624	20.1272	1.54347e-60	1.35995e-59	127.14
NCAPH	109.494	3.72057	0.129851	28.6526	1.48747e-180	7.29949e-179	3.6949	1.51119	681.55	3.07473e-150	1.53003e-148	3.97195	-0.0835441	26.5509	4.05935e-86	1.28897e-84	185.832
HMMR	127.072	3.49983	0.122244	28.6299	2.85336e-180	1.39747e-178	3.4864	1.72893	692.816	1.09098e-152	5.88913e-151	3.50738	0.30592	23.6357	1.06873e-74	1.79551e-73	159.618
SHH	310.44	5.07139	0.177138	28.6297	2.8696e-180	1.40266e-178	5.03898	2.98423	591.994	9.22782e-131	2.65204e-129	5.02677	0.334669	18.3586	2.60414e-53	1.69409e-52	110.524
AGR2	11644.1	5.10871	0.178536	28.6144	4.44485e-180	2.16412e-178	5.11509	8.18107	581.984	1.38836e-128	3.70693e-127	4.80733	5.51139	22.6631	8.25696e-71	1.13968e-69	150.528
KLF5	3093.27	3.06187	0.107048	28.6026	6.23177e-180	3.02229e-178	3.10014	6.29998	705.181	2.2342e-155	1.29924e-153	2.65305	5.18053	22.3341	1.7357e-69	2.24944e-68	147.41
OAS1	1210.2	3.61205	0.126408	28.5746	1.38926e-179	6.71143e-178	3.61782	4.93814	662.458	4.36244e-146	1.93435e-144	3.48192	3.47714	27.0569	4.63726e-88	1.69835e-86	190.245
ANKS4B	206.539	4.51641	0.158068	28.5726	1.47283e-179	7.10135e-178	4.49191	2.412	625.382	5.04938e-138	1.79629e-136	3.99633	0.24371	16.3686	3.37206e-45	1.63602e-44	91.9038
MUC16	1163.34	6.92241	0.242476	28.5488	2.90512e-179	1.3926e-177	6.9152	4.90287	491.735	5.97592e-109	9.7049e-108	5.82304	0.402398	12.135	1.47396e-28	4.22924e-28	53.7743
PPARG	644.814	3.40806	0.119437	28.5343	4.39318e-179	2.09783e-177	3.42187	4.03717	681.533	3.10092e-150	1.53998e-148	2.89661	2.71464	19.0822	2.85981e-56	2.10655e-55	117.158
ANXA2	33908.8	2.61498	0.0917296	28.5074	9.47473e-179	4.51568e-177	2.64122	9.74598	691.003	2.70546e-152	1.44783e-150	2.96866	9.26192	25.1172	1.50645e-80	3.48617e-79	172.969
LPAR5	260.074	3.40232	0.119452	28.4826	1.92263e-178	9.02473e-177	3.39864	2.73417	678.307	1.55973e-149	7.63898e-148	3.42344	1.38657	24.4103	9.08662e-78	1.77103e-76	166.649
ARNTL2	627.555	2.97667	0.104513	28.4813	1.99907e-178	9.36585e-177	3.00273	4.00585	692.896	1.0485e-152	5.68459e-151	2.80415	2.95379	25.2495	4.57115e-81	1.09141e-79	174.162
ECM1	1889.7	3.79424	0.133227	28.4795	2.10489e-178	9.84302e-177	3.78764	5.56617	648.774	4.129e-143	1.70029e-141	3.2466	3.97743	24.4628	5.63546e-78	1.11413e-76	167.017
SLC7A4	90.2	4.10865	0.144274	28.4781	2.185e-178	1.01984e-176	4.03753	1.22483	654.148	2.7995e-144	1.19646e-142	3.68903	-0.568338	20.5158	4.02698e-62	3.81511e-61	130.767
RAD51	88.9855	3.10477	0.109128	28.4506	4.78771e-178	2.22629e-176	3.07042	1.21199	709.027	3.25661e-156	1.95326e-154	2.93701	0.0730768	22.8078	2.16943e-71	3.07122e-70	152.028
LY6E	7316.93	3.21445	0.112999	28.4468	5.33359e-178	2.47087e-176	3.22013	7.52124	677.517	2.3174e-149	1.1283e-147	2.80919	6.34354	24.4903	4.38897e-78	8.76769e-77	167.195
KLK8	203.471	7.80906	0.274841	28.413	1.39726e-177	6.42508e-176	6.31594	2.37584	299.625	3.97525e-67	2.46959e-66	5.7904	-1.94597	14.9117	2.4672e-39	9.87159e-39	78.5494
GATA3	142.531	4.19986	0.147924	28.3921	2.53255e-177	1.16025e-175	4.17936	1.89214	638.219	8.15226e-141	3.13357e-139	3.99479	-0.0255932	21.8447	1.63389e-67	1.93103e-66	143.131
COL5A2	8585.16	3.85814	0.13608	28.3521	7.88906e-177	3.58779e-175	3.87856	7.77886	624.882	6.48523e-138	2.29394e-136	3.83269	6.13436	28.9618	2.96057e-95	1.74618e-93	206.741
UBXN10	319.462	2.75517	0.0973166	28.3114	2.50332e-176	1.13018e-174	2.76538	3.02806	703.069	6.43028e-155	3.69607e-153	2.28052	2.125	18.7805	4.89805e-55	3.41543e-54	114.347
SULT1B1	605.823	5.24566	0.185354	28.3008	3.377e-176	1.52186e-174	5.24837	3.97094	567.461	2.00251e-125	4.9774e-124	4.38009	1.0824	14.0473	6.55928e-36	2.34317e-35	70.5579
TRIM14	827.628	2.39513	0.0846645	28.2897	4.62323e-176	2.0797e-174	2.41923	4.39808	708.69	3.85561e-156	2.30141e-154	2.35065	3.70125	31.2335	1.38442e-103	1.5555e-101	225.928
UHRF1	263.852	3.57059	0.126217	28.2894	4.66888e-176	2.09644e-174	3.56106	2.76132	665.816	8.1202e-147	3.6594e-145	3.67133	1.29085	23.1524	9.04901e-73	1.37177e-71	155.17
CCL18	481.658	6.45175	0.228063	28.2893	4.68077e-176	2.09798e-174	4.74026	3.65027	226.978	2.71898e-51	1.18427e-50	7.03293	-0.171531	21.8829	1.14546e-67	1.36596e-66	143.494
ANXA1	5511.34	3.17712	0.112418	28.2617	1.02182e-175	4.56344e-174	3.20221	7.13273	664.051	1.96509e-146	8.79194e-145	2.87921	5.9418	25.69	8.735e-83	2.27357e-81	178.015
DKK3	2347.15	2.57047	0.0910125	28.2431	1.73161e-175	7.71948e-174	2.59441	5.90186	688.605	8.98756e-152	4.68845e-150	2.37639	5.08185	27.5136	8.40066e-90	3.43652e-88	194.163
APOBEC1	83.7339	8.08497	0.286412	28.2285	2.61714e-175	1.16463e-173	7.52704	1.09779	499.448	1.25327e-110	2.13883e-109	5.41102	-2.63693	20.3067	2.86148e-61	2.59983e-60	128.834
KIF18A	59.3047	3.12206	0.110645	28.2169	3.6246e-175	1.61006e-173	3.08718	0.665078	690.58	3.34401e-152	1.77806e-150	2.8258	-0.490888	21.0172	3.67902e-64	3.7812e-63	135.444
HOXA3	164.248	3.03838	0.107684	28.2158	3.74352e-175	1.65992e-173	3.02147	2.08034	687.425	1.62294e-151	8.36084e-150	2.59803	0.992128	19.4853	6.43971e-58	5.07956e-57	121.052
FRMD5	124.432	3.59171	0.127367	28.1998	5.8799e-175	2.59793e-173	3.57357	1.69888	653.88	3.20103e-144	1.36337e-142	3.68023	0.186497	25.1664	9.66261e-81	2.26138e-79	173.494
SH3PXD2A-AS1	76.2163	6.04872	0.214518	28.1968	6.399e-175	2.82227e-173	5.96122	0.989073	599.457	2.19749e-132	6.58214e-131	5.34334	-1.96759	22.4886	4.15045e-70	5.55579e-69	149.094
PROC	84.0008	3.78817	0.134395	28.1868	8.48699e-175	3.73653e-173	3.72079	1.13018	658.273	3.54747e-145	1.55631e-143	3.32703	-0.437851	21.385	1.18446e-65	1.29736e-64	138.868
HOXB5	175.153	3.11247	0.11048	28.1722	1.28054e-174	5.61787e-173	3.07428	2.14847	693.977	6.1016e-153	3.32256e-151	2.62549	1.03766	19.1035	2.34125e-56	1.72996e-55	117.465
HTR1D	90.346	5.24227	0.186102	28.1688	1.41062e-174	6.17764e-173	5.19648	1.25562	591.953	9.42083e-131	2.70438e-129	5.45717	-1.36068	25.7073	7.4803e-83	1.95314e-81	178.316
LAMA4	1902.39	2.8271	0.100405	28.1568	1.97597e-174	8.63828e-173	2.85222	5.60131	679.041	1.07986e-149	5.32024e-148	2.69577	4.63777	28.6905	3.05309e-94	1.68469e-92	204.405
PLAU	3411.9	3.91136	0.13894	28.1514	2.30182e-174	1.00275e-172	3.93367	6.43956	624.658	7.25481e-138	2.56251e-136	3.63791	4.71295	25.6574	1.16978e-82	3.01941e-81	177.776
ETV1	568.132	2.8205	0.100249	28.135	3.65781e-174	1.59067e-172	2.8303	3.85646	677.085	2.87582e-149	1.392e-147	2.5542	2.91973	25.4531	7.32018e-82	1.82497e-80	175.988
GJB2	1388.72	4.588	0.163085	28.1325	3.9229e-174	1.70296e-172	4.61641	5.14262	601.305	8.7103e-133	2.64408e-131	4.63031	2.82807	18.6589	1.5396e-54	1.05056e-53	113.233
KIF20A	164.245	4.27999	0.152243	28.113	6.79775e-174	2.93556e-172	4.26175	2.09141	617.143	3.12692e-136	1.05639e-134	4.86324	0.0389911	26.575	3.2798e-86	1.05085e-84	186.044
KIF26B	789.413	3.77041	0.134188	28.0979	1.0405e-173	4.47777e-172	3.77585	4.3382	625.674	4.36275e-138	1.55425e-136	3.91795	2.73138	26.8176	3.83153e-87	1.31957e-85	188.167
LCK	306.696	3.59754	0.128042	28.0966	1.07913e-173	4.63598e-172	3.23829	2.99285	437.428	3.92788e-97	4.93339e-96	3.28237	1.52325	20.5062	4.40485e-62	4.16515e-61	130.6
MKI67	951.052	4.34739	0.154873	28.0706	2.23786e-173	9.54783e-172	4.35864	4.59736	607.173	4.60975e-134	1.46374e-132	4.85548	2.49482	26.717	9.32499e-87	3.11221e-85	187.295
STON2	151.878	2.55573	0.0910576	28.0672	2.46306e-173	1.04906e-171	2.56285	1.97258	697.508	1.04136e-153	5.82386e-152	2.34664	1.15875	23.4209	7.66607e-74	1.22969e-72	157.626
SEMA3A	174.043	3.53913	0.126119	28.0618	2.86505e-173	1.2161e-171	3.54284	2.18574	646.142	1.54192e-142	6.2256e-141	3.38409	0.720121	22.2595	3.46832e-69	4.44385e-68	146.953
AGMO	80.9904	5.49533	0.195833	28.0613	2.90647e-173	1.22948e-171	5.44191	1.09208	591.21	1.36664e-130	3.89609e-129	4.78521	-1.6458	19.9184	1.09731e-59	9.33443e-59	125.198
FAM83D	225.518	4.47112	0.159459	28.0393	5.40041e-173	2.2767e-171	4.45282	2.5432	605.691	9.68094e-134	3.03137e-132	4.01657	0.366079	21.1326	1.25109e-64	1.30693e-63	136.501
ITGA11	1257.06	3.80059	0.135584	28.0312	6.76648e-173	2.84777e-171	3.82146	5.00665	624.329	8.55334e-138	3.01259e-136	3.30617	3.37862	20.6265	1.42564e-62	1.37423e-61	131.621
ESPN	180.188	4.43656	0.158334	28.0202	9.23175e-173	3.87874e-171	4.40597	2.21103	606.367	6.90156e-134	2.17478e-132	3.54602	0.107401	15.7309	1.2767e-42	5.69358e-42	85.994
CTD-2015G9.2	120.287	6.42246	0.22932	28.0065	1.3523e-172	5.67212e-171	6.36213	1.64508	544.426	2.05405e-120	4.51364e-119	5.77097	-1.71073	21.1553	1.0121e-64	1.06399e-63	136.744
MARVELD1	1651.29	2.34198	0.0836291	28.0043	1.43884e-172	6.02492e-171	2.35654	5.38848	689.391	6.06236e-152	3.18929e-150	2.17087	4.70137	28.5345	1.17189e-93	6.25792e-92	203.042
RARRES3	1181.21	3.4688	0.123892	27.9985	1.69226e-172	7.07416e-171	3.47832	4.90573	644.07	4.35264e-142	1.73484e-140	3.23535	3.53158	25.046	2.86398e-80	6.48864e-79	172.316
COL11A1	2829.37	6.0494	0.216293	27.9685	3.9259e-172	1.62744e-170	5.31241	6.19773	357.39	1.04215e-79	8.63163e-79	5.96722	2.41249	16.427	1.95346e-45	9.54849e-45	92.3876
NREP	1278.19	2.68766	0.0963193	27.9037	2.40869e-171	9.90234e-170	2.70719	5.02592	671.429	4.8844e-148	2.27551e-146	2.61005	4.15476	29.7053	5.1807e-98	3.7725e-96	213.095
CDR2L	1027.67	2.37957	0.0852789	27.9033	2.43032e-171	9.97475e-170	2.39856	4.70356	697.231	1.19637e-153	6.64581e-152	2.11873	4.00682	24.5908	1.76288e-78	3.59689e-77	168.137
CD79A	374.315	5.47079	0.196399	27.8555	9.23859e-171	3.74842e-169	2.63081	3.3977	92.8227	5.71957e-22	1.26987e-21	3.74024	0.224891	13.3919	2.37688e-33	7.86097e-33	64.7357
ALDH3A1	276.838	4.96597	0.178328	27.8474	1.15745e-170	4.68089e-169	4.93351	2.81911	565.09	6.56735e-125	1.6194e-123	3.80351	0.230539	13.8465	4.02535e-35	1.40246e-34	68.795
GPR68	238.22	3.22334	0.115793	27.8372	1.5404e-170	6.21947e-169	3.21238	2.61119	657.302	5.76759e-145	2.51255e-143	3.06008	1.40428	21.892	1.05231e-67	1.25806e-66	143.52
ABCG1	738.707	2.36545	0.0851082	27.7935	5.20361e-170	2.09758e-168	2.38506	4.22975	694.055	5.86881e-153	3.20988e-151	2.15952	3.53966	27.0414	5.31807e-88	1.93343e-86	190.071
KYNU	310.429	3.80565	0.136965	27.7855	6.48494e-170	2.60984e-168	3.79544	2.98678	627.661	1.61285e-138	5.79577e-137	4.00515	1.33039	23.1528	9.01971e-73	1.36816e-71	155.176
CXCL5	2101.25	6.5434	0.235623	27.7707	9.8069e-170	3.94037e-168	6.52471	5.74132	477.497	7.48889e-106	1.13596e-104	6.38413	1.45256	14.4285	2.05407e-37	7.73031e-37	74.0303
IL2RG	1418.52	4.4205	0.159344	27.7418	2.18697e-169	8.74471e-168	4.41775	5.16028	587.069	1.08769e-129	3.00761e-128	4.67319	3.00731	25.9276	1.04256e-83	2.86052e-82	180.275
CKAP2L	81.0307	4.24464	0.153028	27.7376	2.45784e-169	9.81199e-168	4.22064	1.09961	614.313	1.29046e-135	4.28387e-134	4.72873	-0.911222	27.542	6.55506e-90	2.69932e-88	194.507
CENPW	92.7492	2.79201	0.100664	27.7359	2.57812e-169	1.02756e-167	2.74107	1.25809	687.129	1.88215e-151	9.6561e-150	2.46648	0.314891	22.4046	9.03308e-70	1.19119e-68	148.303
VSTM2L	1005.94	4.32484	0.156047	27.715	4.60873e-169	1.82811e-167	4.33123	4.68259	584.115	4.77406e-129	1.29699e-127	3.35548	2.60534	15.594	4.54595e-42	1.98873e-41	84.5553
TRIM16	996.933	2.52032	0.0909848	27.7004	6.89696e-169	2.71839e-167	2.5434	4.65753	694.333	5.10533e-153	2.79846e-151	2.05145	3.8745	22.383	1.10327e-69	1.44871e-68	147.899
TRBC2	554.113	4.00036	0.14459	27.6668	1.75144e-168	6.87045e-167	3.46278	3.84347	369.844	2.02341e-82	1.79057e-81	3.634	2.05473	18.8272	3.15658e-55	2.22547e-54	114.827
HK2	1812.96	3.35799	0.121398	27.6609	2.06557e-168	8.05184e-167	3.39246	5.5275	647.302	8.62903e-143	3.50683e-141	2.97443	4.18735	21.2118	5.96852e-65	6.31462e-64	137.029
RP5-884M6.1	35.7062	7.40755	0.267819	27.6588	2.18951e-168	8.5216e-167	5.96271	-0.0299526	335.58	5.85531e-75	4.32718e-74	5.01581	-3.05458	20.9124	9.81085e-64	9.91507e-63	134.482
TACC3	707.562	2.55199	0.092271	27.6575	2.26494e-168	8.80138e-167	2.55663	4.15259	697.439	1.07793e-153	6.01483e-152	2.19458	3.38986	24.1323	1.14103e-76	2.09563e-75	164.007
LGALS3	7356.65	2.63769	0.0953781	27.6551	2.42375e-168	9.40379e-167	2.66221	7.53708	678.905	1.15649e-149	5.67527e-148	2.33149	6.68187	23.0416	2.51084e-72	3.72441e-71	153.942
SFTA2	361.28	4.42052	0.159902	27.6453	3.18279e-168	1.23294e-166	4.39993	3.20034	584.149	4.69404e-129	1.27665e-127	3.50167	1.06928	11.8876	1.23196e-27	3.43447e-27	51.5861
CDCA2	59.0499	3.72544	0.13476	27.645	3.20679e-168	1.24031e-166	3.67732	0.64911	647.742	6.9229e-143	2.82734e-141	3.88541	-0.958394	25.0853	2.00914e-80	4.6023e-79	172.756
SYNDIG1	168.336	3.87896	0.140362	27.6355	4.16941e-168	1.61012e-166	3.86233	2.12748	615.611	6.73679e-136	2.25143e-134	3.71943	0.406154	22.7511	3.66166e-71	5.11953e-70	151.501
OAS2	1165	3.62377	0.131176	27.6253	5.53491e-168	2.13412e-166	3.6474	4.8913	623.967	1.02573e-137	3.59743e-136	3.5034	3.3687	23.4964	3.83442e-74	6.24344e-73	158.24
S100A14	3258.1	4.04336	0.146365	27.6252	5.54414e-168	2.13437e-166	4.02025	6.32986	601.359	8.475e-133	2.5758e-131	3.14647	4.50619	15.7594	9.80127e-43	4.39068e-42	85.9416
KIAA0101	170.606	2.89956	0.1051	27.5887	1.51967e-167	5.82328e-166	2.89687	2.12748	676.61	3.64892e-149	1.75594e-147	2.60093	1.10679	20.1055	1.89164e-60	1.65976e-59	126.861
RGS10	417.456	2.80546	0.10176	27.5695	2.58538e-167	9.83118e-166	2.79061	3.39535	662.085	5.25994e-146	2.32401e-144	2.78652	2.46362	29.0289	1.66478e-95	9.98508e-94	207.384
TPM4	14267.3	2.29983	0.0834276	27.5668	2.78514e-167	1.05423e-165	2.32409	8.50102	649.76	2.51986e-143	1.04458e-141	2.39616	7.90469	27.2496	8.51297e-89	3.23714e-87	191.891
KIF15	86.1553	2.97256	0.108074	27.5048	1.53714e-166	5.79192e-165	2.94349	1.17684	662.605	4.0532e-146	1.80045e-144	2.84611	0.0813924	23.1688	7.78331e-73	1.18496e-71	155.345
PPP1R14C	198.45	3.42895	0.124707	27.4961	1.95251e-166	7.34587e-165	3.41798	2.3554	627.677	1.59995e-138	5.75775e-137	3.16337	0.97263	19.4294	1.08937e-57	8.52244e-57	120.535
CDC25C	42.828	4.20038	0.152814	27.4869	2.51914e-166	9.46336e-165	4.14915	0.197475	648.546	4.62691e-143	1.89902e-141	4.35948	-1.66725	25.7468	5.25068e-83	1.38702e-81	178.66
IGHG1	31954.7	5.87712	0.213907	27.4751	3.48188e-166	1.30602e-164	5.35977	9.66972	382.193	4.14579e-85	3.91721e-84	5.90244	6.19534	21.3907	1.12348e-65	1.23166e-64	138.751
EFNA3	246.789	3.37349	0.122791	27.4735	3.64388e-166	1.36472e-164	3.32521	2.61032	651.049	1.321e-143	5.54085e-142	2.40582	1.32405	15.7218	1.38915e-42	6.18725e-42	85.8129
TTYH3	3017.75	2.38771	0.0869908	27.4478	7.37436e-166	2.75357e-164	2.40316	6.25306	670.382	8.25111e-148	3.83677e-146	2.16596	5.51401	27.6118	3.55732e-90	1.48457e-88	195.009
GAPDH	46339.7	2.33932	0.0852598	27.4376	9.77366e-166	3.63853e-164	2.35826	10.1859	649.956	2.284e-143	9.49984e-142	2.80665	9.90028	28.1005	5.02672e-92	2.40962e-90	199.381
NUSAP1	324.36	2.93032	0.106818	27.4328	1.11408e-165	4.14128e-164	2.94685	3.05513	650.186	2.03511e-143	8.49306e-142	2.84011	2.00006	22.5466	2.42672e-70	3.28201e-69	149.548
GPX2	4987.41	4.31773	0.157396	27.4323	1.13053e-165	4.19616e-164	4.31413	6.96568	571.878	2.19204e-126	5.57691e-125	4.09667	4.89194	21.8672	1.32588e-67	1.57149e-66	143.15
COTL1	3920.05	2.54906	0.0929302	27.4298	1.21e-165	4.48441e-164	2.57035	6.63102	667.4	3.67366e-147	1.67377e-145	2.49184	5.79727	29.3261	1.30839e-96	8.52718e-95	209.828
PLK1	338.229	2.50871	0.0914694	27.4268	1.31569e-165	4.86161e-164	2.52155	3.10412	683.419	1.20594e-150	6.06167e-149	2.02689	2.32499	17.8129	4.42601e-51	2.64633e-50	105.232
ANTXR1	4806.27	3.60663	0.131515	27.4236	1.43372e-165	5.28199e-164	3.62724	6.94602	599.142	2.57306e-132	7.68853e-131	3.48702	5.41913	27.3473	3.60953e-89	1.39826e-87	192.734
SLC6A6	2178.14	2.67397	0.0975247	27.4184	1.65559e-165	6.08136e-164	2.70875	5.80311	647.397	8.22646e-143	3.34871e-141	2.55402	4.90144	26.7701	5.82887e-87	1.97458e-85	187.634
CST6	248.926	5.39374	0.196843	27.4012	2.65515e-165	9.73855e-164	5.34449	2.67263	528.131	7.20289e-117	1.44471e-115	4.4545	-0.314175	14.4893	1.17987e-37	4.48519e-37	74.6347
BAIAP2L2	704.696	3.60182	0.131467	27.3972	2.9583e-165	1.08026e-163	3.58738	4.13911	621.319	3.86351e-137	1.33428e-135	2.85386	2.66414	16.0999	4.13092e-44	1.92737e-43	89.2184
ANXA13	329.981	5.743	0.209623	27.3968	2.99728e-165	1.09288e-163	5.70899	3.09394	508.446	1.38119e-112	2.48345e-111	5.09563	-0.255046	17.944	1.28897e-51	7.86976e-51	106.656
GBP2	1896.67	2.61406	0.0954315	27.392	3.41721e-165	1.24418e-163	2.63285	5.59196	651.854	8.82696e-144	3.70867e-142	2.48056	4.73713	26.5147	5.59811e-86	1.76181e-84	185.376
CENPM	111.823	3.83907	0.140197	27.3834	4.32741e-165	1.57096e-163	3.7684	1.50521	621.94	2.82979e-137	9.8275e-136	3.65262	-0.154648	21.3112	2.35965e-65	2.54418e-64	138.176
DPYSL3	4059.58	3.41631	0.124776	27.3796	4.80532e-165	1.74191e-163	3.42701	6.69038	611.534	5.18946e-135	1.70434e-133	3.47944	5.30413	30.9516	1.44493e-102	1.48876e-100	223.569
IFI27L2	633.577	2.36748	0.0864692	27.3795	4.81828e-165	1.74406e-163	2.35288	3.9855	694	6.03099e-153	3.29133e-151	2.1179	3.31461	26.7731	5.67857e-87	1.92629e-85	187.714
RTKN2	151.816	3.84956	0.140876	27.3258	2.09549e-164	7.54104e-163	3.81959	1.9717	607.334	4.25256e-134	1.35553e-132	3.88189	0.26496	23.198	5.94629e-73	9.11434e-72	155.612
TTK	84.1948	3.3903	0.124113	27.3163	2.71723e-164	9.73617e-163	3.36106	1.14222	636.194	2.24751e-140	8.52028e-139	3.30238	-0.242298	21.7974	2.53899e-67	2.98512e-66	142.695
CGB5	348.945	10.6206	0.388833	27.3141	2.88382e-164	1.03182e-162	10.4517	3.71861	348.705	8.11166e-78	6.4249e-77	5.90902	-2.5988	14.5403	7.40899e-38	2.83383e-37	75.1769
HOXC4	62.8472	3.20097	0.117222	27.307	3.5072e-164	1.25126e-162	3.15517	0.731421	643.344	6.262e-142	2.48787e-140	3.23755	-0.528414	24.6439	1.08906e-78	2.25353e-77	168.783
ABLIM3	987.476	2.57453	0.0943145	27.2973	4.57167e-164	1.62868e-162	2.59789	4.65515	649.366	3.0684e-143	1.26986e-141	2.26035	3.82957	23.1279	1.13436e-72	1.71126e-71	154.786
E2F8	58.3566	4.19922	0.153848	27.2946	4.91833e-164	1.74967e-162	4.16411	0.640706	609.899	1.17705e-134	3.8106e-133	4.53116	-1.31099	25.3044	2.7874e-81	6.70677e-80	174.716
TSPAN5	373.346	2.60923	0.0956555	27.2773	7.87871e-164	2.79082e-162	2.62923	3.25763	653.844	3.25924e-144	1.38488e-142	2.40473	2.40767	23.1894	6.43988e-73	9.84659e-72	155.44
GPA33	125.646	5.92628	0.21731	27.2712	9.32745e-164	3.29929e-162	5.86866	1.70037	522.84	1.01993e-115	1.99104e-114	4.94342	-1.52279	19.7904	3.65337e-59	3.03909e-58	123.999
LTBP1	2496.81	3.05685	0.112096	27.2699	9.66579e-164	3.4141e-162	3.08666	6.00262	622.169	2.52377e-137	8.80166e-136	2.89465	4.85716	26.03	4.17687e-84	1.17326e-82	181.076
EXO1	59.0243	3.83374	0.140666	27.2542	1.4799e-163	5.20502e-162	3.79403	0.644613	630.05	4.87372e-139	1.78232e-137	4.13924	-1.05917	26.6464	1.74163e-86	5.73561e-85	186.653
NPC1L1	619.465	3.89128	0.142838	27.2426	2.03201e-163	7.12667e-162	3.8906	3.98276	586.76	1.26944e-129	3.4985e-128	3.35975	2.2548	15.5478	6.97483e-42	3.03952e-41	84.154
HJURP	142.742	4.09317	0.150335	27.2271	3.10735e-163	1.08674e-161	4.06218	1.8815	590.696	1.76816e-130	5.02346e-129	4.47292	-0.0572645	23.5861	1.68372e-74	2.79468e-73	159.17
EDAR	127.085	4.36277	0.160393	27.2005	6.41308e-163	2.23656e-161	4.3317	1.73078	576.543	2.11846e-127	5.51977e-126	3.9405	-0.361439	17.2494	8.82574e-49	4.85817e-48	100.15
FOXM1	458.202	3.19256	0.117383	27.1978	6.9032e-163	2.40412e-161	3.20775	3.54372	636.336	2.09294e-140	7.95864e-139	2.71277	2.32616	19.3825	1.69383e-57	1.31518e-56	120
FGFBP1	181.686	5.15756	0.189676	27.1914	8.20102e-163	2.85209e-161	5.11049	2.2309	531.442	1.37136e-117	2.79118e-116	3.8415	-0.514847	13.1404	2.22823e-32	7.1642e-32	62.5551
GPC6	503.127	3.34021	0.122847	27.19	8.51869e-163	2.95843e-161	3.35325	3.69239	615.193	8.30249e-136	2.76724e-134	3.10688	2.36906	21.9907	4.20395e-68	5.11958e-67	144.388
ARHGAP42	270.988	2.36282	0.086913	27.186	9.49837e-163	3.29405e-161	2.39995	2.81298	640.202	3.0194e-141	1.16965e-139	2.14285	2.08662	20.9919	4.66246e-64	4.77614e-63	135.083
ARPC1B	5534.05	2.19458	0.0808513	27.1434	3.02782e-162	1.04567e-160	2.21012	7.12431	666.826	4.89518e-147	2.22216e-145	2.07703	6.47589	27.9491	1.87578e-91	8.6095e-90	197.958
CYP4F3	320.472	4.19471	0.154612	27.1306	4.29535e-162	1.48136e-160	4.20436	3.05734	571.278	2.96077e-126	7.50958e-125	3.67788	1.03643	16.4583	1.45857e-45	7.16333e-45	92.6933
COL8A1	2314.94	4.38329	0.161678	27.1113	7.24181e-162	2.48372e-160	4.39538	5.89437	550.803	8.42152e-122	1.93267e-120	4.48544	3.7055	24.1824	7.23277e-77	1.33928e-75	164.52
CPZ	551.623	3.76393	0.138871	27.1039	8.86163e-162	3.03508e-160	3.75519	3.81205	590.633	1.82443e-130	5.17741e-129	3.97308	2.17139	25.4026	1.15289e-81	2.82599e-80	175.588
NDNF	137.34	3.96095	0.146479	27.0411	4.86036e-161	1.66008e-159	3.94986	1.8552	582.21	1.24004e-128	3.31805e-127	3.61647	0.0350805	17.3149	4.7701e-49	2.65634e-48	100.744
BANK1	204.34	3.38467	0.125269	27.0191	8.81136e-161	2.99309e-159	2.10774	2.54615	133.442	7.23787e-31	1.98721e-30	2.75838	1.06694	17.5737	4.19365e-50	2.42394e-49	103.103
COL12A1	6927.81	3.73367	0.13819	27.0184	8.99037e-161	3.04973e-159	3.76291	7.46953	583.379	6.90346e-129	1.8714e-127	3.3547	5.84432	23.4637	5.17755e-74	8.37004e-73	157.839
CHST6	87.7945	4.66946	0.172842	27.0157	9.6607e-161	3.27264e-159	4.59584	1.18123	566.906	2.64392e-125	6.55857e-124	4.40257	-1.10461	21.408	9.55662e-66	1.05186e-64	139.091
PHLDA2	657.219	3.92785	0.145427	27.0091	1.15482e-160	3.90674e-159	3.95394	4.04608	606.002	8.28617e-134	2.60778e-132	3.60367	2.23953	16.9373	1.64845e-47	8.67954e-47	97.0841
HTRA3	3448.42	3.73198	0.138201	27.0041	1.32453e-160	4.4722e-159	3.73098	6.44739	576.717	1.94152e-127	5.06939e-126	3.75534	4.8187	26.918	1.57875e-87	5.60028e-86	188.982
CAPG	4374.05	3.07017	0.113722	26.9972	1.59601e-160	5.37728e-159	3.07733	6.78385	621.718	3.16334e-137	1.09552e-135	2.96716	5.61757	26.7454	7.25157e-87	2.43329e-85	187.413
CILP2	219.01	5.09815	0.188886	26.9905	1.90813e-160	6.42017e-159	4.634	2.50313	400.945	3.42884e-89	3.56838e-88	5.4044	-0.250893	22.3733	1.20782e-69	1.58182e-68	148.028
CCL24	41.6229	6.00124	0.222367	26.9881	2.04137e-160	6.85917e-159	6.27042	1.55206	331.213	5.23131e-74	3.78824e-73	4.97214	-2.42412	21.2963	2.71124e-65	2.9182e-64	138.055
TMEM154	273.168	3.44634	0.127746	26.978	2.68004e-160	8.99298e-159	3.44528	2.81347	608.287	2.63898e-134	8.4444e-133	3.53118	1.39025	23.5609	2.12184e-74	3.50083e-73	158.911
TMEM105	32.0297	4.88335	0.181086	26.967	3.60866e-160	1.20764e-158	4.78234	-0.185991	631.688	2.14641e-139	7.943e-138	4.27711	-2.2994	21.0384	3.01676e-64	3.11085e-63	135.657
MYO1A	300.072	5.27346	0.195602	26.9601	4.33888e-160	1.45005e-158	5.24919	2.941	515.591	3.85207e-114	7.24627e-113	4.67127	-0.018544	15.7564	1.00807e-42	4.51343e-42	86.242
EGFL6	65.0327	4.80598	0.178379	26.9425	6.99241e-160	2.33059e-158	4.76007	0.779846	574.674	5.40308e-127	1.39174e-125	4.99035	-1.56111	27.6853	1.87244e-90	7.84058e-89	195.728
NCAPG	170.814	3.3841	0.125656	26.9315	9.4019e-160	3.12528e-158	3.36596	2.13658	615.733	6.33637e-136	2.12046e-134	3.47174	0.742293	23.4446	6.16623e-74	9.91668e-73	157.863
ISG15	1563	3.82128	0.141953	26.9193	1.30729e-159	4.33976e-158	2.90985	5.35096	243.106	8.2694e-55	3.89339e-54	3.13806	3.62432	20.3259	2.38963e-61	2.1783e-60	128.784
TBX15	84.4382	4.46034	0.165705	26.9174	1.37578e-159	4.56102e-158	4.41279	1.15763	564.578	8.48502e-125	2.08193e-123	3.63639	-0.984757	16.8848	2.69695e-47	1.40896e-46	96.767
MDFI	545.417	3.28404	0.122105	26.8952	2.49751e-159	8.24677e-158	3.2737	3.78241	611.632	4.9403e-135	1.6248e-133	3.32165	2.49833	23.3021	2.28272e-73	3.57842e-72	156.492
CMTM3	1378.14	2.93796	0.109278	26.8852	3.27252e-159	1.07772e-157	2.94663	5.1293	617.098	3.19909e-136	1.0793e-134	2.79228	4.08213	26.2333	6.82406e-85	1.99586e-83	182.914
ADGRF4	100.271	4.89174	0.18201	26.8762	4.16808e-159	1.37083e-157	4.85736	1.39719	546.773	6.33756e-121	1.41645e-119	5.36087	-1.11113	24.8403	1.83842e-79	3.9661e-78	170.548
C11orf86	51.5617	7.66371	0.285223	26.8692	5.0319e-159	1.65056e-157	6.16982	0.477756	314.369	2.44017e-70	1.63541e-69	4.88831	-2.9908	18.9629	8.79972e-56	6.34454e-55	116.258
AMIGO2	998.857	2.84705	0.105982	26.8635	5.87435e-159	1.91929e-157	2.8802	4.67415	629.965	5.08747e-139	1.85775e-137	2.36992	3.66824	19.7881	3.73356e-59	3.10268e-58	123.703
CYP2C18	337.317	5.42914	0.20211	26.8623	6.05933e-159	1.97713e-157	5.41823	3.12742	508.681	1.2278e-112	2.21084e-111	5.61655	0.0520362	17.2441	9.27463e-49	5.10074e-48	100.093
CTB-193M12.5	78.1506	2.61849	0.097599	26.8291	1.47882e-158	4.80009e-157	2.57427	1.02264	656.607	8.17127e-145	3.54103e-143	2.40099	0.14781	21.9968	3.97373e-68	4.84873e-67	144.534
RND3	895.304	2.30193	0.0858064	26.8271	1.56246e-158	5.06493e-157	2.3274	4.50993	646.549	1.25772e-142	5.09468e-141	2.12383	3.83095	25.4207	9.79181e-82	2.41931e-80	175.638
KCP	199.995	3.99215	0.148811	26.827	1.56562e-158	5.06857e-157	3.99135	2.36083	574.905	4.81239e-127	1.24217e-125	3.23779	0.534389	14.7607	9.85831e-39	3.86459e-38	77.0496
MSX2	112.483	3.52676	0.131483	26.8229	1.74817e-158	5.64485e-157	3.47808	1.52918	610.446	8.94857e-135	2.91221e-133	2.93003	0.0827239	16.7022	1.49153e-46	7.55996e-46	95.0139
RAB31	2579.14	2.94756	0.109896	26.8212	1.8278e-158	5.89429e-157	2.9693	6.04422	606.698	5.84658e-134	1.84938e-132	2.76364	4.95649	25.8115	2.94241e-83	7.89871e-82	179.117
AURKA	204.32	2.66353	0.099357	26.8077	2.62681e-158	8.44902e-157	2.67612	2.38969	648.26	5.34014e-143	2.18453e-141	2.33348	1.4877	19.9104	1.18327e-59	1.00382e-58	125.004
STMN1	1854.42	2.25819	0.0842554	26.8017	3.085e-158	9.90992e-157	2.26907	5.54564	657.053	6.53531e-145	2.842e-143	2.06951	4.88595	28.4281	2.94012e-93	1.54022e-91	202.114
COL1A2	82570.1	4.20154	0.156811	26.7937	3.82303e-158	1.22648e-156	4.20951	11.0396	527.246	1.12218e-116	2.24174e-115	5.4907	9.50455	29.9261	7.96968e-99	6.12678e-97	215.017
F2R	1824.71	3.02253	0.11284	26.786	4.70654e-158	1.50798e-156	3.05331	5.55393	599.716	1.9304e-132	5.80311e-131	2.97595	4.42456	27.2767	6.70776e-89	2.57038e-87	192.129
ACE	1115.42	2.17227	0.0810984	26.7856	4.74957e-158	1.5198e-156	2.19616	4.82396	650.472	1.76429e-143	7.37525e-142	2.06748	4.21684	28.6185	5.67811e-94	3.09195e-92	203.78
NEK2	133.671	4.65952	0.174054	26.7706	7.11615e-158	2.27122e-156	4.64824	1.79047	551.868	4.93927e-122	1.14197e-120	5.41978	-0.601118	26.6389	1.86137e-86	6.06556e-85	186.596
CENPK	77.6749	2.99579	0.111935	26.7637	8.54666e-158	2.72429e-156	2.9811	1.02969	632.178	1.67937e-139	6.25193e-138	2.93956	-0.117513	23.0232	2.97488e-72	4.38393e-71	154.011
LINC00920	53.4087	3.60254	0.134706	26.7437	1.46116e-157	4.63966e-156	3.56185	0.511319	611.531	5.19587e-135	1.70434e-133	3.55655	-1.02376	24.4989	4.06068e-78	8.12495e-77	167.468
CST4	42.0204	7.59746	0.284499	26.7047	4.14639e-157	1.30659e-155	6.87076	0.152679	436.984	4.90768e-97	6.14847e-96	5.05739	-3.06531	24.2548	3.73743e-77	7.04663e-76	165.226
EFNA2	36.5724	6.18379	0.231603	26.7	4.71156e-157	1.4828e-155	5.47369	-0.00722671	467.084	1.38116e-103	1.99393e-102	4.74301	-2.67952	22.8295	1.77579e-71	2.52547e-70	152.224
FAM64A	53.2585	4.07234	0.152554	26.6944	5.46731e-157	1.71847e-155	4.00799	0.494325	593.465	4.41812e-131	1.27714e-129	4.49387	-1.37573	28.0904	5.48914e-92	2.62622e-90	199.249
RUNX2	376.094	2.95198	0.110624	26.6848	7.06712e-157	2.2157e-155	2.96472	3.27064	604.79	1.52016e-133	4.72428e-132	2.75832	2.19396	21.0334	3.16289e-64	3.25748e-63	135.478
CD55	4841.12	3.20645	0.12018	26.6804	7.95282e-157	2.48711e-155	3.23655	6.93406	614.147	1.40207e-135	4.64817e-134	2.85173	5.67011	27.2504	8.45508e-89	3.22006e-87	191.859
KIF23	188.332	2.69349	0.100968	26.6766	8.79619e-157	2.74395e-155	2.70422	2.28015	629.15	7.64946e-139	2.78102e-137	2.40332	1.35136	19.0523	3.78942e-56	2.77731e-55	116.96
CDH11	2393.54	3.64427	0.136695	26.6598	1.37632e-156	4.28262e-155	3.66323	5.94106	563.562	1.41206e-124	3.4409e-123	3.55068	4.3483	24.7341	4.80646e-79	1.0166e-77	169.474
LYZ	23362.6	4.46006	0.167307	26.6579	1.44859e-156	4.49625e-155	4.47013	9.21398	521.269	2.24061e-115	4.35001e-114	4.59595	7.10266	22.3392	1.65634e-69	2.15108e-68	147.515
PARPBP	68.6233	2.3034	0.0864497	26.6445	2.07475e-156	6.4237e-155	2.28926	0.856344	641.034	1.99115e-141	7.77395e-140	2.12906	0.130814	21.8059	2.34421e-67	2.76003e-66	142.764
ABCB4	51.0166	3.43032	0.128745	26.6444	2.07783e-156	6.42524e-155	2.76169	0.496104	291.659	2.16276e-65	1.29343e-64	3.22431	-0.927343	24.7272	5.11956e-79	1.08007e-77	169.532
CR2	476.568	7.22203	0.271117	26.638	2.46201e-156	7.60375e-155	2.19482	3.83416	35.7291	2.26746e-09	3.55743e-09	3.67194	-1.28488	8.94153	2.19518e-17	4.50298e-17	28.3508
BUB1B	147.585	3.35973	0.126158	26.6312	2.95643e-156	9.10808e-155	3.34774	1.93695	605.59	1.01827e-133	3.18045e-132	3.58754	0.536867	24.9019	1.05259e-79	2.30687e-78	171.112
ITGB6	3802.75	3.79216	0.142413	26.628	3.22088e-156	9.91048e-155	3.82523	6.61109	560.244	7.43957e-124	1.79004e-122	3.1535	4.89059	15.3925	2.93664e-41	1.25162e-40	82.5302
FAR2	240.269	2.75938	0.103663	26.6188	4.11859e-156	1.26258e-154	2.76421	2.61687	625.179	5.58966e-138	1.98281e-136	2.17578	1.66851	20.1705	1.0279e-60	9.15157e-60	127.428
TRABD2A	130.472	3.85843	0.14499	26.6118	4.96025e-156	1.51872e-154	3.81145	1.74238	581.359	1.8988e-128	5.0535e-127	3.5599	0.0177825	19.8407	2.27622e-59	1.91143e-58	124.434
LIPH	1404.2	2.84	0.106724	26.6107	5.10231e-156	1.56029e-154	2.87036	5.16072	621.901	2.88596e-137	1.00086e-135	2.30582	4.14682	15.1475	2.8185e-40	1.16063e-39	80.2725
CDC45	94.2299	3.77396	0.14189	26.5978	7.204e-156	2.20028e-154	3.72906	1.28275	586.377	1.53788e-129	4.2336e-128	3.91039	-0.408894	24.4276	7.76192e-78	1.52e-76	166.827
LGR5	134.997	4.9719	0.187009	26.5865	9.72327e-156	2.9588e-154	4.92931	1.81704	522.895	9.92555e-116	1.93911e-114	4.40644	-0.824574	18.9497	9.95794e-56	7.16919e-55	116.105
CENPI	36.5012	2.96431	0.111512	26.583	1.06825e-155	3.24275e-154	2.93666	-0.00153032	633.99	6.77609e-140	2.54549e-138	2.97458	-1.14037	22.7015	5.79008e-71	8.05002e-70	151.059
PBK	83.6166	3.46497	0.130466	26.5585	2.05116e-155	6.2037e-154	3.43057	1.129	596.776	8.41522e-132	2.46996e-130	3.48052	-0.34268	22.6372	1.04981e-70	1.44261e-69	150.462
LGALS4	8827.89	3.87349	0.145927	26.5439	3.01653e-155	9.09022e-154	3.88437	7.79264	563.979	1.14557e-124	2.79977e-123	2.97841	6.07668	15.2846	7.95392e-41	3.33903e-40	81.4973
SLC22A3	337.206	3.36769	0.126962	26.5251	4.97973e-155	1.49699e-153	3.38232	3.11831	588.521	5.2553e-130	1.46788e-128	3.08314	1.74212	17.3321	4.06135e-49	2.26674e-48	100.797
IFI6	4529.79	3.62312	0.136614	26.5208	5.57739e-155	1.67059e-153	3.18109	6.85872	358.122	7.22111e-80	6.00092e-79	3.26311	5.28933	23.8679	1.27547e-75	2.23036e-74	161.548
PHACTR3	251.082	4.45799	0.168193	26.5052	8.44763e-155	2.52423e-153	4.4485	2.69772	536.405	1.1417e-118	2.39438e-117	3.42772	0.432525	13.7612	8.68057e-35	2.99829e-34	68.0138
FAM81A	88.7655	2.45654	0.0927598	26.4828	1.53132e-154	4.55379e-153	2.43416	1.20764	630.549	3.79723e-139	1.39481e-137	2.17784	0.41174	21.7258	4.94457e-67	5.73197e-66	142.011
NINJ2	117.558	3.0136	0.113796	26.4824	1.54469e-154	4.58806e-153	2.99559	1.61364	604.784	1.52517e-133	4.73394e-132	2.97943	0.472409	23.5299	2.81995e-74	4.62804e-73	158.647
ADAM8	1365.88	2.76331	0.104384	26.4726	2.00514e-154	5.9344e-153	2.77789	5.10749	624.277	8.78095e-138	3.08838e-136	2.21837	4.15468	19.1547	1.44591e-56	1.07721e-55	117.713
CCL22	140.902	5.03853	0.190424	26.4596	2.83225e-154	8.36238e-153	3.89844	1.91136	243.296	7.51883e-55	3.54404e-54	5.37916	-0.760822	22.754	3.56408e-71	4.9887e-70	151.542
MMP1	5065.97	6.6573	0.25163	26.4567	3.05568e-154	9.01137e-153	6.68345	7.03943	425.901	1.26753e-94	1.496e-93	6.89859	2.31996	18.3539	2.72079e-53	1.76766e-52	110.45
BPIFB1	321.417	7.30814	0.276574	26.4238	7.29168e-154	2.13514e-152	7.10094	3.52102	340.518	4.92049e-76	3.72389e-75	5.62506	-1.48259	14.13	3.09954e-36	1.12001e-35	71.439
MST1R	1413.07	2.97924	0.112754	26.4225	7.56316e-154	2.21202e-152	3.01083	5.16405	616.773	3.76402e-136	1.26817e-134	2.32335	4.06145	15.1062	4.12313e-40	1.6917e-39	79.8989
COL5A1	12973.8	3.73414	0.14152	26.386	1.98367e-153	5.75427e-152	3.74506	8.36963	542.919	4.36914e-120	9.4834e-119	4.01345	6.77379	27.8332	5.14717e-91	2.28231e-89	196.988
PPAPDC1A	184.211	5.60141	0.212289	26.3858	1.99526e-153	5.77439e-152	4.70049	2.26323	297.026	1.46481e-66	9.00761e-66	6.18528	-0.889197	23.3522	1.44057e-73	2.27694e-72	157.032
SCEL	370.196	5.01716	0.190192	26.3795	2.35742e-153	6.80665e-152	5.00257	3.25439	504.671	9.15703e-112	1.60578e-110	4.68581	0.446679	15.0182	9.2682e-40	3.75614e-39	79.4232
PLEK2	945.614	3.03901	0.115217	26.3764	2.55689e-153	7.36544e-152	3.06036	4.58266	608.705	2.13989e-134	6.88286e-133	2.43126	3.43702	14.3155	5.75001e-37	2.12658e-36	72.7334
ADAM9	4241.26	2.45106	0.0929986	26.3559	4.39061e-153	1.26038e-151	2.49495	6.76522	603.129	3.49272e-133	1.07603e-131	2.19805	5.94749	24.4887	4.45308e-78	8.88862e-77	167.162
RMI2	159.509	2.78002	0.105514	26.3474	5.49464e-153	1.57549e-151	2.76555	2.03253	612.284	3.56467e-135	1.17393e-133	2.64514	1.03916	20.8114	2.5231e-63	2.50805e-62	133.47
FNDC1	1549.31	3.95321	0.150066	26.343	6.16558e-153	1.7638e-151	3.97877	5.30891	548.461	2.72185e-121	6.14979e-120	3.63785	3.45874	19.4575	8.36337e-58	6.56978e-57	120.664
GJB5	125.254	4.99875	0.189803	26.3365	7.33169e-153	2.09257e-151	4.92947	1.69275	512.254	2.05022e-113	3.76824e-112	3.96539	-0.932407	14.1055	3.87021e-36	1.3956e-35	71.1909
SGOL1	44.5989	3.53517	0.134268	26.3292	8.89299e-153	2.53236e-151	3.47016	0.263454	603.651	2.68904e-133	8.30493e-132	3.68067	-1.24499	23.8832	1.10917e-75	1.94504e-74	161.878
IDO1	207.982	4.8599	0.184594	26.3275	9.27979e-153	2.63646e-151	4.55475	2.45816	418.454	5.29571e-93	6.02648e-92	4.31617	-0.183578	19.7071	7.99601e-59	6.5571e-58	123.19
PLA2R1	291.359	2.42437	0.0920961	26.3244	1.00887e-152	2.86299e-151	2.44853	2.90939	609.151	1.71135e-134	5.51877e-133	2.12525	2.14207	18.5191	5.74169e-54	3.83052e-53	111.884
GTSE1	109.057	3.38441	0.128645	26.3082	1.54577e-152	4.38163e-151	3.35755	1.5001	591.633	1.10612e-130	3.16794e-129	3.49469	0.0715226	23.658	8.71495e-75	1.47212e-73	159.825
EMP3	870.998	2.68827	0.102191	26.3064	1.61946e-152	4.58528e-151	2.6975	4.4618	611.192	6.15932e-135	2.01505e-133	2.44609	3.56727	23.9933	4.05693e-76	7.27347e-75	162.738
GPR87	134.781	6.6091	0.251362	26.2931	2.29789e-152	6.46192e-151	6.5598	1.80244	467.364	1.20048e-103	1.73611e-102	5.29803	-1.90432	16.2694	8.5076e-45	4.06333e-44	91.0673
EDNRA	655.728	3.24172	0.123321	26.2868	2.714e-152	7.61483e-151	3.25967	4.07586	574.847	4.95518e-127	1.2777e-125	3.24672	2.79885	23.5604	2.13104e-74	3.50901e-73	158.844
CENPF	505.798	3.96402	0.150819	26.2833	2.97829e-152	8.33754e-151	4.04934	3.69267	601.586	7.56446e-133	2.30753e-131	4.52227	1.7912	24.4959	4.17382e-78	8.34461e-77	167.426
GPX8	791.135	2.2868	0.0870651	26.2654	4.76931e-152	1.33064e-150	2.31565	4.33622	614.996	9.16246e-136	3.04569e-134	2.05073	3.66136	21.0827	1.99503e-64	2.07101e-63	135.818
RTP4	263.181	2.51544	0.0957966	26.2581	5.77876e-152	1.61046e-150	2.51833	2.74439	619.91	7.82224e-137	2.67909e-135	2.22199	1.93748	19.6406	1.49468e-58	1.20933e-57	122.44
TOR4A	1082.07	2.36363	0.0900319	26.2532	6.569e-152	1.82864e-150	2.38308	4.77525	626.313	3.16712e-138	1.13318e-136	2.02037	4.05401	21.2114	5.99077e-65	6.33547e-64	136.993
LINC01232	70.7086	2.90933	0.110885	26.2373	9.9748e-152	2.77052e-150	2.88133	0.893716	609.331	1.56407e-134	5.0504e-133	2.62505	-0.174427	19.6169	1.86664e-58	1.50148e-57	122.341
ANOS1	182.914	3.54258	0.135118	26.2184	1.6385e-151	4.5307e-150	3.53424	2.25576	563.305	1.60539e-124	3.90054e-123	3.50665	0.713506	21.8795	1.182e-67	1.40634e-66	143.435
SCUBE3	187.538	4.22102	0.161006	26.2166	1.71887e-151	4.74764e-150	4.2058	2.29191	538.961	3.17373e-119	6.74717e-118	3.48039	0.21435	17.0729	4.62313e-48	2.47781e-47	98.4717
TMC5	2434.93	4.09476	0.156276	26.2021	2.51291e-151	6.93312e-150	4.11599	5.95332	538.904	3.26425e-119	6.92774e-118	4.16894	3.95623	20.3617	1.7073e-61	1.56782e-60	129.145
HCAR1	71.7205	4.82004	0.18407	26.1859	3.84457e-151	1.05486e-149	4.77335	0.928629	532.344	8.73037e-118	1.7813e-116	4.15689	-1.49385	19.2229	7.61168e-57	5.72744e-56	118.681
PKIA	166.071	3.12309	0.119314	26.1755	5.05193e-151	1.38155e-149	3.10855	2.10389	584.055	4.92119e-129	1.3355e-127	3.06773	0.887991	23.4668	5.02896e-74	8.14574e-73	158.061
ADAMTS12	879.629	3.76126	0.143756	26.1642	6.78669e-151	1.84781e-149	3.77485	4.50146	541.838	7.50853e-120	1.62267e-118	3.6683	2.7975	20.9171	9.38841e-64	9.50362e-63	134.383
ACTB	98402.3	2.11277	0.0807609	26.1608	7.42638e-151	2.01976e-149	2.13116	11.277	559.15	1.28689e-123	3.07554e-122	3.48704	11.314	30.1228	1.51174e-99	1.23888e-97	216.682
VSIG1	910.898	6.38875	0.24438	26.1427	1.19174e-150	3.22354e-149	6.39056	4.54224	434.053	2.1316e-96	2.63202e-95	6.26903	0.289391	14.5878	4.7997e-38	1.84663e-37	75.5189
GRN	10636.7	2.04792	0.0785533	26.0705	7.88023e-150	2.11768e-148	2.06219	8.06244	619.283	1.07085e-136	3.65753e-135	2.00447	7.54016	26.299	3.80052e-85	1.13563e-83	183.475
TRIM10	30.5394	4.75866	0.18254	26.0692	8.15347e-150	2.18874e-148	4.68712	-0.248014	591.169	1.395e-130	3.9724e-129	4.40237	-2.36014	22.8689	1.2347e-71	1.76708e-70	152.588
COL3A1	91549.7	4.20244	0.161407	26.0363	1.92181e-149	5.13123e-148	4.21067	11.1915	497.537	3.26455e-110	5.51819e-109	5.61738	9.62648	29.1311	6.93364e-96	4.28282e-94	208.261
ADTRP	133.849	4.60478	0.176868	26.0352	1.98013e-149	5.28126e-148	4.57213	1.79475	519.541	5.32691e-115	1.02299e-113	4.46811	-0.574095	19.6197	1.81957e-58	1.46504e-57	122.381
GPR153	583.215	2.78218	0.10687	26.0333	2.07713e-149	5.53402e-148	2.78419	3.8839	592.117	8.67749e-131	2.49676e-129	2.39177	2.92234	22.5171	3.18745e-70	4.28984e-69	149.212
DNAH3	28.1814	4.51248	0.173411	26.0219	2.79707e-149	7.44417e-148	4.46692	-0.342946	602.433	4.94913e-133	1.51531e-131	4.05933	-2.31349	22.2594	3.47186e-69	4.44609e-68	146.976
CENPA	50.5677	3.73156	0.14352	26.0003	4.91128e-149	1.29736e-147	3.68541	0.421577	580.381	3.09831e-128	8.21946e-127	3.85074	-1.22148	23.9281	7.35859e-76	1.30422e-74	162.287
CTSK	2868.53	3.35993	0.129371	25.9713	1.04457e-148	2.73028e-147	3.36488	6.18731	550.525	9.67985e-122	2.2153e-120	3.16733	4.79282	25.0264	3.41944e-80	7.72595e-79	172.083
AKR1B10	793.986	5.38256	0.207332	25.9611	1.36385e-148	3.56106e-147	5.39839	4.35598	469.194	4.798e-104	7.01231e-103	5.02371	1.08877	13.6051	3.52692e-34	1.19396e-33	66.6023
IGFL2	189.143	6.54359	0.252086	25.9578	1.48585e-148	3.87553e-147	4.75117	2.3087	191.569	1.44506e-43	5.2776e-43	6.5365	-1.45866	20.482	5.52418e-62	5.19981e-61	130.465
MND1	34.9292	3.49512	0.134667	25.9538	1.64745e-148	4.29252e-147	3.44028	-0.0809019	597.092	7.18398e-132	2.11357e-130	3.72382	-1.56345	27.2103	1.20261e-88	4.52456e-87	191.588
ZNF365	146.639	3.72308	0.143489	25.9469	1.97285e-148	5.12962e-147	3.69609	1.93216	541.974	7.0152e-120	1.51737e-118	3.78275	0.23073	21.7666	3.38027e-67	3.94064e-66	142.401
MYB	66.0726	3.73663	0.144041	25.9415	2.26756e-148	5.87744e-147	3.6768	0.795545	563.58	1.39904e-124	3.41252e-123	3.67872	-0.866369	23.3146	2.03585e-73	3.19546e-72	156.688
ZBED2	83.2531	6.16293	0.237636	25.9343	2.7333e-148	7.0625e-147	6.08568	1.1261	482.605	5.79198e-107	9.03395e-106	5.07406	-2.10979	19.4651	7.78833e-58	6.12775e-57	120.958
CXCL13	271.456	6.2501	0.241025	25.9313	2.95231e-148	7.62045e-147	3.26199	2.88016	101.787	6.18276e-24	1.43965e-23	4.37573	-1.10248	13.2114	1.18703e-32	3.83942e-32	63.215
MCM10	56.1281	3.64934	0.140823	25.9144	4.58915e-148	1.18331e-146	3.61647	0.581141	567.92	1.59141e-125	3.97949e-124	3.95699	-1.05944	25.0793	2.12013e-80	4.84761e-79	172.701
CSTB	4505.31	2.30284	0.0889	25.9037	6.04436e-148	1.55692e-146	2.32179	6.82616	615.18	8.35888e-136	2.7823e-134	2.00771	6.1018	26.2746	4.72485e-85	1.40171e-83	183.214
BX470102.3	45.5603	5.03434	0.194644	25.8643	1.67805e-147	4.29563e-146	4.9501	0.263983	546.873	6.02968e-121	1.35007e-119	4.27991	-2.10222	21.2257	5.23976e-65	5.55781e-64	137.4
EPSTI1	664.088	3.08369	0.119236	25.862	1.78525e-147	4.56066e-146	3.09201	4.08287	567.581	1.88619e-125	4.69769e-124	3.10638	2.90515	25.6514	1.23436e-82	3.17951e-81	177.78
C11orf70	55.7088	2.56132	0.0990715	25.8532	2.23681e-147	5.70249e-146	2.53164	0.573424	589.193	3.75316e-130	1.05305e-128	2.40635	-0.320716	22.5538	2.26972e-70	3.07471e-69	149.693
PRR5L	353.797	2.82035	0.10915	25.8391	3.22258e-147	8.19877e-146	2.82269	3.17061	582.545	1.04846e-128	2.81149e-127	2.78408	2.16179	22.6758	7.34589e-71	1.01732e-69	150.732
BST2	2689.02	2.9516	0.114257	25.833	3.77331e-147	9.58028e-146	2.95185	6.07822	579.711	4.33554e-128	1.14527e-126	2.67244	4.9808	25.0422	2.96493e-80	6.71123e-79	172.2
SYT13	1763.18	3.12026	0.120842	25.8211	5.13665e-147	1.30151e-145	3.13318	5.48056	567.617	1.85247e-125	4.62298e-124	2.74907	4.26613	19.616	1.88347e-58	1.51452e-57	122.065
COL8A2	769.144	3.65867	0.141701	25.8196	5.3364e-147	1.35075e-145	3.66593	4.30125	534.448	3.04222e-118	6.3109e-117	3.5648	2.67336	20.8082	2.60055e-63	2.584e-62	133.37
PSMB9	851.693	2.83031	0.109756	25.7872	1.23476e-146	3.11906e-145	2.8402	4.43253	582.245	1.21804e-128	3.2627e-127	2.71943	3.42975	25.3936	1.24919e-81	3.05301e-80	175.434
MMP11	12193.4	5.77806	0.224081	25.7856	1.28747e-146	3.24891e-145	5.10194	8.27567	320.963	8.93417e-72	6.16405e-71	7.31291	4.53253	30.1574	1.12923e-99	9.44108e-98	216.973
SELPLG	803.456	3.34095	0.129683	25.7625	2.33509e-146	5.86869e-145	3.34138	4.34966	552.283	4.01207e-122	9.31063e-121	3.43278	2.98086	24.3034	2.40179e-77	4.56652e-76	165.621
PDLIM7	2553.62	2.607	0.101283	25.7399	4.1855e-146	1.04768e-144	2.61591	6.01098	584.702	3.55853e-129	9.74221e-128	2.37404	5.11586	24.9143	9.41013e-80	2.07148e-78	171.03
SLC5A1	978.675	3.55525	0.138317	25.7037	1.06308e-145	2.65299e-144	3.58177	4.65411	535.646	1.66988e-118	3.49325e-117	2.93673	3.10108	14.8133	6.08962e-39	2.40247e-38	77.3209
SULF1	7355.04	4.44013	0.172836	25.6898	1.5199e-145	3.78162e-144	4.45094	7.55814	485.87	1.12857e-107	1.78836e-106	5.06311	5.22251	30.2889	3.72605e-100	3.2578e-98	218.056
FTH1P20	88.466	2.53481	0.0986911	25.6842	1.75354e-145	4.35857e-144	2.51148	1.20141	603.741	2.57062e-133	7.94908e-132	2.42033	0.349618	22.4989	3.77357e-70	5.05948e-69	149.173
PKMYT1	204.395	2.9444	0.114648	25.682	1.85511e-145	4.60642e-144	2.91198	2.35953	588.018	6.75987e-130	1.88178e-128	2.44194	1.28406	16.8759	2.93116e-47	1.52875e-46	96.5513
EEF1A1P12	34.5332	2.3734	0.0925202	25.6527	3.94332e-145	9.7236e-144	2.3516	-0.0870385	619.156	1.14123e-136	3.89256e-135	2.43779	-0.87219	25.2368	5.12584e-81	1.22032e-79	174.119
PLK4	86.6231	2.25989	0.0881121	25.6478	4.46815e-145	1.09959e-143	2.26361	1.18407	591.341	1.28031e-130	3.66259e-129	2.08085	0.456956	20.6517	1.1259e-62	1.09037e-61	132.002
HAPLN1	39.3838	6.82979	0.266349	25.6422	5.16331e-145	1.26941e-143	6.72725	0.102631	534.359	3.18142e-118	6.59415e-117	4.69925	-2.97046	21.0716	2.21159e-64	2.29295e-63	135.965
S100A4	3883.58	3.68569	0.143791	25.6323	6.66477e-145	1.6353e-143	3.69311	6.61486	528.8	5.15278e-117	1.03602e-115	2.91022	4.95681	19.9001	1.30289e-59	1.10153e-58	124.708
TIMP1	14728.2	3.03975	0.118647	25.6201	9.10125e-145	2.23093e-143	3.03343	8.52899	549.04	2.03671e-121	4.61017e-120	3.45719	7.43732	27.1595	1.88e-88	6.97791e-87	191.095
RP11-304L19.1	47.4006	3.72649	0.145465	25.6178	9.67245e-145	2.36627e-143	3.61627	0.330227	557.701	2.65944e-123	6.31928e-122	3.02601	-1.21369	16.9496	1.46857e-47	7.74882e-47	97.3801
COL7A1	1445.79	3.58623	0.140187	25.5817	2.4356e-144	5.92344e-143	3.60188	5.19913	533.357	5.25664e-118	1.08142e-116	2.72425	3.61672	16.0015	1.0329e-43	4.7611e-43	88.2263
MYH14	6852.45	2.35462	0.0920726	25.5735	3.00948e-144	7.30482e-143	2.38431	7.43744	593.841	3.65881e-131	1.05888e-129	2.01707	6.69513	20.5303	3.51371e-62	3.33647e-61	130.589
HPSE	162.483	2.53388	0.0991957	25.5443	6.35558e-144	1.53666e-142	2.53751	2.07305	571.432	2.73987e-126	6.95642e-125	2.48482	1.18284	22.7727	2.99925e-71	4.20997e-70	151.67
SHCBP1	117.021	3.26796	0.128019	25.5271	9.85573e-144	2.38062e-142	3.25562	1.60659	559.052	1.35185e-123	3.22768e-122	3.51815	0.212923	24.2891	2.73462e-77	5.19138e-76	165.57
CD52	481.939	3.9035	0.152945	25.5223	1.11397e-143	2.68815e-142	2.51713	3.73038	148.786	3.19421e-34	9.45471e-34	3.71962	1.81438	19.634	1.59018e-58	1.28409e-57	122.42
ZNF860	45.494	2.97845	0.116737	25.5142	1.37121e-143	3.29928e-142	2.94788	0.307125	573.907	7.93197e-127	2.0368e-125	3.15665	-0.888275	25.406	1.11736e-81	2.74161e-80	175.635
THBS2	9161.18	3.97661	0.155954	25.4986	2.04301e-143	4.89672e-142	3.99972	7.877	504.81	8.53998e-112	1.49863e-110	4.23473	5.9705	26.4382	1.10351e-85	3.40813e-84	184.726
B2M	56196.2	2.11551	0.0829907	25.4909	2.48612e-143	5.94729e-142	2.1415	10.476	543.128	3.93591e-120	8.57304e-119	3.00741	10.3562	26.385	1.77038e-85	5.41382e-84	184.34
CGB8	114.45	9.2949	0.364798	25.4796	3.32095e-143	7.92908e-142	7.80701	1.57176	262.582	4.69579e-59	2.4414e-58	5.11665	-3.06864	16.1006	4.10283e-44	1.91463e-43	89.5219
RUNX1	2408.71	2.69794	0.105903	25.4755	3.68753e-143	8.79588e-142	2.71753	5.93979	562.641	2.23894e-124	5.43451e-123	2.76435	4.97556	26.4991	6.42705e-86	2.01503e-84	185.24
EIF5AP4	19.9502	4.35002	0.170987	25.4407	8.93854e-143	2.11989e-141	4.06692	-0.791424	708.184	4.96534e-156	2.94259e-154	4.6524	-2.52814	39.7522	2.41958e-132	5.46188e-129	291.376
SCIN	425.058	3.2956	0.129558	25.4373	9.74775e-143	2.3074e-141	3.30142	3.44553	542.219	6.20419e-120	1.34312e-118	2.75511	2.073	16.7393	1.05301e-46	5.37348e-46	95.2196
FBN1	5165.96	3.14057	0.123475	25.4349	1.0384e-142	2.45333e-141	3.17342	7.05362	538.838	3.37531e-119	7.15734e-118	2.88076	5.78006	23.0598	2.12327e-72	3.16084e-71	154.112
LINC00460	24.8148	6.77802	0.266551	25.4286	1.21643e-142	2.86849e-141	6.97575	-0.535808	574.642	5.49052e-127	1.4128e-125	4.40577	-3.3176	22.6121	1.32369e-70	1.81094e-69	150.218
NOX4	195.926	3.76994	0.14835	25.4125	1.83597e-142	4.30898e-141	3.74021	2.3377	526.688	1.48416e-116	2.95062e-115	3.99099	0.587138	22.0273	2.99192e-68	3.66876e-67	144.811
MMP14	12973.2	2.7208	0.107106	25.4028	2.34799e-142	5.48475e-141	2.74164	8.36332	551.764	5.20308e-122	1.20184e-120	2.64545	7.46147	24.1378	1.08542e-76	1.99496e-75	164.018
ADAM12	734.103	4.69665	0.185001	25.3872	3.49423e-142	8.13171e-141	4.15361	4.25624	333.928	1.34053e-74	9.83068e-74	5.04139	1.60905	19.5024	5.4845e-58	4.33989e-57	121.22
MATN3	630.911	4.52901	0.178419	25.3842	3.76986e-142	8.75672e-141	4.5221	4.0281	480.761	1.45938e-106	2.26063e-105	4.85586	1.55465	20.178	9.57633e-61	8.53517e-60	127.553
TNFSF15	116.985	3.22499	0.127049	25.3838	3.80777e-142	8.83651e-141	3.19949	1.61042	544.359	2.12351e-120	4.65803e-119	3.22504	0.264812	21.2517	4.11009e-65	4.38957e-64	137.611
PTHLH	119.968	3.80627	0.15002	25.3717	5.18212e-142	1.19923e-140	3.76976	1.63547	526.555	1.58658e-116	3.14919e-115	3.48732	-0.123139	20.5455	3.04742e-62	2.90147e-61	131.034
PYCARD	655.797	2.43397	0.0960294	25.3461	9.92301e-142	2.28146e-140	2.42913	4.04146	585.486	2.40328e-129	6.60862e-128	2.09803	3.28274	21.3833	1.2038e-65	1.31681e-64	138.651
RAD51AP1	89.9833	2.61811	0.103364	25.3291	1.52566e-141	3.49481e-140	2.60901	1.23669	569.51	7.17481e-126	1.80504e-124	2.41407	0.293914	20.2278	6.00213e-61	5.3863e-60	128.045
LY6D	614.835	6.28981	0.248413	25.32	1.92278e-141	4.40042e-140	6.22837	3.93484	409.683	4.29628e-91	4.67284e-90	3.40774	-0.372354	8.92801	2.42517e-17	4.9682e-17	28.1869
RP11-58O9.2	46.3851	6.22924	0.246312	25.29	4.11571e-141	9.3416e-140	6.1262	0.316527	515.731	3.59264e-114	6.76336e-113	5.12944	-2.59101	21.8824	1.15078e-67	1.3705e-66	143.492
MMP9	1038.01	5.0689	0.200502	25.2811	5.15733e-141	1.16845e-139	4.01418	4.76116	245.51	2.47384e-55	1.18131e-54	6.00758	1.70341	24.3023	2.42514e-77	4.60739e-76	165.683
TM4SF20	218.615	7.43661	0.294371	25.2627	8.20685e-141	1.85427e-139	7.34586	2.48952	392.35	2.54796e-87	2.53074e-86	3.56355	-2.41745	10.2089	1.30881e-21	3.04783e-21	38.0442
GINS1	100.867	2.49855	0.0989183	25.2587	9.07735e-141	2.04909e-139	2.48642	1.3929	569.012	9.21019e-126	2.31242e-124	2.25307	0.536725	19.826	2.61367e-59	2.18887e-58	124.27
MAP1A	700.48	2.36231	0.0935573	25.2498	1.13689e-140	2.55476e-139	2.38564	4.16396	559.614	1.0198e-123	2.4419e-122	2.14977	3.43443	22.4902	4.08769e-70	5.47473e-69	148.924
DIAPH3	95.2669	3.06729	0.121521	25.2408	1.42979e-140	3.20136e-139	3.0525	1.32029	554.321	1.4458e-122	3.38048e-121	3.08875	0.0758618	21.2696	3.47947e-65	3.7273e-64	137.782
SPTSSB	205.673	3.64567	0.144452	25.238	1.53441e-140	3.43251e-139	3.62366	2.40469	523.347	7.91355e-116	1.55092e-114	3.22394	0.757354	17.2119	1.25509e-48	6.86761e-48	99.7402
GBP4	694.769	2.60263	0.103156	25.2301	1.87341e-140	4.18332e-139	2.64076	4.15939	560.222	7.52132e-124	1.80796e-122	2.34541	3.27564	21.9268	7.61357e-68	9.15066e-67	143.718
EPYC	111.369	8.6057	0.341132	25.2269	2.0333e-140	4.53629e-139	7.35162	1.5422	294.206	6.02692e-66	3.65457e-65	5.13551	-2.86805	15.4912	1.17842e-41	5.09071e-41	83.888
CKMT1B	562.577	2.68843	0.106571	25.2266	2.045e-140	4.5583e-139	2.69625	3.82644	573.898	7.96785e-127	2.0439e-125	2.13957	2.89383	15.3867	3.09647e-41	1.31861e-40	82.5682
CST1	1490.06	7.95519	0.315407	25.222	2.29993e-140	5.12194e-139	7.08993	5.24195	267.936	3.1972e-60	1.70804e-59	9.42324	-0.121314	21.3471	1.68641e-65	1.83502e-64	138.524
LGR6	237.914	4.4396	0.176054	25.2173	2.5902e-140	5.7632e-139	4.39085	2.58512	489.353	1.97009e-108	3.16426e-107	3.89601	0.267142	15.8531	4.10644e-43	1.86225e-42	87.1174
MMP13	65.7283	7.58639	0.300855	25.2161	2.66595e-140	5.92642e-139	7.854	1.50598	397.302	2.1292e-88	2.16326e-87	5.28458	-2.81859	21.4675	5.48671e-66	6.09304e-65	139.645
C1orf233	183.316	2.80076	0.111143	25.1995	4.05362e-140	8.97907e-139	2.76121	2.21224	567.665	1.80779e-125	4.51601e-124	2.63096	1.20288	22.8946	9.74003e-72	1.40124e-70	152.793
FAM26E	163.3	2.70439	0.107412	25.1778	7.01088e-140	1.54744e-138	2.70301	2.08514	550.955	7.8035e-122	1.7925e-120	2.56119	1.1116	21.4512	6.38875e-66	7.07894e-65	139.431
COX6B2	143.121	4.49083	0.178409	25.1715	8.21446e-140	1.81148e-138	4.43584	1.88984	487.229	5.71086e-108	9.10181e-107	3.60322	-0.455529	15.2088	1.60085e-40	6.65285e-40	81.2119
PALLD	5168.22	2.49907	0.0993672	25.1498	1.41878e-139	3.11491e-138	2.52756	7.04654	542.978	4.24206e-120	9.21562e-119	2.40857	6.18678	24.4228	8.10575e-78	1.58483e-76	166.571
PODNL1	232.196	3.20204	0.127338	25.1459	1.5651e-139	3.43313e-138	3.18525	2.56683	532.486	8.13089e-118	1.66171e-116	2.89675	1.27224	18.0527	4.63721e-52	2.8895e-51	107.585
DEPDC1	72.9424	3.99247	0.158791	25.143	1.68682e-139	3.69685e-138	3.96979	0.950199	513.625	1.0317e-113	1.91609e-112	4.40115	-0.999074	24.7437	4.40688e-79	9.3368e-78	169.679
DQX1	78.8862	4.9638	0.197429	25.1422	1.72092e-139	3.76827e-138	4.89485	1.03612	483.757	3.25264e-107	5.08925e-106	3.64111	-1.56258	13.8359	4.42704e-35	1.54111e-34	68.7971
BIRC5	285.971	3.57639	0.142256	25.1406	1.79152e-139	3.9194e-138	3.59431	2.84924	561.515	3.93602e-124	9.50734e-123	3.64185	1.23079	20.2489	4.9245e-61	4.43849e-60	128.211
FOXC2	75.1439	4.17574	0.166103	25.1394	1.84559e-139	4.03415e-138	3.74601	1.00589	370.27	1.63418e-82	1.44923e-81	3.65128	-1.03531	20.1318	1.47804e-60	1.30377e-59	127.186
ADAMTS6	76.8004	3.04708	0.121293	25.1217	2.87885e-139	6.28161e-138	3.01917	1.02019	550.337	1.06322e-121	2.42877e-120	3.09989	-0.214943	23.0982	1.4901e-72	2.23434e-71	154.702
ARL4C	1966.86	2.7436	0.109234	25.1168	3.25612e-139	7.09856e-138	2.76531	5.64569	551.754	5.22974e-122	1.20687e-120	2.55933	4.6475	24.0674	2.06381e-76	3.74335e-75	163.364
VCAN	8426.72	3.9145	0.156015	25.0905	6.31447e-139	1.37298e-137	3.93932	7.76323	489.013	2.33629e-108	3.74516e-107	4.25752	5.87347	26.3318	2.84047e-85	8.57007e-84	183.785
HLA-H	777.802	2.74554	0.109441	25.0869	6.90404e-139	1.49986e-137	2.76225	4.3077	553.327	2.37848e-122	5.55597e-121	2.62226	3.32948	23.1417	9.98477e-73	1.5127e-71	154.956
IYD	279.932	4.53055	0.18065	25.0792	8.39032e-139	1.81639e-137	4.51247	2.84771	474.648	3.12068e-105	4.67368e-104	4.05602	0.402721	14.3335	4.8805e-37	1.80985e-36	73.1789
KPNA7	45.7959	4.25885	0.169935	25.0617	1.30313e-138	2.81375e-137	4.19367	0.302628	514.796	5.73707e-114	1.07353e-112	3.95726	-1.70478	19.9197	1.08389e-59	9.22347e-59	125.211
P4HA3	169.122	3.43655	0.137189	25.0497	1.75911e-138	3.79501e-137	3.41639	2.12145	532.618	7.60919e-118	1.55766e-116	3.2526	0.630484	18.0454	4.96562e-52	3.08639e-51	107.559
CDH13	168.146	2.975	0.118788	25.0447	1.99367e-138	4.29729e-137	2.97714	2.12336	543.613	3.08578e-120	6.75092e-119	2.86418	0.949419	20.9891	4.78441e-64	4.89904e-63	135.135
CKMT1A	528.853	2.69984	0.107803	25.0443	2.01663e-138	4.34148e-137	2.71728	3.7441	564.344	9.54291e-125	2.33688e-123	2.20446	2.79011	15.5616	6.13954e-42	2.67928e-41	84.1939
FAM72A	48.5014	2.67657	0.106896	25.039	2.2984e-138	4.93698e-137	2.61353	0.373108	575.046	4.48445e-127	1.15872e-125	2.69976	-0.616767	22.4458	6.17063e-70	8.21571e-69	148.699
SPC24	99.0952	3.24909	0.129805	25.0304	2.85089e-138	6.11316e-137	3.19654	1.33663	547.154	5.23791e-121	1.17385e-119	3.20008	-0.0128639	21.6291	1.21682e-66	1.38537e-65	141.128
TRIP13	131.388	2.59347	0.103712	25.0064	5.20472e-138	1.10934e-136	2.59207	1.75635	564.88	7.29486e-125	1.79523e-123	2.13335	0.857195	16.748	9.7143e-47	4.96124e-46	95.3851
HOXA13	93.241	7.44169	0.297665	25.0002	6.08836e-138	1.29657e-136	7.34939	1.28281	434.963	1.3512e-96	1.67591e-95	4.9783	-2.64049	14.368	3.56507e-37	1.33099e-36	73.6236
ZBTB7C	319.865	2.92905	0.117178	24.9966	6.65244e-138	1.41548e-136	2.9329	3.03022	539.69	2.2028e-119	4.70316e-118	2.5656	1.91427	17.2222	1.13886e-48	6.2481e-48	99.7434
CENPU	164.764	2.3827	0.0953823	24.9805	9.95295e-138	2.11413e-136	2.3883	2.08412	563.47	1.47866e-124	3.59614e-123	2.04327	1.30432	17.4207	1.76611e-49	9.98956e-49	101.641
CCNA2	231.136	2.36391	0.0946626	24.9719	1.23476e-137	2.62054e-136	2.38071	2.5674	565.416	5.5788e-125	1.37838e-123	2.07551	1.80292	18.9216	1.29831e-55	9.30133e-55	115.693
HR	331.36	2.75774	0.110465	24.9648	1.47483e-137	3.12469e-136	2.75866	3.06503	557.827	2.49698e-123	5.93893e-122	2.21966	2.0788	16.8844	2.70618e-47	1.41349e-46	96.5593
BGN	19334.7	2.93154	0.117437	24.9625	1.56089e-137	3.30423e-136	2.93849	8.93662	516.862	2.03828e-114	3.86356e-113	3.3252	7.95729	25.1221	1.44068e-80	3.33709e-79	172.967
NAGS	110.598	2.61059	0.104634	24.9497	2.15172e-137	4.55105e-136	2.5884	1.51802	552.329	3.9199e-122	9.10524e-121	2.20986	0.608059	17.8688	2.61565e-51	1.57682e-50	105.895
SMIM24	848.086	3.92955	0.157575	24.9377	2.90397e-137	6.12646e-136	3.93912	4.43453	494.332	1.6266e-109	2.69267e-108	3.35569	2.51152	15.5841	4.98095e-42	2.17559e-41	84.4707
SIM2	147.079	2.99652	0.120167	24.9363	3.00492e-137	6.33406e-136	2.99629	1.92176	544.744	1.75142e-120	3.85546e-119	2.1863	0.771824	13.7262	1.18858e-34	4.08947e-34	67.6611
FN1	63373.5	4.09877	0.164437	24.9261	3.88169e-137	8.16833e-136	4.12051	10.6679	465.911	2.48642e-103	3.57294e-102	5.16108	8.97269	26.8678	2.45792e-87	8.53603e-86	188.587
CSF2	16.5555	6.07476	0.243767	24.9204	4.47772e-137	9.41458e-136	4.87177	-1.01586	329.016	1.57429e-73	1.12752e-72	4.24038	-3.36597	24.0779	1.87398e-76	3.41149e-75	163.61
HLA-DRB1	5069.75	3.11284	0.124918	24.9191	4.61426e-137	9.69345e-136	3.13232	7.01287	523.38	7.78277e-116	1.5277e-114	2.87612	5.7626	21.6393	1.10562e-66	1.2605e-65	140.956
ASPN	1619.75	3.38278	0.135765	24.9164	4.94471e-137	1.03789e-135	3.39741	5.37169	506.871	3.04106e-112	5.40921e-111	3.21533	3.92407	21.9817	4.57306e-68	5.55819e-67	144.223
AXL	1479.07	2.4244	0.0973034	24.9159	5.00721e-137	1.05012e-135	2.45531	5.24032	550.038	1.23517e-121	2.80864e-120	2.14689	4.44356	22.2796	2.87651e-69	3.69703e-68	146.915
CDT1	169.982	2.96122	0.118883	24.9086	5.99679e-137	1.25553e-135	2.93987	2.11159	549.395	1.70425e-121	3.86115e-120	2.71373	0.96231	19.5015	5.53116e-58	4.37542e-57	121.207
DSG3	256.676	5.43758	0.218381	24.8995	7.52586e-137	1.57302e-135	4.45536	2.7524	265.758	9.53668e-60	5.03413e-59	3.29729	-0.568212	9.84235	2.3484e-20	5.26243e-20	35.0691
C16orf54	141.837	3.9222	0.157587	24.8892	9.75022e-137	2.03281e-135	3.42721	1.88864	338.514	1.34428e-75	1.00572e-74	3.16511	-0.00194738	17.1654	1.94137e-48	1.05415e-47	99.3455
SLC1A1	724.082	2.87399	0.115504	24.8822	1.16074e-136	2.41595e-135	2.90507	4.2149	538.813	3.41737e-119	7.24033e-118	2.26288	3.13835	15.429	2.09491e-41	8.96722e-41	82.9438
GPR1	29.7672	4.79232	0.192704	24.8688	1.61739e-136	3.36079e-135	4.72019	-0.26488	528.79	5.17794e-117	1.04024e-115	4.09352	-2.45454	22.5961	1.53471e-70	2.09387e-69	150.078
SULT2B1	177.232	3.86115	0.155289	24.8644	1.80853e-136	3.75482e-135	3.81505	2.17146	500.926	5.97725e-111	1.02714e-109	3.36455	0.334206	16.1592	2.37632e-44	1.11776e-43	89.9497
TGFBI	5728.6	3.25836	0.131227	24.83	4.25332e-136	8.79384e-135	3.27521	7.18641	514.467	6.76442e-114	1.26291e-112	2.95282	5.808	23.2673	3.14463e-73	4.88944e-72	156.022
GCNT1	571.528	2.74463	0.110642	24.8063	7.65774e-136	1.5767e-134	2.77924	3.87666	539.241	2.75786e-119	5.86808e-118	2.32131	2.87966	19.108	2.24476e-56	1.6599e-55	117.367
GDA	801.521	3.25933	0.131403	24.8041	8.10273e-136	1.66693e-134	3.27787	4.35685	514.629	6.24013e-114	1.1659e-112	2.80278	2.99621	13.6009	3.66463e-34	1.24024e-33	66.3541
TIGIT	90.0629	4.10377	0.165487	24.7981	9.39402e-136	1.92779e-134	3.12049	1.2974	223.797	1.34361e-50	5.75824e-50	3.88951	-0.761508	20.4261	9.33334e-62	8.70283e-61	129.933
FOXA1	168.687	3.2945	0.132864	24.7961	9.88478e-136	2.02683e-134	3.28755	2.11932	526.481	1.64626e-116	3.26243e-115	2.73659	0.744384	13.567	4.96613e-34	1.67387e-33	66.2468
TREM1	159.782	3.92002	0.158101	24.7945	1.02855e-135	2.10726e-134	3.3475	2.08817	301.857	1.29748e-67	8.15432e-67	3.87477	0.137821	18.2023	1.13409e-52	7.23362e-52	109.058
C2	778.175	3.36382	0.13574	24.7814	1.42353e-135	2.91406e-134	3.36184	4.30127	508.707	1.21208e-112	2.18411e-111	3.38784	2.8641	24.3144	2.17334e-77	4.14805e-76	165.725
LEF1	391.625	3.77461	0.152348	24.7762	1.61868e-135	3.30811e-134	3.76549	3.33077	493.578	2.37272e-109	3.90179e-108	4.51012	1.51728	28.6311	5.09337e-94	2.77963e-92	203.983
UGT1A6	172.549	6.08003	0.245413	24.7747	1.67889e-135	3.42551e-134	5.98616	2.17258	430.129	1.5232e-95	1.84141e-94	5.36279	-1.36572	18.4738	8.79674e-54	5.8373e-53	111.655
CTSB	22812.1	2.1061	0.0850103	24.7747	1.68055e-135	3.42609e-134	2.12682	9.16816	549.917	1.31207e-121	2.98078e-120	2.22244	8.72658	23.6688	7.8929e-75	1.33507e-73	159.786
FCHO1	205.501	2.80733	0.113321	24.7732	1.74324e-135	3.54807e-134	2.79513	2.3897	547.364	4.71396e-121	1.05738e-119	2.67286	1.34762	21.6431	1.06754e-66	1.22045e-65	141.206
PTGER2	168.62	2.86738	0.115764	24.7691	1.92909e-135	3.91991e-134	2.8511	2.12181	535.185	2.10379e-118	4.38248e-117	2.67361	1.02827	20.1398	1.37071e-60	1.21038e-59	127.188
GRAMD1B	630.671	2.60078	0.105012	24.7665	2.0611e-135	4.17789e-134	2.62924	4.01461	538.411	4.17846e-119	8.82272e-118	2.11633	3.1246	17.0551	5.46595e-48	2.92196e-47	98.0632
COL1A1	124757	4.30533	0.173904	24.757	2.60741e-135	5.27665e-134	4.302	11.6292	446.798	3.58891e-99	4.70767e-98	6.16625	9.925	30.7813	5.99006e-102	5.87902e-100	222.201
ESCO2	54.9943	2.90794	0.117617	24.7237	5.9475e-135	1.19872e-133	2.87816	0.557265	537.437	6.80741e-119	1.43371e-117	2.89228	-0.592656	20.0904	2.18e-60	1.90806e-59	126.789
IL4I1	150.514	3.36254	0.136016	24.7216	6.26632e-135	1.26195e-133	2.55756	2.03021	215.707	7.81466e-49	3.21961e-48	3.14965	0.529138	19.8481	2.12381e-59	1.78465e-58	124.483
OLFML2B	1314.53	3.96177	0.16027	24.7194	6.61382e-135	1.33086e-133	3.95701	5.06951	477.153	8.89661e-106	1.3462e-104	4.56403	3.09026	28.1388	3.60399e-92	1.74106e-90	199.723
PTGS2	593.523	4.48513	0.181577	24.701	1.04229e-134	2.09057e-133	4.49079	3.91693	469.895	3.37814e-104	4.95174e-103	4.2265	1.42856	17.7227	1.03392e-50	6.10252e-50	104.504
FOLH1	85.2864	3.79496	0.153671	24.6953	1.20027e-134	2.40354e-133	4.56913	1.93688	474.522	3.32443e-105	4.96984e-104	3.24732	-0.566718	19.3766	1.79169e-57	1.38812e-56	120.1
CARD16	189.037	2.56363	0.103879	24.6789	1.80048e-134	3.59387e-133	2.55495	2.27764	543.65	3.0302e-120	6.63518e-119	2.65038	1.38969	26.1599	1.31195e-84	3.78362e-83	182.361
CTSS	3203.82	2.94147	0.119209	24.6748	1.99291e-134	3.97159e-133	2.96024	6.35033	521.388	2.11171e-115	4.10296e-114	2.99584	5.19533	26.4155	1.35027e-85	4.15471e-84	184.5
BIRC7	65.9457	5.95576	0.241412	24.6705	2.22025e-134	4.42109e-133	5.46572	0.789621	370.534	1.4322e-82	1.27237e-81	4.89493	-2.32005	21.0234	3.47323e-64	3.57117e-63	135.517
CRYM	46.9826	4.0948	0.166081	24.6555	3.21496e-134	6.38645e-133	3.99977	0.300723	506.825	3.11161e-112	5.53074e-111	3.39681	-1.58635	20.5438	3.09584e-62	2.94645e-61	131.044
AURKB	128.305	3.64792	0.148002	24.6478	3.88422e-134	7.7036e-133	3.59124	1.709	506.203	4.24875e-112	7.50894e-111	3.81465	0.0133885	22.7952	2.43821e-71	3.44583e-70	151.913
RPL39L	109.219	2.71742	0.110284	24.6401	4.6965e-134	9.30716e-133	2.69193	1.49364	540.872	1.21831e-119	2.62147e-118	2.20054	0.517526	16.7049	1.45306e-46	7.37703e-46	95.0091
RP3-340N1.2	75.0499	5.76564	0.234086	24.6304	5.96249e-134	1.17972e-132	5.20999	0.968247	350.588	3.15544e-78	2.51938e-77	4.34501	-2.1494	16.9957	9.5383e-48	5.06405e-47	97.8368
TFF2	3640.17	6.31705	0.256529	24.6251	6.79581e-134	1.34139e-132	6.31889	6.5388	382.639	3.31505e-85	3.14064e-84	6.02004	1.93913	12.9171	1.60707e-31	5.03281e-31	60.4929
RAB34	962.194	2.40334	0.0976486	24.6122	9.36115e-134	1.84481e-132	2.40332	4.59818	547.591	4.20811e-121	9.45626e-120	2.09256	3.84264	21.1271	1.31728e-64	1.37492e-63	136.223
SLC52A3	271.734	2.59659	0.105513	24.6092	1.00691e-133	1.98118e-132	2.59669	2.78187	552.698	3.25945e-122	7.58532e-121	2.14111	1.89158	15.4158	2.36695e-41	1.01177e-40	82.9293
NRG3	88.2739	4.60313	0.187056	24.6083	1.02985e-133	2.02472e-132	4.5403	1.21312	466.303	2.04308e-103	2.93926e-102	4.35763	-1.20442	19.0477	3.95821e-56	2.89674e-55	117.033
TSPAN15	2157.31	2.35131	0.0955587	24.606	1.09086e-133	2.14297e-132	2.36264	5.76402	551.447	6.09918e-122	1.40557e-120	2.04701	4.99761	22.2961	2.46836e-69	3.18564e-68	147.041
LUM	17714.8	3.39833	0.138114	24.6053	1.10986e-133	2.17685e-132	3.40795	8.82	481.641	9.3892e-107	1.45806e-105	3.80251	7.46989	24.3106	2.24949e-77	4.28681e-76	165.608
CXCL16	2268.52	2.06135	0.0837979	24.5991	1.2921e-133	2.5263e-132	2.08	5.84096	557.187	3.43987e-123	8.15032e-122	2.00499	5.22807	27.7335	1.22852e-90	5.27775e-89	196.071
UCA1	417.141	5.16617	0.210052	24.5947	1.43928e-133	2.80744e-132	5.15307	3.44067	429.395	2.20041e-95	2.65235e-94	4.1322	0.279513	12.4374	1.07481e-29	3.18671e-29	56.3641
RP11-289I10.2	37.1168	2.22758	0.090583	24.5916	1.55414e-133	3.02673e-132	2.18266	0.0264908	558.676	1.63185e-123	3.88871e-122	2.18455	-0.713201	22.4448	6.22505e-70	8.28372e-69	148.691
RP11-357H14.17	51.5065	7.23607	0.294337	24.5843	1.86007e-133	3.61971e-132	7.1564	0.437142	478.722	4.05396e-106	6.22534e-105	5.07113	-2.89862	17.421	1.76237e-49	9.9707e-49	101.816
ISLR	4294.86	3.41575	0.138992	24.5751	2.33133e-133	4.52968e-132	3.41377	6.76531	490.201	1.2882e-108	2.08116e-107	3.5658	5.25379	27.417	1.95961e-89	7.77301e-88	193.351
TFF1	6941.34	7.00101	0.284907	24.5729	2.46099e-133	4.77785e-132	6.97773	7.43062	360.539	2.14884e-80	1.80446e-79	8.26044	2.03944	17.2176	1.18916e-48	6.51834e-48	99.8278
KCND2	94.5191	3.23474	0.131649	24.571	2.5778e-133	5.00073e-132	3.22233	1.31791	511.709	2.69376e-113	4.94373e-112	3.04675	-0.0699331	19.3224	2.98305e-57	2.2883e-56	119.575
SUCNR1	118.566	4.50546	0.18338	24.569	2.70964e-133	5.25239e-132	4.464	1.62381	464.992	3.93994e-103	5.62903e-102	3.85692	-0.774615	18.0607	4.30112e-52	2.68412e-51	107.763
LGALS1	6143.64	2.7991	0.114072	24.5381	5.79636e-133	1.11833e-131	2.80168	7.27331	518.602	8.52477e-115	1.6283e-113	2.69455	6.2176	25.2943	3.05467e-81	7.33564e-80	174.458
FOXD1	42.9011	4.78739	0.195173	24.529	7.24423e-133	1.39443e-131	4.67345	0.209066	482.339	6.61928e-107	1.03049e-105	4.02979	-2.10092	18.5589	3.94968e-54	2.65784e-53	112.466
LINC00152	425.361	2.53901	0.103539	24.5221	8.57793e-133	1.64732e-131	2.53296	3.4211	544.308	2.17897e-120	4.77547e-119	2.32336	2.57632	21.2447	4.38924e-65	4.68166e-64	137.415
CASC8	20.9762	5.4121	0.220769	24.5147	1.02865e-132	1.97391e-131	5.26734	-0.766693	570.268	4.91035e-126	1.24038e-124	4.1213	-2.97115	22.1366	1.08492e-68	1.35579e-67	145.836
SEMA7A	1015.28	3.92556	0.160448	24.4663	3.37672e-132	6.43495e-131	3.93521	4.68967	478.236	5.17166e-106	7.89776e-105	4.1215	2.7282	22.6492	9.38822e-71	1.29223e-69	150.492
LOXL2	1767.85	2.82608	0.115554	24.4568	4.2651e-132	8.12169e-131	2.86084	5.49226	531.274	1.49176e-117	3.02629e-116	2.30005	4.4102	20.2741	3.88654e-61	3.51445e-60	128.214
UBE2MP1	10.0041	3.00404	0.122876	24.4477	5.31806e-132	1.01112e-130	2.93504	-1.66749	719.551	1.67607e-158	1.06169e-156	2.95549	-2.71545	24.8791	1.29356e-79	2.81512e-78	170.855
NR1I2	195.825	4.04896	0.165632	24.4456	5.60841e-132	1.06551e-130	4.02596	2.33215	478.406	4.74945e-106	7.27087e-105	2.84889	0.320533	10.8843	5.55338e-24	1.38994e-23	43.2795
SLC9B2	532.924	2.50575	0.102512	24.4435	5.8981e-132	1.11969e-130	2.54055	3.77158	534.835	2.50683e-118	5.21333e-117	2.16024	2.9168	17.9151	1.69198e-51	1.02723e-50	106.148
LRRC66	140.492	3.43248	0.140434	24.4418	6.14653e-132	1.16596e-130	3.41263	1.86364	497.36	3.56741e-110	6.02191e-109	2.48584	0.359264	13.6658	2.0462e-34	6.98215e-34	67.1576
SULT1E1	91.2392	5.67435	0.232315	24.4253	9.21938e-132	1.74487e-130	5.62147	1.25884	427.997	4.43406e-95	5.31125e-94	4.35463	-1.9546	15.3562	4.10692e-41	1.74026e-40	82.6303
ADAM28	1293.44	3.05561	0.125295	24.3873	2.3341e-131	4.39409e-130	3.08001	5.04264	509.57	7.86553e-113	1.42561e-111	2.59513	3.82176	17.7054	1.2157e-50	7.16184e-50	104.13
AREG	556.308	4.00752	0.164372	24.3808	2.7359e-131	5.14271e-130	4.0266	3.83924	473.003	7.11539e-105	1.05671e-103	3.88595	1.76449	17.332	4.06434e-49	2.2679e-48	100.816
LOXL1	1013.95	2.42425	0.0995093	24.3621	4.31703e-131	8.07199e-130	2.43366	4.67653	539.537	2.37772e-119	5.06792e-118	2.1769	3.89334	22.4536	5.73851e-70	7.65268e-69	148.556
HOPX	924.905	3.24528	0.133304	24.3449	6.56089e-131	1.22307e-129	3.24202	4.5544	490.972	8.75773e-109	1.41947e-107	3.46944	3.18883	26.3243	3.03599e-85	9.14886e-84	183.778
DOK5	146.422	3.27248	0.134445	24.3407	7.26841e-131	1.35395e-129	3.25884	1.93108	496.385	5.81525e-110	9.76326e-109	3.30503	0.511898	20.5362	3.32516e-62	3.16349e-61	130.926
ENTPD2	374.566	2.55202	0.104859	24.3375	7.85607e-131	1.46232e-129	2.54293	3.24095	526.416	1.70108e-116	3.36838e-115	2.08456	2.37719	16.6252	3.06529e-46	1.5414e-45	94.1082
EGLN3	1439.56	3.51994	0.144729	24.3209	1.1781e-130	2.18308e-129	3.54872	5.19023	493.896	2.02304e-109	3.3356e-108	2.64812	3.56835	15.7674	9.10294e-43	4.08374e-42	86.0544
CBR3	106.432	2.27168	0.0934132	24.3186	1.24595e-130	2.30538e-129	2.23164	1.44585	548.161	3.16288e-121	7.13329e-120	2.07816	0.731925	22.6125	1.31846e-70	1.80478e-69	150.208
SP6	114.91	2.58172	0.106171	24.3168	1.30321e-130	2.40774e-129	2.57649	1.57457	532.76	7.08785e-118	1.45333e-116	2.04231	0.67516	16.2998	6.40575e-45	3.07484e-44	91.2224
BLM	87.0334	2.49557	0.102726	24.2934	2.30033e-130	4.22482e-129	2.48235	1.18197	534.605	2.81263e-118	5.8395e-117	2.47613	0.27847	22.2059	5.69856e-69	7.2084e-68	146.467
BCL11B	150.261	3.21637	0.132497	24.2751	3.59476e-130	6.57785e-129	3.20638	1.95853	503.103	2.00823e-111	3.50185e-110	3.3847	0.578693	22.2651	3.29058e-69	4.22483e-68	147.01
LRRC31	63.9053	6.47786	0.266932	24.2679	4.28456e-130	7.82278e-129	6.36839	0.751586	428.882	2.84626e-95	3.4242e-94	4.63772	-2.64219	17.1699	1.86152e-48	1.01212e-47	99.4699
CD27	132.66	3.63827	0.149975	24.2593	5.28112e-130	9.63524e-129	2.48631	1.88083	162.437	3.32103e-37	1.05399e-36	2.94104	0.149195	16.7266	1.18676e-46	6.04232e-46	95.238
RP11-1398P2.1	32.7086	2.70256	0.111417	24.2562	5.68213e-130	1.03593e-128	2.63795	-0.176286	546.605	6.89508e-121	1.53967e-119	2.57285	-1.16334	22.7026	5.73484e-71	7.97769e-70	151.068
MYH16	45.5051	6.28586	0.259372	24.2349	9.54016e-130	1.73166e-128	6.2039	0.312991	463.699	7.53328e-103	1.0683e-101	4.85992	-2.76077	23.3053	2.21759e-73	3.47852e-72	156.585
RHOH	150.61	3.36581	0.138939	24.2251	1.21148e-129	2.19739e-128	2.45764	2.04261	188.865	5.62529e-43	2.02937e-42	2.80263	0.512401	17.45	1.34208e-49	7.62244e-49	101.979
METTL7B	311.525	2.70969	0.111865	24.2228	1.27862e-129	2.3141e-128	2.71821	2.98272	527.791	8.54265e-117	1.70929e-115	2.27572	2.00065	15.3729	3.51767e-41	1.49465e-40	82.5272
ST6GALNAC5	148.73	3.51677	0.145191	24.2216	1.31739e-129	2.38252e-128	3.4969	1.9474	484.498	2.24339e-107	3.53014e-106	2.86347	0.340149	18.0471	4.88772e-52	3.04025e-51	107.587
DHDH	25.973	4.22767	0.174618	24.2109	1.708e-129	3.08221e-128	3.25865	-0.420922	239.734	4.49521e-54	2.07898e-53	3.93781	-2.35501	22.2402	4.14854e-69	5.28268e-68	146.798
ADAM19	804.888	3.21303	0.132819	24.1911	2.76053e-129	4.96716e-128	3.2326	4.36247	492.728	3.63309e-109	5.93509e-108	3.20611	3.01167	22.0742	1.93548e-68	2.39006e-67	145.131
WFDC2	2299.11	3.59586	0.148658	24.1888	2.92201e-129	5.2501e-128	3.56806	5.82559	480.356	1.78732e-106	2.76345e-105	3.00708	4.17008	18.6991	1.05465e-54	7.24229e-54	113.465
AEBP1	14587	3.07308	0.127058	24.1864	3.09083e-129	5.54941e-128	3.08206	8.5285	485.296	1.50442e-107	2.37786e-106	3.14227	7.36437	23.212	5.23141e-73	8.03347e-72	155.546
NMUR2	56.9925	7.29894	0.301818	24.1832	3.34085e-129	5.99398e-128	7.23556	0.610647	441.548	4.98483e-98	6.37704e-97	4.74202	-3.00164	16.895	2.44988e-47	1.28285e-46	96.9095
DMBT1	4885.04	5.35302	0.221434	24.1743	4.14274e-129	7.41661e-128	5.38229	6.97556	403.585	9.13164e-90	9.60796e-89	4.59573	3.43582	12.8553	2.76972e-31	8.60592e-31	59.8077
IGKV1D-39	876.844	5.49717	0.227481	24.1654	5.14736e-129	9.18865e-128	5.10441	4.51189	330.31	8.22847e-74	5.93267e-73	5.0114	0.885044	13.8329	4.54901e-35	1.58247e-34	68.6508
F5	1181.01	3.83889	0.158863	24.1647	5.22898e-129	9.32765e-128	3.82991	4.89037	468.803	5.83812e-104	8.50742e-103	3.11552	3.00477	15.5434	7.26335e-42	3.16415e-41	84.0488
THY1	4759.37	3.17303	0.131384	24.1509	7.31216e-129	1.3025e-127	3.17234	6.91271	486.23	9.42016e-108	1.49656e-106	3.38178	5.56464	26.2917	4.05677e-85	1.21074e-83	183.404
SERPINH1	6435.38	2.52848	0.104779	24.1317	1.16321e-128	2.06755e-127	2.54842	7.34251	520.435	3.40362e-115	6.58219e-114	2.43744	6.44819	24.9364	7.70946e-80	1.70923e-78	171.229
DUOXA1	115.05	3.95674	0.16399	24.1279	1.27394e-128	2.26113e-127	3.87849	1.55607	467.89	9.2219e-104	1.33521e-102	3.34781	-0.367831	15.9954	1.09332e-43	5.03397e-43	88.4657
PPP1R3G	53.2573	3.05516	0.126652	24.1226	1.44973e-128	2.5713e-127	3.0169	0.510178	512.302	2.00124e-113	3.68094e-112	2.84845	-0.734254	20.7893	3.1039e-63	3.07799e-62	133.323
ERN2	1378.32	4.88965	0.203018	24.0848	3.60335e-128	6.36378e-127	4.88601	5.12184	419.893	2.57472e-93	2.94757e-92	5.37603	2.15683	14.7842	7.94911e-39	3.12465e-38	77.213
RP1-122P22.4	82.406	4.09888	0.170234	24.0779	4.25574e-128	7.48931e-127	3.9969	1.07912	464.737	4.47827e-103	6.38346e-102	2.96592	-0.903268	14.3546	4.02935e-37	1.50162e-36	73.4388
ANGPTL2	1355.09	2.67324	0.111025	24.0778	4.26981e-128	7.50875e-127	2.69544	5.10646	515.422	4.19434e-114	7.87818e-113	2.37268	4.13823	22.0072	3.60666e-68	4.41167e-67	144.413
GPR132	184.37	3.00389	0.124761	24.0771	4.34018e-128	7.62711e-127	2.99222	2.24202	503.508	1.63959e-111	2.86305e-110	3.04551	1.03343	21.9575	5.72532e-68	6.93152e-67	144.143
GJC2	124.14	3.24475	0.134789	24.0728	4.82168e-128	8.45531e-127	3.22043	1.68345	492.248	4.62009e-109	7.52272e-108	2.46509	0.311604	15.4311	2.05372e-41	8.79544e-41	83.208
ESM1	206.841	3.87791	0.161104	24.0709	5.04599e-128	8.84241e-127	3.88921	2.42086	468.596	6.47512e-104	9.41357e-103	4.18843	0.436662	20.9391	7.6419e-64	7.78007e-63	134.696
CRISPLD1	169.878	3.38017	0.140481	24.0614	6.34563e-128	1.10886e-126	3.36142	2.14629	478.919	3.67321e-106	5.65464e-105	3.66476	0.620477	22.9979	3.75729e-72	5.51077e-71	153.767
LBH	2503.14	2.31092	0.0960635	24.0561	7.20147e-128	1.25664e-126	2.33272	5.99167	516.526	2.41135e-114	4.56723e-113	2.26351	5.22971	25.5872	2.19661e-82	5.58853e-81	177.082
HECW1	36.2822	4.20934	0.175129	24.0357	1.17881e-127	2.05412e-126	4.15449	-0.0141028	489.657	1.69215e-108	2.72489e-107	3.87707	-2.00687	21.2351	4.80204e-65	5.10443e-64	137.487
SERPINB7	78.6901	5.34691	0.222467	24.0346	1.20834e-127	2.10261e-126	5.29638	1.0556	426.671	8.61927e-95	1.02209e-93	4.65579	-1.88513	18.0503	4.74313e-52	2.95401e-51	107.695
OAS3	1458.34	2.615	0.108873	24.019	1.76284e-127	3.06105e-126	2.64496	5.22122	509.34	8.82706e-113	1.59756e-111	2.40385	4.27581	23.1807	6.97376e-73	1.06432e-71	155.254
RP11-395B7.4	24.3348	4.96376	0.206681	24.0165	1.87075e-127	3.24389e-126	4.86032	-0.564958	541.263	1.00157e-119	2.15885e-118	4.64591	-2.73446	28.556	9.73151e-94	5.23037e-92	203.198
HLA-B	28484.2	2.30332	0.0959215	24.0125	2.05775e-127	3.5607e-126	2.3198	9.48983	504.487	1.00381e-111	1.75903e-110	2.65805	8.9893	23.2837	2.70397e-73	4.22544e-72	156.271
NEIL3	18.523	3.67219	0.152932	24.012	2.08374e-127	3.60315e-126	3.62613	-0.896956	547.902	3.60063e-121	8.10583e-120	3.90162	-2.48223	26.7955	4.65513e-87	1.58998e-85	187.911
CCAT1	38.0809	6.3817	0.26586	24.004	2.5248e-127	4.36279e-126	6.25394	0.0785675	454.644	7.03741e-101	9.57512e-100	4.67584	-2.92338	19.8547	1.99595e-59	1.68005e-58	124.61
CAPN9	285.068	5.66101	0.236314	23.9555	8.09828e-127	1.39065e-125	5.63855	2.86421	393.257	1.61752e-87	1.61174e-86	5.50077	-0.767659	16.3179	5.41113e-45	2.60597e-44	91.4837
TINAG	26.3427	6.86336	0.286566	23.9503	9.16637e-127	1.57189e-125	7.05084	-0.442038	481.104	1.22889e-106	1.90478e-105	4.29481	-3.38927	17.7955	5.21007e-51	3.10317e-50	105.328
MUC12	76.5483	3.89795	0.162754	23.9499	9.25196e-127	1.58547e-125	4.23051	1.35122	456.38	2.94836e-101	4.04256e-100	3.75363	-0.882291	20.7081	6.64327e-63	6.48934e-62	132.568
KRT20	370.956	7.86096	0.328291	23.9451	1.03969e-126	1.78045e-125	4.80625	3.76518	112.813	2.37076e-26	5.84475e-26	3.38744	-2.41443	8.78168	7.09326e-17	1.42895e-16	27.2628
RP11-486A14.1	14.1827	5.37018	0.224354	23.9362	1.28559e-126	2.197e-125	5.29834	-1.24103	597.052	7.32851e-132	2.15354e-130	4.18569	-3.28738	23.4505	5.84037e-74	9.42315e-73	157.901
TK1	588.402	2.50255	0.104569	23.9321	1.41807e-126	2.41842e-125	2.51446	3.88692	530.473	2.22905e-117	4.50728e-116	2.00961	3.03198	15.6969	1.7512e-42	7.78029e-42	85.4161
IFI16	2489.96	2.20886	0.0923049	23.93	1.49131e-126	2.54158e-125	2.23492	5.9854	513.911	8.94024e-114	1.66164e-112	2.05622	5.28294	22.1753	7.57067e-69	9.51834e-68	145.915
LUZP2	32.4844	5.24717	0.219303	23.9265	1.62147e-126	2.75773e-125	5.18854	-0.139704	481.908	8.21304e-107	1.27781e-105	4.39483	-2.64626	23.0576	2.16604e-72	3.22259e-71	154.317
PRSS33	31.2009	7.11925	0.297731	23.9117	2.31502e-126	3.92652e-125	7.81035	0.274148	435.854	8.64396e-97	1.07534e-95	4.15976	-3.42377	17.2486	8.88863e-49	4.89062e-48	100.216
UNC5B-AS1	39.973	4.64516	0.19452	23.8801	4.92661e-126	8.30776e-125	4.52461	0.0803571	463.748	7.34817e-103	1.04264e-101	3.57956	-2.16411	16.5144	8.63387e-46	4.27067e-45	93.3542
GLI2	225.627	2.60382	0.109037	23.8801	4.92825e-126	8.30776e-125	2.61163	2.54164	499.894	1.00242e-110	1.71545e-109	2.50235	1.60656	18.7662	5.60683e-55	3.89763e-54	114.256
CTHRC1	1966.49	4.24683	0.177854	23.8782	5.1573e-126	8.68798e-125	4.23618	5.64443	434.646	1.58406e-96	1.96081e-95	5.10659	3.29542	28.0648	6.85936e-92	3.26919e-90	199.083
SGCD	307.781	3.00288	0.125783	23.8735	5.77487e-126	9.71516e-125	3.02097	2.99655	482.984	4.79098e-107	7.47736e-106	2.72513	1.77043	18.0104	6.90393e-52	4.26871e-51	107.148
RP11-817I4.1	24.8077	2.51342	0.105349	23.8581	8.34523e-126	1.39825e-124	2.46729	-0.523058	535.013	2.29321e-118	4.77308e-117	2.67797	-1.4589	24.6057	1.54032e-78	3.15055e-77	168.426
RNF183	80.9438	3.50688	0.147008	23.8551	8.96311e-126	1.50076e-124	3.4422	1.07104	477.033	9.44658e-106	1.42855e-104	2.91003	-0.496319	15.9348	1.92155e-43	8.79847e-43	87.9093
E2F1	185.899	2.62827	0.110294	23.8298	1.64128e-125	2.74073e-124	2.62041	2.23895	519.766	4.75746e-115	9.17177e-114	2.39992	1.28268	19.2952	3.85207e-57	2.93948e-56	119.246
AC009065.4	19.7868	5.23881	0.219929	23.8204	2.05223e-125	3.42006e-124	5.10016	-0.818115	638.712	6.36863e-141	2.45177e-139	5.28153	-2.92903	45.7059	3.0068e-150	3.7331e-146	332.087
TRBV25-1	204.664	3.67271	0.154243	23.8111	2.56148e-125	4.26015e-124	3.17359	2.42097	301.05	1.94563e-67	1.21723e-66	3.54786	0.67028	19.4524	8.77431e-58	6.88823e-57	120.768
GLT8D2	393.403	2.48514	0.104395	23.8051	2.95793e-125	4.91294e-124	2.4944	3.33108	495.12	1.09595e-109	1.82519e-108	2.25017	2.49783	19.8372	2.35258e-59	1.97288e-58	124.244
IL2RB	202.022	2.85023	0.119783	23.7951	3.75642e-125	6.21838e-124	2.47104	2.4347	285.406	4.98314e-64	2.89104e-63	2.66468	1.28638	18.9991	6.25547e-56	4.54313e-55	116.469
SELL	377.259	3.81115	0.160166	23.795	3.76284e-125	6.22486e-124	2.67879	3.35769	167.426	2.70013e-38	8.76545e-38	3.28195	1.40319	16.503	9.60907e-46	4.74643e-45	93.0788
PRDM1	435.283	2.45419	0.103189	23.7833	4.97074e-125	8.21214e-124	2.47485	3.478	502.488	2.73273e-111	4.74853e-110	2.38198	2.65056	22.8766	1.14986e-71	1.64852e-70	152.547
RRM2	431.599	3.49657	0.147153	23.7614	8.37451e-125	1.37805e-123	3.5078	3.45861	476.302	1.36247e-105	2.05163e-104	3.92318	1.8145	23.0872	1.65003e-72	2.46968e-71	154.557
SSC5D	670.46	2.70386	0.113871	23.745	1.23661e-124	2.03218e-123	2.71826	4.09909	490.951	8.84882e-109	1.4333e-107	2.4584	3.11809	19.9633	7.19178e-60	6.17707e-59	125.391
TMEM200C	47.6669	3.22937	0.136015	23.7428	1.30314e-124	2.14009e-123	3.18527	0.357119	495.627	8.50137e-110	1.42345e-108	3.51697	-1.06339	25.9604	7.77596e-84	2.1622e-82	180.579
GDPD2	33.9673	5.01648	0.211366	23.7336	1.62279e-124	2.66152e-123	2.50819	0.053144	81.0637	2.18554e-19	4.53717e-19	3.85519	-2.51037	16.8318	4.43096e-47	2.29649e-46	96.3167
FSTL1	8707.4	2.36087	0.0995629	23.7124	2.68619e-124	4.394e-123	2.38772	7.79439	491.369	7.17603e-109	1.16387e-107	2.23186	7.0164	20.9522	6.75549e-64	6.88894e-63	134.554
C15orf48	1053.32	3.53312	0.149047	23.7047	3.22309e-124	5.2653e-123	3.5329	4.73325	463.116	1.00887e-102	1.42498e-101	3.6058	3.07275	21.2952	2.73821e-65	2.94595e-64	137.896
OIP5	32.8772	2.86041	0.120712	23.6961	3.95463e-124	6.44763e-123	2.767	-0.150023	509.171	9.60894e-113	1.73527e-111	2.60724	-1.22473	19.0682	3.26543e-56	2.40106e-55	117.224
RAD54L	69.7849	3.21661	0.135778	23.6901	4.55788e-124	7.42143e-123	3.16212	0.870714	485.851	1.13915e-107	1.80397e-106	3.25905	-0.526306	21.0033	4.1908e-64	4.29829e-63	135.315
HHIPL1	129.56	2.51256	0.106142	23.6716	7.06811e-124	1.14636e-122	2.50316	1.74887	498.147	2.40476e-110	4.07594e-109	2.37814	0.848517	20.7421	4.83148e-63	4.75131e-62	132.829
ERCC6L	39.7419	2.53275	0.107039	23.662	8.88296e-124	1.43883e-122	2.48057	0.106252	507.925	1.79331e-112	3.21282e-111	2.26687	-0.794542	18.3677	2.38851e-53	1.55544e-52	110.642
CDH2	296.386	3.51549	0.148688	23.6434	1.37921e-123	2.22964e-122	3.52343	2.93766	465.259	3.44633e-103	4.93802e-102	3.06971	1.26903	16.1971	1.66992e-44	7.89822e-44	90.2375
SPINK4	141.718	7.29714	0.308702	23.6381	1.56369e-123	2.52458e-122	10.8588	6.14912	343.657	1.01975e-76	7.85892e-76	3.90321	-2.67508	11.2818	2.06209e-25	5.38195e-25	46.7317
NHS	308.941	2.33648	0.098859	23.6344	1.70726e-123	2.75279e-122	2.37035	2.98867	506.322	4.00424e-112	7.08186e-111	2.08785	2.20917	17.8109	4.50767e-51	2.69386e-50	105.225
MOGAT2	53.9335	5.57275	0.2365	23.5635	9.13873e-123	1.45557e-121	5.47687	0.508955	418.36	5.5517e-93	6.31201e-92	3.83441	-2.47556	15.3885	3.04615e-41	1.29741e-40	82.9439
ULBP2	59.3176	3.20714	0.136113	23.5623	9.39426e-123	1.49436e-121	3.12851	0.64146	481.689	9.16731e-107	1.42449e-105	2.62132	-0.696397	16.5431	6.60592e-46	3.28129e-45	93.5684
RP11-161H23.5	1058.74	2.47984	0.105247	23.5621	9.43345e-123	1.49963e-121	2.47802	4.7144	529.076	4.48704e-117	9.04365e-116	2.18085	3.87049	20.2069	7.29916e-61	6.53843e-60	127.612
ITGBL1	1568.39	3.25861	0.138322	23.5581	1.03662e-122	1.64686e-121	3.27871	5.33541	456.79	2.40095e-101	3.29563e-100	3.06096	3.89591	18.781	4.8781e-55	3.40247e-54	114.256
FOXS1	140.988	3.14567	0.133564	23.5518	1.2032e-122	1.90783e-121	3.11094	1.86572	466.475	1.87462e-103	2.70004e-102	3.29429	0.512968	22.6242	1.18317e-70	1.62138e-69	150.328
CH17-360D5.2	116.617	4.71707	0.200465	23.5307	1.97931e-122	3.12251e-121	4.65641	1.60487	415.113	2.82652e-92	3.15298e-91	5.04264	-1.00545	19.7726	4.3178e-59	3.581e-58	123.825
SP140	112.463	3.3484	0.142352	23.522	2.42847e-122	3.82866e-121	2.27699	1.6616	150.417	1.40569e-34	4.19678e-34	2.79313	0.0965228	17.6863	1.45556e-50	8.55457e-50	104.216
TENM4	317.299	2.74163	0.116622	23.5086	3.33025e-122	5.24373e-121	2.7509	3.02828	478.391	4.78434e-106	7.31831e-105	2.56239	1.98439	18.0481	4.83988e-52	3.01125e-51	107.483
SERPINB3	237.83	6.0341	0.257052	23.4743	7.46891e-122	1.1701e-120	5.38566	2.60902	285.96	3.77385e-64	2.19715e-63	3.44969	-1.34933	9.59777	1.56118e-19	3.41577e-19	33.2471
CATSPER1	36.4049	3.81036	0.162351	23.4699	8.27523e-122	1.2956e-120	3.73269	-0.0201959	468.164	8.04238e-104	1.16647e-102	3.78087	-1.78841	22.3728	1.21274e-69	1.58659e-68	148.027
CFH	2678.24	2.29024	0.0976777	23.4469	1.42057e-121	2.2171e-120	2.31975	6.09369	492.407	4.26697e-109	6.95687e-108	2.04693	5.33084	19.9684	6.85799e-60	5.89854e-59	125.302
FOXF2	137.511	2.25744	0.0963482	23.4301	2.11101e-121	3.28643e-120	2.26239	1.83388	493.725	2.20488e-109	3.633e-108	2.04012	1.09263	18.6573	1.56328e-54	1.06643e-53	113.263
TCN1	2840.69	4.89816	0.209266	23.4063	3.68559e-121	5.70555e-120	4.9089	6.18941	394.313	9.52815e-88	9.54006e-87	5.09934	3.07336	15.1783	2.12216e-40	8.77964e-40	80.7637
ROBO1	599.33	2.28913	0.0978066	23.4047	3.82899e-121	5.91279e-120	2.31549	3.94322	484.15	2.67133e-107	4.19556e-106	2.10124	3.21249	19.9836	5.94705e-60	5.13103e-59	125.561
FOXP3	67.6549	3.44545	0.147355	23.382	6.51448e-121	9.99759e-120	3.41548	0.836695	470.023	3.16762e-104	4.64865e-103	3.65531	-0.753246	25.7146	7.00823e-83	1.8318e-81	178.395
RP11-334E6.12	420.692	3.58616	0.153383	23.3804	6.76604e-121	1.03708e-119	3.58116	3.43446	449.504	9.2505e-100	1.22637e-98	4.0195	1.70319	20.9385	7.68232e-64	7.81802e-63	134.645
YWHAZP4	15.1217	3.19862	0.136836	23.3756	7.56246e-121	1.15773e-119	3.17548	-1.13065	537.813	5.63778e-119	1.18939e-117	3.43834	-2.48505	25.0257	3.44079e-80	7.76712e-79	172.181
CCL20	380.912	4.57383	0.19567	23.3752	7.63868e-121	1.16868e-119	4.54243	3.2732	410.633	2.66917e-91	2.91974e-90	4.32855	0.577426	14.7027	1.67847e-38	6.52954e-38	76.5283
ALPP	52.5983	7.61596	0.325943	23.3659	9.49536e-121	1.44917e-119	8.35657	1.25153	375.694	1.07765e-83	9.86698e-83	4.14536	-3.30715	13.5239	7.30455e-34	2.44975e-33	66.0656
FAM131B	60.1101	2.93859	0.125767	23.3653	9.62639e-121	1.46826e-119	2.90151	0.68289	476.818	1.05237e-105	1.5895e-104	2.58423	-0.511057	19.7657	4.60883e-59	3.81473e-58	123.745
C14orf37	128.842	2.31665	0.099174	23.3594	1.105e-120	1.68333e-119	2.32718	1.74727	484.083	2.76238e-107	4.33308e-106	2.06359	0.958188	18.779	4.96754e-55	3.46291e-54	114.416
DKK2	76.4679	3.85674	0.165139	23.3545	1.24024e-120	1.8882e-119	3.81733	1.02308	440.588	8.0636e-98	1.0247e-96	4.14837	-0.926856	23.395	9.7234e-74	1.54969e-72	157.424
ZNF469	428.991	3.16211	0.135497	23.3372	1.86004e-120	2.82487e-119	3.16738	3.45454	464.98	3.96407e-103	5.66026e-102	3.19568	2.08808	20.7097	6.53872e-63	6.38972e-62	132.471
PRRX2	156.118	3.38202	0.144965	23.3299	2.2069e-120	3.34756e-119	3.33799	1.98608	459.91	5.02774e-102	6.96673e-101	3.18159	0.447444	17.9495	1.22459e-51	7.48777e-51	106.668
RP11-38M8.1	16.6548	3.17651	0.136167	23.328	2.30576e-120	3.49538e-119	3.10186	-1.05225	536.657	1.00609e-118	2.11355e-117	3.02176	-2.30701	22.1681	8.09897e-69	1.01517e-67	146.132
IGHGP	559.332	6.72889	0.288525	23.3217	2.67137e-120	4.04468e-119	6.20707	3.82801	282.149	2.55443e-63	1.46217e-62	7.51016	-0.652598	19.818	2.818e-59	2.35443e-58	124.248
FOXQ1	294.346	2.94547	0.126314	23.3187	2.86785e-120	4.33424e-119	2.97008	2.91864	477.657	6.91008e-106	1.05009e-104	2.46191	1.71056	12.7473	7.16259e-31	2.19926e-30	58.9125
SERTAD4-AS1	45.2531	2.80159	0.120219	23.3041	4.02503e-120	6.07203e-119	2.75971	0.275318	486.042	1.03538e-107	1.64383e-106	2.85086	-0.838381	22.7819	2.75438e-71	3.87721e-70	151.799
SLC7A7	887.415	2.26642	0.0972558	23.3037	4.07078e-120	6.13732e-119	2.29041	4.49985	489.716	1.643e-108	2.64746e-107	2.05799	3.76722	20.6909	7.79803e-63	7.5994e-62	132.15
SFRP4	3225.83	3.97146	0.170423	23.3035	4.08128e-120	6.14942e-119	3.97318	6.36771	421.302	1.27045e-93	1.46456e-92	4.24058	4.26004	22.1831	7.04076e-69	8.86108e-68	146.118
SAMD14	89.93	2.30881	0.0991026	23.2972	4.73332e-120	7.11889e-119	2.29929	1.2286	486.76	7.22289e-108	1.14969e-106	2.34418	0.435807	25.1609	1.01567e-80	2.37254e-79	173.443
IGHG2	6202.78	5.21326	0.223784	23.2959	4.87335e-120	7.32064e-119	5.20477	7.29048	378.123	3.18833e-84	2.96293e-83	5.24794	3.77709	17.9752	9.61209e-52	5.90787e-51	106.785
HOXB-AS3	29.053	3.02846	0.130029	23.2907	5.50784e-120	8.26375e-119	3.31222	-0.0582748	447.714	2.26798e-99	2.98919e-98	2.95423	-1.54054	21.4052	9.81471e-66	1.07884e-64	139.067
CHSY3	95.6323	2.64938	0.113796	23.2817	6.78684e-120	1.01766e-118	2.64303	1.33225	479.263	3.09109e-106	4.76442e-105	2.5079	0.310849	19.1722	1.22561e-56	9.16291e-56	118.149
HNRNPA1P33	41.2801	4.71364	0.20249	23.2784	7.34461e-120	1.09996e-118	4.6524	0.169719	437.471	3.84561e-97	4.83251e-96	4.45667	-2.18818	20.5545	2.7995e-62	2.67055e-61	131.147
WNT7A	243.98	5.57119	0.239367	23.2747	8.00019e-120	1.19598e-118	5.55026	2.65403	374.631	1.83588e-83	1.66984e-82	5.73745	-0.882878	15.8558	4.00379e-43	1.81718e-42	87.2031
CXCR4	1975.63	3.23932	0.139312	23.2523	1.348e-119	2.00914e-118	2.88736	5.66874	308.46	4.72729e-69	3.07851e-68	3.04727	4.23462	21.5895	1.75879e-66	1.99055e-65	140.555
STRA6	512.344	4.57866	0.196989	23.2432	1.66541e-119	2.47331e-118	4.56047	3.71653	401.865	2.16291e-89	2.2623e-88	5.9398	0.958312	25.5954	2.03931e-82	5.19366e-81	177.341
IL21R	94.8169	3.50741	0.151052	23.2199	2.86542e-119	4.23771e-118	2.9423	1.35214	270.196	1.02841e-60	5.56227e-60	3.38518	-0.30453	20.1497	1.2494e-60	1.1076e-59	127.337
TTC9	560.888	2.40413	0.103542	23.219	2.92953e-119	4.32995e-118	2.42209	3.83847	481.868	8.38213e-107	1.3033e-105	2.06918	3.01817	18.5354	4.92744e-54	3.29793e-53	111.966
HIST1H3H	46.02	4.05723	0.17476	23.216	3.1365e-119	4.6331e-118	3.99439	0.30072	443.563	1.81583e-98	2.33863e-97	3.58102	-1.68499	17.847	3.20997e-51	1.92994e-50	105.787
CTB-191K22.5	298.898	4.20841	0.181367	23.2038	4.16368e-119	6.12854e-118	4.1049	2.84593	427.76	4.99316e-95	5.97518e-94	4.11187	0.626222	17.843	3.33461e-51	2.0044e-50	105.669
ADAMTS7	285.811	2.42403	0.104493	23.198	4.77189e-119	7.01129e-118	2.42732	2.8698	480.187	1.94522e-106	3.00459e-105	2.14392	2.0429	18.5372	4.84342e-54	3.24257e-53	112.063
PXDN	2035.37	2.44429	0.105387	23.1934	5.30662e-119	7.79235e-118	2.46911	5.69701	480.404	1.74491e-106	2.69955e-105	2.16736	4.83009	21.9896	4.24736e-68	5.16737e-67	144.208
TNFRSF11B	400.975	3.53087	0.152301	23.1834	6.68851e-119	9.79837e-118	3.52664	3.35396	442.316	3.39147e-98	4.35213e-97	2.84044	1.66691	14.1006	4.04886e-36	1.45896e-35	70.959
PAEP	33.3669	7.2663	0.313616	23.1694	9.2662e-119	1.35267e-117	9.11332	1.29977	407.862	1.07022e-90	1.15141e-89	4.08789	-3.52641	16.4537	1.52269e-45	7.47232e-45	92.8106
HSD17B6	61.8957	3.43045	0.148075	23.167	9.8046e-119	1.43042e-117	2.98106	0.75545	293.078	1.06159e-65	6.39505e-65	3.47102	-0.861381	21.2405	4.56288e-65	4.85645e-64	137.531
NPTX1	228.994	3.77077	0.162928	23.1438	1.67734e-118	2.43852e-117	3.77603	2.57709	434.819	1.45234e-96	1.80046e-95	3.7766	0.643207	17.392	2.31243e-49	1.30175e-48	101.438
BEAN1	163.052	3.0179	0.130398	23.1438	1.67993e-118	2.44086e-117	3.02575	2.0807	464.445	5.18234e-103	7.36593e-102	2.22583	0.825133	12.7455	7.2743e-31	2.23301e-30	58.9785
PDLIM4	725.867	2.75397	0.119036	23.1356	2.03181e-118	2.94696e-117	2.75238	4.19342	474.55	3.27865e-105	4.90435e-104	2.54533	3.15837	19.9095	1.1923e-59	1.01114e-58	124.886
IGKV3-15	564.602	5.51998	0.238654	23.1297	2.32965e-118	3.37303e-117	5.0862	3.86163	301.025	1.97021e-67	1.2323e-66	5.31258	0.208958	14.8139	6.05752e-39	2.39018e-38	77.5713
TMEM171	97.4082	3.3579	0.145188	23.1279	2.42819e-118	3.51366e-117	3.31013	1.33322	454.922	6.12313e-101	8.34486e-100	3.24286	-0.20403	17.1446	2.35919e-48	1.27822e-47	99.1611
CCL17	64.3406	5.75918	0.249132	23.1169	3.12791e-118	4.51828e-117	4.7182	0.793195	233.952	8.19509e-53	3.70121e-52	5.0705	-2.3193	19.9256	1.02544e-59	8.73206e-59	125.27
MRC2	3279.72	2.56881	0.111165	23.1081	3.84165e-118	5.54605e-117	2.58306	6.37909	471.503	1.50887e-104	2.22751e-103	2.3568	5.42275	21.5799	1.92415e-66	2.17471e-65	140.388
COL4A2	14866.1	2.21011	0.0957199	23.0893	5.93031e-118	8.54646e-117	2.23948	8.56625	463.595	7.93343e-103	1.12312e-101	2.31652	7.93022	22.1695	7.98786e-69	1.00226e-67	145.934
ARSI	117.208	3.39661	0.147335	23.0537	1.35188e-117	1.93814e-116	3.35395	1.59094	448.427	1.58633e-99	2.093e-98	3.33075	0.0150579	18.9102	1.4449e-55	1.03247e-54	115.705
CD3D	112.911	3.44746	0.149592	23.0457	1.62358e-117	2.32498e-116	2.97547	1.57758	287.868	1.44926e-64	8.5175e-64	3.20183	-0.0398665	19.1215	1.97542e-56	1.46379e-55	117.69
LINC00941	63.1789	3.56591	0.154735	23.0452	1.64313e-117	2.35162e-116	3.53575	0.755268	440.619	7.93953e-98	1.00945e-96	3.00823	-0.934921	14.9851	1.25699e-39	5.06939e-39	79.183
IL11	78.9667	3.94949	0.171425	23.0392	1.8855e-117	2.69384e-116	3.97515	1.376	357.354	1.06125e-79	8.78686e-79	3.25742	-0.918144	16.7365	1.08191e-46	5.51412e-46	95.3804
ORC6	75.4825	2.32021	0.100768	23.0252	2.60869e-117	3.71637e-116	2.31332	0.977795	488.806	2.59192e-108	4.15225e-107	2.11378	0.178225	19.1644	1.32006e-56	9.85519e-56	118.079
GABRD	43.1657	3.18508	0.138356	23.0209	2.87715e-117	4.09647e-116	3.14466	0.214181	462.652	1.27263e-102	1.78939e-101	3.6683	-1.23119	26.5709	3.39952e-86	1.08625e-84	185.982
FOSL1	445.602	3.5869	0.15589	23.0092	3.77377e-117	5.36386e-116	3.59449	3.49881	443.593	1.78828e-98	2.30435e-97	3.54781	1.73377	17.3398	3.77792e-49	2.1114e-48	100.882
PLXDC2	2249.15	2.57531	0.111951	23.004	4.24925e-117	6.03622e-116	2.60248	5.8516	460.688	3.40474e-102	4.73896e-101	2.39008	4.89089	21.8723	1.2648e-67	1.50126e-66	143.125
FGF1	144.003	3.10729	0.135083	23.0029	4.36221e-117	6.19314e-116	3.09328	1.90381	450.442	5.77862e-100	7.68554e-99	2.88388	0.543712	20.7326	5.27959e-63	5.18172e-62	132.758
PIGR	9288.34	3.82672	0.166364	23.0021	4.4428e-117	6.30396e-116	3.8596	7.8981	419.911	2.55156e-93	2.92241e-92	2.93677	5.95132	12.7896	4.93766e-31	1.52326e-30	59.0182
PTAFR	602.722	2.60137	0.113137	22.9931	5.46241e-117	7.72421e-116	2.61095	3.94296	464.155	5.9948e-103	8.51584e-102	2.59102	2.98959	22.0609	2.19065e-68	2.69822e-67	144.99
HOXC6	73.4374	2.94096	0.127918	22.9909	5.7511e-117	8.12781e-116	2.88709	0.944322	460.056	4.67302e-102	6.48245e-101	2.64538	-0.25776	16.9516	1.44197e-47	7.61013e-47	97.3582
FDCSP	254.545	6.69608	0.29144	22.9758	8.13158e-117	1.14725e-115	5.46344	3.24057	184.008	6.46192e-42	2.27856e-41	5.19354	-1.69586	14.3722	3.43221e-37	1.28177e-36	73.6361
IGKV3-20	1248.69	5.07356	0.220887	22.969	9.51388e-117	1.33998e-115	5.06713	4.98333	376.101	8.78529e-84	8.06162e-83	5.11049	1.63177	14.4523	1.65466e-37	6.25846e-37	74.2091
RP11-64K7.1	4.92876	4.02691	0.175469	22.9495	1.4922e-116	2.09457e-115	3.99219	-2.45031	744.881	5.20542e-164	3.85838e-162	3.47443	-3.77922	33.4353	2.16194e-111	4.51118e-109	243.447
MXRA8	3270.8	2.45356	0.106999	22.9306	2.29927e-116	3.22014e-115	2.46137	6.36862	468.69	6.17912e-104	8.99378e-103	2.18663	5.4864	21.2422	4.49283e-65	4.7901e-64	137.232
ALPPL2	52.8325	8.07111	0.352109	22.9222	2.79294e-116	3.90713e-115	9.07654	1.10823	386.598	4.55414e-86	4.40015e-85	3.88664	-3.62005	13.8807	2.95564e-35	1.03368e-34	69.2612
IGLV3-21	267.445	5.56394	0.242806	22.9152	3.2762e-116	4.58059e-115	6.13675	3.3704	369.077	2.97227e-82	2.62556e-81	5.22589	-0.788215	15.2056	1.64913e-40	6.84774e-40	81.2032
COL4A1	12943.5	2.26907	0.0990957	22.8977	4.89574e-116	6.83339e-115	2.30456	8.37108	457.534	1.65385e-101	2.27139e-100	2.29971	7.66767	21.0554	2.57444e-64	2.6658e-63	135.549
UGT1A1	81.1539	6.3588	0.277747	22.8942	5.30829e-116	7.40507e-115	6.22198	1.12392	366.411	1.13127e-81	9.79789e-81	5.12101	-2.36045	18.14	2.03855e-52	1.28606e-51	108.541
CYP24A1	63.625	7.2795	0.318047	22.8881	6.10242e-116	8.50332e-115	7.13869	0.76881	371.409	9.23402e-83	8.25378e-82	4.33154	-3.13753	16.3023	6.26179e-45	3.00806e-44	91.3982
XXYLT1-AS2	14.1013	5.41783	0.236907	22.869	9.45902e-116	1.31363e-114	5.3045	-1.26222	504.229	1.14232e-111	2.00035e-110	3.82407	-3.40782	20.9812	5.15324e-64	5.27453e-63	135.119
HES2	60.1929	4.69307	0.205272	22.8626	1.09394e-115	1.51752e-114	4.63143	0.662577	409.5	4.70901e-91	5.11502e-90	4.1216	-1.88776	19.6313	1.63169e-58	1.31718e-57	122.513
FLJ16779	46.0011	4.82836	0.211199	22.8616	1.11932e-115	1.55186e-114	3.87227	0.331965	232.591	1.62274e-52	7.27598e-52	4.16017	-2.20898	18.6	2.68256e-54	1.815e-53	112.853
RP11-54H7.4	142.136	6.18078	0.270422	22.8561	1.2722e-115	1.76087e-114	6.14983	1.89268	350.795	2.8447e-78	2.27641e-77	3.23831	-2.1484	9.31929	1.30566e-18	2.78219e-18	31.1957
RP11-284F21.10	198.244	3.81289	0.166943	22.8394	1.86265e-115	2.56953e-114	3.78716	2.33145	426.543	9.19e-95	1.08925e-93	3.7761	0.346636	16.8276	4.60945e-47	2.38801e-46	96.1754
HSF2BP	20.7176	2.28231	0.100066	22.808	3.81692e-115	5.24504e-114	2.23051	-0.767932	502.708	2.4476e-111	4.25903e-110	2.17325	-1.54989	20.4293	9.06194e-62	8.4561e-61	129.974
BST1	166.943	2.56581	0.112507	22.8058	4.01965e-115	5.52057e-114	2.59103	2.1112	483.539	3.62765e-107	5.66886e-106	2.69992	1.12523	20.7641	3.92902e-63	3.8761e-62	133.025
POU2AF1	237.258	4.05791	0.178071	22.7881	6.01221e-115	8.23891e-114	2.70337	2.70212	140.399	2.17785e-32	6.17613e-32	3.49711	0.427079	14.3114	5.96908e-37	2.20694e-36	72.9723
KLHDC7B	212.825	4.66196	0.204592	22.7866	6.22163e-115	8.52119e-114	4.63796	2.47151	386.261	5.39362e-86	5.19709e-85	3.67044	-0.371843	15.4295	2.08436e-41	8.92359e-41	83.2378
RIPPLY3	15.3197	3.92841	0.172403	22.7861	6.2914e-115	8.612e-114	3.85005	-1.14603	509.721	7.29192e-113	1.32261e-111	3.50476	-2.79403	23.035	2.66717e-72	3.94923e-71	154.104
IGKC	27641.2	4.67496	0.205317	22.7695	9.2008e-115	1.25738e-113	4.68134	9.45038	378.715	2.36953e-84	2.21029e-83	5.06866	6.67466	19.3804	1.72846e-57	1.34082e-56	119.883
ADAMTS2	2148.05	2.38484	0.104801	22.7558	1.25733e-114	1.71448e-113	2.41085	5.7765	462.864	1.14441e-102	1.61276e-101	2.18372	4.92981	21.0788	2.06886e-64	2.14675e-63	135.72
NPR3	486.502	3.23167	0.142081	22.7453	1.59721e-114	2.17436e-113	3.25838	3.64905	437.088	4.6583e-97	5.83898e-96	2.78522	2.17972	15.7329	1.25351e-42	5.59214e-42	85.8523
EVPL	1463.99	2.70669	0.119004	22.7445	1.62809e-114	2.21397e-113	2.73516	5.21384	465.179	3.58803e-103	5.13809e-102	2.00396	4.15977	12.4636	8.55626e-30	2.54413e-29	56.198
NKAIN4	40.3309	5.20156	0.228765	22.7376	1.90573e-114	2.59011e-113	4.48011	0.106498	289.174	7.52478e-65	4.44664e-64	4.36895	-2.53695	21.3986	1.04379e-65	1.14582e-64	139.005
KIF18B	112.67	3.44898	0.151728	22.7314	2.19186e-114	2.9741e-113	3.42179	1.54427	432.983	3.64484e-96	4.47601e-95	3.98449	-0.149202	22.5665	2.01738e-70	2.73885e-69	149.809
C6orf223	247.19	3.24306	0.142729	22.7217	2.73209e-114	3.70309e-113	3.24645	2.66044	440.677	7.71046e-98	9.80832e-97	2.43499	1.18991	11.3469	1.19591e-25	3.14538e-25	47.0056
IGLC1	2851.8	4.76406	0.209826	22.7048	4.0181e-114	5.43133e-113	4.75937	6.17196	377.445	4.4802e-84	4.14176e-83	4.70718	3.1361	16.1722	2.1066e-44	9.92202e-44	89.9354
CLSPN	45.5897	2.85323	0.125722	22.6947	5.05124e-114	6.813e-113	2.83217	0.308254	453.85	1.04768e-100	1.41771e-99	2.99476	-0.917471	20.8492	1.77157e-63	1.77235e-62	133.885
RPL37P6	12.2723	4.52709	0.19953	22.6888	5.779e-114	7.79035e-113	5.15416	-0.889345	450.494	5.63001e-100	7.49189e-99	4.19051	-3.16136	31.6626	3.97426e-105	4.98408e-103	229.209
DDIAS	45.73	2.31177	0.101908	22.6849	6.30858e-114	8.49503e-113	2.27904	0.299406	471.259	1.70571e-104	2.51362e-103	2.18974	-0.532689	18.7843	4.7297e-55	3.30175e-54	114.541
WTAPP1	19.4611	5.52348	0.243597	22.6747	7.96491e-114	1.07138e-112	5.40613	-0.832682	478.508	4.51158e-106	6.91525e-105	4.279	-3.16562	20.9384	7.68856e-64	7.82116e-63	134.724
RP11-554I8.2	19.6115	5.79074	0.255413	22.6721	8.45058e-114	1.13609e-112	5.75801	-0.804414	477.177	8.78995e-106	1.33169e-104	4.17714	-3.28697	20.4188	9.99467e-62	9.29504e-61	129.88
SIX1	47.0677	4.23515	0.186851	22.666	9.70515e-114	1.30405e-112	4.18334	0.342393	417.198	9.93856e-93	1.12073e-91	3.67377	-1.8323	17.1357	2.56648e-48	1.38811e-47	99.1364
CALB2	235.815	4.13668	0.18262	22.6519	1.33617e-113	1.79246e-112	4.11957	2.59852	402.857	1.31511e-89	1.37904e-88	3.79562	0.271345	15.2417	1.18174e-40	4.93171e-40	81.4764
SPOCK2	1158.1	3.14245	0.138754	22.6476	1.47256e-113	1.97011e-112	3.15567	4.87263	438.099	2.80655e-97	3.53216e-96	2.46653	3.50845	17.4364	1.52474e-49	8.64403e-49	101.623
DIO2	442.445	3.04785	0.134582	22.6468	1.49971e-113	2.00535e-112	3.06323	3.50096	444.399	1.19443e-98	1.54553e-97	3.07698	2.18601	19.0464	4.00894e-56	2.933e-55	116.862
VGLL1	105.401	4.12519	0.182168	22.6449	1.56509e-113	2.09052e-112	4.07176	1.46837	401.662	2.39402e-89	2.50088e-88	3.14163	-0.74036	12.7041	1.04607e-30	3.1918e-30	58.7393
AC016735.2	141.567	5.16317	0.228033	22.6423	1.66273e-113	2.21975e-112	4.46398	1.90727	262.313	5.37337e-59	2.79134e-58	3.14844	-1.3058	9.72659	5.77568e-20	1.27867e-19	34.2283
SOX21-AS1	41.9858	5.73812	0.253539	22.6321	2.09259e-113	2.78612e-112	5.66598	0.18523	401.408	2.71972e-89	2.83753e-88	4.56962	-2.75254	17.4046	2.05448e-49	1.15995e-48	101.665
SNRPGP2	10.11	2.20239	0.0973307	22.6279	2.30087e-113	3.0587e-112	2.15469	-1.6606	584.162	4.66495e-129	1.27013e-127	2.38407	-2.46157	23.5535	2.27099e-74	3.73203e-73	158.851
AP000695.4	15.0067	4.09321	0.18104	22.6094	3.49892e-113	4.64359e-112	3.99922	-1.18072	509.779	7.08412e-113	1.28586e-111	3.84323	-2.90375	24.478	4.9108e-78	9.76301e-77	167.238
MTFR2	36.9723	2.27306	0.100584	22.5985	4.47912e-113	5.93496e-112	2.21602	-0.00413276	472.773	7.98785e-105	1.18486e-103	2.10706	-0.789187	19.0524	3.78918e-56	2.77731e-55	117.065
RP4-583P15.14	95.2687	4.35936	0.192957	22.5924	5.14756e-113	6.81702e-112	4.2047	1.24665	422.652	6.45864e-94	7.49764e-93	4.64492	-0.996346	23.7223	4.83568e-75	8.24689e-74	160.413
TNFAIP6	155.597	4.00008	0.177092	22.5876	5.74059e-113	7.59024e-112	3.98059	2.01241	409.819	4.01328e-91	4.36887e-90	4.69024	-0.170132	23.2186	4.92002e-73	7.56933e-72	155.807
POU2F3	152.014	3.32504	0.147233	22.5836	6.28827e-113	8.30995e-112	3.3201	1.98226	431.597	7.30045e-96	8.89487e-95	2.59273	0.440595	12.1693	1.0969e-28	3.16012e-28	54.0288
CLCN1	25.9415	4.9259	0.218167	22.5785	7.04437e-113	9.30419e-112	4.84903	-0.454108	436.383	6.63238e-97	8.27997e-96	3.81658	-2.79598	19.2051	8.99646e-57	6.75305e-56	118.529
LYPD5	60.2594	2.58942	0.114709	22.5737	7.85986e-113	1.03647e-111	2.56647	0.680092	455.983	3.59717e-101	4.924e-100	2.66633	-0.353189	21.2622	3.72631e-65	3.98484e-64	137.723
FAP	1091.81	2.98729	0.132336	22.5735	7.89341e-113	1.03979e-111	2.99463	4.8014	431.619	7.21789e-96	8.7986e-95	2.89015	3.54716	19.0299	4.68303e-56	3.41711e-55	116.61
HOXB8	38.2254	4.60795	0.204293	22.5556	1.1845e-112	1.55621e-111	4.54729	0.0457459	417.875	7.07884e-93	8.01892e-92	3.52404	-2.31939	17.2449	9.20851e-49	5.0655e-48	100.168
GAPLINC	12.9881	4.3747	0.19402	22.5477	1.41429e-112	1.8532e-111	3.75383	-1.345	370.156	1.73043e-82	1.53348e-81	3.90186	-3.10457	28.8642	6.84415e-95	3.96147e-93	205.807
NPFFR1	25.5373	4.20438	0.186568	22.5354	1.86718e-112	2.44407e-111	4.14033	-0.482854	447.602	2.39854e-99	3.15958e-98	4.14815	-2.46008	23.4117	8.34402e-74	1.33499e-72	157.559
PPP2R2C	238.785	3.5741	0.158609	22.5341	1.92444e-112	2.51504e-111	3.57861	2.6305	418.438	5.33909e-93	6.07306e-92	2.56033	0.843836	11.8664	1.47693e-27	4.10632e-27	51.4073
FGF19	258.884	6.8801	0.305423	22.5264	2.28586e-112	2.98423e-111	6.43081	2.72055	276.554	4.23198e-62	2.36479e-61	6.08147	-1.74983	17.5316	6.23106e-50	3.58073e-49	102.833
YWHAZP5	17.9441	3.22915	0.143354	22.5257	2.32307e-112	3.03122e-111	3.22425	-0.924898	483.842	3.11728e-107	4.88053e-106	3.46417	-2.32028	23.8219	1.94373e-75	3.37988e-74	161.301
VMO1	60.0922	2.55222	0.113304	22.5254	2.33851e-112	3.04976e-111	2.10939	0.707174	242.47	1.13788e-54	5.3371e-54	2.29765	-0.285097	19.0168	5.29739e-56	3.85973e-55	116.714
IL2RA	142.804	4.0562	0.180101	22.5217	2.54262e-112	3.31247e-111	4.03937	1.89597	404.555	5.61457e-90	5.93257e-89	4.55926	-0.331588	21.2673	3.55405e-65	3.80227e-64	137.773
HLA-F	2242.18	2.30735	0.102451	22.5214	2.56079e-112	3.3344e-111	2.32019	5.8226	463.628	7.80335e-103	1.10596e-101	2.14599	5.03415	22.9812	4.38123e-72	6.39943e-71	153.375
ZG16B	592.707	4.26523	0.189389	22.5209	2.5885e-112	3.36872e-111	4.25201	3.89063	400.163	5.07568e-89	5.25362e-88	4.45145	1.41414	16.6423	2.6123e-46	1.31521e-45	94.401
RFTN1	918.319	2.16641	0.0963227	22.4912	5.06153e-112	6.5665e-111	2.18685	4.54454	461.991	1.77233e-102	2.47937e-101	2.072	3.86531	22.794	2.46471e-71	3.48129e-70	151.701
HPDL	46.6696	3.13571	0.139487	22.4803	6.47246e-112	8.38818e-111	3.06158	0.305867	444.376	1.20788e-98	1.56213e-97	2.47992	-1.01342	15.4032	2.66014e-41	1.13534e-40	83.0242
ADAMTS14	264.599	3.65263	0.162541	22.472	7.79589e-112	1.00928e-110	3.61247	2.73693	413.075	7.84755e-92	8.67212e-91	4.0991	0.877055	21.1435	1.13008e-64	1.18501e-63	136.589
GRAP	167.524	2.42801	0.108111	22.4585	1.05809e-111	1.36698e-110	2.00698	2.15334	228.828	1.07376e-51	4.72571e-51	2.05734	1.26262	18.3771	2.18639e-53	1.42831e-52	110.619
IRX5	42.0474	3.62566	0.161722	22.4191	2.56054e-111	3.29434e-110	3.57088	0.166732	428.636	3.21883e-95	3.86681e-94	3.37614	-1.54228	17.3128	4.8673e-49	2.70743e-48	100.783
NOX1	42.2766	6.28176	0.280264	22.4138	2.8899e-111	3.71424e-110	6.06336	0.120022	380.13	1.16602e-84	1.09217e-83	3.37238	-3.21621	14.1812	1.94891e-36	7.09477e-36	71.9599
RAB7B	253.375	2.57334	0.114828	22.4104	3.11312e-111	3.997e-110	2.57329	2.70072	440.885	6.94608e-98	8.8405e-97	2.51333	1.73708	20.1512	1.23193e-60	1.09279e-59	127.249
SH3TC2	64.1738	2.63621	0.11768	22.4015	3.80694e-111	4.88276e-110	2.61134	0.76969	445.56	6.67512e-99	8.68711e-98	2.21882	-0.251704	16.075	5.21138e-44	2.42466e-43	89.1948
AL158801.1	11.4427	3.26553	0.145789	22.3991	4.01595e-111	5.14817e-110	3.15918	-1.47896	523.784	6.35707e-116	1.24982e-114	3.18854	-2.73458	23.4803	4.44516e-74	7.20952e-73	158.177
GINS4	60.7005	2.17654	0.0972501	22.3809	6.0465e-111	7.72328e-110	2.15349	0.694799	453.923	1.01013e-100	1.36764e-99	2.10156	-0.0639607	19.7564	5.03136e-59	4.15753e-58	123.643
SLCO4A1-AS1	86.8907	3.81713	0.170555	22.3807	6.07187e-111	7.7517e-110	3.74355	1.14634	408.746	6.87233e-91	7.42588e-90	2.72885	-0.740724	12.8272	3.54732e-31	1.09857e-30	59.8137
CDKN2B	561.091	2.82323	0.126153	22.3795	6.23631e-111	7.95754e-110	2.84484	3.85278	433.623	2.64451e-96	3.26371e-95	2.60985	2.69722	18.0355	5.45102e-52	3.3839e-51	107.312
GIMAP2	217.891	2.30651	0.103097	22.3723	7.31812e-111	9.32835e-110	2.31739	2.48912	451.268	3.82125e-100	5.10411e-99	2.27332	1.68851	21.109	1.55934e-64	1.62211e-63	136.206
HMCN1	555.214	2.86052	0.127948	22.3568	1.03593e-110	1.31846e-109	2.90766	3.84675	439.56	1.34947e-97	1.70788e-96	2.58015	2.64962	15.8517	4.15917e-43	1.88495e-42	86.908
MMP3	71.8084	4.11915	0.184252	22.3561	1.05438e-110	1.34126e-109	5.02175	1.81366	395.563	5.09202e-88	5.13774e-87	3.44363	-1.23119	14.7035	1.66523e-38	6.48007e-38	76.6259
IGKV3-11	2630.23	4.7094	0.210779	22.3428	1.4185e-110	1.79984e-109	4.71159	6.05901	367.929	5.28556e-82	4.62785e-81	4.88112	3.03089	16.3287	4.89373e-45	2.36275e-44	91.4044
MT-TA	14.1728	4.48207	0.200714	22.3306	1.8645e-110	2.36091e-109	4.34382	-1.27306	515.16	4.78063e-114	8.95908e-113	3.98935	-3.08022	27.8848	3.2823e-91	1.4765e-89	197.391
F2RL2	331.479	3.12339	0.139927	22.3215	2.28511e-110	2.89055e-109	3.13738	3.10254	425.305	1.7088e-94	2.0081e-93	3.00973	1.70463	15.8698	3.51587e-43	1.59895e-42	87.1647
HOXC9	30.9268	4.14546	0.185887	22.3009	3.61874e-110	4.56823e-109	4.02698	-0.273665	426.181	1.10164e-94	1.30199e-93	3.60833	-2.23923	18.0183	6.41003e-52	3.96828e-51	107.402
AP000695.6	13.3041	4.25154	0.190693	22.2952	4.11161e-110	5.18777e-109	4.1623	-1.30931	519.015	6.93199e-115	1.32918e-113	4.08511	-3.07329	27.5686	5.19216e-90	2.15596e-88	194.648
LANCL3	31.0317	2.59063	0.116267	22.2818	5.54802e-110	6.99076e-109	2.54557	-0.219977	449.476	9.38059e-100	1.24295e-98	2.37451	-1.20887	18.7637	5.74221e-55	3.99062e-54	114.368
FLNC	1066	3.30447	0.148303	22.2818	5.54903e-110	6.99076e-109	3.33616	4.76918	418.995	4.03826e-93	4.60184e-92	2.4004	3.21843	15.1547	2.63742e-40	1.08751e-39	80.4167
CCNJL	80.0279	2.99954	0.134725	22.2641	8.2273e-110	1.03282e-108	2.95382	1.06231	436.517	6.20228e-97	7.74692e-96	2.68451	-0.231185	19.1945	9.94033e-57	7.45254e-56	118.381
CAMK4	146.138	2.74296	0.123239	22.2572	9.6089e-110	1.20565e-108	2.73067	1.92099	437.375	4.03458e-97	5.06229e-96	2.72152	0.814575	20.6772	8.86592e-63	8.6198e-62	132.228
DGKI	38.1289	2.91015	0.130782	22.252	1.07939e-109	1.35229e-108	2.8759	0.0538852	441.852	4.2803e-98	5.48138e-97	2.9703	-1.19751	22.3788	1.14716e-69	1.50476e-68	148.084
FAM177B	101.7	4.67613	0.210326	22.2328	1.65433e-109	2.06737e-108	4.63257	1.3914	377.7	3.9413e-84	3.65037e-83	4.18682	-1.3596	17.5963	3.39225e-50	1.9676e-49	103.431
POSTN	7316.27	4.50094	0.202525	22.2242	2.00614e-109	2.50199e-108	4.49769	7.54738	364.141	3.53045e-81	3.01564e-80	5.87873	4.72294	30.3416	2.39209e-100	2.11381e-98	218.516
ATG9B	147.268	3.17627	0.142958	22.2182	2.29128e-109	2.8533e-108	3.15045	1.90713	423.544	4.13174e-94	4.83029e-93	2.23398	0.499488	13.8136	5.41344e-35	1.87844e-34	68.4683
TBXAS1	597.306	2.67048	0.120199	22.2171	2.3489e-109	2.92358e-108	2.65416	3.90687	438.356	2.46795e-97	3.11233e-96	2.59024	2.88917	21.9151	8.49144e-68	1.0186e-66	143.643
LCN2	14020	4.28071	0.19275	22.2086	2.83635e-109	3.525e-108	4.27237	8.45922	372.298	5.91295e-83	5.30819e-82	4.52991	5.99388	17.1355	2.57072e-48	1.39011e-47	98.7799
CST2	200.748	5.13113	0.231092	22.2039	3.14971e-109	3.90857e-108	4.25534	2.40274	217.5	3.17404e-49	1.31974e-48	6.2527	-0.827023	21.4575	6.02147e-66	6.67794e-65	139.55
C3orf80	69.5607	2.98726	0.1347	22.1772	5.70394e-109	7.05352e-108	2.94831	0.882763	431.107	9.33311e-96	1.13548e-94	3.15494	-0.438332	23.1198	1.22154e-72	1.83942e-71	154.902
MOXD1	797.825	2.975	0.134355	22.1428	1.22337e-108	1.50533e-107	2.98842	4.35906	414.291	4.26697e-92	4.74064e-91	2.95384	3.08867	19.4126	1.27605e-57	9.94838e-57	120.241
OXTR	97.8938	3.21907	0.145404	22.1387	1.34045e-108	1.64857e-107	3.1964	1.35856	416.851	1.18272e-92	1.33129e-91	2.96935	-0.144257	18.9741	7.91635e-56	5.7176e-55	116.31
RP11-416I2.1	15.1061	3.64868	0.164825	22.1367	1.40052e-108	1.7216e-107	3.60028	-1.16543	477.031	9.45981e-106	1.42968e-104	3.20466	-2.69935	19.4519	8.81699e-58	6.91737e-57	120.84
MTMR11	1486.45	2.58759	0.116893	22.1364	1.4092e-108	1.73141e-107	2.60574	5.2356	440.232	9.63564e-98	1.22385e-96	2.29552	4.24993	20.1438	1.31986e-60	1.16714e-59	127.003
FAM69C	28.0924	4.00992	0.181326	22.1145	2.29461e-108	2.80954e-107	3.93992	-0.361865	424.174	3.01242e-94	3.52837e-93	4.04123	-2.28923	22.849	1.48301e-71	2.11393e-70	152.406
IQCJ-SCHIP1	158.999	2.45824	0.111172	22.112	2.42114e-108	2.963e-107	2.44834	2.03687	441.431	5.285e-98	6.7506e-97	2.53212	1.11746	21.7584	3.64818e-67	4.24498e-66	142.287
IGHV4-31	56.9598	6.48808	0.293438	22.1106	2.5014e-108	3.0582e-107	5.5031	0.631717	244.203	4.76697e-55	2.26196e-54	4.42306	-2.88962	16.2995	6.42528e-45	3.08361e-44	91.3688
FUT3	1385.86	2.82206	0.127653	22.1074	2.68571e-108	3.28194e-107	2.8296	5.12601	430.244	1.43828e-95	1.7413e-94	2.13149	3.96574	11.0191	1.8298e-24	4.64912e-24	44.0114
RP3-395M20.9	20.6388	3.81809	0.172754	22.1013	3.07298e-108	3.75148e-107	3.74676	-0.775309	444.828	9.63255e-99	1.25097e-97	3.46561	-2.48346	20.2899	3.35073e-61	3.0399e-60	128.677
ACTA2	10764.7	2.72458	0.123306	22.096	3.45019e-108	4.20166e-107	2.73941	8.09286	419.35	3.38006e-93	3.86064e-92	2.80478	7.03025	21.6212	1.3092e-66	1.48986e-65	140.805
ESPL1	125.471	2.67977	0.121283	22.0952	3.51767e-108	4.27963e-107	2.67329	1.69955	436.02	7.95512e-97	9.90144e-96	2.78024	0.592876	19.3938	1.52318e-57	1.18527e-56	120.216
SRPX2	541.814	2.44585	0.110701	22.0942	3.59673e-108	4.37367e-107	2.4636	3.7901	436.541	6.12651e-97	7.65999e-96	2.16597	2.90971	15.8943	2.79823e-43	1.27679e-42	87.2649
QPCT	1023.66	3.18224	0.14405	22.0911	3.84597e-108	4.66989e-107	3.18694	4.69897	410.36	3.06036e-91	3.34471e-90	2.33988	3.26613	15.4543	1.65743e-41	7.12158e-41	83.1702
SLC9A3	195.447	4.42572	0.200444	22.0795	4.97152e-108	6.02478e-107	4.42014	2.3287	373.057	4.04219e-83	3.64325e-82	2.33293	-0.30435	8.46975	6.73482e-16	1.31876e-15	24.8928
LYPD3	267.337	3.2923	0.149142	22.0749	5.51379e-108	6.67217e-107	3.28659	2.76286	414.393	4.05481e-92	4.50694e-91	2.20225	1.21033	12.7794	5.40349e-31	1.6651e-30	59.2373
IGHG3	4257.55	5.35643	0.242898	22.0522	9.0985e-108	1.09779e-106	4.81778	6.76061	262.265	5.50702e-59	2.85898e-58	5.80832	2.8144	16.739	1.05647e-46	5.38891e-46	95.2746
FEZF1-AS1	56.6649	5.97495	0.270954	22.0515	9.238e-108	1.11408e-106	5.8219	0.560607	352.801	1.04027e-78	8.4167e-78	4.11176	-2.70743	13.7815	7.23026e-35	2.50083e-34	68.3507
LINC00346	94.3352	2.44398	0.110833	22.0511	9.33268e-108	1.12495e-106	2.44092	1.30095	439.9	1.13794e-97	1.44385e-96	2.02709	0.382931	15.3832	3.19877e-41	1.36101e-40	82.7583
ADGRB2	143.487	2.49147	0.11303	22.0426	1.12576e-107	1.35501e-106	2.47799	1.88627	436.11	7.60515e-97	9.47534e-96	2.53654	0.949458	22.3538	1.4463e-69	1.88619e-68	147.813
CD48	300.903	3.3257	0.150906	22.0382	1.23954e-107	1.4905e-106	2.50576	3.02188	177.373	1.81559e-40	6.19186e-40	2.83648	1.39675	15.5188	9.12686e-42	3.95789e-41	83.9389
C20orf195	33.9567	3.28131	0.148922	22.0338	1.36641e-107	1.64068e-106	3.22136	-0.101078	423.189	4.93632e-94	5.75194e-93	2.76335	-1.5525	17.8324	3.68535e-51	2.20881e-50	105.646
COL16A1	3334.46	2.38106	0.108099	22.0267	1.59672e-107	1.91444e-106	2.38521	6.39103	438.669	2.10942e-97	2.66425e-96	2.09189	5.53189	21.2858	2.9902e-65	3.21149e-64	137.635
CCR6	83.8437	5.19672	0.235945	22.0251	1.6546e-107	1.98289e-106	3.07283	1.24974	93.9373	3.25675e-22	7.27757e-22	5.98184	-1.67525	29.0105	1.94934e-95	1.16077e-93	207.139
HMGA2	204.846	3.72959	0.169336	22.0248	1.66497e-107	1.99435e-106	3.74898	2.41968	396.302	3.51604e-88	3.55918e-87	2.14378	0.441528	9.12462	5.63905e-18	1.17736e-17	29.5522
KRT7	13747.2	3.16772	0.143948	22.006	2.52195e-107	3.01505e-106	3.18551	8.44594	404.943	4.62196e-90	4.89624e-89	2.89151	7.06022	15.4846	1.25262e-41	5.4056e-41	83.3644
IGLC2	5845.26	4.50052	0.204547	22.0024	2.73209e-107	3.2647e-106	4.50515	7.21245	362.54	7.88079e-81	6.68333e-80	4.5917	4.38361	17.4188	1.79795e-49	1.0165e-48	101.505
APOBEC3D	95.7473	2.27545	0.103446	21.9964	3.11505e-107	3.71696e-106	2.26597	1.31899	441.308	5.62112e-98	7.17256e-97	2.30972	0.515156	23.9036	9.20476e-76	1.62447e-74	162.058
MLPH	3467.09	2.4006	0.10921	21.9814	4.33477e-107	5.15502e-106	2.42628	6.44598	452.048	2.58433e-100	3.46311e-99	2.04038	5.56012	17.7168	1.0923e-50	6.43941e-50	104.131
TMEM158	302.373	2.73574	0.124668	21.9442	9.8315e-107	1.16417e-105	2.73651	2.93978	427.746	5.02868e-95	6.0148e-94	2.29352	1.84162	15.7344	1.23588e-42	5.51548e-42	85.8819
IL12RB1	76.7422	2.58977	0.118183	21.9132	1.94417e-106	2.28578e-105	2.2037	1.06546	245.583	2.38414e-55	1.13913e-54	2.53633	-0.00320398	19.8404	2.28333e-59	1.91674e-58	124.429
PLA2G7	161.265	3.67758	0.167951	21.8967	2.79224e-106	3.26586e-105	3.20316	2.09199	263.623	2.78466e-59	1.45234e-58	4.16988	0.132043	22.2331	4.42749e-69	5.62924e-68	146.726
GRAMD2	58.5354	2.64665	0.120907	21.8899	3.24282e-106	3.79108e-105	2.61453	0.637395	428.615	3.25386e-95	3.9051e-94	2.07484	-0.391963	15.9137	2.3379e-43	1.06851e-42	87.707
AC021218.2	92.819	5.57923	0.254909	21.8872	3.44341e-106	4.02179e-105	5.51099	1.27661	339.127	9.8862e-76	7.42092e-75	5.54536	-1.95542	20.1236	1.5957e-60	1.40457e-59	127.12
TNFSF11	106.135	4.3363	0.198136	21.8855	3.57094e-106	4.16878e-105	4.30297	1.46722	372.213	6.17151e-83	5.5363e-82	5.08679	-1.01312	22.7109	5.3092e-71	7.39387e-70	151.145
PHGR1	196.041	4.94304	0.225941	21.8776	4.24458e-106	4.95055e-105	4.87579	2.29409	350.268	3.70466e-78	2.9503e-77	2.70906	-0.908437	9.0292	1.14738e-17	2.37343e-17	28.9646
KRT6A	2008.71	5.18865	0.237251	21.8699	5.02911e-106	5.85457e-105	4.44522	5.68718	233.727	9.17528e-53	4.13938e-52	2.17735	1.98816	5.42056	1.10382e-07	1.64588e-07	6.07968
HTR2B	81.4916	3.35286	0.153468	21.8473	8.24519e-106	9.56712e-105	3.30255	1.11069	405.868	2.90807e-90	3.09384e-89	3.25481	-0.491493	18.2797	5.46914e-53	3.52281e-52	109.807
HMGN1P37	6.53004	3.8952	0.17831	21.8451	8.64726e-106	1.0029e-104	3.79962	-2.13701	677.21	2.70201e-149	1.31042e-147	3.78838	-3.55879	36.8427	5.90814e-123	4.73242e-120	269.84
HAPLN3	482.331	2.68596	0.122984	21.8399	9.6875e-106	1.12302e-104	2.68601	3.61212	424.13	3.07967e-94	3.60543e-93	2.63977	2.55838	18.8777	1.96271e-55	1.39365e-54	115.239
GBP3	1103.94	2.50557	0.11474	21.8369	1.03467e-105	1.1972e-104	2.53432	4.81737	429.004	2.6772e-95	3.22238e-94	2.01814	3.87167	14.7775	8.4585e-39	3.32226e-38	76.8877
SUGCT	156.687	2.7085	0.124072	21.83	1.20526e-105	1.39329e-104	2.69932	2.00538	425.334	1.68428e-94	1.98023e-93	2.24658	0.92996	14.6772	2.11969e-38	8.22278e-38	76.2446
FABP6	43.7957	5.37962	0.246496	21.8244	1.36096e-105	1.57109e-104	5.2932	0.227409	365.776	1.55589e-81	1.341e-80	3.80624	-2.67874	14.4004	2.65531e-37	9.9568e-37	73.926
ALDH3B2	79.626	3.91179	0.179365	21.8091	1.90178e-105	2.18929e-104	3.34192	1.07893	256.962	7.88382e-58	3.99761e-57	2.91147	-0.990244	12.6203	2.17871e-30	6.58227e-30	58.0245
DCHS2	51.991	3.79432	0.17398	21.8089	1.90866e-105	2.19619e-104	3.73951	0.486806	394.075	1.07326e-87	1.07331e-86	3.38065	-1.42047	18.4317	1.30747e-53	8.62307e-53	111.261
SLC15A3	813.968	2.31196	0.106014	21.808	1.94794e-105	2.24036e-104	2.31815	4.36515	430.955	1.00678e-95	1.22366e-94	2.25803	3.5803	22.777	2.88348e-71	4.05204e-70	151.568
PNOC	25.8326	4.30351	0.197367	21.8046	2.09954e-105	2.41359e-104	3.16031	-0.40726	179.576	5.99671e-41	2.0707e-40	3.83448	-2.53293	21.3472	1.68565e-65	1.83501e-64	138.527
IGKV4-1	639.506	4.75617	0.218216	21.7957	2.54963e-105	2.92559e-104	4.75519	4.03277	348.846	7.55768e-78	5.99185e-77	4.90427	0.899401	14.7331	1.27043e-38	4.9593e-38	76.7967
ANGPT2	219.216	2.53228	0.116189	21.7946	2.61344e-105	2.99743e-104	2.55444	2.49726	429.423	2.16984e-95	2.61677e-94	2.43647	1.51405	19.8276	2.57461e-59	2.15762e-58	124.229
TMEM150B	61.8728	3.92199	0.179995	21.7895	2.91837e-105	3.34253e-104	3.87053	0.711048	389.506	1.06005e-86	1.03793e-85	3.66976	-1.35184	17.9688	1.02046e-51	6.26429e-51	106.92
ARHGDIB	2753.85	2.24013	0.102835	21.7837	3.31333e-105	3.78791e-104	2.25301	6.1219	431.903	6.26034e-96	7.64636e-95	2.21961	5.34592	24.378	1.21882e-77	2.36074e-76	166.158
FAM72C	28.3085	3.80716	0.174786	21.7818	3.4521e-105	3.94474e-104	3.667	-0.350488	408.933	6.25875e-91	6.76878e-90	3.95789	-2.12373	21.7945	2.60804e-67	3.05929e-66	142.678
SLC13A5	235.55	4.76332	0.218898	21.7604	5.5033e-105	6.26846e-104	4.75291	2.60827	352.794	1.04413e-78	8.44518e-78	3.56154	-0.508092	11.2605	2.46317e-25	6.40988e-25	46.4369
CDHR5	770.72	3.41628	0.156999	21.7599	5.56455e-105	6.33532e-104	3.43663	4.28901	398.974	9.21186e-89	9.47948e-88	2.5235	2.58992	11.0557	1.35161e-24	3.44683e-24	44.4553
TMEM200A	348.863	2.76408	0.127051	21.7557	6.10526e-105	6.94455e-104	2.77134	3.1729	406.983	1.66248e-90	1.78089e-89	2.88261	2.02338	20.6785	8.75795e-63	8.5215e-62	132.176
CKLF-CMTM1	21.7234	2.29177	0.105368	21.7502	6.87275e-105	7.8104e-104	2.19909	-0.687253	445.939	5.521e-99	7.21157e-98	2.25688	-1.50722	20.105	1.89997e-60	1.66648e-59	126.943
PSORS1C1	131.709	2.86944	0.131938	21.7483	7.16902e-105	8.14337e-104	2.84083	1.75895	416.602	1.33963e-92	1.50654e-91	2.44063	0.540333	13.5798	4.42825e-34	1.49521e-33	66.375
AC005355.2	44.0153	2.48108	0.114146	21.736	9.36364e-105	1.06217e-103	2.44397	0.238541	425.108	1.88632e-94	2.21358e-93	2.26721	-0.731858	16.4059	2.37992e-45	1.15965e-44	92.293
ST8SIA2	33.8016	4.96221	0.228328	21.7328	1.0044e-104	1.13882e-103	4.891	-0.113286	390.09	7.91166e-87	7.77114e-86	4.67956	-2.61112	23.1598	8.45619e-73	1.28425e-71	155.254
PPEF1	32.5174	3.20029	0.147306	21.7255	1.17786e-104	1.33489e-103	3.14992	-0.169107	420.715	1.70534e-93	1.96225e-92	3.09959	-1.61666	19.9309	9.7544e-60	8.32056e-59	125.315
BEND6	52.2278	2.76375	0.127263	21.7168	1.42484e-104	1.61113e-103	2.72681	0.490863	411.887	1.4238e-91	1.56436e-90	2.83842	-0.698608	21.1436	1.12822e-64	1.18356e-63	136.626
MOGAT3	23.7796	6.4609	0.29773	21.7005	2.02734e-104	2.28511e-103	6.42778	-0.605573	376.585	6.89261e-84	6.34596e-83	3.48556	-3.61713	14.5525	6.62714e-38	2.5387e-37	75.3269
TWIST1	143.733	3.61692	0.166883	21.6734	3.65783e-104	4.10427e-103	3.56133	1.87559	386.828	4.05886e-86	3.9262e-85	3.4561	0.00495182	17.6241	2.61202e-50	1.52287e-49	103.64
CH17-360D5.3	24.0447	4.83979	0.223349	21.6692	4.00731e-104	4.49235e-103	4.79471	-0.536625	410.672	2.61787e-91	2.86489e-90	4.20284	-2.86381	20.5089	4.29386e-62	4.06175e-61	130.722
SIGLEC15	50.2845	3.7866	0.174776	21.6654	4.34743e-104	4.87144e-103	3.68721	0.408832	383.871	1.78753e-85	1.70651e-84	3.05688	-1.49212	16.7495	9.57118e-47	4.89117e-46	95.5233
HOXC10	68.9071	5.53929	0.256271	21.615	1.29939e-103	1.4417e-102	5.47983	0.861186	339.812	7.01081e-76	5.28653e-75	3.18418	-2.52671	10.2504	9.40225e-22	2.20003e-21	38.3784
IGKV1-5	609.421	4.87455	0.225576	21.6094	1.46697e-103	1.62473e-102	4.8811	3.96979	339.684	7.47633e-76	5.63072e-75	5.03321	0.681866	14.5169	9.17259e-38	3.49654e-37	74.84
FER1L4	687.278	3.66109	0.169588	21.5882	2.31729e-103	2.55736e-102	3.66773	4.12047	382.75	3.13516e-85	2.97475e-84	2.86978	2.16979	11.9084	1.03129e-27	2.88379e-27	51.6471
CD74	39100.2	2.62767	0.121784	21.5764	2.99198e-103	3.29755e-102	2.63972	9.95159	395.254	5.94279e-88	5.984e-87	3.48344	9.2629	23.752	3.68302e-75	6.32019e-74	160.58
MUC3A	2449.07	3.87457	0.17965	21.5673	3.64565e-103	4.00554e-102	3.88774	5.96348	370.109	1.77218e-82	1.56993e-81	3.63714	3.77125	16.7409	1.03799e-46	5.29789e-46	95.1466
ODAM	100.761	4.11696	0.190901	21.5659	3.75326e-103	4.12195e-102	4.05952	1.38976	365.643	1.66312e-81	1.43144e-80	3.33108	-0.901174	12.9328	1.3994e-31	4.39188e-31	60.7489
TMEM130	191.818	3.13682	0.145497	21.5593	4.33005e-103	4.74909e-102	3.13245	2.32018	391.868	3.24536e-87	3.21753e-86	2.75957	0.858533	16.0909	4.49342e-44	2.09493e-43	89.2752
CCDC144NL-AS1	40.2316	3.28023	0.152176	21.5555	4.70027e-103	5.15286e-102	3.22207	0.125595	401.252	2.93999e-89	3.06221e-88	3.45691	-1.42785	23.1016	1.44458e-72	2.1687e-71	154.734
CTC-512J14.5	7.05226	2.90961	0.135011	21.5509	5.18839e-103	5.67796e-102	2.76886	-2.04675	561.771	3.4623e-124	8.38669e-123	2.95175	-3.13627	25.0797	2.11213e-80	4.83376e-79	172.643
RNF223	40.654	3.74325	0.173833	21.5336	7.5413e-103	8.24199e-102	3.67196	0.128096	385.712	7.10056e-86	6.82858e-85	3.51287	-1.72905	16.9213	1.91617e-47	1.00614e-46	97.1321
CD163L1	109.565	2.70636	0.125868	21.5016	1.5043e-102	1.63328e-101	2.69639	1.51115	413.328	6.9141e-92	7.6508e-91	2.56461	0.38803	18.3706	2.32415e-53	1.51552e-52	110.62
NTM	620.369	3.89567	0.181227	21.4961	1.69467e-102	1.83837e-101	3.97248	3.98995	393.236	1.63478e-87	1.62829e-86	5.15482	1.73445	25.6735	1.01244e-82	2.6242e-81	178.034
C8orf31	54.3381	2.90116	0.134967	21.4953	1.72436e-102	1.86977e-101	2.85991	0.547871	402.486	1.5838e-89	1.65868e-88	2.25257	-0.686004	15.0016	1.07932e-39	4.36349e-39	79.3211
NDP	21.9316	4.23659	0.197139	21.4904	1.91492e-102	2.07549e-101	4.17112	-0.687689	417.392	9.0184e-93	1.01928e-91	4.27056	-2.6852	25.9211	1.10488e-83	3.02818e-82	180.179
MMP16	117.859	2.52186	0.117364	21.4876	2.03299e-102	2.20153e-101	2.52682	1.63164	407.953	1.02247e-90	1.10147e-89	2.39412	0.628652	17.6455	2.13632e-50	1.24905e-49	103.801
PSMD10P2	10.5966	5.12558	0.238607	21.4813	2.33142e-102	2.51922e-101	5.11482	-1.58577	465.009	3.90637e-103	5.58428e-102	3.65763	-3.59615	20.2278	6.0002e-61	5.3863e-60	128.096
PRRX1	1088.61	2.70252	0.125868	21.4712	2.89648e-102	3.12571e-101	2.71996	4.7959	402.818	1.34109e-89	1.40568e-88	2.41686	3.70679	16.9261	1.83123e-47	9.62353e-47	96.8255
SIRPG	36.8879	3.58189	0.166962	21.4533	4.25361e-102	4.58426e-101	2.88436	0.0545605	213.758	2.07956e-48	8.48325e-48	3.43145	-1.72963	20.3593	1.74664e-61	1.60336e-60	129.322
IL20RB	198.262	3.875	0.180626	21.4531	4.26851e-102	4.59832e-101	3.87591	2.36779	370.053	1.82216e-82	1.61305e-81	2.13891	0.194185	10.5962	5.83171e-23	1.41593e-22	40.9513
SLITRK6	85.0968	3.73079	0.173925	21.4505	4.51725e-102	4.85575e-101	3.70483	1.16995	376.828	6.10232e-84	5.62252e-83	2.95454	-0.809589	14.5428	7.24473e-38	2.77229e-37	75.1414
S100A5	5.98174	4.54675	0.211992	21.4477	4.79494e-102	5.15202e-101	4.62829	-2.2601	518.644	8.34937e-115	1.59602e-113	3.19079	-3.84203	23.0473	2.38147e-72	3.53463e-71	154.198
CORIN	153.156	2.8944	0.134961	21.4463	4.94417e-102	5.30776e-101	2.90419	1.99914	399.267	7.95061e-89	8.18837e-88	2.60555	0.721686	15.506	1.02674e-41	4.44551e-41	83.8704
ATP6V0D2	20.2419	3.58982	0.167412	21.4431	5.2983e-102	5.68548e-101	2.95667	-0.741338	234.424	6.46564e-53	2.92597e-52	3.7193	-2.42003	23.5782	1.81115e-74	2.99618e-73	159.078
ILDR2	88.8111	2.37234	0.110655	21.4391	5.77318e-102	6.19239e-101	2.36209	1.22299	414.145	4.59062e-92	5.09793e-91	2.19233	0.33769	18.0513	4.69522e-52	2.92492e-51	107.623
LINC00675	63.6114	4.95385	0.231098	21.4361	6.15397e-102	6.59513e-101	4.90024	0.749152	347.274	1.66214e-77	1.30568e-76	3.74199	-2.14085	13.1976	1.34126e-32	4.33319e-32	63.1427
WFDC3	42.5435	3.60315	0.168209	21.4207	8.56777e-102	9.16614e-101	3.53215	0.188148	389.038	1.34035e-86	1.30878e-85	3.02646	-1.57144	15.356	4.11383e-41	1.74289e-40	82.6147
CKS1BP3	5.95695	4.42294	0.206554	21.413	1.01064e-101	1.08029e-100	4.17965	-2.23327	514.258	7.51249e-114	1.39942e-112	3.27956	-3.74342	23.5866	1.6756e-74	2.78306e-73	159.128
GPR85	31.2845	2.5233	0.117864	21.4086	1.11102e-101	1.18708e-100	2.48171	-0.217311	421.23	1.31775e-93	1.51837e-92	2.76709	-1.26369	22.9841	4.26537e-72	6.23753e-71	153.657
CD247	114.371	2.71922	0.127041	21.4042	1.22169e-101	1.30421e-100	2.3226	1.61641	241.171	2.18493e-54	1.01771e-53	2.33276	0.471348	16.8918	2.52593e-47	1.32129e-46	96.7572
PMEPA1	8290.89	2.24622	0.104952	21.4023	1.27213e-101	1.35747e-100	2.2709	7.72084	407.39	1.35614e-90	1.4565e-89	2.03412	6.93387	18.4183	1.48376e-53	9.75981e-53	110.758
FCGR2A	1131.5	2.40312	0.112288	21.4014	1.29724e-101	1.38367e-100	2.4329	4.85774	412.266	1.17729e-91	1.29523e-90	2.07686	3.9732	16.4189	2.108e-45	1.02897e-44	92.0552
LINC00483	40.4223	5.8135	0.271686	21.3978	1.39954e-101	1.49214e-100	5.68905	0.115735	350.904	2.69307e-78	2.15715e-77	3.87429	-3.00845	14.5205	8.87951e-38	3.38742e-37	75.0224
UBASH3B	343.122	2.41827	0.11302	21.3969	1.42828e-101	1.52148e-100	2.44717	3.14217	412.294	1.16105e-91	1.27793e-90	2.33674	2.23415	18.4586	1.01494e-53	6.72051e-53	111.315
WISP1	474.308	3.4588	0.161747	21.384	1.88462e-101	2.00502e-100	3.46093	3.60723	377.954	3.47073e-84	3.22295e-83	3.92475	1.81298	19.5945	2.30468e-58	1.84724e-57	122.054
RDM1	9.28405	4.16012	0.194691	21.3678	2.66186e-101	2.82585e-100	4.0009	-1.7693	509.932	6.56193e-113	1.19195e-111	3.50884	-3.3584	24.5344	2.94257e-78	5.94041e-77	167.734
HCP5	726.006	2.15021	0.10065	21.3633	2.93625e-101	3.11581e-100	2.1698	4.20819	416.366	1.50781e-92	1.6926e-91	2.01029	3.49878	20.3951	1.24815e-61	1.15429e-60	129.396
AK5	60.2614	3.42387	0.16029	21.3605	3.11755e-101	3.30255e-100	3.35664	0.674048	382.777	3.09239e-85	2.93529e-84	2.62666	-0.987625	16.8039	5.75319e-47	2.96446e-46	96.0115
SYT12	249.848	3.50552	0.164156	21.3548	3.52035e-101	3.72449e-100	3.49511	2.69008	377.26	4.916e-84	4.53789e-83	3.45447	0.862711	15.4833	1.26758e-41	5.46919e-41	83.6618
TICRR	64.8505	2.43958	0.114246	21.3536	3.60644e-101	3.81395e-100	2.43487	0.770558	418.32	5.66398e-93	6.43637e-92	2.25596	-0.169107	16.9997	9.18951e-48	4.88096e-47	97.8017
CYSLTR2	37.9249	2.98594	0.139857	21.3499	3.90392e-101	4.12504e-100	2.95813	0.0488983	407.966	1.01607e-90	1.09505e-89	3.12721	-1.29977	23.027	2.87228e-72	4.2428e-71	154.05
IGLC3	3114.02	4.47821	0.209954	21.3295	6.04655e-101	6.38359e-100	4.48208	6.30306	342.493	1.82757e-76	1.39632e-75	4.64216	3.38201	16.2796	7.73628e-45	3.70277e-44	90.9172
ANKFN1	29.7107	4.12646	0.193507	21.3246	6.71819e-101	7.08363e-100	4.0712	-0.280054	389.152	1.26644e-86	1.23856e-85	3.84806	-2.3386	19.9827	5.9938e-60	5.16778e-59	125.806
RP11-417E7.1	12.4125	4.72986	0.221806	21.3243	6.75879e-101	7.12341e-100	4.58443	-1.42028	465.351	3.292e-103	4.71961e-102	3.66036	-3.34266	22.7478	3.77704e-71	5.27787e-70	151.461
MEI1	68.5966	2.74216	0.12862	21.3199	7.42732e-101	7.82136e-100	2.68841	0.846273	405.167	4.131e-90	4.38362e-89	2.71459	-0.304509	21.7793	3.00386e-67	3.50677e-66	142.528
MYO7B	686.233	3.50546	0.164451	21.3162	8.03009e-101	8.44537e-100	3.51961	4.12438	379.142	1.91276e-84	1.78824e-83	2.63398	2.31747	10.7402	1.80747e-23	4.45692e-23	41.9122
FOXJ1	222.531	3.68048	0.172753	21.3048	1.02407e-100	1.07475e-99	3.66359	2.51563	367.989	5.12836e-82	4.49655e-81	2.19309	0.527333	9.83237	2.53832e-20	5.67777e-20	34.8952
B3GNT6	206.351	7.52314	0.353271	21.2957	1.24561e-100	1.30396e-99	6.25121	2.37399	187.562	1.08289e-42	3.88516e-42	5.33947	-2.55723	15.2097	1.58751e-40	6.59852e-40	81.294
DMBX1	24.7945	5.84329	0.274534	21.2844	1.58366e-100	1.65295e-99	5.72082	-0.521314	391.411	4.0814e-87	4.03605e-86	4.25525	-3.24868	19.6419	1.47625e-58	1.19481e-57	122.619
LINC01426	57.8594	2.28318	0.107384	21.2619	2.55999e-100	2.65971e-99	2.26253	0.618802	409.394	4.96682e-91	5.38563e-90	2.01767	-0.221499	16.1534	2.50981e-44	1.17921e-43	89.9205
HOXA1	23.9424	2.90937	0.136846	21.2602	2.65558e-100	2.75787e-99	2.86517	-0.567436	420.006	2.43357e-93	2.78985e-92	3.10972	-1.85012	22.4546	5.687e-70	7.58806e-69	148.781
CAPN8	1978.69	3.96204	0.186386	21.2572	2.82908e-100	2.93559e-99	3.98478	5.64306	363.588	4.65929e-81	3.97167e-80	4.18426	3.30883	16.7567	8.94859e-47	4.57772e-46	95.3467
RP11-356M20.1	38.8216	3.34909	0.157626	21.2471	3.51008e-100	3.63617e-99	3.2826	0.0715117	385.112	9.59365e-86	9.20835e-85	2.57693	-1.49292	12.8171	3.87697e-31	1.19932e-30	59.7683
HAS2	168.636	3.36081	0.15822	21.2414	3.95979e-100	4.09519e-99	3.35404	2.12623	383.335	2.33795e-85	2.22513e-84	3.53345	0.423179	18.4864	7.81246e-54	5.19387e-53	111.711
IGHV4-39	222.123	5.17517	0.243897	21.2187	6.42267e-100	6.63124e-99	5.17057	2.54008	321.531	6.71998e-72	4.6532e-71	4.94111	-0.917126	15.3086	6.37499e-41	2.68711e-40	82.1538
FAM72B	36.8157	2.4923	0.117495	21.212	7.40635e-100	7.63416e-99	2.42002	-0.00158376	417.261	9.63011e-93	1.08644e-91	2.50146	-0.987952	18.3894	1.94855e-53	1.27529e-52	110.851
SH2D1A	46.1671	3.5798	0.168811	21.206	8.4089e-100	8.65319e-99	2.90112	0.36826	213.098	2.89699e-48	1.17753e-47	3.24268	-1.46147	17.8616	2.80003e-51	1.68715e-50	105.917
AC020571.3	17.9686	3.37315	0.159165	21.1928	1.11362e-99	1.14454e-98	3.3204	-0.946092	427.42	5.92199e-95	7.05609e-94	3.62241	-2.48258	25.1578	1.04468e-80	2.43802e-79	173.367
AMN	532.965	3.63202	0.171387	21.1919	1.13364e-99	1.16464e-98	3.61923	3.74832	370.387	1.54116e-82	1.36722e-81	3.26045	1.79405	13.2741	6.79274e-33	2.21381e-32	63.5665
PPM1N	56.3568	2.38258	0.112434	21.1909	1.15809e-99	1.18926e-98	2.33979	0.569524	409.001	6.04825e-91	6.54397e-90	2.21805	-0.320116	18.9827	7.29923e-56	5.27802e-55	116.396
DOK6	78.7589	2.44082	0.11523	21.1822	1.39406e-99	1.42805e-98	2.43434	1.06616	397.69	1.753e-88	1.78324e-87	2.34066	0.104511	19.3496	2.3087e-57	1.77814e-56	119.822
IGHV3-11	130.172	5.07685	0.239715	21.1787	1.50184e-99	1.53656e-98	4.43777	1.78604	233.552	1.00155e-52	4.51189e-52	4.64571	-1.44283	15.6566	2.54353e-42	1.12242e-41	85.3808
LYPD2	74.5926	7.15722	0.337989	21.1759	1.59406e-99	1.62956e-98	6.00985	1.23541	201.061	1.22519e-45	4.68908e-45	3.08803	-3.3882	10.0411	4.9397e-21	1.12997e-20	36.7702
ENKUR	24.9801	3.50079	0.165368	21.1697	1.81807e-99	1.85703e-98	3.43911	-0.506699	393.833	1.21191e-87	1.2105e-86	3.00898	-2.14338	19.0488	3.91627e-56	2.86689e-55	117.06
FAM26F	82.3496	2.81107	0.13279	21.1693	1.83103e-99	1.8695e-98	2.22814	1.18348	189.425	4.24526e-43	1.53553e-42	2.68434	-0.0947132	18.5554	4.08014e-54	2.74341e-53	112.377
AP000439.3	10.2635	5.28312	0.249572	21.1687	1.85469e-99	1.89289e-98	5.31415	-1.62715	441.215	5.88873e-98	7.51018e-97	3.61491	-3.70164	20.3355	2.18492e-61	1.99756e-60	129.1
ONECUT3	415.596	7.19199	0.33995	21.156	2.42785e-99	2.47377e-98	6.68186	3.37725	231.97	2.21647e-52	9.90412e-52	7.13814	-1.42191	15.2675	9.31894e-41	3.90415e-40	81.791
PLA2G2D	53.9916	6.11673	0.289127	21.1559	2.43588e-99	2.48094e-98	3.56334	0.596688	91.3226	1.22057e-21	2.6852e-21	4.92994	-2.80144	20.4212	9.77108e-62	9.09732e-61	129.903
GPRIN1	163.322	2.32427	0.109873	21.1541	2.52739e-99	2.57308e-98	2.36352	2.07235	433.182	3.29872e-96	4.05699e-95	2.14786	1.20072	17.1872	1.58273e-48	8.62807e-48	99.4638
LINC01561	15.3225	4.86692	0.230077	21.1534	2.56737e-99	2.61165e-98	4.11643	-1.13461	289.259	7.21175e-65	4.26877e-64	3.9227	-3.23293	22.1049	1.45514e-68	1.80663e-67	145.541
TMEM176B	3803.85	2.37415	0.11227	21.1468	2.95269e-99	3.00116e-98	2.36763	6.56733	410.618	2.68886e-91	2.93999e-90	2.35344	5.69094	21.3305	1.97014e-65	2.13068e-64	138.06
MYL9	7503.59	2.36343	0.111796	21.1406	3.36524e-99	3.4135e-98	2.38276	7.57022	398.903	9.5425e-89	9.81565e-88	2.05126	6.68968	18.9463	1.02889e-55	7.40101e-55	115.713
SERPINE2	1262.29	2.7757	0.131331	21.1351	3.78445e-99	3.83557e-98	2.79486	4.99969	394.636	8.10451e-88	8.13432e-87	2.61227	3.83259	19.2548	5.63576e-57	4.26911e-56	118.693
TAGAP	163.197	2.72354	0.128873	21.1336	3.90947e-99	3.96067e-98	2.27079	2.14154	213.731	2.10867e-48	8.60057e-48	2.42875	0.955999	15.6335	3.15123e-42	1.38493e-41	85.0265
HLA-DRA	13053.1	2.98033	0.141121	21.119	5.32019e-99	5.3767e-98	2.99769	8.37862	375.311	1.3054e-83	1.19214e-82	3.45975	7.07804	24.0286	2.94116e-76	5.30371e-75	163.022
BASP1	669.63	2.74068	0.129778	21.1183	5.39938e-99	5.45452e-98	2.74886	4.08931	391.261	4.39966e-87	4.34732e-86	2.86427	2.95608	22.2855	2.7233e-69	3.50374e-68	147.083
SYNC	84.919	2.80043	0.132663	21.1094	6.5246e-99	6.58587e-98	2.78506	1.16373	390.585	6.1729e-87	6.07527e-86	2.37169	-0.0385047	15.3818	3.24025e-41	1.37842e-40	82.7755
LINC01503	101.671	2.76343	0.130958	21.1017	7.67851e-99	7.73175e-98	2.73248	1.39832	394.569	8.38098e-88	8.40162e-87	2.58816	0.210423	18.1844	1.34149e-52	8.52805e-52	108.882
CPNE7	172.838	2.6814	0.127139	21.0903	9.77047e-99	9.82627e-98	2.64028	2.12708	392.806	2.02787e-87	2.01658e-86	2.2455	1.04141	15.7087	1.56964e-42	6.98116e-42	85.7129
FCER1A	70.1926	3.70466	0.175698	21.0855	1.08152e-98	1.08726e-97	3.66026	0.901406	362.267	9.03452e-81	7.65652e-80	3.8531	-1.06141	19.172	1.22799e-56	9.17608e-56	118.195
LINC00707	14.3975	5.91094	0.280391	21.0811	1.18716e-98	1.19201e-97	6.0843	-1.19459	404.47	5.8607e-90	6.18475e-89	3.50407	-3.77037	17.0889	3.98041e-48	2.13888e-47	98.7302
VEGFC	209.807	2.15091	0.102033	21.0805	1.20188e-98	1.2063e-97	2.16126	2.43053	405.007	4.47795e-90	4.74774e-89	2.01027	1.69662	19.7042	8.21905e-59	6.73555e-58	123.05
SNCAIP	109.851	3.34257	0.158647	21.0693	1.52163e-98	1.52415e-97	3.30231	1.50198	374.415	2.0459e-83	1.85815e-82	3.28528	-0.173917	20.1827	9.16155e-61	8.17135e-60	127.642
GREM1	3549.86	3.87308	0.183842	21.0675	1.58189e-98	1.58386e-97	3.89542	6.50741	353.66	6.76378e-79	5.5012e-78	3.88079	4.24111	17.0659	4.93623e-48	2.64277e-47	98.1723
RP5-1028K7.2	10.9751	4.60878	0.218797	21.0642	1.69359e-98	1.69503e-97	3.8424	-1.55092	304.867	2.86724e-68	1.83166e-67	3.7441	-3.37816	24.6498	1.03244e-78	2.13995e-77	168.777
TROAP	136.813	2.69595	0.128069	21.0508	2.24708e-98	2.24355e-97	2.68409	1.80705	398.89	9.60802e-89	9.87487e-88	2.57711	0.668234	17.252	8.61022e-49	4.74374e-48	100.115
CACNG4	265.022	3.82168	0.181622	21.042	2.7072e-98	2.6997e-97	3.7976	2.76136	354.072	5.50159e-79	4.48048e-78	2.89074	0.587371	11.6372	1.03764e-26	2.81376e-26	49.4976
IGHV5-51	207.647	5.11607	0.243145	21.0412	2.75124e-98	2.74251e-97	5.10517	2.42982	319.783	1.61516e-71	1.10913e-70	5.22257	-0.94413	16.2186	1.36678e-44	6.48547e-44	90.5663
VNN1	868.274	3.77063	0.17929	21.0309	3.42051e-98	3.40692e-97	3.74983	4.4522	355.237	3.06697e-79	2.51257e-78	3.24459	2.32657	13.544	6.09981e-34	2.05208e-33	65.9227
SPRR1B	170.097	4.96684	0.236194	21.0287	3.58688e-98	3.56977e-97	4.29268	2.13674	233.049	1.28971e-52	5.79322e-52	2.53309	-1.17071	7.67326	1.65688e-13	3.01054e-13	19.5324
NOG	33.0056	3.39103	0.161293	21.0241	3.94876e-98	3.9252e-97	3.34414	-0.136637	382.696	3.22082e-85	3.05253e-84	3.26619	-1.7779	18.7269	8.11797e-55	5.60248e-54	114.036
IGFBP5	19300.8	2.69472	0.128217	21.0169	4.59487e-98	4.56016e-97	2.72846	8.95399	377.448	4.47374e-84	4.13733e-83	2.89496	7.97302	19.1971	9.70221e-57	7.27622e-56	118.145
SOX21	71.9904	5.66655	0.26972	21.009	5.42416e-98	5.37674e-97	5.61517	0.929311	318.003	3.94339e-71	2.68196e-70	4.82738	-2.4354	15.7157	1.46998e-42	6.54376e-42	85.9533
CCL15	61.0613	5.07796	0.241709	21.0086	5.47255e-98	5.42254e-97	4.94372	0.677448	328.023	2.5899e-73	1.84851e-72	4.44024	-2.20678	17.8244	3.9715e-51	2.37801e-50	105.585
DNAH2	192.497	2.95605	0.140758	21.0009	6.42883e-98	6.36754e-97	2.96063	2.30417	387.174	3.41296e-86	3.30528e-85	2.25975	0.96675	13.0681	4.23118e-32	1.34906e-31	61.7963
SLAMF7	240.931	3.29911	0.157158	20.9924	7.70226e-98	7.61668e-97	3.298	2.63476	375.865	9.88881e-84	9.06419e-83	3.6256	0.981061	19.9091	1.19686e-59	1.01465e-58	125.039
DRP2	55.8464	3.31062	0.15772	20.9904	8.02137e-98	7.92593e-97	3.26196	0.576132	372.756	4.7004e-83	4.23036e-82	3.4645	-1.06987	19.4407	9.79335e-58	7.67125e-57	120.715
RP11-400N13.3	15.7103	5.64486	0.26893	20.99	8.09119e-98	7.99174e-97	4.7034	-1.08754	269.112	1.77228e-60	9.52751e-60	4.14824	-3.45268	21.2345	4.82994e-65	5.13189e-64	137.475
RP11-676M6.1	21.6288	2.13115	0.101559	20.9843	9.13522e-98	9.01219e-97	2.04492	-0.681373	406.582	2.03337e-90	2.1707e-89	2.18564	-1.45369	19.0492	3.90317e-56	2.85814e-55	117.052
IGLV1-40	390.721	4.71996	0.225214	20.9576	1.59836e-97	1.56811e-96	4.69706	3.3131	324.51	1.5087e-72	1.06156e-71	4.80809	0.176707	14.1393	2.84884e-36	1.03089e-35	71.4418
GBP5	218.691	2.96933	0.141734	20.95	1.87564e-97	1.83797e-96	2.51652	2.56581	221.868	3.54e-50	1.50362e-49	2.43729	1.16567	14.2021	1.61207e-36	5.88838e-36	71.9112
TMEM176A	2493.49	2.34992	0.112188	20.9463	2.02739e-97	1.98432e-96	2.32986	5.94822	406.917	1.71867e-90	1.84029e-89	2.17256	5.09986	21.0355	3.10063e-64	3.19468e-63	135.309
CD68	3329.33	3.01401	0.14395	20.9379	2.41879e-97	2.36367e-96	3.02692	6.4066	373.168	3.82228e-83	3.45005e-82	3.56215	4.97153	24.9136	9.47432e-80	2.08192e-78	171.074
HNRNPA1P4	7.70268	3.3648	0.160765	20.9299	2.85965e-97	2.79119e-96	3.21299	-1.96374	544.85	1.66053e-120	3.66187e-119	3.41417	-3.24564	29.5033	2.88704e-97	1.97488e-95	211.22
DUOX2	4612.01	4.86259	0.232388	20.9245	3.2043e-97	3.12268e-96	4.85829	6.87644	314.697	2.07077e-70	1.38934e-69	5.75254	3.34567	17.1338	2.61091e-48	1.41122e-47	98.9369
PLXNC1	673.843	2.20752	0.105535	20.9175	3.70986e-97	3.61253e-96	2.23628	4.11187	395.212	6.07047e-88	6.10514e-87	2.01195	3.35083	18.757	6.11297e-55	4.24353e-54	114.022
LINC00494	20.8152	4.89828	0.234655	20.8744	9.15347e-97	8.87158e-96	2.68812	-0.636493	89.5375	3.00882e-21	6.54986e-21	3.45481	-3.09925	17.7753	6.29993e-51	3.73974e-50	105.139
TPRG1	145.709	3.10517	0.148776	20.8714	9.7387e-97	9.4351e-96	3.07468	1.90649	372.395	5.63361e-83	5.0629e-82	2.71703	0.435309	16.598	3.95363e-46	1.98083e-45	94.0211
CXCL9	549.112	4.44662	0.213052	20.871	9.81922e-97	9.50941e-96	4.12074	3.85575	268.556	2.3424e-60	1.25624e-59	4.53305	0.880804	16.763	8.44089e-47	4.32334e-46	95.5538
HNRNPA1P21	11.0635	4.74757	0.227592	20.86	1.23656e-96	1.19568e-95	4.18257	-1.51616	349.138	6.52983e-78	5.18192e-77	4.07487	-3.4178	28.0066	1.13768e-91	5.29022e-90	198.43
RPL13AP20	23.3243	2.68172	0.128698	20.8374	1.98477e-96	1.91468e-95	2.60211	-0.655717	420.129	2.28714e-93	2.62682e-92	2.41529	-1.65048	19.8543	2.00409e-59	1.68576e-58	124.598
LGALS9	2778.7	2.16517	0.103911	20.8367	2.01231e-96	1.94049e-95	2.17325	6.12677	403.022	1.21078e-89	1.27232e-88	2.08118	5.36465	20.3509	1.8905e-61	1.73221e-60	128.891
CDX1	33.4649	4.5227	0.217212	20.8216	2.75635e-96	2.64974e-95	5.87986	1.16914	375.162	1.40676e-83	1.28377e-82	3.56102	-2.48438	16.6912	1.65177e-46	8.35169e-46	95.0076
RP11-204C16.4	11.6014	3.2998	0.158507	20.818	2.97417e-96	2.85693e-95	3.24241	-1.46743	441.959	4.05511e-98	5.19569e-97	3.3018	-2.81479	23.5908	1.6122e-74	2.68135e-73	159.184
TP63	88.7785	3.82117	0.183644	20.8075	3.70393e-96	3.55243e-95	3.77575	1.21226	350.784	2.85964e-78	2.28762e-77	3.0163	-0.911352	14.8144	6.02589e-39	2.37808e-38	77.6217
EPHX3	62.0944	3.5294	0.16965	20.804	3.98537e-96	3.81793e-95	3.46818	0.71884	360.687	1.99509e-80	1.67762e-79	2.96807	-1.09237	15.9892	1.15831e-43	5.32729e-43	88.4405
RAET1L	37.7525	4.48148	0.215458	20.7998	4.34707e-96	4.16283e-95	4.39005	0.0459128	345.346	4.37167e-77	3.39546e-76	3.83517	-2.33039	16.8573	3.48969e-47	1.81471e-46	96.5508
TNFRSF9	44.3857	3.39448	0.163304	20.7863	5.76218e-96	5.5031e-95	2.71539	0.315424	192.041	1.14e-43	4.1776e-43	3.68535	-1.43918	21.8823	1.15237e-67	1.37174e-66	143.493
RPLP0P2	89.7121	3.27013	0.157341	20.7837	6.07659e-96	5.80115e-95	3.58493	1.53521	368.036	5.00898e-82	4.39343e-81	3.83261	-0.403536	23.1292	1.12004e-72	1.69068e-71	154.988
FCMR	243.096	3.14723	0.151428	20.7836	6.08788e-96	5.80969e-95	2.13694	2.74971	124.023	8.32524e-29	2.17193e-28	2.08634	1.15084	11.6711	7.786e-27	2.1178e-26	49.7172
EMP1	4791.64	2.25617	0.108558	20.7831	6.16037e-96	5.87661e-95	2.28866	6.93249	391.17	4.60398e-87	4.54017e-86	2.0371	6.09249	18.7186	8.77868e-55	6.05005e-54	113.554
SLC22A4	51.7846	2.24054	0.107809	20.7824	6.24087e-96	5.95112e-95	2.22224	0.46747	393.684	1.30582e-87	1.30273e-86	2.06233	-0.362922	20.0521	3.12483e-60	2.72064e-59	126.423
DKK4	16.5109	5.49722	0.264531	20.781	6.43273e-96	6.13172e-95	5.83697	-0.692996	380.789	8.38025e-85	7.8673e-84	3.49435	-3.52006	16.5664	5.30909e-46	2.64666e-45	93.8614
RP13-463N16.6	13.5634	5.30852	0.255513	20.7759	7.14697e-96	6.80208e-95	5.24175	-1.31404	438.463	2.33832e-97	2.95184e-96	3.91365	-3.5145	21.2209	5.48113e-65	5.81136e-64	137.348
TCL1A	108.874	7.13955	0.343716	20.7717	7.81038e-96	7.42778e-95	2.92278	1.60856	45.3668	1.63381e-11	2.73893e-11	3.26771	-3.22508	10.5429	8.97899e-23	2.16779e-22	40.7327
HOXD9	43.5637	2.43186	0.117132	20.7617	9.61368e-96	9.12179e-95	2.37952	0.216787	393.621	1.34738e-87	1.34311e-86	2.21274	-0.731883	19.2971	3.78538e-57	2.88948e-56	119.358
LINC01504	23.4686	2.84593	0.137082	20.7607	9.8042e-96	9.29901e-95	2.78535	-0.608873	398.42	1.21595e-88	1.24611e-87	2.9176	-1.85673	19.4385	1.00008e-57	7.8288e-57	120.708
SDK2	99.6748	3.17203	0.152794	20.7602	9.92285e-96	9.40795e-95	3.15198	1.38853	368.4	4.1744e-82	3.66789e-81	3.04446	-0.181713	19.9634	7.18746e-60	6.17549e-59	125.588
GREB1L	70.4021	3.02778	0.145861	20.758	1.03774e-95	9.83142e-95	3.01708	0.906054	373.981	2.54282e-83	2.30357e-82	2.60138	-0.517662	14.3437	4.4502e-37	1.65547e-36	73.3182
CCR7	172.391	3.58732	0.172836	20.7556	1.09132e-95	1.03351e-94	2.79525	2.20265	181.896	1.86792e-41	6.51987e-41	2.55033	0.244281	12.2131	7.51142e-29	2.17461e-28	54.4205
PLEKHO1	951.525	2.16745	0.104451	20.7509	1.20241e-95	1.13741e-94	2.17042	4.58329	398.687	1.06367e-88	1.0923e-87	2.09661	3.86351	22.1065	1.43464e-68	1.78386e-67	145.34
IGHM	7179.83	4.5232	0.218055	20.7434	1.40731e-95	1.32921e-94	4.02774	7.52565	240.997	2.38447e-54	1.11002e-53	4.14316	4.43397	15.0971	4.48239e-40	1.83606e-39	79.8939
RP11-60L3.1	14.0833	5.39868	0.260398	20.7324	1.76697e-95	1.66701e-94	5.35863	-1.23274	423.092	5.18078e-94	6.03112e-93	3.90164	-3.51183	22.3	2.38229e-69	3.07616e-68	147.338
COL14A1	2499.72	2.85446	0.13773	20.725	2.06317e-95	1.94276e-94	2.8789	5.99945	370.074	1.80368e-82	1.59726e-81	2.4973	4.72922	17.0757	4.5032e-48	2.41509e-47	98.1657
IGLV2-23	350.744	4.67899	0.225784	20.7233	2.13485e-95	2.00949e-94	4.678	3.17747	319.144	2.22468e-71	1.52263e-70	5.11774	0.0751051	15.2657	9.47415e-41	3.96716e-40	81.7161
IGKV1-17	179.269	5.19762	0.250846	20.7204	2.26825e-95	2.13264e-94	5.17324	2.21792	307.281	8.54042e-69	5.53267e-68	4.72078	-1.25207	15.5932	4.57821e-42	2.00249e-41	84.7886
TM6SF2	43.6638	2.87296	0.138723	20.71	2.81515e-95	2.64284e-94	2.79678	0.243444	374.153	2.33287e-83	2.11568e-82	2.53822	-1.01409	17.2967	5.6609e-49	3.13693e-48	100.615
ARL9	19.4339	3.25718	0.15741	20.6923	4.06016e-95	3.79872e-94	3.18238	-0.878998	404.924	4.66633e-90	4.94113e-89	3.07078	-2.32402	22.9572	5.46585e-72	7.93699e-71	153.398
C2orf54	184.225	3.34185	0.16154	20.6874	4.50184e-95	4.20878e-94	3.33913	2.2465	362.022	1.02155e-80	8.64267e-80	3.47717	0.509716	17.2719	7.14461e-49	3.9459e-48	100.318
XXbac-B444P24.8	24.7919	4.93111	0.238739	20.6548	8.83896e-95	8.21408e-94	4.82997	-0.515319	354.272	4.97655e-79	4.05955e-78	3.53225	-3.00341	14.656	2.57204e-38	9.95887e-38	76.2565
UBE2SP1	16.4152	3.35747	0.16262	20.6461	1.05873e-94	9.83142e-94	3.08957	-1.06861	380.809	8.29515e-85	7.7933e-84	2.96982	-2.469	17.971	1.00031e-51	6.14366e-51	106.964
COL6A3	25440.7	2.47083	0.119686	20.6443	1.09782e-94	1.01792e-93	2.50009	9.34484	369.072	2.98088e-82	2.63222e-81	2.51927	8.58174	16.3183	5.39333e-45	2.5979e-44	91.1769
FOXD2	45.1315	2.43406	0.117907	20.644	1.10609e-94	1.02483e-93	2.38854	0.277667	383.904	1.75819e-85	1.67914e-84	2.0685	-0.67011	16.3159	5.5143e-45	2.6536e-44	91.4531
NRIP3	57.3953	2.26109	0.109561	20.6376	1.2605e-94	1.16615e-93	2.24267	0.610104	390.976	5.07408e-87	4.9978e-86	2.06302	-0.23799	17.5866	3.71612e-50	2.15244e-49	103.296
RP11-805J14.5	142.847	2.34673	0.113729	20.6344	1.348e-94	1.24617e-93	2.335	1.86766	398.26	1.31728e-88	1.34606e-87	2.77654	0.907265	18.9101	1.44626e-55	1.03315e-54	115.658
IGLL5	888.591	4.4037	0.213675	20.6093	2.2632e-94	2.08293e-93	4.39975	4.50365	325.068	1.14009e-72	8.03338e-72	4.52534	1.61525	13.7242	1.21084e-34	4.16433e-34	67.6268
SERPINB4	48.4382	5.87011	0.284863	20.6068	2.38473e-94	2.19397e-93	5.77032	0.376381	318.05	3.85159e-71	2.62024e-70	3.75184	-2.96791	14.5127	9.5322e-38	3.6325e-37	74.9517
HIST1H2BJ	21.6114	3.40854	0.165611	20.5816	4.01131e-94	3.6877e-93	3.33842	-0.721315	382.849	2.98267e-85	2.83222e-84	3.11601	-2.29296	18.4792	8.36289e-54	5.55386e-53	111.723
ZFPM2-AS1	20.4506	4.19651	0.203998	20.5713	4.96106e-94	4.55241e-93	4.12749	-0.773486	373.941	2.59526e-83	2.34936e-82	3.35467	-2.8041	16.5637	5.44425e-46	2.71349e-45	93.8276
IGHV3-30	513.836	5.22904	0.254247	20.5668	5.44553e-94	4.99328e-93	5.2471	3.75021	309.454	2.87252e-69	1.88299e-68	5.05466	-0.00827707	14.1012	4.02546e-36	1.45095e-35	71.1092
MMP2	13061.5	2.54914	0.123975	20.5617	6.0438e-94	5.53777e-93	2.56974	8.37565	368.36	4.25879e-82	3.74072e-81	2.30028	7.40825	15.9312	1.98671e-43	9.09344e-43	87.506
SLAMF6	137.023	2.8959	0.140884	20.5552	6.91483e-94	6.32654e-93	2.22436	1.91218	165.821	6.05346e-38	1.94883e-37	2.51134	0.531413	14.4191	2.23951e-37	8.42055e-37	73.9319
HS3ST3A1	54.0302	3.92335	0.190871	20.5549	6.95058e-94	6.3569e-93	3.81042	0.502161	349.521	5.38782e-78	4.28386e-77	3.65579	-1.57106	18.9033	1.5421e-55	1.09908e-54	115.686
HLA-DPB1	4168.06	2.66326	0.129578	20.5534	7.17873e-94	6.56073e-93	2.67265	6.72116	372.682	4.87801e-83	4.38703e-82	2.74522	5.58556	22.7644	3.23849e-71	4.53552e-70	151.386
HOXC8	24.0748	3.81128	0.185469	20.5495	7.77788e-94	7.10569e-93	3.7516	-0.567292	372.924	4.32156e-83	3.89364e-82	3.58228	-2.42801	18.4795	8.33864e-54	5.53924e-53	111.727
IGHV3-21	191.572	5.10721	0.248822	20.5256	1.27291e-93	1.15949e-92	5.08308	2.31998	306.906	1.03099e-68	6.65986e-68	5.31544	-1.05645	16.8274	4.61905e-47	2.39248e-46	96.2365
IL1R2	450.301	3.54313	0.172657	20.5212	1.39101e-93	1.26428e-92	3.55086	3.52148	347.759	1.30341e-77	1.02779e-76	2.67913	1.54867	12.4238	1.20977e-29	3.58e-29	56.1234
MMEL1	115.369	2.6418	0.128745	20.5196	1.44026e-93	1.30856e-92	2.62072	1.57413	375.072	1.47184e-83	1.34216e-82	2.08181	0.479328	12.4487	9.74253e-30	2.89167e-29	56.4281
HOXA11	24.0273	5.53302	0.269679	20.5171	1.51584e-93	1.37623e-92	5.36771	-0.583752	346.306	2.70092e-77	2.1057e-76	3.2723	-3.32755	12.8375	3.23994e-31	1.00476e-30	60.0198
RP11-347C12.3	73.3648	2.68407	0.130945	20.4977	2.25894e-93	2.04565e-92	2.63558	0.937151	385.259	8.91338e-86	8.56202e-85	2.39737	-0.180687	15.9346	1.92413e-43	8.80862e-43	87.8903
IGHV1-18	162.787	5.34045	0.26072	20.4835	3.02289e-93	2.72752e-92	5.32363	2.08889	297.37	1.23236e-66	7.58194e-66	5.0587	-1.46088	15.6938	1.80165e-42	8.003e-42	85.725
SFRP2	11691.3	3.54608	0.173197	20.4742	3.65486e-93	3.29535e-92	3.54581	8.2184	336.763	3.2347e-75	2.39907e-74	3.99588	6.3108	19.159	1.38834e-56	1.03525e-55	117.76
DRAXIN	17.4318	2.85365	0.139412	20.4691	4.05912e-93	3.65586e-92	2.80151	-0.977821	395.696	4.76335e-88	4.81003e-87	2.95664	-2.22065	21.8772	1.20742e-67	1.43521e-66	143.444
ZBP1	76.228	3.26518	0.159637	20.4538	5.5537e-93	4.99652e-92	3.21848	0.995324	359.092	4.43877e-80	3.70235e-79	3.37867	-0.640968	20.0392	3.52624e-60	3.06261e-59	126.311
NNMT	4304.72	2.42243	0.118571	20.4303	9.00364e-93	8.08277e-92	2.42005	6.75621	375.842	1.00045e-83	9.16684e-83	2.37714	5.79374	20.3285	2.33263e-61	2.1279e-60	128.688
MFAP5	801.902	3.19091	0.156231	20.4243	1.01696e-92	9.11963e-92	3.20573	4.35342	354.925	3.58573e-79	2.92982e-78	2.93942	2.76079	13.4055	2.10527e-33	6.97571e-33	64.6383
TNFRSF18	43.0172	3.13971	0.153761	20.4194	1.12331e-92	1.00588e-91	3.08882	0.195628	367.77	5.72461e-82	4.99992e-81	3.36244	-1.31721	21.7224	5.1007e-67	5.89644e-66	142.011
AIM2	42.3537	3.71378	0.182072	20.3973	1.76596e-92	1.57397e-91	2.3968	0.302213	114.982	7.9403e-27	1.98536e-26	2.73	-1.72327	13.7667	8.25839e-35	2.85287e-34	68.1844
CMTM1	24.943	2.1347	0.104697	20.3892	2.08322e-92	1.85407e-91	2.09962	-0.504516	387.024	3.679e-86	3.56153e-85	2.03872	-1.29533	17.4902	9.19314e-50	5.25616e-49	102.435
CTD-3010D24.3	16.8129	3.022	0.148251	20.3844	2.3011e-92	2.04505e-91	2.9398	-1.06565	398.174	1.37511e-88	1.40343e-87	2.63157	-2.33052	17.7021	1.25433e-50	7.3859e-50	104.445
RP3-439F8.1	16.6895	3.676	0.180338	20.384	2.32051e-92	2.06156e-91	3.61076	-1.04002	388.7	1.58777e-86	1.54733e-85	3.60099	-2.74022	22.7675	3.14876e-71	4.41236e-70	151.65
CD79B	206.709	3.51385	0.172386	20.3837	2.33506e-92	2.07374e-91	2.20304	2.52578	104.114	1.90958e-24	4.50301e-24	2.07666	0.538072	10.5431	8.96236e-23	2.16399e-22	40.4918
FAM155A	90.6455	2.40711	0.118113	20.3797	2.53415e-92	2.24975e-91	2.40123	1.2589	367.924	5.29795e-82	4.63706e-81	2.28908	0.282173	16.9469	1.50735e-47	7.95007e-47	97.2834
CCRL2	158.682	2.25293	0.110596	20.3708	3.03982e-92	2.69578e-91	2.25516	2.02618	384.367	1.3936e-85	1.33248e-84	2.19992	1.17895	17.5657	4.52335e-50	2.61086e-49	103.012
RP11-550F7.1	4.60869	3.63283	0.178382	20.3654	3.38742e-92	3.00296e-91	3.55407	-2.509	543.166	3.85991e-120	8.41487e-119	3.06754	-3.78327	26.7375	7.77693e-87	2.60255e-85	187.344
STAC	57.1328	3.22141	0.158211	20.3614	3.67583e-92	3.25632e-91	3.19054	0.624765	353.384	7.76567e-79	6.3078e-78	3.06333	-0.991804	17.6464	2.11796e-50	1.2386e-49	103.887
AC133644.2	26.2518	2.4162	0.118673	20.3602	3.77235e-92	3.34063e-91	2.35105	-0.459183	391.232	4.46385e-87	4.40899e-86	2.47103	-1.42285	21.0365	3.07113e-64	3.1656e-63	135.637
PTK6	875.37	2.87727	0.14137	20.3527	4.39181e-92	3.88642e-91	2.90374	4.4698	368.803	3.41051e-82	3.00947e-81	2.50688	3.14085	12.1329	1.50131e-28	4.30574e-28	53.4578
CA14	25.893	3.0709	0.150885	20.3526	4.40127e-92	3.8934e-91	2.99794	-0.482113	371.561	8.5576e-83	7.6602e-82	2.3977	-1.8252	15.3949	2.87021e-41	1.22394e-40	82.983
ATP2C2	415.941	3.09485	0.152178	20.3371	6.04101e-92	5.33634e-91	3.09416	3.4	359.535	3.55422e-80	2.97154e-79	3.22638	1.87244	17.0873	4.04078e-48	2.17038e-47	98.5001
APOC1	1300.12	3.52244	0.17325	20.3315	6.76528e-92	5.96974e-91	2.9623	5.07777	210.786	9.25447e-48	3.71721e-47	3.83074	3.10793	20.7247	5.68549e-63	5.57349e-62	132.574
P2RY10	29.4088	3.83825	0.188833	20.3261	7.5521e-92	6.65459e-91	2.71907	-0.203837	143.1	5.58842e-33	1.60832e-32	3.31534	-2.23577	17.6969	1.31704e-50	7.7496e-50	104.394
KRT8P32	7.63208	3.29911	0.162311	20.3259	7.58888e-92	6.68462e-91	3.22063	-1.97869	474.497	3.36612e-105	5.02913e-104	2.97809	-3.24306	22.2627	3.36427e-69	4.31276e-68	146.993
IGHV3-23	469.634	4.8051	0.236407	20.3255	7.65199e-92	6.73782e-91	4.84813	3.60239	308.918	3.75694e-69	2.45432e-68	5.01871	0.198517	14.1154	3.53828e-36	1.27684e-35	71.2269
COL22A1	297.15	3.51546	0.172972	20.3239	7.90416e-92	6.9574e-91	3.49474	2.93126	337.161	2.64997e-75	1.96951e-74	3.89631	0.971516	18.729	7.95934e-55	5.49453e-54	113.967
CTA-384D8.35	23.2538	3.89317	0.191559	20.3236	7.94509e-92	6.99095e-91	3.79731	-0.611036	366.266	1.21685e-81	1.05177e-80	3.84493	-2.50974	21.9671	5.2374e-68	6.3501e-67	144.273
RP11-304L19.3	43.4439	2.66048	0.13102	20.3059	1.13923e-91	1.00029e-90	2.58785	0.208461	374.718	1.75788e-83	1.60007e-82	2.06228	-0.856248	13.7843	7.04619e-35	2.43784e-34	68.2972
LINC00922	10.1023	5.003	0.24639	20.3052	1.15711e-91	1.01563e-90	4.3171	-1.62267	305.453	2.13706e-68	1.37013e-67	3.77173	-3.61751	22.4287	7.22702e-70	9.59135e-69	148.522
CEACAM7	980.188	4.0583	0.200047	20.2868	1.68248e-91	1.47312e-90	4.06698	4.6493	321.074	8.45078e-72	5.83216e-71	2.48829	2.12074	7.21166	3.39658e-12	5.93153e-12	16.2413
FERMT3	963.28	2.41267	0.118964	20.2807	1.90435e-91	1.66621e-90	2.42213	4.60739	374.343	2.12118e-83	1.92581e-82	2.16198	3.68442	18.0103	6.91059e-52	4.27177e-51	106.983
IFITM10	284.783	2.75527	0.135929	20.2699	2.37228e-91	2.07124e-90	2.75698	2.84412	373.144	3.86945e-83	3.4901e-82	2.23336	1.6437	15.0671	5.90924e-40	2.41098e-39	79.7474
AP000349.2	848.588	6.12952	0.302407	20.2691	2.40891e-91	2.10248e-90	5.31817	4.42572	211.213	7.46916e-48	3.00692e-47	8.3307	-0.00445806	23.7416	4.05168e-75	6.93844e-74	160.59
CD3G	59.8097	3.05892	0.150946	20.265	2.61786e-91	2.28245e-90	2.54489	0.725912	207.836	4.07466e-47	1.61523e-46	2.84682	-0.782781	17.0639	5.03046e-48	2.6909e-47	98.4306
RP11-426C22.4	31.1455	3.50197	0.173022	20.24	4.35064e-91	3.77597e-90	3.45884	-0.211908	355.385	2.84762e-79	2.33595e-78	3.90675	-1.98872	22.7037	5.67701e-71	7.90168e-70	151.073
MTND4P12	407.45	4.54183	0.224659	20.2165	7.00514e-91	6.05867e-90	3.59536	3.42198	176.316	3.08889e-40	1.04839e-39	3.40708	0.246619	8.87396	3.60964e-17	7.34681e-17	27.7456
IGFBP1	85.1167	4.76731	0.235901	20.209	8.16329e-91	7.05543e-90	4.26497	1.15158	239.363	5.41413e-54	2.49793e-53	3.88783	-1.87375	15.4563	1.62708e-41	6.99237e-41	83.5492
RP11-417E7.2	10.1018	5.26398	0.260633	20.1969	1.04334e-90	9.00493e-90	4.42332	-1.6408	267	5.11372e-60	2.71496e-59	3.49965	-3.7769	19.3544	2.2073e-57	1.70216e-56	119.928
S1PR4	90.5953	2.63202	0.130365	20.1896	1.20859e-90	1.04167e-89	2.22704	1.27573	219.846	9.7694e-50	4.10602e-49	2.26111	0.135344	15.7955	7.0127e-43	3.15629e-42	86.5828
PVT1	107.948	2.68803	0.133145	20.1887	1.22976e-90	1.05955e-89	2.66522	1.46981	368.839	3.34909e-82	2.95632e-81	2.56159	0.285224	16.3058	6.05608e-45	2.91149e-44	91.3098
MARCO	412.952	4.16543	0.206392	20.1821	1.40706e-90	1.21147e-89	3.31865	3.46037	178.559	1.00005e-40	3.43414e-40	3.98804	0.722078	12.4005	1.48199e-29	4.37929e-29	56.015
C11orf53	51.9261	3.3532	0.166184	20.1776	1.5401e-90	1.32555e-89	3.28831	0.456838	343.549	1.07662e-76	8.28949e-76	2.90688	-1.22931	14.301	6.55939e-37	2.42159e-36	72.9703
UCP2	1414.21	2.34922	0.116581	20.151	2.63951e-90	2.26553e-89	2.35352	5.15071	374.909	1.59755e-83	1.4552e-82	2.33613	4.2668	22.6087	1.3661e-70	1.86793e-69	149.977
CDKN2A	270.76	3.84541	0.190889	20.1447	2.99322e-90	2.56468e-89	3.84684	2.80471	326.072	6.89251e-73	4.8774e-72	2.8536	0.460334	11.638	1.02988e-26	2.79302e-26	49.5156
TMEM40	31.5459	4.78242	0.23745	20.1408	3.24304e-90	2.77587e-89	3.81819	-0.179271	195.604	1.9015e-44	7.08846e-44	2.81735	-2.87296	12.0449	3.20156e-28	9.08756e-28	53.1633
ROS1	40.7778	4.61549	0.229204	20.137	3.49633e-90	2.99164e-89	4.55256	0.165695	319.385	1.97201e-71	1.35044e-70	2.95065	-2.48775	12.3847	1.69956e-29	5.01386e-29	56.0616
APOE	5274.07	3.0177	0.149897	20.1319	3.87858e-90	3.31643e-89	2.53253	7.09612	205.465	1.34068e-46	5.24093e-46	2.74207	5.61447	17.8489	3.15422e-51	1.89735e-50	105.399
TRIM54	180.574	3.65246	0.181453	20.129	4.11538e-90	3.51769e-89	3.58414	2.15309	335.04	7.6748e-75	5.66171e-74	2.96854	0.125765	11.8547	1.63131e-27	4.52997e-27	51.3735
SIT1	49.4866	3.37105	0.167493	20.1265	4.3257e-90	3.69619e-89	2.46897	0.483883	149.48	2.25208e-34	6.69316e-34	2.98568	-1.30026	16.9525	1.42975e-47	7.54885e-47	97.4098
RP11-400K9.4	44.63	2.72488	0.135411	20.1231	4.63187e-90	3.95237e-89	2.69883	0.292649	358.076	7.38835e-80	6.13579e-79	2.47809	-0.914124	16.7857	6.8235e-47	3.50723e-46	95.8385
HLA-DPA1	5153.45	2.64356	0.131382	20.1212	4.8177e-90	4.10953e-89	2.66422	7.03829	356.571	1.57157e-79	1.29733e-78	2.74411	5.88868	21.6426	1.07221e-66	1.22522e-65	140.982
LY96	122.095	2.36259	0.117432	20.1188	5.05212e-90	4.30357e-89	2.34297	1.65852	367.453	6.711e-82	5.8491e-81	2.39509	0.726087	19.1931	1.00733e-56	7.54998e-56	118.322
MLK7-AS1	39.6147	5.3356	0.265372	20.1061	6.52718e-90	5.55056e-89	5.23289	0.108992	306.977	9.95079e-69	6.43291e-68	2.97265	-2.97439	11.4276	6.08104e-26	1.61289e-25	47.9605
RP11-215A21.2	18.8144	2.15051	0.106978	20.1023	7.04658e-90	5.9902e-89	2.05813	-0.911005	401.324	2.83571e-89	2.95607e-88	2.12019	-1.65228	20.5991	1.84317e-62	1.76983e-61	131.561
EREG	184.249	4.67429	0.232843	20.0749	1.22391e-89	1.03688e-88	4.67207	2.27959	299.775	3.68826e-67	2.29302e-66	4.32638	-0.889834	14.0368	7.21205e-36	2.57044e-35	70.5704
CD207	54.22	3.88806	0.193697	20.0729	1.27423e-89	1.07877e-88	3.84452	0.530789	329.574	1.19009e-73	8.5482e-73	3.98249	-1.64396	19.8289	2.54483e-59	2.13338e-58	124.361
IGLV2-14	576.782	4.30226	0.214351	20.0711	1.31981e-89	1.1166e-88	4.29453	3.88264	308.612	4.38088e-69	2.85666e-68	4.15107	1.0104	12.6324	1.9598e-30	5.92954e-30	58.0096
PADI3	37.6984	5.84622	0.291366	20.0648	1.49742e-89	1.26557e-88	5.66364	0.352512	262.851	4.10326e-59	2.13423e-58	3.5209	-3.2231	14.2598	9.54164e-37	3.50901e-36	72.6687
IGKV1-9	159.401	4.8513	0.241916	20.0537	1.8752e-89	1.58162e-88	4.81888	2.0424	297.516	1.14514e-66	7.05055e-66	4.75031	-1.13184	15.8022	6.58677e-43	2.96566e-42	86.7141
CYP26A1	25.5786	4.6932	0.234049	20.0523	1.92869e-89	1.62619e-88	4.61929	-0.479709	338.565	1.31013e-75	9.8076e-75	3.23734	-2.97119	14.8325	5.10673e-39	2.02048e-38	77.8647
CTD-2555C10.3	11.8678	4.40357	0.219621	20.0508	1.98632e-89	1.67421e-88	4.32068	-1.4683	409.854	3.94427e-91	4.29562e-90	3.46332	-3.34638	19.6396	1.50892e-58	1.22006e-57	122.597
CTB-134H23.3	19.1782	4.28142	0.213534	20.0502	2.00873e-89	1.69253e-88	3.47229	-0.834776	217.946	2.53716e-49	1.05687e-48	2.96501	-2.96348	13.9773	1.235e-35	4.36592e-35	70.1213
IGHV4-61	101.709	5.276	0.263211	20.0447	2.24379e-89	1.88802e-88	5.22696	1.42331	290.742	3.42695e-65	2.04113e-64	4.73315	-1.96136	16.4225	2.03786e-45	9.95126e-45	92.4928
RP11-452N17.1	120.873	2.34097	0.117051	19.9996	5.55488e-89	4.64422e-88	2.31368	1.61372	381.102	7.16362e-85	6.74042e-84	2.07734	0.728977	14.7201	1.4311e-38	5.57333e-38	76.651
CCL15-CCL14	130.922	3.63753	0.181959	19.9909	6.60269e-89	5.51282e-88	3.5996	1.75768	335.473	6.1757e-75	4.56259e-74	3.83259	-0.252803	15.8786	3.23963e-43	1.47551e-42	87.3797
SULT1A4	360.142	2.45596	0.122873	19.9878	7.03125e-89	5.8667e-88	2.47352	3.19626	367.829	5.55876e-82	4.85849e-81	2.11596	2.20207	13.4944	9.51238e-34	3.17903e-33	65.4496
LDHAP3	11.5682	4.85661	0.242982	19.9875	7.07376e-89	5.90018e-88	4.78807	-1.47625	417.853	7.15738e-93	8.10419e-92	3.90731	-3.47583	21.7591	3.62435e-67	4.21923e-66	142.341
PSAPL1	81.2532	5.40849	0.270608	19.9864	7.22835e-89	6.0271e-88	5.38779	1.10987	288.65	9.78816e-65	5.77453e-64	2.98453	-2.4994	9.55715	2.13283e-19	4.65054e-19	33.0083
CD70	25.3016	4.4403	0.222269	19.9771	8.71594e-89	7.25773e-88	4.35597	-0.515109	343.438	1.13799e-76	8.74842e-76	3.88279	-2.79311	21.3849	1.18608e-65	1.29857e-64	138.875
RP11-211G23.2	17.1886	5.02247	0.251419	19.9765	8.82455e-89	7.34571e-88	4.8676	-1.02521	354.04	5.59029e-79	4.55123e-78	3.41044	-3.33799	15.5363	7.75866e-42	3.37459e-41	84.3227
AC006262.5	24.9221	6.40159	0.320465	19.976	8.91581e-89	7.41918e-88	6.36377	-0.514612	312.112	7.57097e-70	5.02123e-69	3.044	-3.82875	12.5882	2.88544e-30	8.6815e-30	57.8613
HBEGF	683.375	2.32994	0.116653	19.9732	9.41786e-89	7.83434e-88	2.35648	4.12217	367.942	5.25195e-82	4.60004e-81	2.30118	3.22463	20.1561	1.17645e-60	1.04516e-59	127.185
IGLV1-51	286.519	4.15594	0.20809	19.9718	9.68467e-89	8.05359e-88	4.1633	2.8986	312.432	6.44968e-70	4.28672e-69	3.65782	0.20307	12.9341	1.38329e-31	4.34185e-31	60.6934
MYEOV	901.481	3.38013	0.169367	19.9574	1.29349e-88	1.07385e-87	3.41191	4.51302	342.135	2.18697e-76	1.66937e-75	2.91764	2.67776	10.2745	7.75551e-22	1.81985e-21	38.1537
CXCL14	3034.42	3.29903	0.165395	19.9463	1.61281e-88	1.33715e-87	3.30528	6.26903	331.776	3.9439e-74	2.86181e-73	3.11153	4.51424	15.389	3.03244e-41	1.29179e-40	82.5174
SLC24A2	42.9342	3.55026	0.178001	19.9452	1.65149e-88	1.36876e-87	3.50359	0.216022	333.793	1.43479e-74	1.05126e-73	3.25105	-1.66574	16.3924	2.69882e-45	1.31324e-44	92.2049
ALPK2	96.0664	3.39013	0.169985	19.9437	1.70161e-88	1.40983e-87	3.35288	1.32589	339.864	6.82963e-76	5.15774e-75	3.48162	-0.476878	17.6052	3.11863e-50	1.81228e-49	103.484
AC005550.3	60.7788	5.77746	0.289707	19.9424	1.74433e-88	1.44474e-87	5.66769	0.669832	284.677	7.18636e-64	4.15761e-63	3.81915	-2.90895	13.3293	4.1547e-33	1.36336e-32	64.3328
TRAC	375.889	3.03317	0.152215	19.9269	2.3786e-88	1.96418e-87	3.03232	3.25791	343.481	1.1136e-76	8.57151e-76	3.13185	1.78981	18.393	1.88232e-53	1.23324e-52	110.751
SLC13A2	78.2237	5.01903	0.251935	19.9219	2.62728e-88	2.16665e-87	4.342	1.08866	210.568	1.03285e-47	4.14458e-47	2.98339	-2.24095	10.8363	8.23356e-24	2.04878e-23	43.0592
FABP3	123.55	2.57691	0.129361	19.9203	2.71557e-88	2.23872e-87	2.57159	1.68094	356.92	1.31932e-79	1.09019e-78	2.49189	0.576385	17.5141	7.34665e-50	4.21499e-49	102.574
FBLN2	2259.17	2.40492	0.120828	19.9037	3.78065e-88	3.10749e-87	2.42049	5.84165	356.451	1.66869e-79	1.37567e-78	2.18856	4.87838	17.5091	7.70032e-50	4.41484e-49	102.205
RP11-1149O23.2	19.8752	2.08828	0.104933	19.901	3.98938e-88	3.27689e-87	2.05692	-0.809332	370.546	1.42327e-82	1.26489e-81	2.0503	-1.5977	16.2548	9.74553e-45	4.64564e-44	90.9246
HOXB13	40.7511	6.49047	0.326205	19.8969	4.32623e-88	3.54537e-87	6.28233	0.0733604	291.755	2.06107e-65	1.23292e-64	3.21891	-3.47324	11.1189	8.00531e-25	2.05372e-24	45.417
NTF4	20.295	4.92288	0.24744	19.8953	4.47273e-88	3.66421e-87	4.80601	-0.788649	340.759	4.36147e-76	3.30686e-75	3.41227	-3.22402	15.3301	5.22422e-41	2.20692e-40	82.4249
AC098614.2	22.4205	2.0867	0.104884	19.8952	4.47799e-88	3.66731e-87	2.07346	-0.644773	370.712	1.30977e-82	1.16695e-81	2.10469	-1.41876	20.0051	4.85927e-60	4.19835e-59	126.006
RP11-863P13.3	32.2289	4.34422	0.21838	19.893	4.6837e-88	3.83452e-87	4.28444	-0.180133	334.227	1.15381e-74	8.47889e-74	4.91162	-2.47056	27.4308	1.73622e-89	6.92008e-88	193.48
CCDC170	65.6572	2.50319	0.125841	19.8917	4.79868e-88	3.92736e-87	2.49907	0.812062	351.745	1.76653e-78	1.41911e-77	2.69776	-0.298011	19.657	1.28042e-58	1.0397e-57	122.721
IGHV4-59	247.566	4.82302	0.242499	19.8889	5.08071e-88	4.15407e-87	4.79672	2.66673	291.176	2.75622e-65	1.64518e-64	4.89363	-0.683866	15.4979	1.10686e-41	4.78738e-41	83.8867
VAV1	326.818	2.50273	0.125855	19.8858	5.40455e-88	4.41594e-87	2.50266	3.05482	356.674	1.49229e-79	1.23229e-78	2.50025	2.03739	18.2038	1.118e-52	7.13649e-52	108.94
ITIH2	85.3732	3.39335	0.170712	19.8777	6.34805e-88	5.17663e-87	3.7612	1.52257	341.132	3.61728e-76	2.74681e-75	3.0127	-0.619791	13.3189	4.55886e-33	1.4948e-32	64.1369
RP11-10G12.1	6.29434	3.96752	0.19967	19.8704	7.34337e-88	5.97259e-87	3.82272	-2.22854	508.105	1.63839e-112	2.94376e-111	3.38548	-3.64422	29.2466	2.58115e-96	1.63919e-94	209.026
IGLV6-57	124.024	4.68084	0.235647	19.8638	8.37929e-88	6.80622e-87	4.65195	1.69367	295.701	2.84699e-66	1.74037e-65	4.6933	-1.32039	16.5501	6.18455e-46	3.07506e-45	93.6609
PMAIP1	159.637	2.49974	0.125872	19.8593	9.15805e-88	7.43392e-87	2.51789	2.04019	365.521	1.7676e-81	1.51978e-80	2.58241	0.971743	18.7217	8.52062e-55	5.87547e-54	113.883
FAM72D	30.9115	2.69811	0.135924	19.8501	1.10032e-87	8.91425e-87	2.61105	-0.237822	357.007	1.26293e-79	1.04429e-78	2.88943	-1.45475	18.0144	6.64677e-52	4.11176e-51	107.349
RP11-259N19.1	30.8649	2.26167	0.113948	19.8483	1.14088e-87	9.23677e-87	2.21176	-0.249969	373.231	3.70508e-83	3.34559e-82	2.45205	-1.16283	18.8006	4.05664e-55	2.84228e-54	114.713
RP5-907D15.4	23.9361	4.40824	0.222138	19.8446	1.22649e-87	9.92344e-87	4.3308	-0.574006	339.181	9.62067e-76	7.22379e-75	3.8686	-2.83774	21.2968	2.69855e-65	2.9058e-64	138.057
RP3-428L16.2	71.6124	2.57173	0.129714	19.8262	1.77082e-87	1.4281e-86	2.54924	0.908663	353.542	7.17486e-79	5.82981e-78	2.22179	-0.176576	15.7599	9.75841e-43	4.37227e-42	86.2721
TNC	2309.77	3.39748	0.171453	19.8158	2.17682e-87	1.75268e-86	3.4004	5.87299	325.56	8.90825e-73	6.29126e-72	3.38631	3.99597	19.6736	1.09572e-58	8.92941e-58	122.654
KLHL30	37.432	2.73646	0.13816	19.8065	2.61726e-87	2.10185e-86	2.68744	0.0247901	347.756	1.30548e-77	1.02909e-76	2.43569	-1.18114	16.292	6.8894e-45	3.30189e-44	91.2538
ICOS	24.9798	3.51033	0.177281	19.8009	2.92379e-87	2.34423e-86	2.99995	-0.477377	227.095	2.56419e-51	1.11763e-50	3.29164	-2.25248	18.7368	7.39153e-55	5.10824e-54	114.137
IGLV1-47	162.712	4.58684	0.231735	19.7935	3.38789e-87	2.71107e-86	4.56118	2.08273	296.043	2.39857e-66	1.46769e-65	4.60356	-0.908735	15.2821	8.13826e-41	3.41584e-40	81.9095
GPBAR1	156.097	2.22138	0.112318	19.7776	4.64114e-87	3.70799e-86	2.23051	2.01244	358.948	4.77142e-80	3.97714e-79	2.02082	1.17467	15.5968	4.43029e-42	1.9395e-41	84.663
ISLR2	80.9214	2.38412	0.120552	19.7767	4.7276e-87	3.77585e-86	2.37142	1.09118	352.784	1.04937e-78	8.48482e-78	2.33098	0.122046	17.298	5.59065e-49	3.09938e-48	100.576
SPC25	79.0644	2.34991	0.118859	19.7706	5.33343e-87	4.25424e-86	2.33729	1.0406	365.036	2.25481e-81	1.93333e-80	2.37242	0.0815757	19.0955	2.52485e-56	1.86259e-55	117.438
LY9	59.2228	3.13737	0.158812	19.7553	7.22456e-87	5.74793e-86	2.32297	0.737938	148.476	3.73254e-34	1.10297e-33	2.59967	-0.887115	15.0497	6.93636e-40	2.82078e-39	79.7719
SOSTDC1	51.6311	3.95618	0.200731	19.7089	1.80843e-86	1.42647e-85	3.88382	0.46409	312.822	5.30214e-70	3.52969e-69	2.59165	-1.79174	11.0377	1.56914e-24	3.99461e-24	44.6783
S100A3	45.7527	2.58683	0.131277	19.705	1.95179e-86	1.53905e-85	2.5302	0.284653	347.053	1.85712e-77	1.45563e-76	2.6484	-0.849638	19.219	7.8923e-57	5.935e-56	118.63
XKR9	64.352	2.81848	0.143071	19.6998	2.16349e-86	1.70437e-85	2.79577	0.766009	342.058	2.27338e-76	1.73373e-75	2.64874	-0.564868	14.3387	4.6581e-37	1.72944e-36	73.2755
EVI2B	396.333	2.49137	0.126541	19.6883	2.7176e-86	2.13953e-85	2.11507	3.4087	197.022	9.32505e-45	3.50038e-44	2.24419	2.34216	15.1406	3.00257e-40	1.235e-39	80.3588
TNFRSF6B	857.722	4.09992	0.208318	19.6811	3.13295e-86	2.46496e-85	4.09472	4.43633	303.975	4.48575e-68	2.85312e-67	3.73984	1.79849	11.211	3.72356e-25	9.63525e-25	45.8583
LDLRAD1	20.0858	4.1659	0.211709	19.6775	3.36119e-86	2.64286e-85	4.37162	-0.556324	337.819	1.90515e-75	1.42147e-74	3.37597	-2.87177	18.2238	9.26465e-53	5.92914e-52	109.336
NAPSB	293.151	3.08776	0.157066	19.659	4.84299e-86	3.79717e-85	2.54066	2.96254	188.714	6.06794e-43	2.18811e-42	3.14901	1.37536	16.6033	3.76138e-46	1.88608e-45	94.0127
IGKV1-16	119.268	4.83324	0.245863	19.6583	4.913e-86	3.85084e-85	4.8014	1.64522	288.877	8.73257e-65	5.153e-64	4.45359	-1.51828	15.6115	3.86603e-42	1.69667e-41	84.9667
DLX5	20.9702	3.9063	0.198726	19.6567	5.06448e-86	3.96707e-85	3.84844	-0.741851	349.18	6.39425e-78	5.07757e-77	4.06252	-2.69587	24.9016	1.05625e-79	2.31285e-78	171.063
PDPN	834.344	2.42921	0.123637	19.648	6.01152e-86	4.70444e-85	2.44509	4.40477	350.695	2.99118e-78	2.39054e-77	2.11795	3.42488	13.254	8.12537e-33	2.64051e-32	63.1992
FBN2	58.801	3.07421	0.156509	19.6423	6.72784e-86	5.26336e-85	3.05939	0.65464	331.165	5.359e-74	3.87844e-73	3.16311	-0.922398	17.4383	1.49737e-49	8.49079e-49	101.937
CPXM2	743.055	2.29083	0.116654	19.6379	7.34387e-86	5.74168e-85	2.31232	4.25093	348.802	7.72808e-78	6.12304e-77	2.02783	3.38904	15.1096	3.99533e-40	1.63953e-39	79.9719
RP11-734K21.5	11.3052	5.45057	0.277766	19.6229	9.86161e-86	7.69801e-85	5.49544	-1.55036	355.785	2.3297e-79	1.91426e-78	3.30925	-3.87842	17.4006	2.13384e-49	1.20366e-48	101.641
GLIPR2	544.076	2.10239	0.10717	19.6172	1.10203e-85	8.59438e-85	2.10737	3.78887	351.158	2.37179e-78	1.90226e-77	2.00709	3.06939	18.4674	9.34471e-54	6.1943e-53	111.321
TCEAL7	80.1747	2.28573	0.116518	19.6169	1.10888e-85	8.64234e-85	2.25238	1.06051	350.389	3.48717e-78	2.78156e-77	2.04048	0.173379	18.4043	1.69229e-53	1.11079e-52	110.945
TYRP1	20.3976	3.83043	0.195284	19.6147	1.15839e-85	9.0226e-85	3.78729	-0.765071	341.418	3.13357e-76	2.38461e-75	3.03552	-2.68931	16.7812	7.11727e-47	3.65595e-46	95.8505
HLA-DQA1	1460.01	3.45437	0.176146	19.6109	1.24901e-85	9.72233e-85	3.47822	5.23057	320.534	1.1079e-71	7.62901e-71	3.70941	3.25607	17.9814	9.06971e-52	5.58003e-51	106.809
ST8SIA4	240.877	2.23341	0.113899	19.6087	1.30384e-85	1.01385e-84	2.24782	2.63536	347.858	1.24061e-77	9.78574e-77	2.15951	1.79684	18.1807	1.38917e-52	8.82436e-52	108.734
CFAP45	48.4059	2.87652	0.14674	19.6029	1.46075e-85	1.13492e-84	2.85711	0.383892	338.883	1.11712e-75	8.37533e-75	2.27381	-0.961398	15.4943	1.14497e-41	4.94707e-41	83.8608
IL17REL	10.9929	5.10191	0.260375	19.5945	1.72304e-85	1.33619e-84	3.41132	-1.49921	141.483	1.26172e-32	3.59946e-32	3.03493	-3.77144	15.6668	2.31469e-42	1.02325e-41	85.5334
GEM	1066.06	2.7178	0.138715	19.5926	1.78724e-85	1.38554e-84	2.74351	4.76913	339.029	1.03808e-75	7.78985e-75	2.98517	3.54496	21.4139	9.04659e-66	9.97495e-65	138.953
HLA-DQB1	1903.44	3.35526	0.171277	19.5897	1.8936e-85	1.46708e-84	3.38079	5.60429	324.289	1.68514e-72	1.1837e-71	3.04964	3.72	13.8226	4.99015e-35	1.73325e-34	68.2982
ELFN1-AS1	10.0434	5.57107	0.284463	19.5845	2.0949e-85	1.62203e-84	6.99759	-0.770531	350.645	3.06668e-78	2.45009e-77	3.02316	-4.02663	14.5417	7.31359e-38	2.79778e-37	75.2378
RP1-34M23.5	12.5331	5.16559	0.263806	19.581	2.24701e-85	1.73872e-84	4.82003	-1.38639	378.825	2.24301e-84	2.09384e-83	3.71228	-3.49053	18.7502	6.51596e-55	4.51823e-54	114.27
GSDMC	26.7682	3.80883	0.194575	19.5751	2.52077e-85	1.94812e-84	2.7076	-0.329563	135.771	2.2392e-31	6.22359e-31	3.20142	-2.40066	17.353	3.33779e-49	1.86795e-48	101.18
RP11-11N9.4	17.2343	3.27834	0.167714	19.5472	4.35482e-85	3.35301e-84	3.20451	-1.02168	361.154	1.5785e-80	1.32912e-79	2.87713	-2.5102	18.1898	1.27558e-52	8.11739e-52	109.014
HLA-DQB2	173.689	3.81035	0.194935	19.5468	4.39519e-85	3.38304e-84	3.77569	2.16152	307.925	6.18415e-69	4.01251e-68	4.82472	-0.14377	23.2322	4.34043e-73	6.6984e-72	155.932
MX1	2301.03	2.4156	0.123603	19.5432	4.71059e-85	3.62132e-84	2.43042	5.86203	346.849	2.05731e-77	1.60948e-76	2.11621	4.87803	18.3701	2.33594e-53	1.52281e-52	110.292
RP11-752L20.3	32.0416	2.74334	0.140519	19.5228	7.02315e-85	5.37914e-84	2.70903	-0.175912	343.387	1.16755e-76	8.97013e-76	2.98453	-1.45985	20.4831	5.47223e-62	5.15482e-61	130.475
SLC2A1-AS1	17.648	2.49496	0.12783	19.5178	7.74849e-85	5.92738e-84	2.44851	-0.984018	362.823	6.838e-81	5.80296e-80	2.5569	-2.03186	19.336	2.62455e-57	2.01641e-56	119.749
RASSF10	26.0879	4.09987	0.210125	19.5116	8.75145e-85	6.68638e-84	4.00948	-0.464997	321.416	7.12104e-72	4.92679e-71	3.33927	-2.61458	14.695	1.8009e-38	6.99706e-38	76.6019
RP11-284F21.9	96.4159	3.81456	0.195545	19.5073	9.5139e-85	7.25495e-84	3.77672	1.31494	309.957	2.23125e-69	1.46688e-68	3.49824	-0.929992	14.5578	6.3127e-38	2.42086e-37	75.2856
LINC01116	47.8599	2.33819	0.119888	19.5031	1.03372e-84	7.87614e-84	2.29429	0.354743	343.878	9.12745e-77	7.04081e-76	2.07283	-0.583583	17.1189	3.00263e-48	1.61907e-47	98.9356
DRD1	35.2706	3.77228	0.193422	19.5028	1.03911e-84	7.9148e-84	3.71543	-0.0491605	318.246	3.49099e-71	2.37819e-70	2.99443	-2.103	14.5624	6.05685e-38	2.32382e-37	75.3786
GPSM3	634.423	2.20672	0.113171	19.4989	1.12064e-84	8.53312e-84	2.20895	4.00231	350.781	2.86427e-78	2.29059e-77	2.205	3.20564	21.4501	6.45155e-66	7.14533e-65	139.284
ETV7	159.585	2.2832	0.117177	19.4849	1.47329e-84	1.11944e-83	2.2782	2.03238	350.342	3.57071e-78	2.84728e-77	2.36894	1.11589	18.8215	3.33129e-55	2.34664e-54	114.808
HOXA-AS3	17.8386	4.73235	0.242949	19.4788	1.66082e-84	1.26116e-83	4.45938	-0.975651	322.221	4.75389e-72	3.30285e-71	3.06595	-3.24621	15.2896	7.59966e-41	3.19409e-40	82.0546
RP11-689K5.3	13.6858	3.34691	0.171864	19.4741	1.81969e-84	1.38095e-83	3.27929	-1.29082	361.437	1.3698e-80	1.15535e-79	2.80116	-2.7912	16.3843	2.91259e-45	1.41587e-44	92.1604
AC018816.3	9.25221	2.90133	0.148996	19.4726	1.87578e-84	1.42309e-83	2.78692	-1.77457	400.273	4.80329e-89	4.97582e-88	2.72072	-2.9483	20.5513	2.8868e-62	2.75277e-61	131.115
RIBC2	19.979	2.74735	0.141181	19.4598	2.40702e-84	1.82277e-83	2.67867	-0.813348	346.121	2.96438e-77	2.30965e-76	2.58317	-2.02119	17.534	6.09042e-50	3.50072e-49	102.865
TGM2	11562.5	2.50247	0.128665	19.4495	2.94161e-84	2.22421e-83	2.53501	8.20706	333.592	1.58657e-74	1.1611e-73	2.56894	7.18103	17.7611	7.20647e-51	4.27176e-50	104.601
CXCR3	63.7066	3.03159	0.155884	19.4477	3.04797e-84	2.30393e-83	2.99633	0.749903	330.528	7.37566e-74	5.32089e-73	3.477	-0.784377	21.5354	2.9139e-66	3.27102e-65	140.271
THSD7B	45.6806	3.48379	0.179208	19.4399	3.55083e-84	2.68077e-83	3.43513	0.319805	315.461	1.41107e-70	9.49801e-70	3.80084	-1.56692	20.3447	2.00372e-61	1.8346e-60	129.184
GBP1	743.924	2.18173	0.112235	19.4389	3.62101e-84	2.73127e-83	2.2112	4.2525	346.928	1.97706e-77	1.54817e-76	2.04488	3.44733	18.1725	1.50037e-52	9.52101e-52	108.521
AKR1C4	30.3271	4.67062	0.240347	19.4329	4.06888e-84	3.0631e-83	4.58693	-0.24567	300.21	2.96568e-67	1.84795e-66	3.29121	-2.86325	15.0092	1.00707e-39	4.07604e-39	79.4764
BTNL8	192.884	3.7444	0.192807	19.4204	5.18444e-84	3.89633e-83	3.72148	2.30854	306.017	1.61016e-68	1.0358e-67	2.15407	0.0573099	7.7655	8.9222e-14	1.63503e-13	20.0398
PTGIS	1434.27	2.76581	0.142418	19.4203	5.19422e-84	3.9025e-83	2.79326	5.2008	330.216	8.62355e-74	6.21391e-73	2.18832	3.91664	13.2836	6.24186e-33	2.03668e-32	63.4253
MIR31HG	15.2984	5.0949	0.262463	19.4119	6.12337e-84	4.59642e-83	4.97318	-1.13373	336.1	4.51045e-75	3.34026e-74	3.47639	-3.47974	16.4693	1.31573e-45	6.47206e-45	92.9585
C10orf55	19.2838	2.80323	0.144419	19.4103	6.3112e-84	4.73454e-83	2.7248	-0.847868	346.995	1.91189e-77	1.49761e-76	2.6717	-2.0668	17.8384	3.48017e-51	2.08987e-50	105.716
RP11-719K4.3	64.8984	3.74598	0.193067	19.4025	7.34804e-84	5.50073e-83	3.6629	0.779289	318.262	3.46275e-71	2.36024e-70	3.16761	-1.24701	12.5023	6.10546e-30	1.82217e-29	57.0154
FLVCR2	141.433	2.20285	0.113568	19.3968	8.21223e-84	6.13841e-83	2.20775	1.87827	344.637	6.23755e-77	4.82657e-76	2.19474	1.01668	17.5585	4.83744e-50	2.78891e-49	102.957
DLEU7	13.8495	2.72553	0.14054	19.3933	8.79365e-84	6.56905e-83	2.69164	-1.25543	365.72	1.5997e-81	1.37732e-80	3.08784	-2.50052	23.4699	4.88859e-74	7.92354e-73	158.088
HIST1H4J	22.346	2.82979	0.145981	19.3846	1.04161e-83	7.76934e-83	2.71761	-0.68443	342.911	1.48207e-76	1.13479e-75	3.11877	-1.97988	20.6543	1.09963e-62	1.06535e-61	132.077
CTSW	83.5504	2.65615	0.13714	19.3682	1.43293e-83	1.06626e-82	2.12381	1.20362	167.231	2.97883e-38	9.66135e-38	2.57384	-0.0718547	15.5165	9.31889e-42	4.03976e-41	84.0196
HLA-DPB2	18.5508	4.14465	0.214057	19.3624	1.60308e-83	1.19144e-82	4.09057	-0.883152	343.469	1.12034e-76	8.62074e-76	4.17234	-2.92278	24.7713	3.43278e-79	7.32927e-78	169.886
GDNF	19.23	3.15469	0.162936	19.3615	1.62994e-83	1.21068e-82	3.09914	-0.853888	343.022	1.40193e-76	1.07508e-75	2.70184	-2.34206	16.7743	7.59028e-47	3.89571e-46	95.7791
RP11-832A4.7	24.3802	3.12562	0.161504	19.3532	1.91578e-83	1.42172e-82	3.07017	-0.544611	333.413	1.73543e-74	1.26855e-73	2.53864	-2.02319	14.3074	6.18787e-37	2.28715e-36	73.0644
RP11-10A14.5	17.6992	4.16472	0.215224	19.3507	2.01199e-83	1.49267e-82	4.07637	-0.956803	332.328	2.99044e-74	2.17567e-73	3.11648	-3.02315	17.046	5.94887e-48	3.17806e-47	98.3247
IGKV2-28	546.017	4.6179	0.238664	19.349	2.0777e-83	1.54096e-82	4.62382	3.81941	279.362	1.03429e-62	5.84622e-62	4.81974	0.497633	13.3318	4.06318e-33	1.33386e-32	64.197
GPNMB	4030.85	2.56951	0.132843	19.3425	2.35811e-83	1.74684e-82	2.58555	6.68723	327.44	3.47087e-73	2.46949e-72	2.52138	5.54842	19.6215	1.78901e-58	1.44183e-57	122.058
RP5-1185I7.1	7.42793	5.14203	0.265971	19.333	2.83328e-83	2.09822e-82	5.53684	-1.98513	396.326	3.47288e-88	3.51693e-87	3.21584	-4.03657	17.6824	1.50966e-50	8.86619e-50	104.277
RP11-492E3.2	29.9864	3.7841	0.195813	19.325	3.30841e-83	2.44716e-82	3.70407	-0.28967	318.364	3.29101e-71	2.24441e-70	3.73356	-2.28809	19.8692	1.74196e-59	1.46825e-58	124.744
PF4	14.3599	4.12684	0.213626	19.3181	3.78542e-83	2.79666e-82	3.40177	-1.26895	232.424	1.76516e-52	7.90741e-52	3.16247	-3.1542	18.5216	5.61216e-54	3.74813e-53	112.128
CTD-2357A8.3	6.89317	4.49376	0.232745	19.3077	4.62824e-83	3.41527e-82	4.3759	-2.11101	380.655	8.96188e-85	8.41014e-84	3.00821	-3.86384	17.9676	1.03221e-51	6.33488e-51	106.944
HLA-DOB	101.531	3.15449	0.163508	19.2926	6.20361e-83	4.56691e-82	2.1193	1.51441	112.158	3.29963e-26	8.10898e-26	2.73086	-0.207408	15.1413	2.98233e-40	1.22708e-39	80.5762
KCNS1	59.4489	3.19955	0.165883	19.288	6.77619e-83	4.98399e-82	3.15565	0.67226	314.25	2.59092e-70	1.7355e-69	3.2534	-1.00872	16.879	2.84744e-47	1.48602e-46	96.7133
SLAMF8	416.169	2.30748	0.119654	19.2845	7.24707e-83	5.32087e-82	2.32002	3.41566	335.713	5.47547e-75	4.04767e-74	2.19253	2.52014	17.0729	4.62592e-48	2.47877e-47	98.2842
CD180	124.774	2.95482	0.153236	19.2829	7.48351e-83	5.49285e-82	2.23196	1.79127	143.375	4.86734e-33	1.40308e-32	3.1162	0.222453	17.6726	1.65548e-50	9.71344e-50	104.083
ADAMDEC1	85.5129	3.9842	0.206637	19.2811	7.73543e-83	5.67608e-82	3.62403	1.19981	233.518	1.01915e-52	4.59034e-52	4.10638	-1.25125	18.9475	1.01649e-55	7.3161e-55	116.095
PIF1	55.6465	2.16225	0.112217	19.2684	9.88974e-83	7.24402e-82	2.11623	0.54772	345.05	5.06991e-77	3.93409e-76	2.01696	-0.266446	17.4778	1.03344e-49	5.90051e-49	102.278
PNPLA3	25.4896	3.19524	0.165921	19.2576	1.21979e-82	8.92944e-82	3.14579	-0.485131	325.212	1.06107e-72	7.48296e-72	3.46838	-2.0787	20.1894	8.60313e-61	7.68433e-60	127.737
BRINP1	25.8737	3.25688	0.169144	19.2551	1.27981e-82	9.36328e-82	3.75555	0.00209007	331.4	4.76356e-74	3.45456e-73	2.89961	-2.05585	18.2034	1.1218e-52	7.15895e-52	109.134
MZB1	232.429	3.67262	0.19084	19.2445	1.56851e-82	1.14653e-81	3.64817	2.56533	301.064	1.93173e-67	1.20914e-66	3.85761	0.340933	16.0463	6.80539e-44	3.15446e-43	88.9042
CD1C	79.5501	3.567	0.185353	19.2444	1.57413e-82	1.1503e-81	2.95563	1.11456	184.561	4.89436e-42	1.72999e-41	3.93339	-0.952924	18.7754	5.14199e-55	3.5805e-54	114.472
KRT81	73.6218	4.03251	0.209639	19.2355	1.86748e-82	1.36427e-81	4.51364	1.48786	314.751	2.01539e-70	1.35291e-69	2.27147	-1.44352	10.0587	4.30163e-21	9.8564e-21	36.8093
ST6GAL2	87.3235	3.20668	0.166721	19.2338	1.92824e-82	1.40782e-81	3.18939	1.20694	315.212	1.59888e-70	1.07477e-69	3.50235	-0.533196	18.4442	1.16228e-53	7.67978e-53	111.352
GJB6	61.8989	4.49432	0.233685	19.2324	1.98278e-82	1.44679e-81	4.42823	0.702612	285.897	3.89606e-64	2.26724e-63	3.13157	-2.19102	12.4328	1.1188e-29	3.31513e-29	56.4629
DRC1	21.434	4.92951	0.256335	19.2308	2.0458e-82	1.4919e-81	4.82516	-0.706539	310.765	1.48817e-69	9.80698e-69	2.82306	-3.37745	14.167	2.21588e-36	8.04657e-36	71.8394
GAL3ST4	232.142	2.14905	0.11178	19.2257	2.25475e-82	1.6438e-81	2.15018	2.57736	331.906	3.69488e-74	2.6819e-73	2.18078	1.77152	19.3711	1.88514e-57	1.45871e-56	119.921
SLC9A4	70.9187	5.61725	0.292468	19.2064	3.27189e-82	2.37626e-81	5.57136	0.914908	266.995	5.12712e-60	2.72149e-59	3.94563	-2.74414	12.7106	9.8773e-31	3.01714e-30	58.8921
TMEM156	40.4941	2.75865	0.143643	19.2048	3.37192e-82	2.44819e-81	2.31289	0.176735	198.102	5.42017e-45	2.04417e-44	2.49429	-1.14077	16.7016	1.49893e-46	7.59592e-46	95.0638
RAB33A	24.6776	2.65723	0.138363	19.2048	3.37653e-82	2.45082e-81	2.60706	-0.536177	344.537	6.55775e-77	5.0696e-76	2.95341	-1.74921	23.2458	3.83278e-73	5.9371e-72	156.052
RP11-426C22.5	23.8322	2.51802	0.131121	19.2038	3.43702e-82	2.494e-81	2.47811	-0.58694	347.872	1.23168e-77	9.71844e-77	2.90448	-1.71902	21.6617	8.9739e-67	1.02972e-65	141.449
CCL5	532.298	2.74885	0.143156	19.2017	3.58077e-82	2.59679e-81	2.75759	3.75816	325.896	7.52778e-73	5.3239e-72	2.85944	2.49959	18.6163	2.30083e-54	1.56013e-53	112.792
CYP2B6	41.7796	4.69843	0.244743	19.1974	3.89102e-82	2.81932e-81	4.63868	0.194982	285.764	4.16476e-64	2.42247e-63	3.46832	-2.60364	14.1061	3.84986e-36	1.38846e-35	71.2673
CHIT1	324.072	4.31137	0.224702	19.187	4.74927e-82	3.43616e-81	3.09366	3.14884	129.607	4.99588e-30	1.34343e-29	4.09385	0.0195916	13.0643	4.37524e-32	1.39481e-31	61.8532
APELA	16.0567	5.79664	0.302219	19.1802	5.41411e-82	3.91149e-81	5.85634	-1.07223	343.728	9.84036e-77	7.58603e-76	3.62791	-3.74936	17.8358	3.56778e-51	2.14041e-50	105.709
IGHV3-74	121.062	4.16724	0.217512	19.1586	8.20386e-82	5.90635e-81	4.15849	1.67661	287.906	1.42151e-64	8.35645e-64	3.89043	-1.00496	14.1513	2.55482e-36	9.25708e-36	71.6075
CCL13	62.3726	3.42619	0.178849	19.1569	8.47268e-82	6.09812e-81	3.39491	0.736634	308.31	5.09768e-69	3.3171e-68	3.17579	-1.172	14.84	4.76563e-39	1.88944e-38	77.868
AC005255.3	4.11234	3.482	0.181899	19.1425	1.11808e-81	8.02862e-81	3.33439	-2.627	466.437	1.91059e-103	2.75026e-102	2.76088	-3.84566	21.9457	6.39081e-68	7.71089e-67	144.058
CTA-363E6.2	15.6583	4.88221	0.255097	19.1386	1.20424e-81	8.64232e-81	4.77569	-1.11615	333.876	1.37615e-74	1.0086e-73	3.61766	-3.40574	17.1832	1.64235e-48	8.94719e-48	99.6071
BTBD16	32.3631	3.19848	0.167247	19.1243	1.58375e-81	1.13463e-80	3.13469	-0.188506	321.103	8.33123e-72	5.75126e-71	2.65345	-1.77801	15.1886	1.92926e-40	7.99092e-40	81.0852
VSNL1	75.8705	2.39805	0.125448	19.1159	1.8625e-81	1.33356e-80	2.37617	0.990053	334.221	1.15716e-74	8.50104e-74	2.16455	-0.0111633	14.8188	5.78783e-39	2.28595e-38	77.609
PI15	190.671	2.91404	0.152499	19.1086	2.14246e-81	1.53356e-80	2.91297	2.30057	318.54	3.01209e-71	2.05645e-70	2.79441	0.843055	14.7407	1.18492e-38	4.63279e-38	76.8386
HAS2-AS1	7.48701	3.46155	0.181176	19.106	2.25161e-81	1.60984e-80	3.35813	-1.99284	408.528	7.66746e-91	8.27426e-90	3.12045	-3.40156	22.4355	6.78222e-70	9.01067e-69	148.585
ULBP3	16.6504	2.1847	0.114356	19.1044	2.32021e-81	1.65793e-80	2.15959	-1.01792	342.631	1.70573e-76	1.30443e-75	2.04168	-1.88464	16.6328	2.85469e-46	1.43608e-45	94.4484
EGR2	391.924	3.03196	0.15877	19.0966	2.69522e-81	1.92314e-80	3.0451	3.33464	315.238	1.57827e-70	1.0612e-69	3.63262	1.75356	20.4533	7.23013e-62	6.77221e-61	130.1
CD86	238.69	2.6255	0.137486	19.0966	2.69669e-81	1.92363e-80	2.62958	2.62182	325.095	1.12477e-72	7.92766e-72	2.87972	1.42629	19.6822	1.01019e-58	8.24315e-58	122.878
CTC-548K16.1	4.94518	4.76851	0.249941	19.0785	3.80828e-81	2.71267e-80	5.48738	-2.43282	414.931	3.09534e-92	3.44975e-91	2.77941	-4.28467	16.8054	5.67566e-47	2.92633e-46	96.0932
ZIC2	25.7728	4.86241	0.254954	19.0717	4.34243e-81	3.08782e-80	4.7515	-0.471817	290.851	3.24475e-65	1.93353e-64	2.98052	-3.11842	11.7814	3.0481e-27	8.3948e-27	50.9347
CLDN11	239.376	2.34161	0.122841	19.062	5.22331e-81	3.70784e-80	2.35804	2.6268	326.633	5.20147e-73	3.69022e-72	2.19998	1.67739	15.5162	9.34629e-42	4.05093e-41	83.8765
IGHV1-46	72.5131	4.60753	0.241937	19.0443	7.32047e-81	5.18467e-80	4.58581	0.955306	277.871	2.18509e-62	1.227e-61	4.25217	-1.97083	15.7827	7.89217e-43	3.54762e-42	86.5633
GAP43	88.6017	2.78823	0.146531	19.0282	9.96045e-81	7.04036e-80	2.73326	1.19352	316.781	7.27823e-71	4.93112e-70	2.27729	-0.096906	14.3475	4.29927e-37	1.60005e-36	73.3259
BTLA	27.9187	3.65479	0.192126	19.0229	1.10208e-80	7.77659e-80	2.02263	-0.20212	73.1466	1.20369e-17	2.38959e-17	2.79489	-2.29026	15.2105	1.5768e-40	6.55838e-40	81.3047
XIRP1	81.7463	3.45865	0.181822	19.0222	1.11673e-80	7.87547e-80	2.74619	1.16167	166.767	3.76137e-38	1.21724e-37	2.72458	-0.839828	12.421	1.23948e-29	3.6666e-29	56.2873
RP11-982M15.6	5.83158	3.70358	0.194713	19.0208	1.14805e-80	8.09407e-80	3.62397	-2.27451	425.773	1.35181e-94	1.59462e-93	2.91439	-3.69142	20.8056	2.66404e-63	2.64603e-62	133.481
MUC5AC	8585.65	5.81881	0.306065	19.0117	1.36468e-80	9.60495e-80	5.22784	7.78062	192.639	8.44089e-44	3.10282e-43	7.61399	2.32452	14.0595	5.8743e-36	2.10362e-35	70.6891
CYP27C1	47.0369	2.93479	0.154409	19.0066	1.50401e-80	1.05826e-79	2.89631	0.338359	314.55	2.22842e-70	1.4947e-69	2.30024	-1.09539	12.3489	2.31911e-29	6.81166e-29	55.6799
RP11-102K13.5	65.6536	3.3382	0.17573	18.9962	1.83227e-80	1.28704e-79	3.31583	0.805147	306.141	1.51328e-68	9.73733e-68	2.31255	-1.01804	10.728	1.99614e-23	4.9129e-23	42.1072
CENPVP1	14.0218	5.32936	0.280588	18.9935	1.92891e-80	1.35416e-79	5.17408	-1.27618	332.962	2.17655e-74	1.58678e-73	3.49022	-3.66916	17.351	3.4001e-49	1.90239e-48	101.176
MROH3P	12.5471	4.58409	0.24142	18.988	2.14247e-80	1.50324e-79	4.44021	-1.40348	337.142	2.67455e-75	1.98659e-74	3.07002	-3.47365	15.4818	1.28512e-41	5.54294e-41	83.825
GUCY2C	60.032	4.03568	0.212703	18.9733	2.83462e-80	1.98495e-79	5.49687	2.0929	350.832	2.79277e-78	2.23629e-77	2.16053	-1.72983	8.8052	5.97365e-17	1.20742e-16	27.3914
IRF4	85.6963	2.95664	0.155853	18.9707	2.97929e-80	2.08508e-79	2.32499	1.244	161.004	6.8277e-37	2.15479e-36	2.37594	-0.286913	13.0479	5.06142e-32	1.60963e-31	61.72
CD5	145.686	2.59814	0.137188	18.9385	5.49871e-80	3.8289e-79	2.58187	1.90675	319.498	1.8632e-71	1.27698e-70	2.28232	0.754205	14.9446	1.82405e-39	7.32777e-39	78.7029
HSPB1P1	9.23354	3.8437	0.202963	18.9379	5.55323e-80	3.86577e-79	3.23168	-1.72048	251.5	1.22317e-56	6.01081e-56	3.58596	-3.32564	25.2609	4.12507e-81	9.86798e-80	174.267
CCK	61.7826	4.4218	0.233712	18.9199	7.82261e-80	5.43338e-79	4.29547	0.665048	273.865	1.6311e-61	8.97446e-61	2.5852	-2.11487	9.50428	3.19785e-19	6.93078e-19	32.586
TNN	48.1919	2.78701	0.147345	18.9149	8.60354e-80	5.97078e-79	2.77843	0.387346	317.824	4.31512e-71	2.93237e-70	2.64544	-0.965544	17.1424	2.40976e-48	1.30477e-47	99.1707
IGHV3-15	160.793	4.48356	0.237045	18.9144	8.68741e-80	6.0273e-79	4.4574	2.05485	271.307	5.89049e-61	3.20339e-60	4.62023	-0.989153	15.5862	4.8883e-42	2.13625e-41	84.7126
UPK3A	12.4965	4.83389	0.255647	18.9085	9.70702e-80	6.73094e-79	4.68101	-1.43902	343.467	1.12144e-76	8.62653e-76	3.24628	-3.61798	18.9001	1.58833e-55	1.13105e-54	115.675
RP5-875H18.9	8.32339	4.56765	0.241617	18.9045	1.0464e-79	7.2498e-79	4.50121	-1.89019	366.678	9.8962e-82	8.58304e-81	2.95569	-3.79348	17.4646	1.16914e-49	6.65541e-49	102.24
UCN2	18.5026	4.20983	0.222694	18.9041	1.05486e-79	7.30637e-79	4.11987	-0.911607	320.341	1.22098e-71	8.40301e-71	3.69298	-3.01797	19.942	8.79064e-60	7.51137e-59	125.426
VPREB3	40.9918	4.29541	0.227268	18.9002	1.13596e-79	7.85931e-79	2.40413	0.511349	72.2399	1.9056e-17	3.76285e-17	2.37794	-2.4226	10.2069	1.3294e-21	3.09491e-21	38.0317
IGF2BP1	24.5406	4.82239	0.255227	18.8945	1.26637e-79	8.75179e-79	4.72958	-0.536066	293.383	9.10949e-66	5.50092e-65	3.05902	-3.22339	13.6143	3.24922e-34	1.1013e-33	66.8782
CGB7	37.9877	3.45692	0.182966	18.8938	1.28319e-79	8.86557e-79	3.38843	0.0414805	303.69	5.17481e-68	3.2855e-67	2.48353	-1.78508	11.7598	3.66404e-27	1.00688e-26	50.6915
HOXA11-AS	16.151	5.19768	0.275133	18.8915	1.33997e-79	9.25533e-79	4.99506	-1.11576	303.413	5.94593e-68	3.77122e-67	2.82617	-3.63942	12.5297	4.80923e-30	1.44016e-29	57.3521
SRGN	1885.52	2.20395	0.116667	18.8909	1.35426e-79	9.35141e-79	2.22807	5.583	329.607	1.17031e-73	8.40853e-73	2.02044	4.72424	18.0814	3.53655e-52	2.21143e-51	107.581
ITGB3	137.175	2.41158	0.127712	18.8829	1.57604e-79	1.08738e-78	2.44055	1.84682	326.948	4.44173e-73	3.15573e-72	2.33626	0.788937	16.0456	6.84966e-44	3.17439e-43	88.8548
FAM83A-AS1	16.8455	5.62873	0.298997	18.8254	4.67659e-79	3.20609e-78	5.46944	-1.03991	289.186	7.48146e-65	4.42525e-64	3.28978	-3.73819	14.5332	7.9066e-38	3.02091e-37	75.1546
KRT15	364.766	2.8647	0.152234	18.8177	5.41214e-79	3.7083e-78	2.87423	3.20918	313.94	3.02671e-70	2.02468e-69	2.31317	1.79571	11.0562	1.3464e-24	3.43424e-24	44.5337
EVI2A	242.274	2.54997	0.135554	18.8115	6.08137e-79	4.15996e-78	2.55209	2.64428	316.183	9.82756e-71	6.633e-70	2.66426	1.50346	17.8673	2.6526e-51	1.59871e-50	105.824
RP11-93K22.13	3.59422	3.9923	0.212609	18.7777	1.15058e-78	7.82525e-78	4.24436	-2.76476	402.73	1.4017e-89	1.46859e-88	2.55196	-4.21608	17.584	3.80939e-50	2.20492e-49	103.358
MXRA5	5792.54	2.56466	0.136587	18.7767	1.17088e-78	7.96117e-78	2.60966	7.20902	321.488	6.86856e-72	4.75343e-71	2.53235	6.03045	16.5901	4.25379e-46	2.12827e-45	93.596
RP11-187E13.1	4.07976	4.09543	0.218153	18.7732	1.25169e-78	8.50828e-78	4.25973	-2.64753	398.649	1.08387e-88	1.11259e-87	2.66396	-4.1564	18.8279	3.13506e-55	2.21155e-54	114.999
SLAMF9	10.8889	4.20427	0.224031	18.7665	1.42003e-78	9.63673e-78	3.25033	-1.52307	192.396	9.53661e-44	3.50042e-43	2.89905	-3.44677	16.5558	5.86388e-46	2.91796e-45	93.7643
LGALS9B	35.32	5.15776	0.274974	18.7573	1.68889e-78	1.14456e-77	5.0152	-0.0662615	276.554	4.23227e-62	2.36479e-61	3.90296	-2.98354	16.4005	2.50278e-45	1.21904e-44	92.3106
CDH6	336.727	2.42066	0.129092	18.7514	1.88432e-78	1.27596e-77	2.43426	3.11906	312.951	4.96986e-70	3.31293e-69	2.50811	2.07879	18.8145	3.55636e-55	2.50023e-54	114.676
GZMH	38.4592	2.96842	0.158415	18.7382	2.41749e-78	1.63388e-77	2.4832	0.110705	188.032	8.54753e-43	3.0711e-42	3.05602	-1.42365	18.4117	1.57857e-53	1.03724e-52	111.073
ACTG2	1210.83	3.4219	0.182631	18.7367	2.48685e-78	1.67984e-77	4.48163	5.91277	337.647	2.07689e-75	1.54683e-74	2.00672	2.96481	8.66156	1.69767e-16	3.38348e-16	25.9007
IGHV2-26	33.4386	5.4882	0.292924	18.7359	2.52415e-78	1.70457e-77	6.17735	0.60879	277.823	2.23895e-62	1.25639e-61	3.54884	-3.25195	13.8946	2.60792e-35	9.13746e-35	69.3819
LTB	368.074	3.28613	0.175425	18.7324	2.69741e-78	1.82108e-77	2.45088	3.30387	139.062	4.26948e-32	1.20431e-31	3.21654	1.38557	15.3086	6.37375e-41	2.68704e-40	82.0115
E2F2	55.4293	2.77959	0.148407	18.7295	2.84316e-78	1.91844e-77	2.74443	0.548569	310.946	1.35881e-69	8.95924e-69	3.22802	-0.84457	20.7778	3.45827e-63	3.4253e-62	133.218
LEF1-AS1	11.3605	2.74072	0.146335	18.729	2.87076e-78	1.93653e-77	2.68817	-1.52688	358.517	5.92158e-80	4.92922e-79	2.95618	-2.73293	22.8933	9.85275e-72	1.41664e-70	152.804
HPGDS	69.4936	2.35422	0.125771	18.7183	3.50928e-78	2.36405e-77	2.34229	0.884411	316.873	6.95185e-71	4.71128e-70	2.43481	-0.132741	18.4208	1.44863e-53	9.53884e-53	111.115
GZMA	104.04	2.83819	0.151664	18.7137	3.82907e-78	2.57808e-77	2.81367	1.43745	307.138	9.17523e-69	5.93771e-68	3.22436	0.013084	20.9248	8.73339e-64	8.855e-63	134.571
PKP1	342.938	3.34149	0.178594	18.71	4.10559e-78	2.76197e-77	3.32331	3.11181	293.195	1.00074e-65	6.03288e-65	2.3807	1.18976	10.169	1.7967e-21	4.16639e-21	37.4553
IGKV1-27	145.691	4.76246	0.254541	18.71	4.10664e-78	2.76197e-77	5.08617	2.25751	270.002	1.13357e-60	6.12308e-60	4.41635	-1.39465	14.2309	1.24097e-36	4.54424e-36	72.3453
RP11-547D24.1	9.29012	4.09619	0.219043	18.7004	4.91527e-78	3.29868e-77	3.9462	-1.7523	352.056	1.51144e-78	1.21615e-77	3.13705	-3.513	20.3884	1.33014e-61	1.22829e-60	129.594
IGHV1-69	53.9247	6.31619	0.337796	18.6982	5.11902e-78	3.43356e-77	7.01783	1.72794	226.384	3.66423e-51	1.5904e-50	4.09474	-3.09028	13.2044	1.26324e-32	4.08378e-32	63.2301
AK4P1	14.8255	3.02568	0.161874	18.6916	5.79634e-78	3.88472e-77	2.8727	-1.14738	313.611	3.57034e-70	2.38512e-69	2.86744	-2.52486	17.1628	1.98894e-48	1.07951e-47	99.407
NPY4R	19.9085	3.73516	0.199901	18.6851	6.54696e-78	4.38424e-77	3.65635	-0.790308	305.766	1.82676e-68	1.17301e-67	2.8223	-2.69406	14.7793	8.3188e-39	3.2679e-38	77.3737
ADH6	90.528	3.09664	0.165835	18.6731	8.20055e-78	5.47976e-77	3.4343	1.56007	315.027	1.75411e-70	1.17847e-69	2.22634	-0.379885	11.5866	1.59106e-26	4.29525e-26	49.1443
IGHV1-24	64.8223	5.14545	0.275752	18.6597	1.05318e-77	7.0224e-77	4.31611	0.826114	170.916	4.6687e-39	1.54058e-38	4.561	-2.46827	16.4517	1.55105e-45	7.60549e-45	92.7756
DACT1	482.228	2.12528	0.113943	18.6521	1.21341e-77	8.07777e-77	2.14627	3.62924	316.898	6.86431e-71	4.65322e-70	2.14623	2.82515	17.9236	1.56263e-51	9.50557e-51	106.235
IGLV3-1	240.507	4.88763	0.26206	18.6508	1.24448e-77	8.28019e-77	4.87219	2.63454	258.81	3.11825e-58	1.59254e-57	5.36388	-0.860748	16.1132	3.6494e-44	1.70592e-43	89.5858
PRND	25.8645	3.81866	0.20531	18.5995	3.24365e-77	2.14782e-76	3.77188	-0.459523	298.295	7.74854e-67	4.78974e-66	3.79147	-2.53555	19.7052	8.13833e-59	6.6716e-58	123.21
HSD11B1	175.348	2.45413	0.131997	18.5923	3.70887e-77	2.45259e-76	2.46244	2.18963	309.781	2.43804e-69	1.60071e-68	2.36904	1.10602	14.8601	3.96332e-39	1.57461e-38	77.9015
JCHAIN	3151	3.84453	0.206806	18.59	3.87215e-77	2.55989e-76	3.87135	6.34276	275.29	7.98182e-62	4.4191e-61	3.7543	3.72737	14.0391	7.06607e-36	2.51986e-35	70.2832
WFDC1	108.756	2.41641	0.130233	18.5545	7.50625e-77	4.94659e-76	2.40412	1.49118	313.543	3.69328e-70	2.46592e-69	2.20162	0.443661	15.3059	6.53497e-41	2.75314e-40	82.0433
AL928768.3	27.0266	4.66134	0.251277	18.5506	8.071e-77	5.31594e-76	2.47282	-0.282438	66.2646	3.94268e-16	7.51463e-16	3.15713	-3.04743	14.3639	3.70053e-37	1.38073e-36	73.609
AC124789.1	27.8517	3.27945	0.176793	18.5497	8.20478e-77	5.40263e-76	3.24242	-0.374009	304.76	3.02593e-68	1.93154e-67	2.38528	-2.0715	13.026	6.14297e-32	1.94934e-31	61.6287
FAM124B	37.0156	2.08751	0.112566	18.5449	8.97202e-77	5.89845e-76	2.06765	0.0163176	316.776	7.29855e-71	4.94354e-70	2.12145	-0.840663	17.929	1.48448e-51	9.04124e-51	106.529
AC007283.5	21.7576	3.57697	0.193027	18.5309	1.16295e-76	7.62737e-76	3.41867	-0.708706	324.136	1.81956e-72	1.27703e-71	4.23526	-2.43634	28.3145	7.85405e-93	3.99639e-91	201.13
HS3ST2	78.8227	2.92104	0.157708	18.5218	1.37773e-76	9.02414e-76	2.87707	1.04842	298.8	6.01359e-67	3.72377e-66	2.55509	-0.435356	14.3501	4.19609e-37	1.56235e-36	73.3718
RP11-78A19.3	105.408	2.61554	0.141228	18.5199	1.42698e-76	9.33929e-76	2.60911	1.45364	316.089	1.02994e-70	6.9477e-70	3.05706	0.185372	16.6476	2.48533e-46	1.25255e-45	94.5001
SPATA12	9.26573	3.25069	0.175526	18.5197	1.43153e-76	9.36663e-76	3.19307	-1.76489	359.555	3.51884e-80	2.94295e-79	2.98078	-3.18295	19.5482	3.563e-58	2.8384e-57	121.743
IGLV3-19	217.504	4.64902	0.25122	18.5058	1.85329e-76	1.20943e-75	4.64339	2.49056	256.657	9.1867e-58	4.64782e-57	4.88359	-0.878774	15.231	1.30494e-40	5.43767e-40	81.4389
DIAPH2-AS1	5.54559	3.79351	0.205016	18.5035	1.93648e-76	1.26273e-75	3.70035	-2.34034	387.6	2.75699e-86	2.67522e-85	2.81891	-3.78898	19.4952	5.86956e-58	4.63867e-57	121.246
MAB21L2	89.3896	3.96219	0.214253	18.493	2.35074e-76	1.53125e-75	4.23752	1.53221	284.78	6.82356e-64	3.94956e-63	2.69211	-1.32112	10.9865	2.39376e-24	6.05661e-24	44.2309
MTRNR2L12	12.5282	2.60792	0.14104	18.4906	2.45903e-76	1.60053e-75	3.3149	-0.834123	303.907	4.64105e-68	2.95038e-67	2.86135	-2.52726	20.9263	8.60938e-64	8.73283e-63	134.612
UGT1A8	11.7898	5.28272	0.285958	18.4738	3.35613e-76	2.17531e-75	4.97406	-1.47546	276.226	4.98958e-62	2.78168e-61	3.30973	-3.74372	15.4816	1.28705e-41	5.55034e-41	83.8259
RP11-30P6.6	15.0642	3.68843	0.199717	18.4683	3.71465e-76	2.40392e-75	3.62464	-1.152	309.997	2.18717e-69	1.43828e-68	3.51524	-2.97356	20.6937	7.59763e-63	7.41284e-62	132.444
IFNWP19	11.5219	5.01776	0.271712	18.4672	3.79206e-76	2.45338e-75	4.92441	-1.48867	313.792	3.25949e-70	2.17922e-69	3.10712	-3.74099	15.0018	1.07773e-39	4.35779e-39	79.4254
LAMP5	492.944	3.86351	0.209236	18.4648	3.96249e-76	2.56164e-75	3.83702	3.65864	270.522	8.73106e-61	4.72642e-60	5.69227	1.03109	23.9913	4.13154e-76	7.39656e-75	162.86
NKX3-2	57.5496	2.53984	0.13757	18.4622	4.16155e-76	2.68893e-75	2.49491	0.608941	303.511	5.66002e-68	3.59264e-67	2.31231	-0.558397	14.1826	1.92312e-36	7.00292e-36	71.8635
LINC01094	48.6423	2.55978	0.138771	18.446	5.61374e-76	3.61689e-75	2.52736	0.398291	304.469	3.50149e-68	2.23224e-67	2.76521	-0.814345	19.2377	6.61704e-57	4.99416e-56	118.804
LINC01269	3.64985	4.30804	0.233849	18.4224	8.69305e-76	5.57915e-75	4.88133	-2.75374	389.229	1.2185e-86	1.19214e-85	2.58841	-4.35675	17.3921	2.31207e-49	1.30175e-48	101.565
SLA2	56.4396	2.17105	0.117926	18.4103	1.08678e-75	6.96767e-75	2.1767	0.582229	315.264	1.55812e-70	1.04793e-69	2.02789	-0.28519	17.57	4.3437e-50	2.51009e-49	103.142
IGSF6	212.224	2.55881	0.139049	18.4023	1.25975e-75	8.06209e-75	2.56345	2.45661	302.162	1.11358e-67	7.01634e-67	2.80888	1.26869	19.1661	1.29919e-56	9.70235e-56	118.04
LIPG	329.415	2.13719	0.116188	18.3942	1.46281e-75	9.35196e-75	2.15508	3.0786	310.524	1.67868e-69	1.10507e-68	2.18533	2.23978	17.2851	6.31294e-49	3.49279e-48	100.295
RP11-284F21.7	20.1936	3.21861	0.175002	18.3918	1.52702e-75	9.75491e-75	3.10948	-0.779571	298.532	6.87965e-67	4.25582e-66	3.16671	-2.38006	17.5964	3.39062e-50	1.96711e-49	103.456
KRT23	784	3.37247	0.183444	18.3843	1.75619e-75	1.12074e-74	3.35471	4.30726	281.583	3.39353e-63	1.93846e-62	2.97396	2.2826	11.4462	5.20057e-26	1.38246e-25	47.7437
FRZB	628.322	2.28948	0.124672	18.3641	2.54653e-75	1.62094e-74	2.29219	3.99227	308.099	5.66558e-69	3.68085e-68	2.02338	3.07372	15.8882	2.96295e-43	1.35096e-42	87.1872
CPXM1	813.161	2.77214	0.15102	18.3562	2.94697e-75	1.87487e-74	2.7661	4.36548	292.722	1.26919e-65	7.63084e-65	2.86466	3.00055	16.9047	2.23768e-47	1.17273e-46	96.6985
CERKL	185.787	2.16927	0.118241	18.3462	3.53844e-75	2.24599e-74	2.17326	2.25863	309.271	3.14778e-69	2.06016e-68	2.18373	1.40127	19.5366	3.97278e-58	3.15876e-57	121.502
ISL2	13.6212	2.63754	0.143803	18.3413	3.87405e-75	2.45524e-74	2.55943	-1.30097	323.829	2.12313e-72	1.48547e-71	2.5486	-2.46632	17.8771	2.41949e-51	1.46034e-50	106.085
EVX1	11.9413	5.62703	0.30684	18.3387	4.0664e-75	2.57583e-74	6.89647	-0.427335	297.555	1.1233e-66	6.91955e-66	2.91651	-4.01564	12.9399	1.31459e-31	4.12727e-31	60.9322
OLR1	521.155	3.10542	0.169407	18.3311	4.67484e-75	2.95672e-74	2.47249	3.82102	153.117	3.61091e-35	1.09385e-34	3.13133	2.02458	13.1061	3.02035e-32	9.67471e-32	62.0573
IGHV3-13	28.7794	5.36458	0.292789	18.3224	5.48708e-75	3.46339e-74	4.73042	-0.301777	203.397	3.78876e-46	1.46792e-45	3.56873	-3.2864	14.2212	1.35539e-36	4.95811e-36	72.3211
CST7	127.394	2.5748	0.140559	18.3183	5.91602e-75	3.73223e-74	2.5592	1.71608	302.777	8.17927e-68	5.17319e-67	2.70956	0.516216	18.8335	2.9761e-55	2.10061e-54	114.959
RELT	254.76	2.00181	0.10928	18.3183	5.91822e-75	3.73267e-74	2.00644	2.70013	313.354	4.06004e-70	2.71008e-69	2.08224	1.96992	20.3315	2.26779e-61	2.07256e-60	128.914
SOX11	36.8389	4.45294	0.24311	18.3166	6.1046e-75	3.84924e-74	4.41551	-0.00200555	274.283	1.32299e-61	7.29217e-61	4.4866	-2.58525	20.6327	1.34536e-62	1.29785e-61	131.877
RENBP	217.796	2.06597	0.112978	18.2865	1.05943e-74	6.65487e-74	2.05365	2.46814	308.788	4.01152e-69	2.61719e-68	2.02095	1.69929	18.2999	4.52249e-53	2.91759e-52	109.859
CTD-2171N6.1	17.4227	5.29913	0.289804	18.2852	1.08482e-74	6.81265e-74	5.20029	-0.981718	292.377	1.50916e-65	9.05384e-65	3.19363	-3.70697	15.763	9.47787e-43	4.24887e-42	86.4195
TSLP	25.9575	2.48933	0.136169	18.2812	1.16775e-74	7.32973e-74	2.44319	-0.459485	304.417	3.5936e-68	2.29037e-67	2.46489	-1.58952	17.5668	4.4774e-50	2.58494e-49	103.161
IGHV3-33	251.587	4.71557	0.258171	18.2653	1.56292e-74	9.79035e-74	4.68809	2.69137	255.759	1.44227e-57	7.25986e-57	4.70943	-0.705587	14.0449	6.70512e-36	2.39423e-35	70.6347
FAM111B	96.4566	2.95973	0.162084	18.2604	1.70916e-74	1.06983e-73	3.03958	1.33307	322.23	4.73302e-72	3.29019e-71	3.96636	-0.311017	22.2953	2.48754e-69	3.20874e-68	147.307
IFNE	23.428	4.74409	0.260422	18.2169	3.78721e-74	2.35454e-73	4.66016	-0.608932	274.447	1.218e-61	6.72391e-61	3.05653	-3.25973	12.957	1.12995e-31	3.55475e-31	61.0663
STMN2	417.165	2.42377	0.133117	18.2079	4.47145e-74	2.77576e-73	2.44113	3.42014	300.004	3.28826e-67	2.04639e-66	2.03669	2.37015	11.4425	5.36361e-26	1.42519e-25	47.6673
CD2	224.618	2.67471	0.146984	18.1973	5.42585e-74	3.36487e-73	2.67453	2.52789	295.022	4.00203e-66	2.43863e-65	2.71586	1.23806	16.4915	1.07005e-45	5.27713e-45	92.9719
TMEM132E	29.5325	2.69357	0.148061	18.1923	5.94107e-74	3.68071e-73	3.21754	0.168878	300.335	2.78431e-67	1.73668e-66	2.76528	-1.57905	19.0072	5.7986e-56	4.22119e-55	116.66
C1QA	2705.51	2.40436	0.132284	18.1758	8.02368e-74	4.96477e-73	2.41408	6.09713	297.437	1.19166e-66	7.33518e-66	2.4895	5.03067	19.6453	1.43028e-58	1.15874e-57	122.294
FOXD1-AS1	8.72774	4.59831	0.253023	18.1734	8.3791e-74	5.1821e-73	4.08785	-1.80746	316.712	7.53367e-71	5.10002e-70	2.8843	-3.67075	15.4266	2.14126e-41	9.16084e-41	83.3211
IGLV2-11	229.78	4.07361	0.224236	18.1666	9.48784e-74	5.86489e-73	4.07455	2.57493	260.085	1.64432e-58	8.44819e-58	4.36263	-0.238149	14.1887	1.82097e-36	6.63971e-36	71.906
IGKV2D-28	134.026	6.12616	0.337237	18.1657	9.64276e-74	5.95769e-73	6.04134	1.82119	232.334	1.84605e-52	8.26381e-52	5.23026	-2.26362	14.1566	2.43626e-36	8.83135e-36	71.7035
CACNG8	28.0184	3.47601	0.191502	18.1513	1.25413e-73	7.72926e-73	3.4244	-0.361161	286.221	3.311e-64	1.9313e-63	2.76006	-2.25639	14.1	4.06896e-36	1.46578e-35	71.2009
CA9	1938.23	3.86949	0.213198	18.1497	1.29084e-73	7.95357e-73	3.87338	5.59428	265.533	1.06767e-59	5.6311e-59	2.60959	2.85092	8.88429	3.34574e-17	6.81751e-17	27.5488
C16orf74	73.9517	2.8641	0.157806	18.1495	1.29554e-73	7.98053e-73	2.83811	0.960146	289.167	7.55203e-65	4.46168e-64	2.16342	-0.497452	12.1125	1.78966e-28	5.12206e-28	53.6108
IGHA1	18894.8	3.63979	0.200767	18.1294	1.8666e-73	1.1467e-72	3.6531	8.90788	265.47	1.10236e-59	5.80912e-59	4.01412	6.60818	15.3085	6.38101e-41	2.68919e-40	81.7612
SPACA4	15.5525	3.31937	0.183111	18.1277	1.92695e-73	1.1829e-72	3.2391	-1.14435	301.681	1.41767e-67	8.9052e-67	2.85858	-2.76554	16.1202	3.41829e-44	1.60029e-43	89.71
IGHD	232.618	4.73474	0.261206	18.1265	1.9694e-73	1.20836e-72	2.99899	2.65185	89.7968	2.63916e-21	5.75761e-21	3.27932	-1.04147	9.57228	1.89905e-19	4.1459e-19	33.0323
CHRNA3	67.774	2.90345	0.160284	18.1144	2.45361e-73	1.50396e-72	3.10122	1.03073	296.052	2.3877e-66	1.4614e-65	2.33482	-0.652134	13.7179	1.28104e-34	4.40269e-34	67.6909
IGKV6-21	41.6164	5.34934	0.295462	18.105	2.91053e-73	1.78096e-72	4.65301	0.185858	185.297	3.37987e-42	1.19859e-41	3.41681	-3.11737	13.204	1.26736e-32	4.09657e-32	63.2335
EPHB1	35.4188	2.58365	0.142874	18.0834	4.30454e-73	2.62684e-72	2.55526	-0.0353693	296.669	1.75209e-66	1.07449e-65	2.41324	-1.26159	16.9664	1.2555e-47	6.64434e-47	97.5377
TMEM26	40.0524	2.71955	0.150425	18.0791	4.65626e-73	2.84077e-72	2.70028	0.129812	294.575	5.00904e-66	3.04404e-65	3.34342	-1.26814	23.2107	5.2924e-73	8.1221e-72	155.735
LINC00426	21.1427	2.66573	0.14749	18.0739	5.11443e-73	3.118e-72	2.04039	-0.660791	144.488	2.77858e-33	8.05075e-33	2.41998	-1.95179	16.8055	5.66849e-47	2.92325e-46	96.0593
RP11-316M1.12	165.971	4.64939	0.257353	18.0662	5.88338e-73	3.58152e-72	4.47991	1.97485	243.376	7.22091e-55	3.40749e-54	4.40222	-1.14145	14.0211	8.31013e-36	2.95629e-35	70.4424
IGKV1-33	333.407	4.53387	0.251042	18.0602	6.55616e-73	3.98815e-72	4.53375	3.10113	253.846	3.768e-57	1.87878e-56	5.16167	-0.290889	15.2085	1.60608e-40	6.67345e-40	81.2073
TIMD4	13.2544	4.1972	0.232584	18.046	8.48701e-73	5.15259e-72	3.43624	-1.31065	196.613	1.14567e-44	4.29082e-44	2.80796	-3.38186	14.8567	4.08946e-39	1.6242e-38	78.0964
IGHV1-69-2	180.321	4.8401	0.268239	18.044	8.79656e-73	5.33661e-72	4.81247	2.22373	238.977	6.57381e-54	3.02847e-53	5.29493	-1.31962	16.175	2.05182e-44	9.67136e-44	90.1752
RP4-794I6.4	25.9266	2.36755	0.131248	18.0387	9.67504e-73	5.86096e-72	2.32824	-0.473121	302.656	8.69384e-68	5.49444e-67	2.07818	-1.48248	14.6988	1.73903e-38	6.76301e-38	76.594
HHLA2	307.837	2.87899	0.159626	18.0358	1.0195e-72	6.1729e-72	2.89964	2.97776	289.767	5.58757e-65	3.31609e-64	2.45699	1.46641	10.0949	3.23099e-21	7.43754e-21	36.8457
ACTBL2	12.6117	3.99581	0.221583	18.033	1.07358e-72	6.49879e-72	3.91061	-1.37131	303.783	4.93933e-68	3.13759e-67	3.23648	-3.30122	17.1277	2.76478e-48	1.49277e-47	99.0897
CTD-2547H18.1	9.67147	5.42688	0.301212	18.0168	1.43816e-72	8.68036e-72	6.05196	-1.41387	310.535	1.66993e-69	1.09961e-68	2.97581	-4.10612	14.6721	2.22044e-38	8.61093e-38	76.4237
LINC01215	21.1084	4.59147	0.254926	18.011	1.59685e-72	9.61478e-72	2.22785	-0.570791	52.5564	4.18078e-13	7.35271e-13	3.07681	-3.2524	14.7498	1.0899e-38	4.26326e-38	77.1179
IGKV3D-20	40.2	5.06083	0.281034	18.0079	1.69005e-72	1.01735e-71	4.95729	0.131751	247.268	1.02334e-55	4.92931e-55	3.78856	-2.92251	15.3416	4.69937e-41	1.98791e-40	82.5228
HOXC-AS2	5.59156	4.36474	0.242416	18.0052	1.77434e-72	1.06731e-71	4.42319	-2.32389	341.783	2.60966e-76	1.98836e-75	2.78338	-4.0451	16.314	5.60972e-45	2.69847e-44	91.5245
CACNG6	27.431	5.52185	0.306693	18.0045	1.7972e-72	1.0808e-71	5.39459	-0.399753	252.404	7.76772e-57	3.84377e-56	2.98048	-3.5824	11.2565	2.54662e-25	6.62356e-25	46.558
KLHL6	267.977	2.37434	0.131928	17.9972	2.04762e-72	1.22931e-71	2.00673	2.84511	171.23	3.98632e-39	1.31803e-38	2.02931	1.76821	13.2275	1.02851e-32	3.33146e-32	63.1198
NCR3	13.0018	3.73037	0.20734	17.9915	2.27004e-72	1.36219e-71	2.38585	-1.24934	101.849	5.99317e-24	1.39629e-23	2.97557	-3.15749	17.9907	8.30612e-52	5.11404e-51	107.157
E2F7	57.5572	2.3351	0.129799	17.9901	2.33085e-72	1.39834e-71	2.33439	0.621955	298.07	8.67462e-67	5.35553e-66	2.04016	-0.414608	13.2548	8.06718e-33	2.62262e-32	63.5544
NEFL	48.0179	3.27193	0.182011	17.9766	2.97329e-72	1.78204e-71	3.61022	0.704443	289.225	7.33522e-65	4.33978e-64	2.79927	-1.45138	14.9983	1.11355e-39	4.49676e-39	79.3272
FAM207BP	5.88182	2.3313	0.129744	17.9685	3.43887e-72	2.06009e-71	2.13442	-2.26793	361.604	1.25993e-80	1.06376e-79	2.31088	-3.1691	19.6265	1.70644e-58	1.37618e-57	122.475
APLN	70.0035	2.46226	0.13713	17.9557	4.3324e-72	2.58849e-71	2.79246	1.16113	304.353	3.70958e-68	2.36368e-67	2.0008	-0.224281	12.5454	4.19322e-30	1.2569e-29	57.3223
RP1-232L22__B.1	9.64629	2.9514	0.164399	17.9526	4.57675e-72	2.73186e-71	2.70097	-1.66303	308.187	5.42089e-69	3.52464e-68	2.73676	-2.92198	19.0746	3.07222e-56	2.26034e-55	117.308
AKR1B15	6.66872	4.16733	0.232262	17.9424	5.50718e-72	3.28407e-71	4.09478	-2.11571	334.359	1.0798e-74	7.94443e-74	2.85087	-3.84343	17.5174	7.12388e-50	4.08907e-49	102.733
RSAD2	408.608	2.25329	0.125652	17.9328	6.54057e-72	3.8947e-71	2.27439	3.38366	297.376	1.22884e-66	7.56216e-66	2.01885	2.44463	14.76	9.92735e-39	3.89056e-38	76.8519
COL24A1	49.9465	2.73205	0.152361	17.9315	6.70067e-72	3.98812e-71	2.70229	0.426403	282.957	1.70276e-63	9.78506e-63	2.82929	-0.979217	17.0926	3.84499e-48	2.06701e-47	98.706
RP11-424C20.2	11.8791	3.00791	0.167795	17.9261	7.37784e-72	4.38695e-71	2.82177	-1.42691	293.152	1.02287e-65	6.16327e-65	2.84887	-2.79533	16.4486	1.59622e-45	7.82076e-45	92.7587
FOLR2	282.48	2.27403	0.12687	17.9241	7.64613e-72	4.54539e-71	2.28963	2.85743	294.2	6.04589e-66	3.66517e-65	2.01994	1.90617	13.3684	2.93243e-33	9.679e-33	64.3542
RP11-58E21.3	11.4004	2.71296	0.151519	17.9051	1.07622e-71	6.37797e-71	2.67141	-1.50084	319.941	1.49191e-71	1.02506e-70	2.87941	-2.74958	19.9289	9.93608e-60	8.46681e-59	125.304
CD6	206.26	2.34483	0.131105	17.8851	1.54084e-71	9.11185e-71	2.33382	2.39204	291.541	2.29519e-65	1.37132e-64	2.20306	1.39436	16.6831	1.78231e-46	9.0044e-46	94.7374
FER1L6	352.557	5.39257	0.301596	17.8801	1.6861e-71	9.96138e-71	5.49028	3.18004	234.765	5.44882e-53	2.46852e-52	5.88221	-1.21421	14.6913	1.86255e-38	7.23433e-38	76.5176
TYROBP	1055.57	2.27697	0.12738	17.8754	1.83471e-71	1.08239e-70	2.27829	4.738	289.825	5.42965e-65	3.22467e-64	2.36547	3.79008	19.6455	1.42746e-58	1.15683e-57	122.358
DHFRP1	19.6822	3.09842	0.173418	17.8668	2.13936e-71	1.25972e-70	3.00228	-0.798513	285.537	4.66741e-64	2.71166e-63	3.41396	-2.3463	18.7703	5.3937e-55	3.75157e-54	114.452
APOBR	367.874	2.13455	0.119508	17.8611	2.37065e-71	1.39459e-70	2.13359	3.22569	292.434	1.46619e-65	8.80244e-65	2.20252	2.38159	18.9081	1.4736e-55	1.05116e-54	115.525
CCL19	571.017	4.02452	0.22548	17.8486	2.96114e-71	1.73949e-70	3.998	3.8485	249.088	4.10468e-56	1.99459e-55	4.00903	0.915732	11.5301	2.56378e-26	6.87413e-26	48.5902
SH2D1B	11.3373	2.76126	0.154726	17.8461	3.09846e-71	1.81886e-70	2.14437	-1.46324	158.396	2.53618e-36	7.9026e-36	2.41696	-2.74358	16.6846	1.75722e-46	8.88126e-46	94.9532
RP11-1143G9.4	1048.46	5.11872	0.287217	17.8218	4.788e-71	2.79875e-70	5.2048	5.47144	194.927	2.67247e-44	9.92969e-44	5.01991	0.577762	11.1713	5.18176e-25	1.33598e-24	45.6439
HAVCR1	16.7532	4.54042	0.254785	17.8206	4.89072e-71	2.85745e-70	4.47435	-0.995843	277.108	3.20426e-62	1.79403e-61	3.00243	-3.43421	13.9753	1.25762e-35	4.44527e-35	70.1142
TMEM119	1226.14	2.20306	0.123635	17.8191	5.02302e-71	2.93406e-70	2.2162	4.96601	287.522	1.7236e-64	1.01179e-63	2.04527	4.06527	15.6261	3.37572e-42	1.48254e-41	84.6823
CD7	140.624	2.46221	0.138231	17.8123	5.67213e-71	3.3101e-70	2.43333	1.84221	285.868	3.95346e-64	2.3001e-63	2.34148	0.722996	16.9937	9.71929e-48	5.15683e-47	97.6926
FAM159A	16.912	2.73683	0.15365	17.8121	5.6981e-71	3.32447e-70	2.29974	-0.990305	191.075	1.85257e-43	6.75295e-43	2.53076	-2.29746	17.6952	1.33818e-50	7.8703e-50	104.38
HAVCR2	346.301	2.13216	0.119759	17.8037	6.6099e-71	3.85193e-70	2.14395	3.14989	288.488	1.06176e-64	6.25644e-64	2.07599	2.3017	16.0583	6.08337e-44	2.82348e-43	88.8377
PDCD1LG2	48.0126	2.39494	0.134559	17.7984	7.2702e-71	4.23473e-70	2.37799	0.375804	291.847	1.96814e-65	1.1779e-64	2.41316	-0.729664	18.0531	4.61739e-52	2.87787e-51	107.689
CSTA	197.171	2.64771	0.148768	17.7975	7.38691e-71	4.3017e-70	2.61531	2.31191	282.593	2.04405e-63	1.17111e-62	2.21438	1.02683	13.2398	9.22043e-33	2.9905e-32	63.3065
HIST1H2BC	61.129	2.4196	0.13601	17.7898	8.4766e-71	4.92702e-70	2.4175	0.695061	292.265	1.59626e-65	9.56949e-65	2.20159	-0.417611	14.307	6.21527e-37	2.29694e-36	72.979
RPL10P3	7.43138	3.30378	0.185714	17.7897	8.50029e-71	4.93964e-70	3.15751	-2.09085	349.203	6.31954e-78	5.01985e-77	2.86486	-3.42556	20.1695	1.03762e-60	9.23478e-60	127.55
SDS	212.608	3.15713	0.177511	17.7856	9.14567e-71	5.31219e-70	3.12895	2.43318	268.422	2.5047e-60	1.34242e-59	3.4646	0.573456	17.0395	6.32664e-48	3.37552e-47	98.1405
IGKV3D-15	16.8548	5.69041	0.319959	17.7848	9.27348e-71	5.38391e-70	5.59167	-0.999239	274.03	1.50204e-61	8.26987e-61	3.2969	-3.77071	14.7745	8.69213e-39	3.4124e-38	77.3498
LGALS9C	39.3404	4.05772	0.228194	17.7819	9.76655e-71	5.6662e-70	3.98768	0.0758854	260.658	1.2331e-58	6.35117e-58	3.5831	-2.35327	15.3666	3.72885e-41	1.58275e-40	82.7399
CD1A	43.4634	4.43226	0.249269	17.781	9.92022e-71	5.75401e-70	4.37623	0.222307	252.576	7.12508e-57	3.52928e-56	4.96745	-2.45295	23.5841	1.71496e-74	2.84274e-73	159.136
IGKV1-6	54.3918	4.34895	0.244652	17.7761	1.0824e-70	6.27235e-70	4.31636	0.545537	249.969	2.63692e-56	1.28842e-55	4.11327	-2.20486	16.9358	1.67272e-47	8.80545e-47	97.2795
CPA6	32.2596	5.08718	0.286251	17.7718	1.16972e-70	6.77364e-70	5.01348	-0.174339	247.632	8.52574e-56	4.11233e-55	3.13486	-3.28397	11.7319	4.6433e-27	1.27204e-26	50.5207
RP11-714M23.2	35.1525	4.39075	0.247126	17.7672	1.26806e-70	7.33798e-70	4.3599	-0.0150464	253.405	4.69971e-57	2.33818e-56	2.67592	-2.79866	10.4024	2.78653e-22	6.61367e-22	39.5982
FAM150A	23.7172	3.1525	0.177476	17.763	1.36815e-70	7.91163e-70	3.08587	-0.584552	275.708	6.46997e-62	3.59409e-61	2.44584	-2.20898	11.676	7.46757e-27	2.0323e-26	50.0076
IGKV1-12	17.0972	5.58607	0.314687	17.7512	1.68715e-70	9.73818e-70	4.67122	-0.982652	184.873	4.18436e-42	1.48135e-41	3.20098	-3.73851	13.8249	4.88862e-35	1.69894e-34	68.7694
KLHL4	32.7294	2.59487	0.14627	17.7402	2.05124e-70	1.18232e-69	2.57666	-0.129051	284.494	7.87476e-64	4.55163e-63	2.26132	-1.39206	14.4623	1.50925e-37	5.71633e-37	74.4398
PPFIA2	47.8794	2.51441	0.141852	17.7256	2.66163e-70	1.53095e-69	2.49297	0.370399	279.928	7.78426e-63	4.41303e-62	2.59424	-0.846214	16.5915	4.19858e-46	2.10107e-45	94.0262
GS1-44D20.1	9.18883	2.67467	0.150926	17.7217	2.85002e-70	1.63893e-69	2.62646	-1.736	326.658	5.13744e-73	3.64583e-72	2.72906	-2.87796	20.2642	4.26476e-61	3.84944e-60	128.436
LAPTM5	4518.81	2.38884	0.13489	17.7095	3.54052e-70	2.03318e-69	2.39835	6.83764	282.888	1.76293e-63	1.01262e-62	2.59625	5.74041	20.8169	2.39737e-63	2.38498e-62	133.271
IGKV2-24	81.0344	4.13486	0.233556	17.704	3.90691e-70	2.24047e-69	3.11184	1.16695	127.101	1.76575e-29	4.67983e-29	3.73642	-1.58383	13.3664	2.9838e-33	9.84332e-33	64.6113
IGHV6-1	32.3212	4.70324	0.265708	17.7008	4.13554e-70	2.37104e-69	4.58653	-0.159747	249.72	2.98897e-56	1.45728e-55	3.89915	-2.87645	16.3348	4.62228e-45	2.23256e-44	91.6991
CCL26	30.2571	3.75852	0.212416	17.6941	4.65527e-70	2.66655e-69	3.7982	0.0485709	228.204	1.46873e-51	6.44801e-51	3.57532	-2.407	19.8378	2.34079e-59	1.96366e-58	124.45
UBXN10-AS1	7.68315	3.02871	0.171413	17.6691	7.25269e-70	4.14194e-69	2.93418	-1.99848	336.075	4.56762e-75	3.38159e-74	2.68285	-3.29218	21.1241	1.3539e-64	1.41078e-63	136.447
CD300LF	111.397	2.76714	0.156974	17.628	1.50231e-69	8.5422e-69	2.74416	1.53748	272.976	2.54857e-61	1.39853e-60	3.23576	0.067013	19.6975	8.75162e-59	7.16254e-58	123.089
LINC01436	21.113	3.80371	0.215874	17.6201	1.72798e-69	9.80906e-69	3.75245	-0.700069	266.645	6.11245e-60	3.23966e-59	2.60021	-2.87254	12.8989	1.88689e-31	5.89572e-31	60.5478
AC093850.2	45.3899	4.60482	0.26134	17.6201	1.72827e-69	9.80906e-69	4.56127	0.30567	242.665	1.03208e-54	4.84453e-54	5.23758	-2.48345	23.7537	3.62623e-75	6.22703e-74	160.683
YWHAZP6	2.59668	3.46064	0.196484	17.6128	1.96339e-69	1.11359e-68	3.64134	-3.06281	365.243	2.03232e-81	1.74497e-80	2.36502	-4.35429	18.1168	2.53479e-52	1.59144e-51	108.342
KRT6B	510.493	3.81037	0.216356	17.6116	2.00619e-69	1.1376e-68	3.76463	3.69159	245.565	2.40647e-55	1.14958e-54	3.61843	1.00392	10.6526	3.68962e-23	9.00413e-23	41.3555
IGHV3-72	40.0571	4.41509	0.250766	17.6064	2.1988e-69	1.24625e-68	4.37693	0.142156	244.583	3.93992e-55	1.87239e-54	3.59848	-2.61524	14.294	6.99083e-37	2.57895e-36	72.9634
DNAJC5B	21.9559	3.31355	0.188708	17.5592	5.05912e-69	2.85248e-68	2.77416	-0.624232	170.579	5.5294e-39	1.82193e-38	3.73995	-2.43859	22.0838	1.77097e-68	2.19217e-67	145.353
TREML2	19.2969	3.34789	0.191195	17.5103	1.19501e-68	6.70433e-68	2.00873	-0.702667	76.7668	1.92389e-18	3.895e-18	2.6272	-2.59638	13.771	7.94487e-35	2.74609e-34	68.2603
NIPAL4	21.4636	3.60299	0.205788	17.5083	1.23882e-68	6.94696e-68	3.56443	-0.710485	271.048	6.70655e-61	3.64001e-60	2.85236	-2.70274	14.5348	7.78882e-38	2.97682e-37	75.15
LINC00589	2.9943	4.01201	0.229201	17.5043	1.32809e-68	7.43917e-68	5.51664	-2.38486	345.962	3.21013e-77	2.49956e-76	2.41749	-4.43955	15.6678	2.29274e-42	1.01391e-41	85.5516
LIF	1189.38	2.72517	0.155822	17.489	1.73647e-68	9.6895e-68	2.76006	4.91476	278.448	1.63606e-62	9.21411e-62	3.17857	3.48723	19.4958	5.83357e-58	4.61169e-57	121.005
TMEM233	29.2448	2.22989	0.127505	17.4887	1.74709e-68	9.74658e-68	2.18335	-0.313874	281.975	2.78786e-63	1.59469e-62	2.17632	-1.28835	17.1657	1.93562e-48	1.05125e-47	99.4005
CD28	64.4612	3.14087	0.179673	17.4811	1.99713e-68	1.1139e-67	3.11342	0.773669	264.174	2.11244e-59	1.10639e-58	3.48086	-1.0396	19.2282	7.23479e-57	5.4488e-56	118.722
MMP7	13005.9	3.07371	0.17584	17.4801	2.02973e-68	1.13157e-67	3.06591	8.36469	256.414	1.03807e-57	5.24334e-57	3.27771	6.63895	14.1623	2.31403e-36	8.39809e-36	71.2659
CTC-518P12.6	19.6101	4.79815	0.27454	17.4771	2.14289e-68	1.19359e-67	4.48214	-0.941551	252.43	7.66712e-57	3.79474e-56	3.71566	-3.32687	19.0346	4.47975e-56	3.27166e-55	116.933
APLNR	707.93	2.5619	0.146711	17.4623	2.77692e-68	1.54501e-67	2.57101	4.17121	272.16	3.83906e-61	2.10065e-60	2.91098	2.93825	18.2345	8.37295e-53	5.36677e-52	109.176
MS4A8	300.182	3.08266	0.176605	17.4551	3.14559e-68	1.74895e-67	3.07879	2.93088	262.334	5.31874e-59	2.76354e-58	2.19752	1.11621	9.74446	5.02839e-20	1.11522e-19	34.1555
CFAP54	14.4795	2.40828	0.138014	17.4496	3.46836e-68	1.92798e-67	2.367	-1.20098	289.104	7.79569e-65	4.60344e-64	2.35386	-2.30421	17.2198	1.16519e-48	6.38974e-48	99.9347
TRBV20-1	11.2635	3.67274	0.210618	17.4379	4.25556e-68	2.36345e-67	2.91277	-1.47117	166.264	4.84288e-38	1.56275e-37	2.99087	-3.28349	17.4243	1.70711e-49	9.66376e-49	101.86
WFDC21P	63.1995	2.85772	0.163996	17.4255	5.28137e-68	2.92923e-67	2.79582	0.727144	269.738	1.29436e-60	6.98093e-60	3.02601	-0.781825	16.5756	4.87159e-46	2.43051e-45	93.8759
CXCL10	178.456	3.55705	0.204177	17.4213	5.68213e-68	3.14799e-67	3.55097	2.21697	249.033	4.21929e-56	2.04948e-55	4.06432	-0.171867	17.1241	2.86126e-48	1.54318e-47	98.9701
SLC16A6	64.4751	2.28841	0.131383	17.4179	6.0393e-68	3.34438e-67	2.27698	0.774114	279.634	9.02418e-63	5.10897e-62	2.48138	-0.270889	19.0443	4.08789e-56	2.98812e-55	116.972
TNFRSF17	19.681	3.72592	0.213977	17.4127	6.60822e-68	3.65616e-67	3.06816	-0.785096	166.949	3.43184e-38	1.11147e-37	2.96584	-2.84087	14.4733	1.36556e-37	5.17683e-37	74.5957
RP11-626H12.1	5.11666	4.20262	0.241957	17.3693	1.40962e-67	7.76965e-67	4.29171	-2.38572	326.257	6.28194e-73	4.44787e-72	2.8494	-4.08555	18.0684	3.99762e-52	2.49786e-51	107.888
MME	265.729	2.78637	0.160533	17.357	1.7475e-67	9.61493e-67	2.81168	2.77807	269.936	1.17198e-60	6.32776e-60	2.33598	1.26083	11.851	1.68464e-27	4.67599e-27	51.2322
CCR4	53.3883	3.81415	0.219809	17.3522	1.89954e-67	1.04492e-66	3.79126	0.519479	249.162	3.95407e-56	1.92253e-55	4.22328	-1.87434	19.293	3.93411e-57	3.00116e-56	119.344
CTD-2196E14.5	10.8207	4.15405	0.239712	17.3293	2.82603e-67	1.54908e-66	3.96489	-1.59642	278.158	1.89269e-62	1.06401e-61	2.88846	-3.49921	14.7723	8.86752e-39	3.4807e-38	77.3282
AQP6	26.4317	3.15937	0.182354	17.3255	3.02069e-67	1.65395e-66	3.04926	-0.475304	258.609	3.44964e-58	1.76034e-57	2.24655	-2.14802	11.7294	4.74648e-27	1.29988e-26	50.4544
AIF1	492.102	2.1497	0.124167	17.313	3.75419e-67	2.05286e-66	2.15323	3.64316	275.807	6.15549e-62	3.42343e-61	2.27638	2.76563	18.6095	2.4522e-54	1.66186e-53	112.691
HIST1H2AG	20.1933	2.6447	0.152765	17.3123	3.80208e-67	2.07859e-66	2.60227	-0.787961	274.637	1.10761e-61	6.12129e-61	2.59835	-2.07104	16.2567	9.57905e-45	4.56803e-44	90.9573
FPR3	365.416	2.46933	0.142687	17.3059	4.24674e-67	2.32015e-66	2.48439	3.2348	270.283	9.84773e-61	5.32859e-60	2.48758	2.05097	15.0675	5.88933e-40	2.40365e-39	79.7201
IGLV2-8	239.308	3.89743	0.225263	17.3017	4.56602e-67	2.49404e-66	3.88369	2.63187	240.841	2.5782e-54	1.19868e-53	4.01624	-0.131333	13.2896	5.91618e-33	1.93169e-32	63.852
PIK3CG	102.403	2.45221	0.142001	17.269	8.05628e-67	4.37354e-66	2.46658	1.4382	271.046	6.71464e-61	3.6436e-60	2.5533	0.236954	16.6353	2.78671e-46	1.40216e-45	94.3802
RP11-13P5.2	6.31476	4.05709	0.23496	17.2671	8.31767e-67	4.51445e-66	3.98641	-2.19154	351.758	1.75503e-78	1.41033e-77	3.30807	-3.84679	23.2777	2.85705e-73	4.45904e-72	156.307
CD96	127.192	2.46586	0.142839	17.2633	8.89535e-67	4.82271e-66	2.46061	1.7256	269.584	1.39844e-60	7.53573e-60	2.36556	0.547543	15.3114	6.21293e-41	2.61968e-40	82.0869
CTLA4	41.7618	3.14058	0.181944	17.2612	9.2146e-67	4.99253e-66	3.10519	0.165498	261.361	8.66819e-59	4.47856e-58	3.64083	-1.62445	20.9295	8.35439e-64	8.47764e-63	134.642
HLA-DOA	704.376	2.4496	0.141915	17.2611	9.23862e-67	5.00445e-66	2.47012	4.17345	268.023	3.06042e-60	1.63532e-59	2.57365	3.02631	17.4524	1.31115e-49	7.45188e-49	101.814
VWA3B	19.7875	2.85888	0.165631	17.2606	9.31853e-67	5.04664e-66	2.90453	-0.819309	298.251	7.92039e-67	4.89476e-66	2.71958	-2.26048	15.5295	8.2624e-42	3.58678e-41	84.2372
IGHV4-4	47.8501	5.2575	0.304703	17.2545	1.03529e-66	5.60317e-66	5.24859	1.41411	166.109	5.23768e-38	1.68817e-37	3.66894	-2.92604	11.9946	4.92979e-28	1.39167e-27	52.7317
IL1A	35.021	3.97608	0.230641	17.2393	1.34719e-66	7.2801e-66	3.93816	-0.0728618	247.682	8.31539e-56	4.0132e-55	3.72565	-2.4781	17.0293	6.96262e-48	3.71006e-47	98.1579
CRISP3	1894.21	4.48528	0.260299	17.2312	1.54808e-66	8.35116e-66	4.14765	5.64843	185.361	3.27266e-42	1.16107e-41	3.08044	1.74609	6.70553	7.98692e-11	1.33011e-10	13.2008
RUNX3	308.497	2.426	0.140846	17.2244	1.74079e-66	9.38461e-66	2.43516	2.97952	271.055	6.68183e-61	3.62738e-60	2.53158	1.83949	17.2639	7.70565e-49	4.25292e-48	100.138
RP11-626G11.1	4.3541	3.74689	0.217673	17.2134	2.10644e-66	1.1346e-65	3.71354	-2.59929	332.201	3.1872e-74	2.31678e-73	2.49601	-4.06639	17.1026	3.4986e-48	1.88283e-47	98.8631
SERPINA1	32235.7	2.8411	0.165156	17.2025	2.54129e-66	1.36675e-65	2.83937	9.65846	252.981	5.81414e-57	2.888e-56	3.04203	8.23393	16.8716	3.05043e-47	1.59029e-46	96.3262
FCGR3A	1353.1	2.48977	0.144744	17.2013	2.59732e-66	1.39658e-65	2.51526	5.11636	265.863	9.04788e-60	4.78119e-59	2.52644	3.8963	17.1029	3.49101e-48	1.87915e-47	98.4741
CYP2C9	127.249	3.54868	0.206343	17.198	2.75081e-66	1.47879e-65	3.51819	1.71461	244.183	4.81529e-55	2.28445e-54	3.20084	-0.599511	12.0477	3.12531e-28	8.87418e-28	53.066
CYP2B7P	58.6571	2.73121	0.159208	17.1549	5.77367e-66	3.08779e-65	2.72533	0.64408	264.514	1.78033e-59	9.34219e-59	2.01824	-0.775939	11.1327	7.13743e-25	1.83297e-24	45.3955
IL1RAPL2	5.85699	4.10135	0.239205	17.1457	6.76792e-66	3.61485e-65	4.03472	-2.23982	300.012	3.27456e-67	2.03837e-66	2.703	-3.99206	16.4886	1.09895e-45	5.4175e-45	93.1453
LINC00578	11.875	3.4299	0.200072	17.1433	7.05281e-66	3.76458e-65	3.36755	-1.44147	279.905	7.87577e-63	4.4639e-62	3.20211	-3.1497	18.6019	2.63307e-54	1.782e-53	112.881
SERPINE1	5903.42	2.51514	0.146819	17.1308	8.74217e-66	4.65331e-65	2.5408	7.23124	264.311	1.97136e-59	1.03337e-58	2.52277	5.96439	15.6768	2.11044e-42	9.35123e-42	85.1026
HCST	144.01	2.08799	0.122003	17.1142	1.16222e-65	6.17308e-65	2.06564	1.88319	271.458	5.46049e-61	2.9741e-60	2.08138	1.02833	17.8606	2.82525e-51	1.70153e-50	105.788
SPN	227.001	2.32708	0.136048	17.1048	1.36738e-65	7.2519e-65	2.33957	2.55132	266.595	6.26584e-60	3.32025e-59	2.41295	1.48459	16.3663	3.4437e-45	1.67013e-44	91.7809
IGLV3-9	29.9772	5.00942	0.293051	17.094	1.64379e-65	8.69742e-65	5.40871	0.544358	205.567	1.27374e-46	4.9824e-46	3.43368	-3.25148	13.518	7.69846e-34	2.57907e-33	66.019
NTS	30.8997	4.43217	0.259319	17.0916	1.71448e-65	9.0676e-65	6.2113	1.4889	281.224	4.06235e-63	2.31677e-62	2.61498	-3.04077	10.3387	4.64222e-22	1.09521e-21	39.1038
GPR183	308.937	2.51533	0.147316	17.0745	2.29975e-65	1.21346e-64	2.52721	2.98756	264.178	2.10828e-59	1.10445e-58	2.59291	1.744	15.4997	1.08842e-41	4.71093e-41	83.7284
SDCBP2	1722.24	2.24421	0.131459	17.0716	2.41578e-65	1.27386e-64	2.29227	5.43618	284.394	8.28007e-64	4.78367e-63	2.14006	4.41858	16.0371	7.41318e-44	3.4317e-43	88.4713
GLI1	182.188	2.18571	0.128092	17.0636	2.76803e-65	1.45775e-64	2.18937	2.24227	263.681	2.70478e-59	1.41097e-58	2.40378	1.28063	16.9611	1.31917e-47	6.97389e-47	97.3466
CHI3L2	68.4796	2.72054	0.159463	17.0607	2.91234e-65	1.5331e-64	2.0797	0.925154	127.149	1.72299e-29	4.56796e-29	2.36129	-0.573293	13.4691	1.19235e-33	3.97625e-33	65.4669
AP002518.1	13.0112	3.65651	0.214372	17.0569	3.10826e-65	1.63485e-64	3.37959	-1.34072	272.002	4.15507e-61	2.26957e-60	3.29929	-3.04314	18.3691	2.3571e-53	1.5362e-52	110.699
ABHD11-AS1	101.192	2.63493	0.154489	17.0558	3.16402e-65	1.66382e-64	2.59972	1.37042	261.73	7.20145e-59	3.72696e-58	2.05229	0.0312841	10.1416	2.23338e-21	5.16265e-21	37.3494
RP11-469H8.6	43.029	2.84054	0.166594	17.0506	3.45789e-65	1.81605e-64	2.75078	0.158573	255.795	1.41617e-57	7.13282e-57	2.10313	-1.29947	10.4439	1.99551e-22	4.76128e-22	39.8429
AC004988.1	4.96672	3.46702	0.203385	17.0466	3.70279e-65	1.94302e-64	2.84593	-2.40108	212.821	3.33049e-48	1.35064e-47	2.83198	-3.84485	19.5257	4.40348e-58	3.49897e-57	121.531
TNFSF8	51.2702	2.63419	0.154581	17.0409	4.08689e-65	2.14322e-64	2.11814	0.52109	144.546	2.69901e-33	7.82295e-33	2.24802	-0.88081	13.6313	2.78945e-34	9.46627e-34	66.93
HTR1B	11.598	3.21847	0.188919	17.0362	4.42466e-65	2.31938e-64	3.1759	-1.47709	276.466	4.42278e-62	2.46847e-61	2.71063	-3.06481	15.5656	5.91245e-42	2.58108e-41	84.5919
IGHV2-5	88.588	4.44049	0.260778	17.0279	5.10411e-65	2.67215e-64	4.41913	1.22922	228.194	1.47609e-51	6.47918e-51	4.46529	-1.8523	16.0306	7.87469e-44	3.64263e-43	88.8532
FYB	439.319	2.43282	0.143071	17.0043	7.6341e-65	3.98659e-64	2.45525	3.49869	261.734	7.1876e-59	3.72056e-58	2.50365	2.32747	16.1148	3.59413e-44	1.68039e-43	89.3738
IGHV1-2	109.496	4.51581	0.265643	16.9995	8.27599e-65	4.32088e-64	4.48381	1.514	220.013	8.98642e-50	3.7795e-49	4.32623	-1.72978	13.8576	3.64187e-35	1.27028e-34	68.9989
FOXH1	30.4288	3.20125	0.188349	16.9964	8.73445e-65	4.55832e-64	3.32446	-0.0341638	261.349	8.72101e-59	4.50398e-58	2.21976	-1.9548	10.9143	4.34118e-24	1.09039e-23	43.6788
LINC01605	9.94154	3.59605	0.211621	16.9929	9.27258e-65	4.83611e-64	3.50489	-1.67704	282.837	1.80847e-63	1.03829e-62	2.97604	-3.40446	17.9491	1.22934e-51	7.51495e-51	106.768
CNN1	911.654	2.4639	0.145108	16.9798	1.15909e-64	6.03385e-64	3.07073	5.05381	289.616	6.02995e-65	3.57521e-64	2.13548	3.39256	13.0329	5.77512e-32	1.83402e-31	61.2486
ANXA10	1793.35	3.15718	0.186059	16.9687	1.39928e-64	7.2735e-64	3.18913	5.51209	248.689	5.01397e-56	2.43215e-55	2.11659	3.49477	7.35609	1.33873e-12	2.36868e-12	16.9971
RP3-522D1.1	6.16981	3.99822	0.235877	16.9505	1.90943e-64	9.90249e-64	3.7973	-2.28893	321.194	7.95866e-72	5.49865e-71	2.80969	-3.90033	18.9145	1.38789e-55	9.93449e-55	115.81
CD3E	331.214	2.57274	0.151809	16.9472	2.01773e-64	1.04576e-63	2.57404	3.07459	258.958	2.89524e-58	1.47986e-57	2.46023	1.78913	14.7965	7.09975e-39	2.79432e-38	77.2614
HLA-DMB	1243.42	2.11663	0.124902	16.9463	2.05115e-64	1.06286e-63	2.13397	4.98468	263.924	2.3941e-59	1.25075e-58	2.12424	4.10429	17.3997	2.15129e-49	1.21324e-48	101.221
RP1-78O14.1	10.9938	2.82399	0.166646	16.9461	2.05607e-64	1.06519e-63	2.79362	-1.54705	284.671	7.20829e-64	4.16932e-63	2.66234	-2.90265	17.4695	1.11666e-49	6.36541e-49	102.279
OSCAR	158.721	2.2396	0.132162	16.9459	2.06474e-64	1.06945e-63	2.22724	2.03055	261.762	7.08593e-59	3.66946e-58	2.17371	1.02272	15.1197	3.63963e-40	1.49455e-39	80.2856
IGLV9-49	15.3702	4.87932	0.288041	16.9397	2.29343e-64	1.18667e-63	4.18673	-1.10611	181.616	2.15025e-41	7.49687e-41	2.73458	-3.71509	12.3166	3.0672e-29	8.97919e-29	55.5159
RP11-768F21.1	7.20962	2.63979	0.155848	16.9382	2.35271e-64	1.21683e-63	2.59449	-2.08349	314.867	1.90129e-70	1.27701e-69	2.52894	-3.22618	20.0632	2.81417e-60	2.45361e-59	126.558
RP11-1399P15.1	8.36931	3.71481	0.219454	16.9275	2.82178e-64	1.45641e-63	3.15594	-1.86645	210.464	1.08828e-47	4.3642e-47	2.99222	-3.55717	19.6258	1.71792e-58	1.38499e-57	122.468
HLA-DRB5	1861.76	3.20124	0.189137	16.9255	2.9187e-64	1.50612e-63	3.22737	5.57453	244.753	3.61808e-55	1.72009e-54	3.4019	3.4796	14.7993	6.9211e-39	2.72574e-38	77.1889
MILR1	103.83	2.1247	0.125547	16.9236	3.01617e-64	1.55577e-63	2.12136	1.43773	264.075	2.2194e-59	1.16021e-58	2.11792	0.497332	15.7328	1.25498e-42	5.5977e-42	85.9768
AC005339.2	25.4916	2.72069	0.160859	16.9135	3.58066e-64	1.8454e-63	2.55347	-0.545827	274.479	1.19871e-61	6.61889e-61	2.77793	-1.81651	18.1169	2.53302e-52	1.59073e-51	108.319
CSPG5	24.1664	2.35948	0.139519	16.9115	3.70077e-64	1.90691e-63	2.29412	-0.591872	267.325	4.34453e-60	2.31153e-59	2.03808	-1.65008	15.2876	7.74015e-41	3.25039e-40	81.9891
ENTHD1	9.73705	4.53121	0.267963	16.9098	3.80972e-64	1.96223e-63	4.465	-1.6763	280.475	5.91623e-63	3.36169e-62	3.03094	-3.83434	16.4331	1.84489e-45	9.02669e-45	92.6277
GREM2	85.4485	3.32073	0.196526	16.8971	4.72247e-64	2.42933e-63	3.3	1.17798	241.266	2.08337e-54	9.7113e-54	2.35405	-0.949644	11.2797	2.09931e-25	5.47736e-25	46.6221
RP11-345J18.2	12.1238	2.24207	0.132743	16.8903	5.30463e-64	2.72654e-63	2.19495	-1.44372	282.749	1.89017e-63	1.0847e-62	2.45966	-2.47845	18.3737	2.25811e-53	1.47362e-52	110.737
CHCHD3P3	3.09869	2.80684	0.166509	16.857	9.32652e-64	4.76909e-63	2.74687	-2.91256	400.153	5.10172e-89	5.27836e-88	2.33684	-3.93827	20.4918	5.03997e-62	4.75304e-61	130.555
NOTUM	45.3686	2.46784	0.146642	16.829	1.49561e-63	7.62265e-63	3.46989	1.16215	296.59	1.82311e-66	1.11749e-65	2.15657	-0.879541	12.7663	6.06177e-31	1.86518e-30	59.2888
ITGB2	2407.76	2.29795	0.136572	16.8259	1.57543e-63	8.02614e-63	2.31466	5.93717	256.407	1.04156e-57	5.25991e-57	2.47342	4.86302	18.7785	4.99259e-55	3.47843e-54	114.152
CD300A	272.589	2.0909	0.124295	16.8222	1.67939e-63	8.55052e-63	2.10008	2.80621	261.605	7.66968e-59	3.9668e-58	2.32204	1.92509	19.8782	1.60028e-59	1.35204e-58	124.673
MSR1	700.911	2.27795	0.135446	16.8181	1.79687e-63	9.13369e-63	2.30399	4.17263	256.475	1.0066e-57	5.08646e-57	2.20325	3.12378	14.8435	4.61622e-39	1.83078e-38	77.5633
DUOXA2	1250.84	4.87188	0.289727	16.8154	1.88266e-63	9.56587e-63	4.84731	4.98124	206.34	8.6365e-47	3.39324e-46	6.80175	0.652838	15.4735	1.38823e-41	5.97833e-41	83.6276
LILRB4	302.468	2.48379	0.147769	16.8087	2.10847e-63	1.07066e-62	2.48488	2.95444	254.287	3.01962e-57	1.50744e-56	2.73168	1.7102	16.9073	2.18367e-47	1.14466e-46	96.8176
RP11-1223D19.3	9.14204	3.13457	0.186652	16.7937	2.71434e-63	1.37522e-62	2.93351	-1.73467	255.128	1.97948e-57	9.93378e-57	2.89311	-3.19899	16.8908	2.5496e-47	1.33339e-46	96.8801
RP11-1166P10.1	8.74919	2.70489	0.161077	16.7925	2.76841e-63	1.40233e-62	2.58328	-1.79894	281.19	4.13212e-63	2.35602e-62	2.47967	-2.99665	16.9715	1.19607e-47	6.33523e-47	97.631
MYCN	28.3786	2.55467	0.1524	16.7629	4.55982e-63	2.30132e-62	2.51058	-0.35376	256.045	1.24947e-57	6.30219e-57	2.29677	-1.63101	15.1717	2.25365e-40	9.31586e-40	80.9247
LTA	13.5681	2.94653	0.175805	16.7601	4.77471e-63	2.40831e-62	2.2688	-1.24184	138.189	6.6245e-32	1.85952e-31	2.49974	-2.75495	15.666	2.33133e-42	1.03042e-41	85.5106
RP11-41O4.2	4.36104	4.0387	0.241659	16.7124	1.06538e-62	5.3508e-62	4.12966	-2.57507	302.603	8.92832e-68	5.63689e-67	2.4898	-4.20047	15.2668	9.3725e-41	3.92526e-40	81.8611
IGLV1-44	271.086	4.12897	0.247193	16.7034	1.23761e-62	6.20705e-62	4.11221	2.8041	218.551	1.87245e-49	7.82344e-49	4.79197	-0.332358	14.2517	1.0275e-36	3.7737e-36	72.4829
TNFRSF8	27.3696	2.27847	0.136445	16.6989	1.33611e-62	6.69701e-62	2.23717	-0.394544	260.848	1.1214e-58	5.78067e-58	2.45815	-1.47657	18.5313	5.12114e-54	3.42573e-53	112.195
AC017002.1	8.97563	2.63916	0.158155	16.6872	1.62334e-62	8.12685e-62	2.57416	-1.79635	288.009	1.35007e-64	7.94207e-64	2.85198	-3.03887	20.5778	2.25162e-62	2.15287e-61	131.362
CTD-2510F5.4	2.61124	3.34164	0.200556	16.6619	2.48049e-62	1.23731e-61	3.48675	-3.04959	332.297	3.03667e-74	2.20801e-73	2.25511	-4.3595	17.0843	4.15479e-48	2.23017e-47	98.6941
IGHV2-70	15.975	5.29316	0.31783	16.6541	2.82588e-62	1.4079e-61	5.1398	-1.0657	229.429	7.9408e-52	3.50352e-51	2.81877	-3.86642	12.2805	4.19474e-29	1.22282e-28	55.2075
IGLV7-46	64.3086	4.05505	0.243739	16.6368	3.76954e-62	1.87465e-61	4.03469	0.779941	220.803	6.04136e-50	2.54951e-49	3.79332	-1.97396	14.3266	5.19612e-37	1.92488e-36	73.2354
RP11-1029J19.4	5.1025	4.04466	0.243279	16.6256	4.54533e-62	2.2573e-61	3.99744	-2.45409	287.672	1.59896e-64	9.38848e-64	2.47267	-4.1361	15.1153	3.78993e-40	1.55602e-39	80.4719
OACYLP	3.97431	3.18703	0.191802	16.6162	5.31636e-62	2.63442e-61	3.1378	-2.66065	344.589	6.39116e-77	4.94389e-76	2.59924	-3.93009	20.453	7.25685e-62	6.79467e-61	130.193
SNX20	152.405	2.34115	0.140933	16.6118	5.72157e-62	2.83069e-61	2.33084	1.97545	251.095	1.49881e-56	7.36239e-56	2.49567	0.853381	17.393	2.29169e-49	1.29065e-48	101.421
RP11-150O12.6	7.81692	3.74193	0.225324	16.6069	6.21374e-62	3.07174e-61	3.59348	-2.00476	282.631	2.00583e-63	1.14974e-62	2.6187	-3.69789	16.7212	1.24845e-46	6.35383e-46	95.3058
IGHV3-7	145.425	4.03755	0.243254	16.5981	7.191e-62	3.54849e-61	4.022	1.92423	224.174	1.1115e-50	4.77006e-50	4.21308	-0.976048	13.3608	3.13698e-33	1.03432e-32	64.5313
RP11-285E9.6	2.89911	3.88911	0.234395	16.5921	7.94371e-62	3.91603e-61	4.4122	-2.97442	329.812	1.05609e-73	7.5967e-73	2.24491	-4.50718	15.3781	3.35463e-41	1.42635e-40	82.886
BMP7	172.249	3.00971	0.181403	16.5913	8.05224e-62	3.96795e-61	2.9953	2.13132	239.863	4.21196e-54	1.94871e-53	3.17812	0.279086	15.2816	8.18026e-41	3.43231e-40	81.8378
SLITRK3	18.3717	2.98751	0.180083	16.5896	8.28296e-62	4.07922e-61	2.96355	-0.897468	250.23	2.31378e-56	1.13209e-55	2.74366	-2.49379	15.0993	4.39395e-40	1.80073e-39	80.2921
XKR5	3.66459	3.72449	0.224634	16.5803	9.68075e-62	4.76005e-61	3.78597	-2.72675	315.772	1.20763e-70	8.13531e-70	2.56496	-4.22789	17.8122	4.45382e-51	2.66232e-50	105.492
PIWIL1	19.8731	4.44494	0.268344	16.5643	1.26167e-61	6.19262e-61	4.35988	-0.848452	229.874	6.34931e-52	2.81083e-51	2.34493	-3.51423	9.82112	2.77088e-20	6.18738e-20	35.0751
TRPA1	32.5352	2.79514	0.168895	16.5496	1.61275e-61	7.89245e-61	3.0262	0.0974879	257.86	5.02242e-58	2.55347e-57	2.01002	-1.57464	11.7453	4.14408e-27	1.13666e-26	50.5576
RP11-834C11.14	13.4891	3.20141	0.193493	16.5454	1.72944e-61	8.45849e-61	3.02632	-1.31675	251.645	1.13709e-56	5.59552e-56	2.97196	-2.87976	16.4534	1.52739e-45	7.49389e-45	92.8038
ACAN	84.2482	2.35954	0.142732	16.5312	2.18578e-61	1.06736e-60	2.34974	1.13741	252.615	6.98743e-57	3.46179e-56	2.53071	-0.0376201	15.7111	1.53492e-42	6.82793e-42	85.814
TREM2	332.999	2.46951	0.149393	16.5303	2.21983e-61	1.08377e-60	2.45579	3.0852	244.751	3.62092e-55	1.72112e-54	2.84064	1.83331	17.2008	1.39268e-48	7.61037e-48	99.5566
HMGN2P17	2.89023	3.41063	0.206931	16.482	4.94221e-61	2.39594e-60	3.50908	-2.9724	357.941	7.90468e-80	6.55801e-79	2.6231	-4.29585	22.1235	1.22437e-68	1.52775e-67	145.695
IGLV3-25	195.369	4.40262	0.267151	16.4799	5.11598e-61	2.4797e-60	4.40205	2.34463	207.893	3.95889e-47	1.56984e-46	4.94117	-1.1087	15.6986	1.72407e-42	7.66111e-42	85.7556
TPRXL	14.5108	3.48973	0.21177	16.4788	5.20867e-61	2.52364e-60	3.38663	-1.22418	243.328	7.39679e-55	3.48784e-54	2.28448	-3.10804	12.7656	6.09501e-31	1.87517e-30	59.3926
LST1	241.878	2.12931	0.129368	16.4593	7.18703e-61	3.47268e-60	2.12533	2.62424	249.813	2.85292e-56	1.39204e-55	2.28141	1.69918	17.7448	8.39624e-51	4.96871e-50	104.653
KLRB1	73.2105	2.68668	0.163263	16.4562	7.57461e-61	3.65853e-60	2.66149	0.947806	239.918	4.09758e-54	1.89685e-53	3.04634	-0.546044	18.6205	2.21075e-54	1.49987e-53	113.006
BMP3	26.4035	3.22186	0.195906	16.4459	8.96758e-61	4.32209e-60	3.17447	-0.432252	234.413	6.49973e-53	2.94087e-52	2.65499	-2.29797	13.75	9.5944e-35	3.31071e-34	68.0609
IGHV3-66	19.2494	4.57633	0.278361	16.4403	9.8461e-61	4.74367e-60	4.46929	-0.824002	225.096	6.99482e-51	3.01752e-50	3.0763	-3.46551	13.2898	5.90715e-33	1.92899e-32	64.0023
PTPN7	210.49	2.18636	0.133105	16.4258	1.24925e-60	6.00467e-60	2.18567	2.43168	248.221	6.34236e-56	3.06634e-55	2.11147	1.45132	15.4502	1.7211e-41	7.38495e-41	83.2869
LSP1	1328.16	2.10167	0.128219	16.3913	2.20794e-60	1.05596e-59	2.1088	5.06958	248.063	6.8674e-56	3.3176e-55	2.14408	4.17154	17.6192	2.73493e-50	1.59341e-49	103.276
CLEC17A	18.0708	4.09747	0.250012	16.3891	2.2886e-60	1.09411e-59	2.14724	-0.775791	54.5076	1.54844e-13	2.75939e-13	2.41319	-3.32748	11.0975	9.55657e-25	2.44664e-24	45.245
C5orf46	58.969	3.36085	0.205173	16.3806	2.63349e-60	1.2573e-59	3.30375	0.628525	226.347	3.73272e-51	1.61984e-50	3.83396	-1.52546	17.205	1.33883e-48	7.3226e-48	99.7756
IGHV3-43	35.6983	4.80162	0.293313	16.3703	3.11535e-60	1.48535e-59	4.72448	-0.0302426	208.475	2.95591e-47	1.17512e-46	3.8983	-3.0493	15.5325	8.03633e-42	3.49291e-41	84.2808
BPI	15.6498	2.94236	0.179781	16.3664	3.3251e-60	1.58506e-59	2.93041	-1.10337	251.85	1.02573e-56	5.05655e-56	2.83048	-2.67018	18.0885	3.31069e-52	2.07073e-51	108.067
ZPLD1	36.5621	3.52687	0.215932	16.3333	5.72205e-60	2.71775e-59	3.51529	0.0204284	228.16	1.50151e-51	6.58962e-51	3.53082	-2.23246	16.3321	4.7385e-45	2.28825e-44	91.6618
GUCY1B2	18.209	3.49977	0.214282	16.3325	5.79138e-60	2.74963e-59	3.44844	-0.930564	237.045	1.73405e-53	7.92676e-53	3.0506	-2.87457	14.0266	7.90686e-36	2.81525e-35	70.5615
CYP1B1	1241.63	2.34418	0.143676	16.3158	7.62227e-60	3.61269e-59	2.36913	4.99449	240.858	2.55663e-54	1.18906e-53	2.13194	3.85187	12.8611	2.63212e-31	8.18308e-31	59.7015
C2orf61	8.64615	3.62472	0.222247	16.3095	8.45307e-60	4.00569e-59	3.55955	-1.83855	263.556	2.88042e-59	1.50102e-58	2.44856	-3.57543	12.2781	4.28309e-29	1.24799e-28	55.1837
IGHV3-49	54.1955	4.10916	0.252366	16.2826	1.31223e-59	6.20647e-59	4.08901	0.544057	212.643	3.64149e-48	1.47483e-47	4.08832	-2.24818	15.497	1.11691e-41	4.82919e-41	83.9352
ARL11	51.9316	2.20313	0.135307	16.2824	1.31499e-59	6.21835e-59	2.17936	0.472684	246.537	1.477e-55	7.09114e-55	2.47193	-0.593602	18.8702	2.10462e-55	1.49356e-54	115.35
KRT79	9.24116	3.47298	0.213726	16.2497	2.24628e-59	1.05879e-58	2.25117	-1.67107	89.3647	3.28348e-21	7.13878e-21	2.76146	-3.45056	15.9234	2.13463e-43	9.76509e-43	87.9006
IGLV8-61	70.2111	4.24106	0.261019	16.2481	2.30349e-59	1.08556e-58	4.23667	0.914031	207.276	5.3961e-47	2.12988e-46	3.37153	-2.16641	11.3908	8.28221e-26	2.18782e-25	47.6166
LAIR2	7.20522	4.24265	0.261125	16.2476	2.32314e-59	1.09461e-58	4.10042	-2.05336	259.808	1.88919e-58	9.68823e-58	3.02607	-3.93774	18.1249	2.35029e-52	1.47897e-51	108.416
RAB42	70.598	2.22536	0.136976	16.2463	2.37093e-59	1.11691e-58	2.20562	0.902887	241.905	1.51142e-54	7.06779e-54	2.56311	-0.179887	18.9872	6.99893e-56	5.06382e-55	116.433
C7orf57	9.742	4.00392	0.246517	16.242	2.54681e-59	1.19931e-58	3.94558	-1.6763	251.731	1.08922e-56	5.36527e-56	2.26145	-3.78749	12.1591	1.19727e-28	3.44489e-28	54.1693
IGKV1-8	210.234	4.63759	0.285711	16.2317	3.00787e-59	1.41482e-58	4.61774	2.44682	199.96	2.1308e-45	8.1088e-45	4.98483	-1.08214	14.4621	1.51268e-37	5.72845e-37	74.4262
IGKV2D-29	46.1481	4.5697	0.281537	16.2312	3.03253e-59	1.42615e-58	4.00023	0.338052	153.721	2.66489e-35	8.09541e-35	3.77551	-2.74762	14.0205	8.35755e-36	2.97273e-35	70.4994
DCSTAMP	21.6919	3.13532	0.193296	16.2203	3.62432e-59	1.70092e-58	2.30338	-0.597506	102.86	3.59655e-24	8.42271e-24	3.62432	-2.45316	20.1478	1.27202e-60	1.12685e-59	127.349
MSMB	69.6479	4.48109	0.276329	16.2165	3.85651e-59	1.80852e-58	5.14831	1.5559	226.565	3.34614e-51	1.45386e-50	2.64127	-2.43402	8.52891	4.41192e-16	8.69119e-16	25.4615
BCL2A1	123.882	2.78969	0.172036	16.2157	3.90572e-59	1.83125e-58	2.76069	1.67669	232.621	1.59892e-52	7.17306e-52	3.57997	0.0312308	20.4638	6.55693e-62	6.15093e-61	130.266
IGHV3-53	29.8905	4.37354	0.26978	16.2115	4.18231e-59	1.95834e-58	4.32254	-0.267331	213.73	2.10956e-48	8.60281e-48	3.88091	-2.93568	15.8556	4.00938e-43	1.81939e-42	87.2609
IGLV4-69	63.3142	4.12811	0.254706	16.2073	4.47538e-59	2.09478e-58	4.10176	0.751472	209.171	2.08358e-47	8.30322e-47	4.07948	-2.07209	15.1023	4.27427e-40	1.75226e-39	80.304
FCGR1A	187.507	2.10701	0.130033	16.2037	4.75036e-59	2.22307e-58	2.10162	2.26784	241.219	2.13279e-54	9.9398e-54	2.14626	1.3238	15.2616	9.83405e-41	4.11509e-40	81.562
MMP10	121.884	3.69055	0.227849	16.1974	5.26405e-59	2.46254e-58	3.01042	1.72062	131.715	1.72753e-30	4.69632e-30	4.69759	-0.966453	18.6543	1.60851e-54	1.09697e-53	113.338
LINC00520	7.24648	4.54702	0.280884	16.1882	6.10579e-59	2.85362e-58	4.52446	-2.03442	250.87	1.67785e-56	8.23537e-56	2.62679	-4.13687	13.5738	4.67198e-34	1.57622e-33	66.5366
LDHAP7	4.11393	3.82416	0.236242	16.1874	6.18541e-59	2.8892e-58	3.85956	-2.62334	286.76	2.52682e-64	1.47736e-63	2.56218	-4.17909	16.436	1.79644e-45	8.79311e-45	92.6584
RP11-44F21.5	22.2553	3.36003	0.207681	16.1788	7.11326e-59	3.31761e-58	3.3163	-0.690279	232.51	1.69057e-52	7.57737e-52	2.97096	-2.60176	12.9122	1.6776e-31	5.25036e-31	60.653
IGHV3-73	37.0485	4.23261	0.261678	16.1749	7.58326e-59	3.53416e-58	4.20138	0.0299689	211.178	7.60062e-48	3.05934e-47	3.50497	-2.75606	14.2352	1.19382e-36	4.37482e-36	72.4357
WI2-87327B8.2	5.80783	3.48497	0.215823	16.1473	1.1862e-58	5.50654e-58	3.40326	-2.27151	282.923	1.73252e-63	9.95377e-63	2.60202	-3.8102	16.2657	8.81082e-45	4.20734e-44	91.0744
CACNA2D3	37.9237	2.29323	0.142046	16.1443	1.24571e-58	5.77956e-58	2.55059	0.27857	248.289	6.13111e-56	2.96709e-55	2.02656	-1.05109	14.3756	3.32846e-37	1.24397e-36	73.6359
RPL12P38	4.53454	2.92273	0.181262	16.1243	1.72064e-58	7.96369e-58	2.81936	-2.56052	319.798	1.60321e-71	1.10122e-70	2.63088	-3.73438	22.4661	5.11237e-70	6.82869e-69	148.859
GZMK	119.983	3.00407	0.186423	16.1143	2.02527e-58	9.35793e-58	2.98057	1.6395	228.825	1.07568e-51	4.73333e-51	3.31639	-0.231209	16.4985	1.00148e-45	4.94584e-45	93.1336
HTR2A	12.147	2.76414	0.171556	16.1122	2.09362e-58	9.67015e-58	2.7273	-1.41775	247.343	9.85848e-56	4.75147e-55	2.59721	-2.83046	16.3034	6.19361e-45	2.97703e-44	91.4111
HIST1H4H	16.001	2.64315	0.164133	16.1038	2.40086e-58	1.10748e-57	2.61527	-1.08748	245.012	3.17662e-55	1.51253e-54	2.56494	-2.44216	15.8454	4.40835e-43	1.99606e-42	87.1586
ZNF695	8.27567	3.28144	0.203829	16.099	2.59179e-58	1.19489e-57	3.14072	-1.92212	260.096	1.63524e-58	8.40328e-58	2.35047	-3.47113	13.3511	3.42066e-33	1.12606e-32	64.5496
ALOX5AP	794.705	2.08463	0.12954	16.0926	2.87567e-58	1.3238e-57	2.09603	4.34034	238.058	1.04264e-53	4.78467e-53	2.10532	3.42049	15.8403	4.62195e-43	2.09163e-42	86.7203
MUC5B	8080.88	3.53935	0.220022	16.0864	3.17989e-58	1.46249e-57	3.57502	7.69531	214.606	1.35807e-48	5.55922e-48	3.32566	4.98365	11.2917	1.89768e-25	4.9596e-25	46.2661
TFAP2A-AS1	8.87708	2.86278	0.178056	16.078	3.64189e-58	1.67342e-57	2.77127	-1.82352	254.803	2.33014e-57	1.167e-56	2.6034	-3.19877	16.3715	3.28154e-45	1.59242e-44	92.0495
ODF3L1	14.8653	2.46649	0.153898	16.0268	8.30864e-58	3.78832e-57	2.43511	-1.20726	250.719	1.8098e-56	8.87072e-56	2.3541	-2.41038	16.3506	3.98845e-45	1.92942e-44	91.8391
RSPO2	9.06916	4.06139	0.253795	16.0026	1.22495e-57	5.57082e-57	4.69237	-1.15394	257.853	5.04115e-58	2.56247e-57	2.54786	-3.74749	13.1957	1.36465e-32	4.4076e-32	63.1799
IGHV4-34	73.2554	4.22904	0.264391	15.9954	1.37604e-57	6.24995e-57	3.65965	0.985898	144.678	2.52587e-33	7.32366e-33	4.37826	-2.08534	15.8316	5.01309e-43	2.26657e-42	87.018
YWHAZP2	2.95423	2.9066	0.181825	15.9857	1.60727e-57	7.29087e-57	2.87047	-2.92401	335.328	6.64286e-75	4.90481e-74	2.37615	-4.09741	19.2759	4.6197e-57	3.51231e-56	119.193
KERA	10.179	3.90235	0.244275	15.9752	1.90134e-57	8.61067e-57	3.81225	-1.63071	257.144	7.19454e-58	3.65034e-57	3.80254	-3.5186	23.7773	2.92157e-75	5.03438e-74	160.873
FAM163A	26.5792	3.11876	0.195337	15.966	2.20358e-57	9.9667e-57	3.52862	0.209323	213.067	2.94264e-48	1.19589e-47	2.44184	-2.24494	12.8841	2.14949e-31	6.7019e-31	60.3923
ARHGAP15	163.838	2.20142	0.137928	15.9607	2.40046e-57	1.08473e-56	2.19239	2.07349	233.971	8.11537e-53	3.66653e-52	2.29506	1.03895	17.4479	1.36786e-49	7.76526e-49	101.92
RXFP4	8.79311	3.23773	0.203129	15.9392	3.38414e-57	1.52535e-56	3.13707	-1.85427	247.543	8.91537e-56	4.29943e-55	2.22985	-3.4211	12.7276	8.51511e-31	2.60489e-30	59.0702
IGLV7-43	40.7936	4.02899	0.252824	15.9359	3.56823e-57	1.60658e-56	3.99516	0.163039	206.129	9.60216e-47	3.76547e-46	3.64318	-2.50963	14.5853	4.91209e-38	1.88899e-37	75.6003
HLA-DRB6	266.269	3.1815	0.200033	15.9049	5.85854e-57	2.62635e-56	3.15988	2.76107	214.662	1.32075e-48	5.40825e-48	4.58213	0.621412	19.0449	4.06564e-56	2.97273e-55	116.953
SCT	9.22666	3.2068	0.201751	15.8948	6.88638e-57	3.08156e-56	3.13874	-1.78083	253.466	4.55791e-57	2.26854e-56	2.81911	-3.36478	16.7593	8.73321e-47	4.47122e-46	95.6575
RP11-281P23.1	6.23685	3.32538	0.209471	15.8751	9.41881e-57	4.2072e-56	3.2342	-2.20952	267.387	4.21113e-60	2.24151e-59	2.48584	-3.71253	15.4812	1.29169e-41	5.56937e-41	83.826
CCR8	7.01597	3.77976	0.238452	15.8512	1.37833e-56	6.14348e-56	3.70368	-2.04071	262.053	6.12245e-59	3.17516e-58	3.1075	-3.79892	18.9006	1.58091e-55	1.12609e-54	115.68
IGKV3D-11	10.712	4.66774	0.294737	15.837	1.72931e-56	7.68718e-56	4.56592	-1.57013	233.814	8.78397e-53	3.96428e-52	3.01756	-3.85904	14.8666	3.73175e-39	1.48356e-38	78.1931
RP11-667K14.4	27.3797	4.44476	0.280742	15.8322	1.86632e-56	8.29325e-56	4.66063	-0.177797	208.96	2.3157e-47	9.2164e-47	4.66854	-2.90239	21.2479	4.25816e-65	4.54576e-64	137.604
HOXC5	12.641	2.96121	0.187196	15.8188	2.30974e-56	1.02435e-55	2.80532	-1.37385	222.529	2.53973e-50	1.08209e-49	2.96175	-2.88857	17.0912	3.89559e-48	2.09375e-47	98.7444
RP11-320G24.1	6.81778	4.14038	0.262018	15.8019	3.01979e-56	1.33567e-55	4.11041	-2.06961	252.185	8.67028e-57	4.28186e-56	2.48325	-4.07282	14.7322	1.28001e-38	4.9959e-38	76.9734
TESPA1	64.6822	2.44245	0.154575	15.8011	3.05915e-56	1.35283e-55	2.41914	0.770006	227.123	2.52792e-51	1.10221e-50	2.38516	-0.521216	15.9378	1.86734e-43	8.55339e-43	87.938
VNN2	263.993	2.34609	0.148482	15.8005	3.08664e-56	1.36426e-55	2.36153	2.76612	229.062	9.54549e-52	4.20479e-51	2.14029	1.56199	11.5246	2.68708e-26	7.19927e-26	48.4444
CTD-2196E14.8	7.2936	3.95127	0.250122	15.7974	3.24401e-56	1.43305e-55	3.87243	-2.04335	249.815	2.84978e-56	1.39078e-55	2.70932	-3.85709	14.7926	7.36224e-39	2.89626e-38	77.5192
CDCA7	435.68	2.41451	0.15286	15.7956	3.33807e-56	1.47408e-55	2.4514	3.47563	232.878	1.40494e-52	6.30964e-52	2.22552	2.1813	10.9826	2.4726e-24	6.25289e-24	43.8862
RP5-1172A22.1	9.24442	3.00192	0.190066	15.7941	3.41391e-56	1.5065e-55	2.94786	-1.76144	254.566	2.62476e-57	1.31243e-56	3.14607	-3.26044	20.765	3.89661e-63	3.84565e-62	133.106
LCP1	2382.11	2.21743	0.140397	15.794	3.42318e-56	1.51032e-55	2.23467	5.91587	229.686	6.9799e-52	3.08395e-51	2.29201	4.8369	18.0056	7.22095e-52	4.46028e-51	106.877
IGHA2	4169.91	3.31754	0.210228	15.7807	4.22604e-56	1.86157e-55	3.34401	6.73807	209.708	1.59079e-47	6.35267e-47	3.3863	4.2923	12.5859	2.94295e-30	8.85237e-30	57.3346
MCHR1	7.37338	3.01792	0.19143	15.7651	5.40627e-56	2.37767e-55	2.93507	-2.02497	256.704	8.9718e-58	4.54256e-57	2.8515	-3.48334	18.9396	1.0954e-55	7.8635e-55	116.045
GPR19	16.1047	2.11059	0.133964	15.7549	6.3584e-56	2.79344e-55	2.06302	-1.08274	236.702	2.05948e-53	9.39708e-53	2.10569	-2.06353	16.48	1.19094e-45	5.86636e-45	93.0322
LILRA4	19.816	3.63731	0.230887	15.7536	6.48708e-56	2.84897e-55	2.19673	-0.678055	67.7577	1.84869e-16	3.55631e-16	3.331	-2.89984	16.8024	5.83491e-47	3.00595e-46	96.051
OR7E22P	10.4674	3.44591	0.219234	15.718	1.13868e-55	4.98406e-55	3.38876	-1.62212	235.108	4.58587e-53	2.08061e-52	2.19224	-3.42896	10.7601	1.5369e-23	3.79879e-23	42.4964
AC009014.3	78.9354	3.09027	0.196618	15.7172	1.15392e-55	5.04898e-55	4.02185	1.92952	259.957	1.75341e-58	9.00125e-58	2.14986	-0.903146	9.38981	7.65175e-19	1.64048e-18	31.6419
AC061992.2	2.85949	3.02034	0.192474	15.6922	1.71099e-55	7.46147e-55	2.99592	-2.97263	309.739	2.48913e-69	1.63339e-68	2.30599	-4.20761	18.4028	1.71777e-53	1.12692e-52	111.019
P2RY14	37.0545	2.40303	0.153183	15.6873	1.8475e-55	8.04831e-55	2.38057	0.0227786	225.595	5.44519e-51	2.35352e-50	2.25085	-1.23653	14.4058	2.52787e-37	9.48754e-37	73.9191
TMEM82	8.59587	4.06298	0.259021	15.6859	1.88844e-55	8.2252e-55	3.9303	-1.83344	227.196	2.43699e-51	1.06294e-50	2.37617	-3.87701	11.9568	6.81515e-28	1.9165e-27	52.4446
CCDC89	10.6411	2.07963	0.132705	15.6711	2.38591e-55	1.03738e-54	2.04927	-1.59394	242.741	9.93431e-55	4.66488e-54	2.19172	-2.57573	17.3082	5.08289e-49	2.82546e-48	100.766
RP11-334L9.1	3.91015	2.5222	0.161043	15.6616	2.76694e-55	1.20178e-54	2.46591	-2.71676	306.305	1.39343e-68	8.97775e-68	2.34137	-3.77124	19.6598	1.24799e-58	1.01403e-57	122.785
AC007879.7	8.35913	2.88504	0.184476	15.6391	3.94064e-55	1.70381e-54	2.7917	-1.87509	244.149	4.89882e-55	2.3232e-54	2.59028	-3.27791	16.4033	2.43865e-45	1.18803e-44	92.346
RP11-544O24.2	6.89256	2.33736	0.149484	15.6362	4.12871e-55	1.78482e-54	2.20313	-2.06137	238.85	7.00413e-54	3.22432e-53	2.31875	-3.13887	15.4593	1.58245e-41	6.80295e-41	83.6156
CPHL1P	16.616	3.94866	0.252746	15.623	5.0754e-55	2.1914e-54	4.67123	-0.354791	234.126	7.50844e-53	3.39418e-52	2.26589	-3.43453	10.4224	2.37298e-22	5.64724e-22	39.7849
REN	8.04185	3.44113	0.220453	15.6094	6.28632e-55	2.70952e-54	3.78763	-1.59732	249.415	3.48361e-56	1.69611e-55	2.32515	-3.62241	12.8978	1.90439e-31	5.94967e-31	60.5613
IGLV3-27	17.3114	5.05936	0.324231	15.6042	6.81853e-55	2.9384e-54	4.96385	-0.959688	202.611	5.62572e-46	2.16981e-45	2.83761	-3.88546	12.3231	2.89907e-29	8.49302e-29	55.5744
TMIGD2	11.3307	2.59146	0.166087	15.603	6.94094e-55	2.99064e-54	2.54658	-1.52942	241.551	1.8056e-54	8.42285e-54	2.74958	-2.84938	19.7076	7.95487e-59	6.52552e-58	123.234
CHRNB4	9.022	2.30511	0.147798	15.5964	7.70059e-55	3.31335e-54	2.2836	-1.78014	248.411	5.765e-56	2.79209e-55	2.35379	-2.89396	17.4328	1.57685e-49	8.93739e-49	101.936
CCDC33	9.10665	4.13553	0.265255	15.5908	8.40561e-55	3.61607e-54	4.29574	-1.56831	235.734	3.3489e-53	1.52246e-52	2.6104	-3.87683	14.279	8.01618e-37	2.9537e-36	72.8591
C1QC	2429.45	2.04321	0.131165	15.5773	1.0383e-54	4.46057e-54	2.06111	5.94844	224.876	7.81386e-51	3.36734e-50	2.07747	5.00383	15.9076	2.47449e-43	1.13032e-42	87.2395
TNIP3	7.42591	3.18575	0.204619	15.5691	1.17965e-54	5.06341e-54	3.1374	-1.9895	253.833	3.79138e-57	1.89006e-56	2.96179	-3.55027	19.6735	1.09707e-58	8.93742e-58	122.914
NUGGC	18.8317	2.71601	0.174554	15.5597	1.36802e-54	5.86792e-54	2.06481	-0.802901	111.915	3.73005e-26	9.15136e-26	2.32331	-2.34932	13.5404	6.30142e-34	2.11876e-33	66.1926
SMCO2	8.78946	2.42975	0.156191	15.5563	1.44227e-54	6.18212e-54	2.36579	-1.83622	246.334	1.63526e-55	7.83885e-55	2.45075	-3.00033	17.2154	1.2147e-48	6.65098e-48	99.9061
RP11-347C12.4	6.6895	3.15477	0.202973	15.5428	1.77953e-54	7.61327e-54	2.60721	-2.1129	230.799	3.99097e-52	1.77534e-51	2.02214	-3.35297	13.2518	8.28537e-33	2.69109e-32	63.6694
RP11-359E10.1	31.6233	2.38271	0.153316	15.5412	1.82545e-54	7.80703e-54	2.33068	-0.208168	219.822	9.88956e-50	4.15582e-49	2.10166	-1.4378	13.5952	3.85681e-34	1.30475e-33	66.638
IGLC7	74.8162	4.64289	0.298748	15.5412	1.82668e-54	7.81096e-54	4.6075	0.963857	185.941	2.44611e-42	8.70692e-42	4.15405	-2.48249	14.3491	4.23632e-37	1.57709e-36	73.4547
LINC00519	3.75089	3.20174	0.206413	15.5113	2.90702e-54	1.23879e-53	3.12667	-2.72063	289.786	5.5372e-65	3.28698e-64	2.57868	-4.06774	19.6203	1.8089e-58	1.45692e-57	122.415
CHRDL2	146.601	3.15522	0.203604	15.4968	3.64584e-54	1.55176e-53	3.15083	1.91937	206.132	9.59062e-47	3.76157e-46	2.21171	-0.27349	9.29042	1.62392e-18	3.44675e-18	30.8488
CTB-133G6.1	12.651	3.68229	0.237971	15.4737	5.22041e-54	2.21435e-53	2.03717	-1.22524	56.8861	4.61804e-14	8.34574e-14	2.10683	-3.43394	10.3549	4.07776e-22	9.63139e-22	39.2499
EGR4	20.1551	2.71243	0.175429	15.4617	6.29375e-54	2.66644e-53	2.65194	-0.807956	217.147	3.79136e-49	1.57351e-48	2.32854	-2.28174	12.8071	4.23422e-31	1.30836e-30	59.7205
UTS2	6.26224	4.16556	0.269652	15.4479	7.79274e-54	3.29532e-53	3.17834	-2.19791	133.526	6.93649e-31	1.90531e-30	2.40719	-4.12735	13.5836	4.27838e-34	1.44539e-33	66.6253
RP11-452D2.2	1.86739	3.0173	0.195328	15.4474	7.86089e-54	3.32301e-53	3.26188	-3.30163	304.091	4.23092e-68	2.69241e-67	2.03322	-4.53647	17.1538	2.16389e-48	1.17318e-47	99.3437
RP11-400G3.5	36.569	3.97593	0.257505	15.4402	8.78358e-54	3.70864e-53	3.89754	0.0113536	195.913	1.62825e-44	6.07894e-44	3.60826	-2.51956	14.0194	8.43892e-36	3.00038e-35	70.484
AC079767.4	11.7565	4.10639	0.265978	15.4388	8.97508e-54	3.78885e-53	2.20426	-1.32301	50.784	1.03112e-12	1.79272e-12	3.33398	-3.61068	18.2514	7.14347e-53	4.58463e-52	109.599
IGLON5	25.1295	2.4678	0.159861	15.4371	9.20982e-54	3.88729e-53	2.39625	-0.517726	214.912	1.16489e-48	4.77631e-48	2.24331	-1.81343	13.5767	4.55145e-34	1.53618e-33	66.4919
GPR78	12.1734	2.69071	0.174319	15.4356	9.43187e-54	3.97966e-53	2.50475	-1.41953	217.107	3.86704e-49	1.60465e-48	2.47538	-2.74117	15.7169	1.45451e-42	6.47604e-42	85.9795
RP11-672A2.4	8.83454	2.20152	0.142645	15.4336	9.73418e-54	4.10512e-53	2.18303	-1.80567	238.761	7.32627e-54	3.37136e-53	2.29155	-2.89354	15.6654	2.34555e-42	1.03634e-41	85.5084
AC021066.1	16.7563	3.87948	0.251508	15.4249	1.11378e-53	4.68593e-53	3.54964	-1.01526	210.325	1.16673e-47	4.67426e-47	2.30888	-3.08075	9.74633	4.95573e-20	1.0992e-19	34.4835
AC011294.3	6.62312	3.86883	0.250864	15.422	1.1645e-53	4.89849e-53	3.76559	-2.14917	238.642	7.77687e-54	3.5754e-53	2.35844	-3.97819	13.1347	2.34409e-32	7.53086e-32	62.6476
FCGR2B	334.916	2.25149	0.146101	15.4105	1.39047e-53	5.83911e-53	2.2664	3.10392	220.506	7.0158e-50	2.95621e-49	2.34213	1.97998	12.8137	3.99603e-31	1.23569e-30	59.4649
RP11-449D8.1	7.02703	2.74253	0.178039	15.4041	1.53603e-53	6.44384e-53	2.68627	-2.04832	243.964	5.37578e-55	2.5455e-54	2.64485	-3.3879	18.7609	5.89232e-55	4.09379e-54	114.371
NCF2	550.262	2.04011	0.132503	15.3968	1.72103e-53	7.21387e-53	2.05172	3.81636	218.463	1.95684e-49	8.16919e-49	2.18579	2.88283	15.6669	2.31281e-42	1.0226e-41	85.1621
LAX1	37.9542	2.57288	0.167172	15.3906	1.89387e-53	7.93296e-53	2.54909	0.0629677	215.385	9.18355e-49	3.77357e-48	2.40324	-1.38939	14.2513	1.03085e-36	3.78486e-36	72.5282
FFAR2	40.5248	2.9846	0.194243	15.3653	2.7984e-53	1.16785e-52	3.25696	0.406411	223.609	1.47652e-50	6.31801e-50	2.03161	-1.74325	10.3644	3.78066e-22	8.93476e-22	39.238
IBSP	25.1984	3.92349	0.255524	15.3547	3.29393e-53	1.37326e-52	3.8875	-0.487333	198.368	4.74114e-45	1.78998e-44	3.73754	-2.95747	16.4652	1.36727e-45	6.72289e-45	92.9124
NAT2	6.25521	3.92106	0.255424	15.3512	3.47838e-53	1.44894e-52	3.83568	-2.17025	229.565	7.41661e-52	3.27341e-51	2.18193	-4.09257	12.4355	1.09246e-29	3.23826e-29	56.5512
HMGN1P36	2.51522	2.98205	0.194296	15.348	3.65223e-53	1.52111e-52	2.91913	-3.04687	309.387	2.97002e-69	1.94536e-68	2.41862	-4.24686	20.3982	1.21242e-61	1.12167e-60	129.68
LINC01272	132.146	2.31484	0.150853	15.345	3.82332e-53	1.59157e-52	2.31154	1.77387	216.068	6.51791e-49	2.6925e-48	2.68778	0.523846	16.5545	5.93315e-46	2.95183e-45	93.6109
PENK	34.3501	3.11087	0.202736	15.3444	3.86179e-53	1.60731e-52	4.06677	0.786974	251.043	1.5382e-56	7.5514e-56	2.27543	-2.02543	10.1348	2.35672e-21	5.44117e-21	37.4419
CHRNA1	18.3358	2.91856	0.190236	15.3418	4.0184e-53	1.67193e-52	2.87648	-0.915146	215.738	7.69437e-49	3.17057e-48	2.96595	-2.58157	16.1199	3.42732e-44	1.60422e-43	89.7029
OSM	88.2817	2.57772	0.168221	15.3234	5.3339e-53	2.2126e-52	2.56701	1.21501	210.908	8.70605e-48	3.50089e-47	2.82741	-0.318457	15.0529	6.73623e-40	2.74119e-39	79.7715
RP11-519G16.5	9.57164	3.26734	0.21329	15.3188	5.72972e-53	2.37441e-52	2.64952	-1.66605	136.035	1.96007e-31	5.4545e-31	3.07814	-3.37486	19.0012	6.13288e-56	4.458e-55	116.621
IGHE	17.0288	4.93826	0.322775	15.2994	7.72164e-53	3.18869e-52	4.77947	-1.0394	194.666	3.04758e-44	1.13093e-43	2.74487	-3.8988	12.1569	1.22013e-28	3.51026e-28	54.149
KB-176G8.1	3.25459	3.3856	0.221473	15.2867	9.37407e-53	3.86657e-52	3.41547	-2.85054	279.8	8.30386e-63	4.70439e-62	2.43274	-4.2421	17.569	4.38549e-50	2.53365e-49	103.218
SLC8A1-AS1	16.0214	2.5041	0.163941	15.2744	1.13346e-52	4.66594e-52	2.35128	-1.04285	219.544	1.1375e-49	4.77115e-49	2.16738	-2.25863	14.3504	4.184e-37	1.55808e-36	73.4635
COL6A5	10.6771	3.87695	0.253999	15.2636	1.33592e-52	5.48844e-52	2.09722	-1.42024	52.0046	5.53712e-13	9.69963e-13	2.73262	-3.64714	13.2834	6.25358e-33	2.04024e-32	63.9517
CD1E	40.9004	3.1566	0.207041	15.2463	1.74296e-52	7.13712e-52	3.11983	0.158133	199.987	2.10204e-45	8.00057e-45	3.86532	-1.86643	19.3578	2.13735e-57	1.64975e-56	119.952
CRTAM	21.3389	2.44053	0.160146	15.2394	1.93593e-52	7.92074e-52	2.39756	-0.712278	215.87	7.19785e-49	2.96844e-48	2.78629	-2.03221	18.6299	2.02274e-54	1.37381e-53	113.132
IGLV3-10	82.014	4.15853	0.273199	15.2216	2.54092e-52	1.03704e-51	4.12971	1.10627	182.209	1.59652e-41	5.58199e-41	3.84613	-2.06573	13.055	4.75198e-32	1.51355e-31	61.8823
RP11-462L8.1	18.5834	2.73154	0.179632	15.2063	3.21068e-52	1.30717e-51	2.68399	-0.892156	210.839	9.0129e-48	3.62311e-47	2.87432	-2.43232	16.6925	1.63287e-46	8.25947e-46	95.0188
ATP5G1P4	4.28077	3.23304	0.212652	15.2035	3.35378e-52	1.36454e-51	3.10356	-2.63017	257.833	5.09312e-58	2.58783e-57	2.32634	-4.02499	15.9545	1.59973e-43	7.34112e-43	88.195
FSD1	12.8821	2.07521	0.13653	15.1996	3.55588e-52	1.44653e-51	2.0339	-1.36966	227.296	2.31743e-51	1.01203e-50	2.21371	-2.37597	17.3735	2.75229e-49	1.5441e-48	101.372
ANKRD55	6.50521	3.42688	0.225819	15.1754	5.14729e-52	2.0881e-51	2.53982	-2.11143	122.202	2.08512e-28	5.39386e-28	2.39068	-3.79464	14.6254	3.40431e-38	1.31568e-37	75.9984
FGF20	14.6692	2.68954	0.177523	15.1504	7.53477e-52	3.04816e-51	2.64107	-1.2207	217.03	4.0197e-49	1.66744e-48	2.17371	-2.65817	12.06	2.81123e-28	8.00066e-28	53.285
AQP10	9.10245	3.51485	0.232015	15.1493	7.66336e-52	3.09967e-51	3.42886	-1.77692	216.77	4.58074e-49	1.89764e-48	2.25318	-3.64637	12.2927	3.77415e-29	1.1015e-28	55.312
LINC00704	11.3993	3.20448	0.211558	15.1471	7.9226e-52	3.20192e-51	3.13008	-1.50526	214.196	1.66924e-48	6.82175e-48	2.9119	-3.24109	16.1871	1.83242e-44	8.64376e-44	90.3387
RP11-815M8.1	4.18142	4.11665	0.271863	15.1424	8.50996e-52	3.43595e-51	4.36534	-2.61762	261.951	6.44398e-59	3.33981e-58	2.41265	-4.4015	14.5489	6.84985e-38	2.6224e-37	75.3106
SLC2A5	143.905	2.18857	0.144663	15.1287	1.04742e-51	4.22011e-51	2.19415	1.89984	212.381	4.15334e-48	1.67994e-47	2.3913	0.757742	14.8687	3.6611e-39	1.45617e-38	78.0105
ITGA4	218.896	2.08277	0.137738	15.1213	1.17255e-51	4.71967e-51	2.11708	2.50763	214.194	1.67086e-48	6.82723e-48	2.10377	1.48366	14.1859	1.86637e-36	6.79926e-36	71.7289
LINC00525	3.46129	3.3693	0.22315	15.0988	1.64865e-51	6.6135e-51	3.34364	-2.7992	254.961	2.15241e-57	1.07907e-56	2.20818	-4.26693	14.495	1.12014e-37	4.26011e-37	74.8215
C1QB	3048.67	2.02514	0.134195	15.091	1.85518e-51	7.43358e-51	2.04172	6.27449	211.521	6.39735e-48	2.57878e-47	2.03609	5.30469	15.1491	2.77741e-40	1.14428e-39	80.2211
RP11-294C11.4	4.32958	4.03803	0.267596	15.09	1.88349e-51	7.54218e-51	2.91492	-2.52721	152.015	6.28903e-35	1.89082e-34	2.01016	-4.21593	13.0067	7.28265e-32	2.30569e-31	61.5279
IGHV1OR15-1	4.32958	4.03803	0.267596	15.09	1.88349e-51	7.54218e-51	2.91492	-2.52721	152.015	6.28781e-35	1.89068e-34	2.01016	-4.21593	13.0067	7.28265e-32	2.30569e-31	61.5279
IGKV2-30	57.1386	3.79432	0.251462	15.0891	1.91113e-51	7.65161e-51	3.7405	0.625582	187.478	1.12912e-42	4.04986e-42	3.57294	-2.05564	14.177	2.02427e-36	7.36048e-36	71.8864
CTD-3094K11.1	3.62591	3.14944	0.209123	15.0603	2.95608e-51	1.1801e-50	3.0586	-2.77608	264.16	2.12674e-59	1.11341e-58	2.25598	-4.12599	16.1319	3.06686e-44	1.43713e-43	89.8381
SERPINB2	186.253	2.84976	0.189308	15.0536	3.27048e-51	1.30478e-50	2.84407	2.26319	198.989	3.47035e-45	1.3134e-44	2.49984	0.395486	9.13237	5.32176e-18	1.11214e-17	29.6178
GLIS1	15.8927	2.5177	0.167448	15.0357	4.28473e-51	1.70558e-50	2.45815	-1.11944	210.466	1.08717e-47	4.36046e-47	2.29793	-2.45312	14.4323	1.98456e-37	7.48006e-37	74.2123
AC108142.1	15.7633	2.38851	0.158953	15.0265	4.92106e-51	1.95731e-50	2.35135	-1.10391	212.777	3.40435e-48	1.37969e-47	2.50297	-2.38681	16.1166	3.53583e-44	1.65345e-43	89.6672
RP11-615I2.2	13.7076	2.94192	0.195866	15.02	5.42788e-51	2.15475e-50	2.88553	-1.28901	218.925	1.55181e-49	6.4925e-49	3.54789	-2.877	23.0079	3.42488e-72	5.0381e-71	153.854
VDAC1P2	2.08782	2.71357	0.180685	15.0183	5.57276e-51	2.21156e-50	2.74718	-3.22328	296.81	1.63189e-66	1.00202e-65	2.00106	-4.35666	16.7	1.52146e-46	7.70851e-46	95.1152
RP11-247A12.2	11.424	2.16811	0.14438	15.0167	5.70562e-51	2.26392e-50	2.00966	-1.50148	210.997	8.32391e-48	3.34777e-47	2.16435	-2.50966	15.0552	6.59346e-40	2.68485e-39	79.8897
LINC00694	12.598	2.21147	0.147313	15.012	6.12713e-51	2.42846e-50	2.15289	-1.40267	217.905	2.58998e-49	1.07833e-48	2.06612	-2.47772	14.3226	5.39141e-37	1.99604e-36	73.2198
ECEL1P2	12.1481	3.6699	0.244923	14.9838	9.36382e-51	3.69772e-50	3.58622	-1.43702	200.044	2.04308e-45	7.77856e-45	2.41581	-3.52749	11.2527	2.62926e-25	6.83706e-25	46.5302
PPBP	9.97309	3.73277	0.24946	14.9634	1.27413e-50	5.01236e-50	6.21397	1.51685	204.6	2.07065e-46	8.06024e-46	2.231	-3.69848	10.3162	5.55993e-22	1.30961e-21	38.9499
PLD4	114.268	2.31747	0.154916	14.9595	1.35041e-50	5.30905e-50	2.30412	1.56405	204.717	1.95223e-46	7.60285e-46	2.71877	0.306828	17.8147	4.35158e-51	2.60308e-50	105.409
AC104654.2	7.33809	2.34718	0.157515	14.9013	3.23092e-50	1.26163e-49	2.30602	-2.02669	236.888	1.87656e-53	8.57348e-53	2.58873	-3.19987	18.9431	1.05951e-55	7.61469e-55	116.078
MTND4P20	21.465	3.50474	0.235229	14.8993	3.33064e-50	1.29975e-49	3.46145	-0.710018	191.34	1.62147e-43	5.91231e-43	2.90802	-2.89108	12.7073	1.01758e-30	3.10718e-30	58.8737
TDO2	85.5023	2.65713	0.178446	14.8904	3.80575e-50	1.48376e-49	2.63545	1.16714	195.597	1.90815e-44	7.11217e-44	3.4808	-0.525756	18.9953	6.48349e-56	4.70185e-55	116.523
HSP90AB2P	4.94273	2.5661	0.17248	14.8777	4.60229e-50	1.79206e-49	2.51282	-2.46964	241.579	1.77967e-54	8.30657e-54	2.28722	-3.67473	14.9248	2.18816e-39	8.76923e-39	78.7249
GSDMA	24.5052	2.92574	0.196806	14.8661	5.46929e-50	2.12599e-49	2.05043	-0.444168	82.925	8.52277e-20	1.78801e-19	2.91119	-2.32273	13.9456	1.64482e-35	5.79573e-35	69.8147
LY86	166.706	2.28253	0.153686	14.852	6.75689e-50	2.62321e-49	2.27499	2.09646	202.596	5.66558e-46	2.18484e-45	2.77302	0.844984	18.1953	1.21079e-52	7.71096e-52	108.95
CDH16	12.9695	3.45066	0.23263	14.8333	8.92721e-50	3.46037e-49	3.87672	-0.934989	211.787	5.59711e-48	2.2595e-47	2.17408	-3.36377	10.1716	1.7605e-21	4.08398e-21	37.7988
COLEC10	3.33111	2.91211	0.196511	14.8191	1.10298e-49	4.27004e-49	2.83848	-2.83989	261.949	6.45301e-59	3.34379e-58	2.15673	-4.10265	16.0799	4.97786e-44	2.31731e-43	89.3568
IFI44L	786.795	2.4068	0.162522	14.8091	1.27915e-49	4.94591e-49	2.42195	4.32591	199.766	2.3487e-45	8.92297e-45	2.33693	2.94898	12.973	9.81514e-32	3.09211e-31	60.7698
IGKV3OR2-268	4.27177	4.09377	0.276457	14.808	1.30065e-49	5.0267e-49	7.24702	-0.183551	253.808	3.83926e-57	1.91316e-56	2.33838	-4.37012	13.0795	3.82305e-32	1.22065e-31	62.168
IGLV1-36	19.9256	4.69136	0.316959	14.8012	1.43996e-49	5.56075e-49	5.36592	-0.127059	192.151	1.07876e-43	3.95666e-43	2.94063	-3.6793	12.0143	4.1641e-28	1.17806e-27	52.9251
HCAR2	44.8619	3.06194	0.207002	14.7918	1.65431e-49	6.38156e-49	3.03191	0.270314	191.507	1.49044e-43	5.43932e-43	3.07056	-1.78367	14.6088	3.96293e-38	1.52872e-37	75.7876
RP11-24F11.2	4.90029	2.85431	0.192981	14.7906	1.6836e-49	6.49356e-49	2.77741	-2.47451	242.079	1.38452e-54	6.4805e-54	2.36133	-3.80257	15.687	1.91977e-42	8.5216e-42	85.7225
PMCH	4.7282	3.53262	0.239104	14.7744	2.14354e-49	8.24703e-49	3.39679	-2.48514	250.854	1.69136e-56	8.29675e-56	2.77975	-4.03487	19.2128	8.36997e-57	6.2904e-56	118.602
LINC01589	4.37141	3.04979	0.20657	14.764	2.50125e-49	9.61283e-49	2.96564	-2.60328	242.032	1.41774e-54	6.63348e-54	2.15107	-3.96746	14.5767	5.31301e-38	2.04096e-37	75.5594
RGS20	9.09648	3.1178	0.211699	14.7275	4.2909e-49	1.64273e-48	3.05579	-1.78318	208.348	3.14927e-47	1.25139e-46	2.02122	-3.46751	11.0498	1.41882e-24	3.61601e-24	44.8597
RP11-297J22.1	3.25292	3.25874	0.221494	14.7126	5.35321e-49	2.0469e-48	3.26996	-2.85832	258.556	3.54156e-58	1.8065e-57	2.31176	-4.26182	16.622	3.15862e-46	1.58736e-45	94.3877
RP11-395B7.2	15.0882	3.25552	0.22146	14.7002	6.42421e-49	2.45264e-48	3.21198	-1.17969	196.231	1.38764e-44	5.18533e-44	2.60217	-3.07681	12.8857	2.12017e-31	6.61394e-31	60.439
AQP9	138.15	2.44502	0.166359	14.6972	6.71344e-49	2.56267e-48	2.01328	1.9069	117.722	1.99442e-27	5.05909e-27	2.39553	0.389897	12.0041	4.54474e-28	1.284e-27	52.6181
IGF2BP3	177.977	3.08192	0.209938	14.6801	8.64647e-49	3.29245e-48	3.11451	2.21546	188.288	7.51818e-43	2.70517e-42	2.79582	-0.0667952	9.31507	1.34806e-18	2.87082e-18	31.0188
IL7R	745.443	2.32651	0.15849	14.6792	8.75715e-49	3.33408e-48	2.34808	4.24867	199.021	3.41569e-45	1.29291e-44	2.14078	2.9592	11.3765	9.33601e-26	2.46253e-25	47.0632
LINC01356	4.03249	3.06609	0.208891	14.6779	8.92933e-49	3.39912e-48	2.94896	-2.68219	244.157	4.87911e-55	2.31429e-54	2.22088	-4.02127	15.061	6.25047e-40	2.54769e-39	79.9746
RP11-325F22.2	7.29224	2.92066	0.199231	14.6597	1.16825e-48	4.43628e-48	2.44014	-2.00223	147.776	5.30941e-34	1.56336e-33	2.34175	-3.50095	14.7901	7.53517e-39	2.96335e-38	77.493
CDKN2B-AS1	12.1069	2.27084	0.154926	14.6576	1.20539e-48	4.5766e-48	2.23044	-1.44676	209.808	1.51283e-47	6.04425e-47	2.24554	-2.61504	15.0175	9.33234e-40	3.78152e-39	79.5475
ZCCHC12	11.0882	2.30443	0.157718	14.6111	2.3855e-48	9.01864e-48	2.26663	-1.54162	209.433	1.82656e-47	7.28832e-47	2.22144	-2.72774	16.2782	7.83533e-45	3.74873e-44	91.1754
RP5-881L22.5	5.97672	2.82341	0.193256	14.6097	2.43735e-48	9.21184e-48	2.74742	-2.28321	223.659	1.44e-50	6.16386e-50	2.03545	-3.64228	12.0412	3.30309e-28	9.37146e-28	53.1605
RP11-693J15.4	13.7631	3.85345	0.263781	14.6085	2.47746e-48	9.36061e-48	2.3065	-1.16569	76.4818	2.22252e-18	4.49298e-18	2.11385	-3.42258	10.7155	2.21183e-23	5.43782e-23	42.1361
IGKV1D-16	9.96554	3.88656	0.266313	14.5939	3.07036e-48	1.15761e-47	4.47205	-1.06034	208.333	3.17383e-47	1.26095e-46	2.73161	-3.6862	12.9741	9.71599e-32	3.06242e-31	61.2282
KLK4	11.4979	3.45183	0.236562	14.5917	3.17422e-48	1.19658e-47	3.37535	-1.5105	196.898	9.92554e-45	3.72354e-44	2.79973	-3.45356	14.2752	8.29676e-37	3.05572e-36	72.8171
EN1	10.2593	3.15581	0.217202	14.5294	7.89082e-48	2.95709e-47	3.08233	-1.65782	199.835	2.26951e-45	8.63006e-45	2.26023	-3.41262	11.8699	1.43333e-27	3.9869e-27	51.6969
AC147651.4	17.698	2.11565	0.14569	14.5215	8.84994e-48	3.31252e-47	2.06418	-0.976108	202.106	7.24915e-46	2.79162e-45	2.19371	-2.05963	16.3213	5.24426e-45	2.52806e-44	91.5568
UBASH3A	34.555	2.18554	0.150676	14.5049	1.12832e-47	4.21632e-47	2.15331	-0.0875058	195.748	1.76909e-44	6.60078e-44	2.29054	-1.25481	16.1764	2.02427e-44	9.54332e-44	90.1837
BNIP3P4	6.03316	3.57601	0.24687	14.4854	1.49847e-47	5.58853e-47	3.49714	-2.24597	215.582	8.32017e-49	3.42333e-48	2.39303	-4.00846	13.3314	4.07914e-33	1.33892e-32	64.384
CD40LG	21.3805	2.74993	0.190099	14.4658	1.99289e-47	7.41798e-47	2.72134	-0.722702	193.464	5.57541e-44	2.05802e-43	2.86119	-2.37538	16.5865	4.40216e-46	2.20072e-45	94.0307
IL13RA2	15.9497	2.6754	0.185105	14.4534	2.38457e-47	8.86661e-47	4.27454	0.309312	259.032	2.78981e-58	1.42656e-57	2.51276	-2.53186	12.8669	2.50223e-31	7.78608e-31	60.254
MCEMP1	86.8049	2.8174	0.195453	14.4147	4.18317e-47	1.54848e-46	2.18757	1.27256	98.4572	3.32122e-23	7.59315e-23	2.54868	-0.724715	10.9137	4.36176e-24	1.09534e-23	43.5964
SCD	4141	2.02703	0.140765	14.4002	5.16219e-47	1.90748e-46	2.0485	6.70864	195.73	1.78546e-44	6.66088e-44	2.44242	5.66807	18.7016	1.02962e-54	7.07626e-54	113.404
AC012360.6	7.88473	2.17362	0.151041	14.3909	5.89865e-47	2.17572e-46	2.15068	-1.94594	212.421	4.07027e-48	1.64715e-47	2.10267	-3.01044	15.1454	2.87321e-40	1.18257e-39	80.7305
MT-TC	2.77631	3.20892	0.22317	14.3788	7.02945e-47	2.58628e-46	3.22568	-3.01048	253.747	3.95995e-57	1.97251e-56	2.27202	-4.3791	17.1416	2.4271e-48	1.31387e-47	99.2286
RP11-626H12.2	2.99149	3.18483	0.221702	14.3653	8.53825e-47	3.13722e-46	3.20946	-2.93711	248.907	4.49471e-56	2.1824e-55	2.31456	-4.32992	16.7925	6.40223e-47	3.29411e-46	95.9748
TRAT1	21.7564	2.93169	0.204192	14.3575	9.5568e-47	3.50679e-46	2.91477	-0.685691	189.636	3.81786e-43	1.38235e-42	3.05996	-2.5319	16.7646	8.31452e-47	4.26038e-46	95.6925
RP11-89K21.1	22.2647	3.53996	0.246844	14.3409	1.21427e-46	4.44582e-46	3.44923	-0.673243	172.148	2.51148e-39	8.34506e-39	2.0029	-3.05915	8.07869	1.05121e-14	1.9868e-14	22.3722
IL22RA2	7.83191	4.06771	0.283656	14.3403	1.22567e-46	4.48625e-46	3.9839	-1.94647	211.721	5.78575e-48	2.33489e-47	3.13094	-3.96886	17.9062	1.83962e-51	1.1155e-50	106.37
GPC5	8.7064	2.79623	0.195124	14.3305	1.41067e-46	5.16012e-46	2.7359	-1.8294	196.905	9.892e-45	3.71152e-44	2.0625	-3.35095	11.8888	1.21948e-27	3.40043e-27	51.8565
GUCA1A	5.07006	3.63706	0.253975	14.3205	1.62878e-46	5.95119e-46	3.53849	-2.43658	215.359	9.30491e-49	3.8228e-48	2.53447	-4.13973	15.3437	4.61087e-41	1.95113e-40	82.5654
RP11-247C2.2	10.2671	2.1853	0.152664	14.3144	1.77858e-46	6.49088e-46	2.14167	-1.63441	200.639	1.51481e-45	5.78592e-45	2.35443	-2.7682	16.4798	1.1932e-45	5.87514e-45	93.0483
RP11-594N15.3	4.39223	2.40531	0.168045	14.3135	1.80212e-46	6.5758e-46	2.39111	-2.56892	242.99	8.76593e-55	4.12326e-54	2.31855	-3.74335	17.7042	1.23002e-50	7.24443e-50	104.481
RP4-539M6.19	55.4546	2.67463	0.186879	14.3121	1.83862e-46	6.70704e-46	2.6432	0.561723	186.688	1.6799e-42	5.99678e-42	3.18969	-1.08538	14.0829	4.75199e-36	1.70688e-35	70.9932
IGKV1D-13	48.8037	4.99759	0.349238	14.31	1.89519e-46	6.91237e-46	4.93443	0.40961	153.919	2.41194e-35	7.33149e-35	3.06245	-3.31333	10.6139	5.05158e-23	1.22796e-22	41.3076
SRMS	16.9294	2.86661	0.200361	14.3073	1.97154e-46	7.18769e-46	2.78733	-1.03932	182.866	1.14712e-41	4.02205e-41	2.32843	-2.74129	11.2645	2.3833e-25	6.20789e-25	46.5985
KRT8P5	2.28584	2.75613	0.192656	14.306	2.00721e-46	7.31666e-46	2.68673	-3.15732	252.118	8.96721e-57	4.42762e-56	2.02535	-4.3085	15.9474	1.70837e-43	7.83392e-43	88.133
RETN	37.5998	3.19614	0.223424	14.3053	2.0283e-46	7.39137e-46	2.05172	0.180972	62.1378	3.2025e-15	5.9638e-15	2.63839	-2.16079	11.1377	6.84926e-25	1.76042e-24	45.5213
RP11-542B15.1	3.93195	3.18469	0.222671	14.3023	2.11787e-46	7.71325e-46	3.1475	-2.65168	246.048	1.88846e-55	9.04209e-55	2.65772	-4.10533	18.7321	7.72755e-55	5.33749e-54	114.102
ADAMTS18	22.0544	2.45694	0.171961	14.2878	2.6088e-46	9.48587e-46	2.41446	-0.672356	186.126	2.22822e-42	7.93587e-42	2.31816	-2.09521	14.2881	7.37903e-37	2.72054e-36	72.8926
CCR9	10.323	2.37241	0.166046	14.2877	2.61124e-46	9.49337e-46	2.33331	-1.62563	199.819	2.28777e-45	8.69683e-45	2.24313	-2.88125	14.5542	6.5246e-38	2.4998e-37	75.3328
IGLV2-18	17.5997	3.85136	0.269766	14.2766	3.06035e-46	1.1118e-45	4.34665	-0.487823	188.186	7.91223e-43	2.84613e-42	3.08854	-3.35256	13.3027	5.26538e-33	1.72184e-32	64.1141
SOX30	7.28754	2.27268	0.159285	14.268	3.46269e-46	1.25668e-45	2.24157	-2.02801	208.659	2.69481e-47	1.07167e-46	2.04711	-3.17646	14.076	5.05577e-36	1.81364e-35	71.0181
FGF5	8.87518	3.55148	0.249313	14.2451	4.81067e-46	1.7408e-45	3.46753	-1.8058	192.524	8.94189e-44	3.28456e-43	2.71018	-3.7321	14.5571	6.35718e-38	2.43754e-37	75.3751
CTD-2269F5.1	3.88762	2.64673	0.186046	14.2262	6.29733e-46	2.27214e-45	2.55901	-2.71166	230.334	5.04151e-52	2.23746e-51	2.28636	-3.93978	17.0367	6.49086e-48	3.46165e-47	98.2484
RP1-86C11.7	5.68178	2.87574	0.202608	14.1936	1.00357e-45	3.60267e-45	2.7841	-2.34983	212.74	3.46862e-48	1.40528e-47	2.04984	-3.75473	12.959	1.11008e-31	3.49404e-31	61.1015
GDF3	2.75893	2.90124	0.204876	14.1609	1.59846e-45	5.7184e-45	2.82155	-3.0224	234.957	4.94825e-53	2.24338e-52	2.09093	-4.29354	16.4593	1.4453e-45	7.10238e-45	92.8766
TMEM92-AS1	4.05541	2.66951	0.188672	14.1489	1.89636e-45	6.77339e-45	2.589	-2.67979	234.159	7.38463e-53	3.33942e-52	2.23365	-3.90492	16.0435	6.98239e-44	3.23409e-43	89.0184
RP11-1008C21.1	7.71199	3.26956	0.23123	14.1399	2.15681e-45	7.69479e-45	3.20886	-1.96527	201.578	9.44952e-46	3.6266e-45	2.86924	-3.68841	16.4263	1.96598e-45	9.60779e-45	92.5638
RP11-221J22.2	3.15784	3.48107	0.246295	14.1338	2.35235e-45	8.38279e-45	3.54522	-2.89446	224.974	7.43884e-51	3.20628e-50	2.05434	-4.44799	13.6261	2.9219e-34	9.91034e-34	67.0103
STEAP1B	8.83114	2.31296	0.163845	14.1167	2.99648e-45	1.06629e-44	2.26511	-1.82831	205.382	1.39808e-46	5.46276e-46	2.15536	-2.96818	15.4744	1.37636e-41	5.92929e-41	83.7507
XCR1	29.2463	2.89149	0.205103	14.0977	3.92079e-45	1.3934e-44	2.87537	-0.295389	178.47	1.04584e-40	3.5899e-40	2.98809	-2.20372	14.7608	9.85284e-39	3.86319e-38	77.1886
AC005330.2	3.06877	2.79071	0.198688	14.0457	8.18419e-45	2.88831e-44	2.68655	-2.92347	237.607	1.30754e-53	5.9903e-53	2.21152	-4.16764	17.8328	3.66917e-51	2.19964e-50	105.685
SAA2-SAA4	14.7788	3.55632	0.253373	14.0359	9.39856e-45	3.31358e-44	3.38412	-1.17622	170.895	4.7177e-39	1.55654e-38	2.93072	-3.25972	14.462	1.51455e-37	5.73466e-37	74.5031
RP11-638I2.6	72.7264	2.34064	0.166997	14.0161	1.24281e-44	4.37237e-44	2.25807	0.881965	180.79	3.25785e-41	1.12983e-40	2.81255	-0.454898	15.4786	1.32363e-41	5.70512e-41	83.6921
GDF5	5.42352	2.92229	0.208925	13.9873	1.86407e-44	6.54044e-44	2.85051	-2.35713	211.947	5.16478e-48	2.08633e-47	2.4253	-3.79421	16.0817	4.89403e-44	2.27914e-43	89.3702
APOC4-APOC2	122.928	2.59909	0.186007	13.9731	2.27651e-44	7.97628e-44	2.55538	1.66284	175.279	5.20207e-40	1.75745e-39	3.42493	-0.061019	17.827	3.87416e-51	2.32085e-50	105.545
EEF1A1P7	2.29133	2.58118	0.184787	13.9684	2.43155e-44	8.51232e-44	2.54112	-3.18342	256.198	1.15708e-57	5.84089e-57	2.06093	-4.30982	17.3856	2.456e-49	1.38006e-48	101.506
CTA-363E6.6	7.25974	2.67868	0.1918	13.966	2.5134e-44	8.79389e-44	2.59371	-2.05149	190.151	2.94637e-43	1.06961e-42	2.52034	-3.42551	15.5524	6.68345e-42	2.91306e-41	84.477
HAS1	69.9868	3.25947	0.233769	13.9432	3.46311e-44	1.20895e-43	2.67305	0.916858	106.796	4.93522e-25	1.17935e-24	2.65824	-1.63909	10.3931	3.00241e-22	7.11927e-22	39.4595
ICAM4	9.60301	2.29894	0.164944	13.9377	3.73802e-44	1.30382e-43	2.16097	-1.69957	186.82	1.57187e-42	5.61599e-42	2.07716	-2.85315	13.9896	1.10507e-35	3.91385e-35	70.2309
GRIK4	4.69284	2.53817	0.1823	13.923	4.59087e-44	1.59837e-43	2.46346	-2.51745	213.403	2.48601e-48	1.01147e-47	2.18203	-3.75063	16.4506	1.56672e-45	7.67927e-45	92.7924
NOS2	27.3778	2.19964	0.158077	13.9149	5.14158e-44	1.78785e-43	2.15992	-0.400273	178.373	1.09802e-40	3.76587e-40	2.01078	-1.61813	12.7453	7.28583e-31	2.236e-30	59.1484
IGLV5-45	22.5021	3.91464	0.281919	13.8857	7.73927e-44	2.68512e-43	4.2305	-0.319027	171.421	3.62013e-39	1.19839e-38	3.03652	-3.24065	12.0535	2.97324e-28	8.4559e-28	53.248
GZMM	30.8467	2.28986	0.164949	13.8822	8.11581e-44	2.81418e-43	2.23636	-0.252624	178.649	9.55645e-41	3.28347e-40	2.37877	-1.56836	16.1189	3.46175e-44	1.62003e-43	89.6616
TNFSF18	18.475	3.09056	0.222705	13.8774	8.68776e-44	3.00831e-43	3.20545	-0.887286	194.566	3.20492e-44	1.18867e-43	3.53204	-2.88307	18.3556	2.67861e-53	1.74116e-52	110.57
SPATA20P1	3.15697	3.33273	0.240648	13.849	1.29041e-43	4.45154e-43	3.37457	-2.87512	225.013	7.29349e-51	3.14473e-50	2.16466	-4.37503	14.4959	1.11111e-37	4.2264e-37	74.831
RP11-385D13.1	13.0176	2.66509	0.192456	13.8478	1.31159e-43	4.52399e-43	2.46359	-1.33277	170.535	5.65392e-39	1.86246e-38	2.20235	-2.78145	11.7731	3.27307e-27	9.00837e-27	50.8543
GNAQP1	2.70542	2.49057	0.17986	13.8473	1.32103e-43	4.55589e-43	2.45039	-3.02923	234.987	4.87263e-53	2.2095e-52	2.03281	-4.13123	15.746	1.1105e-42	4.96488e-42	86.271
OPCML	24.4516	2.21187	0.160046	13.8202	1.92475e-43	6.61776e-43	2.1664	-0.553903	173.709	1.14598e-39	3.834e-39	2.15689	-1.80601	13.1288	2.47043e-32	7.93059e-32	62.5212
RPL29P19	5.39799	2.93821	0.212641	13.8177	1.99304e-43	6.8478e-43	2.86727	-2.38625	203.904	2.9371e-46	1.14008e-45	2.08806	-3.86223	13.5381	6.43443e-34	2.16261e-33	66.2178
TLR7	80.4817	2.20891	0.160303	13.7796	3.38125e-43	1.15695e-42	2.20892	1.09829	175.754	4.0981e-40	1.38713e-39	2.6211	-0.227824	15.6168	3.68163e-42	1.61659e-41	84.9535
CXorf21	41.7386	2.04257	0.148245	13.7783	3.44104e-43	1.17724e-42	2.03065	0.184144	177.179	2.00203e-40	6.81926e-40	2.42926	-0.968862	16.382	2.97323e-45	1.4445e-44	92.0818
CCL3	87.0635	2.24463	0.163042	13.7672	4.01267e-43	1.3713e-42	2.21434	1.17572	174.276	8.61634e-40	2.89359e-39	2.77537	-0.17192	16.8094	5.46602e-47	2.82e-46	96.0267
APOC2	40.1613	2.76623	0.2012	13.7487	5.18761e-43	1.76869e-42	2.66618	0.109926	174.56	7.46845e-40	2.5115e-39	3.55178	-1.64435	19.3771	1.7827e-57	1.38159e-56	120.129
CCL8	21.1987	2.70098	0.197228	13.6947	1.09238e-42	3.70102e-42	2.65444	-0.744577	170.256	6.50639e-39	2.13902e-38	2.69366	-2.45733	13.9667	1.36006e-35	4.80461e-35	70.0093
XXbac-BPG246D15.9	141.262	2.98753	0.218233	13.6896	1.17096e-42	3.9651e-42	2.9929	1.88508	163.307	2.14335e-37	6.83028e-37	4.00409	-0.243008	13.4791	1.0907e-33	3.63973e-33	65.5406
LINC00337	3.32285	2.86769	0.209503	13.688	1.19734e-42	4.05389e-42	2.79962	-2.85458	214.442	1.47505e-48	6.03311e-48	2.00602	-4.17784	13.6618	2.12144e-34	7.23193e-34	67.325
GABRQ	3.74112	3.00702	0.22031	13.649	2.04576e-42	6.89259e-42	3.94862	-2.04371	224.423	9.80985e-51	4.21579e-50	2.0536	-4.12001	12.8602	2.65387e-31	8.24965e-31	60.2425
RP6-74O6.6	5.75065	2.20705	0.161753	13.6446	2.17546e-42	7.32361e-42	2.18264	-2.31332	203.669	3.30522e-46	1.28217e-45	2.11826	-3.43671	15.2311	1.30311e-40	5.43093e-40	81.5257
LRRC19	48.2383	2.63524	0.193538	13.6162	3.21014e-42	1.07718e-41	2.69877	0.384237	179.727	5.55905e-41	1.92064e-40	2.22287	-1.43725	9.56613	1.99082e-19	4.34394e-19	33.0118
SLC7A3	5.19243	2.94411	0.21626	13.6138	3.31615e-42	1.11245e-41	2.87223	-2.38555	195.042	2.52223e-44	9.37568e-44	2.48253	-3.89301	16.3262	5.00939e-45	2.41718e-44	91.637
CLEC2L	11.0466	2.70547	0.198831	13.6069	3.64365e-42	1.22132e-41	2.64616	-1.5494	175.745	4.11745e-40	1.39349e-39	2.60897	-3.13024	15.8412	4.58689e-43	2.07614e-42	87.1356
AC005944.2	182.651	2.29209	0.169231	13.5441	8.58496e-42	2.86061e-41	2.23127	2.163	169.571	9.18226e-39	3.01155e-38	2.25889	0.814457	9.9066	1.4215e-20	3.20563e-20	35.4418
KLHL38	6.11428	2.41836	0.178569	13.543	8.71189e-42	2.90241e-41	2.64311	-2.05261	193.027	6.94385e-44	2.55744e-43	2.131	-3.48662	13.7296	1.15294e-34	3.96902e-34	67.9186
CCL7	5.51908	3.56014	0.262996	13.5369	9.47076e-42	3.15197e-41	3.47226	-2.34466	187.327	1.21869e-42	4.3667e-42	2.28642	-4.15453	12.8851	2.12986e-31	6.6432e-31	60.4598
UBD	2250.88	2.48556	0.183859	13.5188	1.21129e-41	4.01839e-41	2.45836	5.82163	160.844	7.40099e-37	2.33483e-36	2.82639	4.12536	13.306	5.11494e-33	1.67359e-32	63.6438
LINC01013	4.86838	2.62555	0.19442	13.5045	1.47029e-41	4.87109e-41	2.5772	-2.4772	207.715	4.3283e-47	1.71522e-46	2.38451	-3.80406	17.1051	3.41861e-48	1.84138e-47	98.8849
TBCAP1	2.87949	2.22825	0.165031	13.5021	1.52065e-41	5.03524e-41	2.15603	-2.99494	232.555	1.65237e-52	7.40747e-52	2.05766	-4.04173	16.9794	1.11082e-47	5.89e-47	97.7152
NPSR1-AS1	10.58	2.7399	0.203371	13.4724	2.27417e-41	7.50133e-41	2.69073	-1.58764	169.165	1.12601e-38	3.68524e-38	2.02094	-3.20241	10.394	2.98169e-22	7.07079e-22	39.5515
KRT42P	6.50734	2.51385	0.186975	13.4448	3.3028e-41	1.08697e-40	2.45791	-2.17611	184.805	4.32957e-42	1.53254e-41	2.17117	-3.50424	14.1862	1.86136e-36	6.782e-36	72.0184
UG0898H09	16.5896	2.32877	0.173422	13.4284	4.1229e-41	1.35489e-40	2.25382	-1.053	164.266	1.3235e-37	4.23448e-37	2.00077	-2.39785	11.2918	1.89686e-25	4.958e-25	46.8084
FBXO39	7.08297	2.13287	0.15915	13.4016	5.91686e-41	1.93828e-40	2.10904	-2.08031	188.141	8.09218e-43	2.9096e-42	2.23825	-3.21614	15.9303	2.0033e-43	9.16772e-43	87.9619
CCNA1	9.08242	2.25111	0.168338	13.3726	8.74595e-41	2.85338e-40	2.58576	-1.53085	191.941	1.19883e-43	4.38929e-43	2.10086	-2.99599	13.8003	6.10327e-35	2.11574e-34	68.5373
FUT7	13.7173	2.23737	0.167494	13.358	1.06439e-40	3.46712e-40	2.14141	-1.28634	171.602	3.30534e-39	1.09491e-38	2.45278	-2.5241	16.8649	3.24798e-47	1.69185e-46	96.6282
CLDN2	2805.55	2.57218	0.193155	13.3167	1.85212e-40	6.00155e-40	2.5784	6.14277	159.56	1.4115e-36	4.42537e-36	2.44609	4.28424	9.01214	1.30216e-17	2.68845e-17	28.3516
LY75-CD302	14.0772	4.12182	0.310359	13.2808	2.99121e-40	9.65484e-40	3.95566	-1.17411	142.334	8.2199e-33	2.35392e-32	2.71233	-3.70724	11.5961	1.46862e-26	3.96987e-26	49.3934
CCL4L2	59.3755	2.4556	0.184912	13.2798	3.0316e-40	9.78394e-40	2.42175	0.647099	159.148	1.73725e-36	5.435e-36	3.21499	-1.0142	17.5476	5.36105e-50	3.08792e-49	102.963
CCDC129	11.4785	2.73678	0.20623	13.2705	3.43211e-40	1.10593e-39	2.70787	-1.49542	166.553	4.18901e-38	1.35369e-37	2.09121	-3.16373	10.971	2.72036e-24	6.87315e-24	44.2034
WISP1-OT1	14.2087	2.79387	0.21121	13.2279	6.05447e-40	1.94588e-39	2.61103	-1.22723	171.378	3.69942e-39	1.22431e-38	2.69417	-2.77216	13.7193	1.26499e-34	4.34814e-34	67.8041
PDE6G	17.0799	2.36006	0.178621	13.2127	7.41241e-40	2.378e-39	2.35182	-1.01575	171.144	4.16128e-39	1.37515e-38	2.95503	-2.45048	17.6851	1.47202e-50	8.64927e-50	104.288
RP11-411K7.1	6.40148	2.59761	0.197132	13.177	1.19052e-39	3.80511e-39	2.53287	-2.17955	174.173	9.07568e-40	3.04456e-39	2.06031	-3.58973	12.3805	1.76248e-29	5.19579e-29	56.0674
ADRB3	5.42023	2.97701	0.226132	13.1649	1.39699e-39	4.4564e-39	2.90501	-2.34067	180.655	3.48598e-41	1.2081e-40	2.43946	-3.91637	15.36	3.96271e-41	1.68087e-40	82.7142
DLEU7-AS1	3.74674	2.44871	0.186088	13.1589	1.51297e-39	4.82266e-39	2.39097	-2.73662	199.365	2.87315e-45	1.08921e-44	2.13058	-3.94366	15.462	1.54387e-41	6.63937e-41	83.6526
LL21NC02-1C16.2	8.55991	2.34459	0.178289	13.1505	1.69038e-39	5.38403e-39	2.32024	-1.85948	177.742	1.50814e-40	5.15467e-40	2.2739	-3.15185	14.9299	2.0881e-39	8.37501e-39	78.7617
LINC01096	4.03074	2.54212	0.19343	13.1423	1.88374e-39	5.99298e-39	2.50292	-2.66351	198.025	5.6351e-45	2.12394e-44	2.09613	-3.94513	14.0197	8.42082e-36	2.9948e-35	70.5263
RAET1K	2.79424	2.70988	0.206363	13.1316	2.16944e-39	6.88425e-39	2.65495	-3.01332	206.953	6.34853e-47	2.50104e-46	2.0087	-4.26903	14.4458	1.75549e-37	6.63277e-37	74.3761
ZFP57	34.7193	3.77801	0.288847	13.0796	4.30643e-39	1.3584e-38	3.4749	-0.0668528	120.71	4.42195e-28	1.13772e-27	2.00579	-3.11362	7.50261	5.13811e-13	9.19328e-13	18.5474
GRP	83.3765	2.72956	0.209541	13.0264	8.66023e-39	2.71347e-38	3.124	1.43696	174.37	8.21675e-40	2.76052e-39	3.64785	-0.891662	14.2617	9.37883e-37	3.45016e-36	72.5986
ZFHX4-AS1	4.58649	2.73412	0.2101	13.0134	1.02629e-38	3.20955e-38	2.68136	-2.52265	189.001	5.25266e-43	1.89577e-42	2.39058	-3.9322	15.8623	3.76773e-43	1.71192e-42	87.3424
GFI1B	7.2817	2.46092	0.189237	13.0045	1.15417e-38	3.6054e-38	2.43638	-2.03194	172.272	2.3604e-39	7.84619e-39	2.03889	-3.42697	12.5977	2.65514e-30	7.99925e-30	57.9422
IGLV10-54	28.1153	3.93463	0.303523	12.9632	1.97808e-38	6.15742e-38	3.89829	-0.333445	140.016	2.64111e-32	7.47964e-32	3.06517	-3.22667	11.7594	3.67581e-27	1.01e-26	50.752
RP1-102K2.8	13.8502	2.28203	0.176099	12.9588	2.09589e-38	6.52333e-38	2.24772	-1.29633	159.118	1.76313e-36	5.51457e-36	2.4228	-2.63355	14.8976	2.80917e-39	1.12217e-38	78.452
CHST13	14.7158	2.26153	0.174649	12.949	2.3814e-38	7.40544e-38	2.18441	-1.21983	154.555	1.75163e-35	5.33743e-35	2.00913	-2.55132	11.5364	2.43113e-26	6.52338e-26	48.8542
IGHV4-28	8.00454	3.6624	0.283825	12.9037	4.28849e-38	1.32629e-37	3.55814	-1.8924	154.135	2.16416e-35	6.58314e-35	2.20595	-4.03168	11.2617	2.43883e-25	6.34919e-25	46.6177
SEMA3E	137.56	2.29848	0.178586	12.8704	6.60505e-38	2.03638e-37	2.35151	1.8503	157.199	4.62992e-36	1.4301e-35	2.39361	0.2718	11.1288	7.37232e-25	1.89192e-24	45.2842
TRBV19	8.47695	2.90372	0.22659	12.8149	1.35396e-37	4.15115e-37	2.8616	-1.85766	162.348	3.4723e-37	1.10172e-36	2.53236	-3.59171	14.7359	1.23798e-38	4.83564e-38	77.0002
KRT8P48	6.04012	2.97378	0.232351	12.7986	1.66828e-37	5.10475e-37	2.85702	-2.24277	163.081	2.40204e-37	7.63896e-37	2.32479	-3.84421	13.0207	6.43837e-32	2.0423e-31	61.6423
LINC00944	3.79406	2.81191	0.220053	12.7783	2.1669e-37	6.61419e-37	2.75747	-2.70969	187.056	1.39597e-42	4.9983e-42	2.21736	-4.12576	14.4666	1.45146e-37	5.49911e-37	74.5624
RP11-89C3.4	4.83145	2.32445	0.182322	12.7491	3.15181e-37	9.58629e-37	2.27799	-2.47733	181.041	2.87209e-41	9.97719e-41	2.2957	-3.70835	16.5782	4.75582e-46	2.37323e-45	93.977
THEMIS	31.6087	2.14589	0.168402	12.7427	3.42436e-37	1.04063e-36	2.13332	-0.189211	151.891	6.69337e-35	2.0119e-34	2.00872	-1.53465	11.7691	3.3848e-27	9.31176e-27	50.7562
ADGRE3	11.8411	3.02232	0.23719	12.7422	3.4459e-37	1.04705e-36	3.00054	-1.44556	153.726	2.65881e-35	8.07793e-35	3.20857	-3.3518	17.5892	3.62699e-50	2.10228e-49	103.401
RP11-465L10.10	7.70443	2.60631	0.204546	12.7419	3.45867e-37	1.0508e-36	2.51472	-1.99695	157.138	4.77413e-36	1.47428e-35	2.07087	-3.47189	13.3588	3.19385e-33	1.05237e-32	64.619
TMEM52B	17.9093	2.13722	0.167766	12.7393	3.5764e-37	1.08604e-36	2.11201	-0.933989	153.653	2.75817e-35	8.37569e-35	2.45768	-2.24414	15.4413	1.86953e-41	8.01354e-41	83.4245
CCIN	6.57809	2.23035	0.175186	12.7313	3.96147e-37	1.20209e-36	2.21842	-2.16529	171.909	2.83328e-39	9.40425e-39	2.27368	-3.41555	14.8796	3.3145e-39	1.32106e-38	78.308
CH17-360D5.1	6.90534	3.76331	0.295968	12.7153	4.86439e-37	1.47338e-36	3.53659	-2.07247	139.463	3.48873e-32	9.86209e-32	2.20672	-4.07078	10.9263	3.93343e-24	9.89975e-24	43.8626
RP11-616M22.11	3.17545	2.79221	0.220176	12.6817	7.46862e-37	2.25287e-36	2.70153	-2.8983	189.987	3.19986e-43	1.16096e-42	2.05831	-4.24317	15.4343	1.99442e-41	8.54294e-41	83.4012
CTA-384D8.34	3.92407	2.80134	0.221281	12.6596	9.89556e-37	2.97874e-36	2.65057	-2.68016	183.804	7.15863e-42	2.52279e-41	2.24901	-4.0443	15.1688	2.3149e-40	9.55792e-40	80.962
CTC-231O11.1	31.0058	2.24983	0.17776	12.6565	1.02927e-36	3.09715e-36	2.20529	-0.240368	146.537	9.9066e-34	2.8981e-33	2.23223	-1.68407	13.0324	5.80081e-32	1.84171e-31	61.6666
TLR8	71.3903	2.03637	0.161032	12.6457	1.18177e-36	3.55388e-36	2.04503	0.93354	149.111	2.71222e-34	8.04242e-34	2.14208	-0.362569	12.0975	2.03689e-28	5.81957e-28	53.4726
CTD-2369P2.8	21.2082	2.52089	0.199822	12.6157	1.73043e-36	5.18692e-36	2.32214	-0.815992	139.952	2.7276e-32	7.72282e-32	2.54244	-2.34239	14.068	5.43718e-36	1.94933e-35	70.9164
CCL3L3	30.0193	2.27033	0.180501	12.578	2.79096e-36	8.3246e-36	2.22143	-0.286903	145.085	2.05732e-33	5.97698e-33	2.61365	-1.76795	14.2487	1.05598e-36	3.87483e-36	72.5218
PALM2-AKAP2	119.659	2.56467	0.204198	12.5597	3.51614e-36	1.04625e-35	2.60195	1.66659	143.565	4.42364e-33	1.27651e-32	3.45992	-0.229512	12.5677	3.44998e-30	1.03637e-29	57.5216
EVPLL	6.17713	3.62383	0.289024	12.5382	4.61516e-36	1.37064e-35	3.50935	-2.21417	150.199	1.56805e-34	4.67477e-34	2.18619	-4.1907	11.2615	2.44351e-25	6.36071e-25	46.6188
ULBP1	13.3075	2.05026	0.163989	12.5024	7.23945e-36	2.14029e-35	2.03972	-1.33105	150.222	1.55066e-34	4.62461e-34	2.13538	-2.55349	12.6674	1.4429e-30	4.38433e-30	58.5152
ARAP1-AS1	65.7068	3.97789	0.319506	12.4502	1.39582e-35	4.09881e-35	3.86284	0.721613	128.317	9.56782e-30	2.55077e-29	4.93883	-2.22589	16.8889	2.59619e-47	1.35746e-46	96.8393
HLA-DQA2	270.49	2.81508	0.22751	12.3734	3.64014e-35	1.0609e-34	2.79902	2.78985	135.531	2.52735e-31	7.01898e-31	4.34676	0.362069	16.1557	2.45555e-44	1.15415e-43	89.9226
IGHV1-3	57.7962	4.71695	0.381391	12.3678	3.90532e-35	1.13738e-34	4.69732	0.661711	121.517	2.94427e-28	7.60208e-28	3.24396	-3.23027	9.9594	9.39772e-21	2.12973e-20	36.1281
OTOA	13.7443	2.20669	0.178678	12.3501	4.86465e-35	1.41296e-34	2.08725	-1.27515	143.787	3.95472e-33	1.14239e-32	2.59284	-2.5817	16.102	4.05095e-44	1.89077e-43	89.5371
BMPR1APS2	11.1982	2.62101	0.213032	12.3034	8.68473e-35	2.50902e-34	2.49969	-1.48427	134.281	4.74163e-31	1.30822e-30	2.14642	-3.06581	9.6191	1.32486e-19	2.90743e-19	33.511
HCAR3	27.4147	3.29895	0.268483	12.2874	1.05895e-34	3.05504e-34	3.25541	-0.378816	130.705	2.87282e-30	7.76392e-30	3.20073	-2.85514	13.6353	2.69045e-34	9.13532e-34	67.0552
RP11-18H21.1	6.86054	2.86972	0.233592	12.2852	1.08807e-34	3.13724e-34	2.78303	-2.1043	148.557	3.58392e-34	1.05943e-33	2.17154	-3.81412	12.8762	2.3054e-31	7.18171e-31	60.3764
CD1B	6.69785	2.87416	0.234596	12.2515	1.64902e-34	4.74196e-34	2.81518	-2.12703	148.914	2.99429e-34	8.87352e-34	2.33315	-3.82287	13.3175	4.61474e-33	1.51272e-32	64.2593
MIXL1	3.68893	2.55599	0.209554	12.1973	3.21488e-34	9.1958e-34	2.51411	-2.74148	170.31	6.32976e-39	2.08233e-38	2.13132	-4.09716	14.4939	1.13138e-37	4.30153e-37	74.8101
HTRA4	13.6346	2.4004	0.196822	12.1958	3.27266e-34	9.35998e-34	2.36853	-1.2859	141.429	1.29607e-32	3.69618e-32	2.93313	-2.84308	17.3211	4.50014e-49	2.5071e-48	100.891
WT1	49.3866	2.41955	0.198397	12.1955	3.28579e-34	9.39645e-34	2.39695	0.40463	136.071	1.92478e-31	5.3593e-31	2.73624	-1.36987	12.3953	1.54967e-29	4.57822e-29	56.0966
GZMB	58.5081	2.24387	0.184758	12.1449	6.10409e-34	1.73601e-33	2.3421	0.615408	155.537	1.06873e-35	3.27544e-35	3.06266	-1.0124	16.8498	3.74252e-47	1.94497e-46	96.4411
CASC9	22.04	4.13703	0.342048	12.0949	1.12403e-33	3.17818e-33	4.04335	-0.690547	119.389	8.60768e-28	2.20166e-27	2.40104	-3.67391	8.45469	7.49786e-16	1.46621e-15	24.9972
AC092580.4	4.45777	2.36321	0.195762	12.0719	1.48715e-33	4.19868e-33	2.30237	-2.56843	162.007	4.12281e-37	1.30678e-36	2.16536	-3.86747	14.9385	1.92972e-39	7.74602e-39	78.8529
RP1-241P17.4	15.2806	2.1772	0.181277	12.0103	3.13584e-33	8.80141e-33	2.0914	-1.1284	133.429	7.2833e-31	1.99924e-30	2.29532	-2.48437	11.6757	7.48766e-27	2.03755e-26	50.0191
CCR3	4.80347	2.86531	0.242048	11.8378	2.48971e-32	6.87445e-32	2.80423	-2.46661	146.554	9.82415e-34	2.87466e-33	2.07843	-4.10825	12.7437	7.38772e-31	2.26643e-30	59.2259
HIST1H3D	6.80366	2.52484	0.213555	11.8229	2.97164e-32	8.19512e-32	2.43239	-2.14206	135.385	2.72029e-31	7.54889e-31	2.00945	-3.66881	11.9337	8.30555e-28	2.33087e-27	52.2465
GJA3	13.7771	2.32032	0.197389	11.7551	6.65133e-32	1.81933e-31	2.27593	-1.27546	128.528	8.6028e-30	2.29695e-29	2.19438	-2.84701	11.9023	1.08696e-27	3.03604e-27	51.9511
TRBV7-9	4.51453	2.63017	0.224055	11.7389	8.04794e-32	2.19651e-31	2.55285	-2.55701	144.074	3.42303e-33	9.89721e-33	2.03762	-4.04134	13.1019	3.13699e-32	1.00367e-31	62.3613
TRAV12-2	3.68108	2.86299	0.245422	11.6656	1.91031e-31	5.16888e-31	2.80802	-2.73044	150.944	1.0781e-34	3.22456e-34	2.09616	-4.28013	13.3181	4.59316e-33	1.50585e-32	64.2722
CXCL8	819.09	2.14073	0.183809	11.6465	2.39176e-31	6.45261e-31	2.14488	4.38734	125.748	3.49062e-29	9.19049e-29	2.54014	2.7842	11.1681	5.32079e-25	1.37126e-24	45.3692
ADGRG7	49.3788	3.62561	0.314207	11.5389	8.39774e-31	2.23403e-30	2.59945	0.512947	54.9837	1.21531e-13	2.17167e-13	3.78817	-2.88541	14.2291	1.26149e-36	4.61803e-36	72.3824
CTB-31O20.3	38.1101	2.81514	0.244411	11.5181	1.06988e-30	2.84161e-30	2.70398	-0.0352639	118.24	1.53633e-27	3.90668e-27	3.23533	-2.05192	12.5943	2.73627e-30	8.24166e-30	57.8549
RP11-109L13.1	8.95693	3.10619	0.270209	11.4955	1.38944e-30	3.67974e-30	2.88274	-1.78447	119.609	7.70441e-28	1.97286e-27	2.1731	-3.72423	9.99716	6.98454e-21	1.58909e-20	36.4459
TIFAB	16.9461	2.90371	0.256567	11.3176	1.074e-29	2.78638e-29	2.50522	-0.959223	83.2618	7.1877e-20	1.51086e-19	3.4376	-3.096	16.8551	3.56262e-47	1.85225e-46	96.5442
RP5-1091N2.9	5.82503	2.09811	0.185915	11.2853	1.55035e-29	4.0084e-29	2.06849	-2.29052	134.477	4.29748e-31	1.18633e-30	2.17771	-3.56114	15.2063	1.6385e-40	6.80475e-40	81.2999
XCL2	6.94355	2.09754	0.186211	11.2643	1.9689e-29	5.0784e-29	2.03171	-2.07981	129.491	5.29539e-30	1.42305e-29	2.29962	-3.36848	15.2654	9.49889e-41	3.97685e-40	81.8383
IGKV6D-21	10.7805	3.81502	0.342767	11.1301	8.95751e-29	2.2752e-28	3.62573	-1.23169	91.8212	9.48712e-22	2.09437e-21	2.40632	-4.03253	10.4113	2.59469e-22	6.16719e-22	39.7107
MAGED4	370.746	2.1762	0.195649	11.123	9.69669e-29	2.46119e-28	2.18083	3.22712	120.24	5.60454e-28	1.43841e-27	3.06723	1.5488	12.7167	9.36662e-31	2.86291e-30	58.6779
CDC20B	4.38942	2.60414	0.234667	11.0972	1.29446e-28	3.27887e-28	2.58041	-2.54912	134.541	4.16112e-31	1.1492e-30	2.17218	-4.09627	13.5076	8.45088e-34	2.82808e-33	65.9502
FPR2	42.0324	2.16648	0.196958	10.9997	3.83425e-28	9.61408e-28	2.14937	0.191171	112.312	3.05284e-26	7.50842e-26	2.02112	-1.51542	9.49613	3.40345e-19	7.3693e-19	32.4866
RP11-6N17.6	28.4251	2.42336	0.220838	10.9734	5.12816e-28	1.28274e-27	2.2792	-0.433999	106.985	4.48594e-25	1.07364e-24	2.32554	-2.12372	9.72353	5.91397e-20	1.30905e-19	34.2568
CTD-2574D22.6	9.96349	2.19369	0.200179	10.9586	6.04044e-28	1.50865e-27	2.07322	-1.65972	106.363	6.14013e-25	1.46475e-24	2.08006	-3.07311	10.4553	1.82043e-22	4.34854e-22	40.0345
RP11-468E2.1	532.717	2.68674	0.246343	10.9065	1.07313e-27	2.66255e-27	2.72427	3.76661	109.236	1.44069e-25	3.4857e-25	5.09895	1.33952	15.3609	3.93316e-41	1.66862e-40	82.5353
RP11-579D7.2	21.6083	3.34704	0.308076	10.8643	1.70479e-27	4.2142e-27	3.2649	-0.759673	107.237	3.94988e-25	9.46712e-25	3.39036	-3.08475	12.7721	5.76095e-31	1.7735e-30	59.4409
IGHV3-48	23.6197	3.31543	0.307122	10.7952	3.62822e-27	8.89537e-27	3.57441	-0.292217	112.928	2.23766e-26	5.521e-26	2.81314	-3.30246	11.1773	4.92724e-25	1.27102e-24	45.8983
LRRC55	53.2641	2.08838	0.193789	10.7766	4.44099e-27	1.08677e-26	2.08242	0.515524	108.072	2.592e-25	6.23299e-25	2.83738	-1.1482	14.0418	6.89438e-36	2.4604e-35	70.6258
XXbac-BPG116M5.17	34.2678	3.5038	0.32767	10.6931	1.09689e-26	2.65907e-26	3.48776	-0.0663902	100.949	9.44003e-24	2.18601e-23	3.49673	-2.80761	11.5463	2.23791e-26	6.00883e-26	48.9433
CTD-2207O23.3	45.1552	3.97961	0.382489	10.4045	2.36425e-25	5.55882e-25	2.69892	0.407409	39.326	3.58628e-10	5.7739e-10	3.13474	-3.03767	9.52643	2.69929e-19	5.86045e-19	32.8006
TGIF2-C20orf24	21.7553	2.54201	0.246197	10.3251	5.42721e-25	1.26669e-24	2.51892	-0.680082	96.0903	1.0976e-22	2.4779e-22	2.77155	-2.57685	10.6594	3.49034e-23	8.52618e-23	41.6455
UGT1A9	4.93645	3.27364	0.31998	10.2308	1.44357e-24	3.33847e-24	3.03724	-2.49962	92.7602	5.90309e-22	1.31038e-21	2.01886	-4.33706	10.49	1.3771e-22	3.3032e-22	40.3469
RP11-609D21.3	141.633	2.44049	0.24318	10.0358	1.06128e-23	2.41037e-23	2.39082	1.82398	89.9123	2.48961e-21	5.43467e-21	3.33288	-0.392842	11.5182	2.83643e-26	7.59695e-26	48.5747
TCF23	11.0118	2.52319	0.251681	10.0254	1.17933e-23	2.67679e-23	2.50197	-1.53451	96.3167	9.78989e-23	2.21436e-22	2.36114	-3.51562	11.783	3.00688e-27	8.28311e-27	50.9643
RP4-738P15.6	39.6404	2.47808	0.251719	9.84463	7.23045e-23	1.61065e-22	2.85769	0.427157	107.267	3.89143e-25	9.32793e-25	2.53489	-1.99133	8.98941	1.54093e-17	3.17377e-17	28.7467
UGT1A4	6.03042	3.10091	0.315762	9.8204	9.19763e-23	2.04611e-22	2.91611	-2.2826	86.3626	1.49792e-20	3.20507e-20	2.0064	-4.21244	9.85549	2.11949e-20	4.75549e-20	35.36
SRGAP2D	23.6518	2.12207	0.217315	9.76494	1.59206e-22	3.52371e-22	2.10863	-0.546656	89.706	2.76316e-21	6.02548e-21	2.30941	-2.2273	9.47193	4.0944e-19	8.85071e-19	32.3488
TNFSF12-TNFSF13	71.376	2.95475	0.311658	9.48073	2.52501e-21	5.42797e-21	2.87287	0.841107	77.7677	1.159e-18	2.3601e-18	3.56291	-1.89815	11.2088	3.79142e-25	9.80777e-25	46.0929
RP11-649E7.5	248.596	2.76885	0.300001	9.22946	2.71999e-20	5.70778e-20	2.79796	2.67886	78.8881	6.57286e-19	1.34773e-18	3.20093	-0.281729	7.08731	7.49176e-12	1.29384e-11	15.7164
RP11-265N6.1	44.213	2.19629	0.242418	9.05993	1.30533e-19	2.69634e-19	2.15159	0.203899	76.7855	1.90571e-18	3.85849e-18	2.76848	-1.72038	10.0445	4.81065e-21	1.10085e-20	36.716
AC005786.7	75.6437	2.15533	0.239428	9.00201	2.21618e-19	4.55282e-19	2.07955	0.925264	73.32	1.10244e-17	2.19156e-17	3.06212	-1.04452	10.891	5.25807e-24	1.31656e-23	43.4332
RP11-256P1.1	19.2608	2.71849	0.315081	8.62792	6.24788e-18	1.23826e-17	2.58412	-0.931438	65.8536	4.85703e-16	9.2361e-16	2.68987	-3.16564	10.0187	5.89509e-21	1.34529e-20	36.5909
SLCO1B3	79.4004	2.69824	0.325516	8.28913	1.1408e-16	2.19472e-16	2.22741	1.13915	41.7353	1.04506e-10	1.7088e-10	3.08394	-2.43982	9.83288	2.52827e-20	5.65632e-20	35.115
AC005943.2	59.8533	2.05703	0.349544	5.88489	3.98308e-09	6.18071e-09	2.09916	0.66986	34.788	3.67637e-09	5.72267e-09	2.72901	-2.13702	7.38015	1.14501e-12	2.03055e-12	17.6992
PDCD4	17033.3	-3.28008	0.086832	-37.775	0	0	-3.24194	8.72075	1166.75	1.02826e-255	1.21584e-252	-3.26076	7.61928	-35.5234	1.49525e-118	6.18808e-116	260.348
AC016722.4	59.4536	-3.62002	0.0935562	-38.6935	0	0	-3.52849	0.584984	1236.19	8.34124e-271	1.38081e-267	-3.54408	-0.46245	-34.4913	4.83228e-115	1.3792e-112	252.141
MKNK1	5050.99	-3.44079	0.0797651	-43.1365	0	0	-3.39976	6.9626	1560.05	0	0	-3.52533	5.93529	-42.9766	2.9998e-142	1.8622e-138	314.854
WDFY2	1983.45	-2.48112	0.0660282	-37.5766	0	0	-2.43846	5.61728	1281.07	1.46806e-280	3.64535e-277	-2.59227	4.99417	-41.5902	4.72456e-138	2.34631e-134	305.192
GOLGA8B	20457	-4.78746	0.111012	-43.1255	0	0	-4.74089	8.97426	1357.55	3.52029e-297	1.74824e-293	-4.85611	7.03558	-37.2448	2.80488e-124	2.902e-121	273.52
PLIN5	2721.66	-5.55285	0.143808	-38.6131	0	0	-5.54557	6.07341	1073.99	1.48258e-235	8.59708e-233	-6.33661	3.59511	-41.2053	7.18043e-137	2.5471e-133	302.459
FER1L5	162.203	-5.07583	0.125689	-40.3841	0	0	-4.97592	2.01039	1193.59	1.51069e-261	2.20658e-258	-5.16302	0.0584048	-35.1307	3.18735e-117	1.05527e-114	257.185
RP11-64C12.5	19.4321	-7.15206	0.182703	-39.1459	0	0	-6.68221	-0.992888	1847.66	0	0	-5.57851	-3.14668	-43.4916	8.73809e-144	7.23251e-140	317.273
ANKRD62	32.9225	-6.21059	0.160529	-38.6884	0	0	-5.92848	-0.259988	1178.89	2.36515e-258	3.26273e-255	-5.79708	-2.54246	-36.1527	1.15602e-120	5.98024e-118	264.744
RP11-727A23.10	36.4764	-5.54646	0.135701	-40.8728	0	0	-5.39632	-0.112067	1360.95	6.44475e-298	4.00074e-294	-5.04193	-2.07812	-35.1604	2.52539e-117	8.47404e-115	257.177
PSMD6-AS2	90.9676	-3.98949	0.104706	-38.1017	0	0	-3.88573	1.18668	1169.92	2.1037e-256	2.61185e-253	-3.95561	-0.107524	-34.375	1.21174e-114	3.23534e-112	251.261
RP11-350N15.4	69.8805	-4.95546	0.122013	-40.6141	0	0	-4.82476	0.807446	1264.75	5.17457e-277	9.88382e-274	-4.84541	-0.979364	-36.8073	7.73801e-123	6.00445e-120	269.926
RP11-325K4.2	125.365	-3.80218	0.0994291	-38.2401	0	0	-3.71908	1.63465	1204.02	8.16227e-264	1.26673e-260	-3.60438	0.445182	-33.4233	2.37995e-111	4.88401e-109	243.755
[truncated: 1,158 more rows]

## Sheet: Table S2
Gene	coef	se	z	p	HR	HRse	HRz	HRp	HRCILL	HRCIUL
CALB2	0.162361	0.063227	2.5679	0.0102316	1.17628	0.0743729	2.37028	0.0177748	1.03919	1.33147
RP5-1025A1.3	-4.62401	2.09622	-2.20588	0.0273927	0.0098134	0.0205711	-48.1349	0	0.000161254	0.59721
RP11-550F7.1	1.15136	0.517524	2.22475	0.0260979	3.1625	1.63667	1.32128	0.186408	1.14687	8.72062
RP13-554M15.2	-1.05224	0.405101	-2.59748	0.00939101	0.349154	0.141443	-4.60148	4.19491e-06	0.157832	0.772395
PKMYT1	0.256519	0.100728	2.54666	0.010876	1.29242	0.130183	2.24625	0.024688	1.06088	1.57451
TMEM52	0.193277	0.0841262	2.29746	0.0215925	1.21322	0.102063	2.08908	0.0367008	1.0288	1.4307
KLK8	0.163113	0.0537618	3.03399	0.00241343	1.17717	0.0632868	2.79947	0.00511866	1.05944	1.30798
NCAPG	0.500799	0.120666	4.1503	3.32045e-05	1.65004	0.199103	3.26483	0.00109529	1.30252	2.09028
KLK10	0.196469	0.0535303	3.67025	0.000242313	1.2171	0.0651516	3.3322	0.00086162	1.09587	1.35173
AC009014.3	-0.34135	0.0937896	-3.63953	0.000273137	0.71081	0.0666666	-4.33785	1.43881e-05	0.591452	0.854255
SLC2A1	0.215837	0.0681709	3.16612	0.00154488	1.2409	0.0845932	2.84775	0.00440299	1.0857	1.41829
MASP2	-0.687244	0.28043	-2.45068	0.0142586	0.502961	0.141045	-3.52398	0.00042512	0.29029	0.871437
FCGR2B	0.186519	0.0838763	2.22374	0.0261661	1.20505	0.101075	2.02867	0.0424922	1.02237	1.42036
PHLDA2	0.169254	0.0687318	2.46252	0.0137963	1.18442	0.0814073	2.2654	0.0234879	1.03515	1.35522
EVPL	0.194939	0.0677656	2.87667	0.004019	1.21524	0.0823513	2.61364	0.00895823	1.06409	1.38785
NTM	0.19423	0.0865259	2.24476	0.0247835	1.21438	0.105075	2.04022	0.0413289	1.02495	1.43881
SERPINB3	0.124023	0.0484547	2.55956	0.0104804	1.13204	0.0548527	2.4072	0.0160752	1.02948	1.24482
FGFBP1	0.169815	0.0574086	2.95802	0.00309626	1.18509	0.0680341	2.72049	0.00651851	1.05897	1.32622
RP11-1143G9.5	-0.275572	0.135448	-2.03452	0.0418993	0.759138	0.102824	-2.34247	0.0191564	0.582139	0.989952
LIPJ	-3.21875	1.32546	-2.4284	0.0151658	0.0400051	0.0530252	-18.1045	0	0.00297768	0.537467
RP11-540B6.6	-0.456274	0.195757	-2.33082	0.0197631	0.63364	0.12404	-2.95357	0.00314121	0.431732	0.929976
RMI2	0.330935	0.125783	2.63099	0.00851367	1.39227	0.175124	2.23995	0.0250945	1.08807	1.78152
RAD54L	0.398041	0.120602	3.30045	0.00096529	1.48891	0.179565	2.72272	0.00647467	1.17547	1.88592
RGS20	0.329358	0.167572	1.96547	0.0493602	1.39008	0.232938	1.67459	0.0940153	1.00092	1.93053
GPR35	0.160284	0.0734636	2.18181	0.0291233	1.17384	0.0862348	2.01594	0.0438065	1.01643	1.35563
PTGS2	0.170874	0.0610643	2.79827	0.00513773	1.18634	0.0724432	2.57225	0.0101041	1.05252	1.33717
SLPI	0.151103	0.0664609	2.27357	0.0229919	1.16312	0.0773017	2.11013	0.0348471	1.02106	1.32494
AC129492.1	-0.723797	0.344877	-2.09871	0.0358424	0.484907	0.167233	-3.08008	0.00206944	0.24666	0.953276
TOR4A	0.239155	0.0998489	2.39517	0.0166128	1.27017	0.126826	2.13029	0.0331478	1.04441	1.54474
RP11-347I19.7	-0.542189	0.174094	-3.11434	0.00184355	0.581474	0.101231	-4.13436	3.5595e-05	0.413372	0.817936
CBY3	-4.50052	1.44045	-3.12439	0.00178173	0.0111032	0.0159935	-61.831	0	0.000659682	0.186878
KRT8P5	2.49302	0.845074	2.95007	0.00317705	12.0978	10.2235	1.08552	0.277694	2.30876	63.392
ADCY10P1	-0.418827	0.192898	-2.17123	0.0299136	0.657818	0.126892	-2.69664	0.00700426	0.450723	0.960066
CXCL8	0.147265	0.0604573	2.43585	0.0148568	1.15866	0.0700495	2.26498	0.0235138	1.02919	1.30442
ANTXR2	0.359923	0.114891	3.13273	0.00173189	1.43322	0.164664	2.63092	0.00851533	1.14424	1.79518
SPDEF	0.146849	0.0548084	2.67931	0.00737738	1.15818	0.063478	2.49187	0.0127072	1.04021	1.28952
GBP5	0.153346	0.0755933	2.02857	0.0425025	1.16573	0.0881213	1.88068	0.0600149	1.0052	1.35189
LINC00982	-0.172468	0.0855607	-2.01573	0.0438278	0.841585	0.0720067	-2.2	0.027807	0.711654	0.99524
XX-FW83563B9.5	-0.626158	0.301738	-2.07517	0.0379707	0.534642	0.161322	-2.88466	0.00391841	0.295953	0.965835
RP11-417E7.1	0.403361	0.179081	2.25239	0.0242976	1.49685	0.268058	1.85351	0.0638092	1.05376	2.12624
CENPE	0.616417	0.140178	4.39739	1.09558e-05	1.85228	0.259649	3.28244	0.00102914	1.4073	2.43796
KRT6A	0.135507	0.0364998	3.71255	0.00020518	1.14512	0.0417965	3.472	0.000516596	1.06606	1.23004
XDH	0.255182	0.0729885	3.49619	0.00047195	1.2907	0.094206	3.08575	0.00203039	1.11865	1.4892
CDH11	0.202132	0.0791319	2.55437	0.0106381	1.22401	0.0968581	2.31276	0.020736	1.04816	1.42936
RP11-400K9.4	0.257695	0.122976	2.09548	0.0361283	1.29394	0.159125	1.84726	0.0647102	1.0168	1.64662
NEK2	0.431673	0.114967	3.75476	0.000173505	1.53983	0.17703	3.04939	0.00229308	1.22917	1.929
CTHRC1	0.19772	0.0770956	2.5646	0.0103294	1.21862	0.0939503	2.32698	0.0199663	1.04772	1.4174
RP11-211G23.2	0.358093	0.127597	2.80643	0.00500936	1.4306	0.182541	2.35892	0.0183282	1.11406	1.83708
ALDH3A1	0.154806	0.0580389	2.66728	0.0076469	1.16743	0.0677565	2.47107	0.0134708	1.04191	1.30808
CRIP1	0.214849	0.088826	2.41876	0.0155734	1.23967	0.110115	2.17658	0.029512	1.0416	1.47542
RAC2	0.233688	0.10133	2.30621	0.0210989	1.26325	0.128005	2.05656	0.0397284	1.03571	1.54078
PBK	0.468033	0.123708	3.78337	0.000154719	1.59685	0.197543	3.02137	0.00251636	1.25304	2.035
IFNWP19	0.354773	0.14991	2.36657	0.017954	1.42586	0.213751	1.99231	0.0463376	1.06285	1.91284
RP11-197N18.2	-0.556183	0.159394	-3.48935	0.000484188	0.573393	0.0913956	-4.66769	3.04604e-06	0.419543	0.783663
FOXL1	0.200062	0.0673824	2.96905	0.00298723	1.22148	0.0823061	2.69091	0.00712582	1.07036	1.39393
ECM1	0.202943	0.0741222	2.73796	0.00618219	1.225	0.0907999	2.47801	0.0132117	1.05936	1.41654
MMP11	0.142938	0.0514722	2.777	0.00548635	1.15366	0.0593814	2.58766	0.00966314	1.04295	1.27612
TP53INP1	-0.309067	0.14841	-2.08253	0.0372943	0.734131	0.108952	-2.44023	0.0146779	0.548842	0.981975
SP6	0.328644	0.111585	2.94522	0.00322725	1.38908	0.155001	2.51019	0.0120666	1.11621	1.72866
RP11-286N22.16	-0.961019	0.418392	-2.29694	0.0216224	0.382503	0.160036	-3.85849	0.00011409	0.168461	0.868501
KLK7	0.121543	0.0426229	2.85159	0.00435011	1.12924	0.0481313	2.68511	0.00725064	1.03874	1.22763
ADAM8	0.173504	0.0820895	2.1136	0.0345496	1.18947	0.0976427	1.9404	0.0523312	1.01269	1.3971
FAM95B1	-0.222859	0.112073	-1.98851	0.0467555	0.800228	0.0896842	-2.22751	0.0259135	0.642417	0.996806
HTR1D	0.215183	0.0880603	2.44359	0.0145419	1.24009	0.109203	2.19857	0.0279087	1.04351	1.4737
TREM1	0.22278	0.0833402	2.67314	0.00751444	1.24955	0.104137	2.39631	0.0165609	1.06124	1.47127
KB-1572G7.2	-0.480096	0.188907	-2.54144	0.0110397	0.618724	0.116881	-3.26208	0.00110599	0.427266	0.895973
ADAMTS12	0.241346	0.0781475	3.08835	0.00201274	1.27296	0.0994788	2.74392	0.006071	1.09218	1.48366
S100A6	0.234064	0.088789	2.63618	0.0083846	1.26372	0.112205	2.35039	0.018754	1.06188	1.50394
TMPRSS4	0.240729	0.0676354	3.55922	0.000371957	1.27218	0.0860442	3.16322	0.00156035	1.11423	1.45251
S100A3	0.315088	0.145195	2.17011	0.0299987	1.37038	0.198972	1.86147	0.062678	1.03098	1.82151
CH17-360D5.1	0.387817	0.176868	2.19269	0.0283294	1.47376	0.260661	1.81754	0.0691351	1.04202	2.08438
RP11-499P20.2	-1.09019	0.308725	-3.53128	0.000413554	0.336151	0.103778	-6.3968	1.58665e-10	0.183547	0.615633
DLGAP5	0.553278	0.121075	4.5697	4.88422e-06	1.73894	0.210543	3.5097	0.000448609	1.3716	2.20468
HRASLS2	0.314972	0.0781105	4.03239	5.52124e-05	1.37022	0.107029	3.45908	0.000542018	1.17572	1.5969
TMC3-AS1	-2.13386	0.844334	-2.52727	0.0114952	0.118379	0.0999515	-8.82048	0	0.0226244	0.619403
RP11-399J13.2	-4.23182	1.97523	-2.14245	0.0321575	0.0145259	0.0286919	-34.3467	0	0.000302569	0.697365
FBXO39	0.877805	0.350377	2.50531	0.0122343	2.40561	0.842872	1.66765	0.0953859	1.21055	4.78043
C2orf66	-3.08178	0.963608	-3.19817	0.00138303	0.0458774	0.0442079	-21.5826	0	0.00694024	0.303266
LUZP2	0.24989	0.102165	2.44594	0.0144475	1.28388	0.131168	2.16427	0.0304434	1.0509	1.56852
TTK	0.475203	0.120401	3.94685	7.91863e-05	1.60834	0.193645	3.14152	0.00168072	1.27026	2.0364
SNHG23	-1.97483	0.762773	-2.58902	0.009625	0.138784	0.105861	-8.13535	4.44089e-16	0.0311219	0.618891
VASP	0.341844	0.12768	2.67734	0.00742083	1.40754	0.179715	2.2677	0.0233472	1.09592	1.80777
CSPG5	-0.432816	0.179905	-2.40581	0.0161367	0.64868	0.116701	-3.01044	0.00260866	0.455927	0.922923
MYEOV	0.289884	0.0623822	4.6469	3.36961e-06	1.33627	0.0833596	4.034	5.48365e-05	1.18248	1.51006
GOLGA6L10	-0.381934	0.181706	-2.10193	0.0355593	0.68254	0.124022	-2.55971	0.0104759	0.478035	0.974534
NTF4	0.258075	0.106393	2.42568	0.0152797	1.29444	0.137718	2.13795	0.0325207	1.0508	1.59456
ABCB4	-0.453661	0.1485	-3.05495	0.00225096	0.635298	0.0943419	-3.86575	0.000110749	0.474869	0.849926
WNT7A	0.233639	0.0600986	3.88759	0.000101246	1.26319	0.0759159	3.46684	0.00052662	1.12282	1.4211
RP11-817I4.1	0.52123	0.254021	2.05192	0.0401778	1.6841	0.427797	1.59912	0.109794	1.02363	2.77071
WI2-87327B8.2	0.802164	0.247243	3.24443	0.00117686	2.23036	0.551442	2.23117	0.0256698	1.37379	3.62101
TARDBPP2	-2.37445	1.14265	-2.07802	0.0377073	0.0930656	0.106341	-8.52852	0	0.00991207	0.873804
PITX1	0.156455	0.0656519	2.3831	0.0171678	1.16936	0.0767705	2.20603	0.0273822	1.02817	1.32993
TSPAN5	0.267376	0.124777	2.14284	0.0321258	1.30653	0.163025	1.88028	0.0600697	1.02308	1.66851
TP63	0.188081	0.0746224	2.52044	0.011721	1.20693	0.0900641	2.2976	0.0215846	1.04271	1.39702
PLAC8	0.207966	0.0709503	2.93115	0.00337711	1.23117	0.087352	2.64643	0.00813455	1.07134	1.41485
CXCL9	0.156332	0.051612	3.02899	0.00245375	1.16921	0.0603455	2.80409	0.00504582	1.05672	1.29368
AKR1B10	0.128351	0.0466852	2.7493	0.00597232	1.13695	0.0530788	2.58017	0.00987512	1.03754	1.24589
TSPAN8	0.186379	0.0637978	2.9214	0.00348467	1.20488	0.0768686	2.66531	0.00769181	1.06326	1.36536
SULT1A4	0.253862	0.0907559	2.7972	0.00515483	1.28899	0.116984	2.47038	0.0134971	1.07894	1.53993
TNS4	0.179337	0.0511563	3.50566	0.00045547	1.19642	0.0612046	3.20929	0.00133061	1.08228	1.3226
RP11-348N5.9	-2.21775	0.663004	-3.34501	0.000822802	0.108854	0.0721703	-12.3478	0	0.029682	0.399201
IFI16	0.342674	0.118129	2.90085	0.00372146	1.40871	0.166409	2.45606	0.0140471	1.11756	1.77571
PI3	0.135918	0.0529402	2.56738	0.010247	1.14559	0.0606477	2.40055	0.0163705	1.03268	1.27084
MSX2	0.21853	0.0892083	2.44966	0.0142992	1.24425	0.110997	2.20047	0.0277733	1.04465	1.48197
FAM72B	0.574074	0.173816	3.30278	0.000957322	1.77549	0.308607	2.51286	0.0119757	1.26289	2.49614
BEAN1	0.226859	0.0822064	2.75963	0.00578662	1.25465	0.103141	2.469	0.0135493	1.06795	1.474
RP11-1166P10.1	0.711973	0.257306	2.76703	0.00565693	2.03801	0.524392	1.97945	0.0477649	1.2308	3.37462
FAM83D	0.255795	0.0732599	3.49161	0.000480112	1.29149	0.0946143	3.08081	0.00206441	1.11875	1.4909
RHOF	0.500705	0.102685	4.87614	1.08182e-06	1.64988	0.169418	3.83598	0.000125063	1.34911	2.01771
OACYLP	1.20158	0.472095	2.54522	0.010921	3.32538	1.5699	1.48123	0.138545	1.31824	8.3886
GBP2	0.597006	0.155681	3.83479	0.000125671	1.81667	0.282822	2.88758	0.00388216	1.33894	2.46486
TOP2A	0.46913	0.112334	4.17622	2.96393e-05	1.5986	0.179577	3.33341	0.000857892	1.28269	1.99232
RP13-516M14.2	-1.57797	0.545824	-2.89098	0.00384037	0.206394	0.112655	-7.04458	1.86018e-12	0.0708094	0.601594
ANXA1	0.334936	0.0930355	3.60009	0.000318106	1.39785	0.13005	3.05922	0.00221912	1.16485	1.67746
UCN2	0.358093	0.13312	2.69001	0.00714499	1.4306	0.190441	2.26106	0.0237553	1.10206	1.85707
SLC25A27	-0.45139	0.115133	-3.92059	8.83325e-05	0.636742	0.0733102	-4.95508	7.23019e-07	0.508115	0.797931
NCAPH	0.488779	0.129655	3.76985	0.000163344	1.63032	0.211379	2.98196	0.00286409	1.26448	2.10202
ARHGAP42	0.517183	0.139411	3.70977	0.000207449	1.6773	0.233834	2.89649	0.00377368	1.27627	2.20433
MAPK8IP1	-0.363545	0.10378	-3.50302	0.000460007	0.695207	0.0721489	-4.2245	2.39476e-05	0.567252	0.852025
EMP1	0.300247	0.0934438	3.21314	0.00131294	1.35019	0.126167	2.77563	0.00550953	1.12423	1.62157
RN7SKP70	-4.25432	1.84487	-2.30603	0.0211089	0.0142027	0.0262021	-37.6228	0	0.000381958	0.528112
SLC52A3	0.310342	0.0996684	3.11375	0.00184727	1.36389	0.135937	2.67692	0.0074303	1.12187	1.65813
CST6	0.115534	0.0540063	2.13926	0.0324144	1.12247	0.0606206	2.02031	0.0433513	1.00973	1.2478
FAM72D	0.446065	0.175745	2.53814	0.0111442	1.56215	0.27454	2.04762	0.0405975	1.10695	2.20454
DEPDC1	0.504718	0.114666	4.40164	1.07435e-05	1.65652	0.189946	3.45634	0.000547565	1.3231	2.07396
VDAC1P2	2.18018	0.970884	2.24556	0.0247324	8.84787	8.59026	0.913578	0.360939	1.31953	59.3276
LINC00520	0.469743	0.155834	3.01439	0.002575	1.59958	0.249269	2.40537	0.0161563	1.17858	2.17096
DSG3	0.206698	0.0487652	4.23863	2.24886e-05	1.22961	0.0599622	3.82926	0.00012853	1.11753	1.35293
RP11-111M22.4	-2.2584	0.606005	-3.7267	0.000194004	0.104518	0.0633383	-14.1381	0	0.0318682	0.342786
FAM83A	0.225431	0.0461901	4.88051	1.05812e-06	1.25286	0.0578698	4.36951	1.24526e-05	1.14442	1.37158
FOXJ1	-0.164716	0.0634597	-2.59559	0.00944273	0.848135	0.0538224	-2.8216	0.00477849	0.748941	0.960466
LDHAP3	0.498081	0.204012	2.44143	0.0146292	1.64556	0.335714	1.92295	0.0544866	1.10321	2.45453
RP11-829H16.3	-5.53324	2.0524	-2.69599	0.00701806	0.00395317	0.00811347	-122.765	0	7.07848e-05	0.220775
HRH1	0.524915	0.134883	3.89164	9.95703e-05	1.69031	0.227994	3.02777	0.00246364	1.29764	2.20181
TSPAN1	0.266181	0.0826399	3.22097	0.00127759	1.30497	0.107843	2.82792	0.00468513	1.10983	1.53442
RP1-168L15.5	-6.48082	1.48766	-4.3564	1.32221e-05	0.00153256	0.00227991	-437.941	0	8.30082e-05	0.0282951
CENPA	0.55038	0.133409	4.1255	3.6993e-05	1.73391	0.23132	3.17271	0.00151022	1.33496	2.25209
LINC01559	0.249389	0.0615508	4.05176	5.08339e-05	1.28324	0.0789846	3.58603	0.000335746	1.13741	1.44777
FAM72A	0.421398	0.17793	2.36834	0.0178683	1.52409	0.271181	1.93262	0.0532829	1.07537	2.16005
RGS11	-0.407738	0.104291	-3.90963	9.24395e-05	0.665153	0.0693694	-4.82701	1.38595e-06	0.542187	0.816007
MEG8	-1.69519	0.727754	-2.32934	0.0198411	0.183565	0.13359	-6.11149	9.8706e-10	0.0440884	0.764285
UGT1A10	0.177462	0.0523571	3.38946	0.000700314	1.19418	0.0625239	3.10573	0.00189807	1.07772	1.32324
ENTHD1	0.562864	0.152632	3.68772	0.000226276	1.75569	0.267975	2.82001	0.00480218	1.30175	2.36793
SERTAD4	0.29114	0.116969	2.48903	0.0128091	1.33795	0.156499	2.15945	0.0308153	1.06384	1.68269
HEPH	0.18415	0.0829324	2.22049	0.0263856	1.2022	0.099701	2.02803	0.0425572	1.02184	1.41439
BLACAT1	0.164287	0.0769116	2.13605	0.032675	1.17855	0.0906445	1.96982	0.0488593	1.01364	1.3703
TPM4	0.652453	0.183761	3.55055	0.000384433	1.92024	0.352867	2.60791	0.00910964	1.33949	2.7528
TRIM73	-0.416798	0.189153	-2.2035	0.0275598	0.659154	0.124681	-2.73374	0.00626186	0.454967	0.95498
KIAA1875	-0.406969	0.156977	-2.59254	0.00952697	0.665665	0.104494	-3.19956	0.00137635	0.489369	0.905471
ACSL5	0.259511	0.0781187	3.32201	0.000893728	1.2963	0.101265	2.92595	0.0034341	1.11227	1.51077
CENPF	0.438227	0.113025	3.87726	0.00010564	1.54996	0.175184	3.13931	0.00169344	1.24197	1.93431
UGT1A6	0.139776	0.0564069	2.47799	0.0132126	1.15002	0.0648689	2.3126	0.0207447	1.02965	1.28445
ANXA2P2	0.506921	0.129789	3.90574	9.39384e-05	1.66017	0.215471	3.06384	0.00218513	1.28729	2.14106
MCOLN3	-0.369992	0.106373	-3.47826	0.000504675	0.69074	0.0734758	-4.20901	2.56497e-05	0.560751	0.850862
CDNF	-0.545274	0.273616	-1.99284	0.0462785	0.579683	0.158611	-2.65	0.00804928	0.339069	0.991044
MYH16	0.342902	0.0852615	4.02176	5.7764e-05	1.40903	0.120136	3.40472	0.000662308	1.19219	1.66531
EPHX2	-0.312673	0.109304	-2.86057	0.00422881	0.731489	0.079955	-3.35827	0.000784308	0.590429	0.90625
GPR19	-0.463258	0.218032	-2.12473	0.0336093	0.62923	0.137192	-2.70256	0.0068808	0.410413	0.964714
RP11-7F17.8	-0.93752	0.236354	-3.96659	7.29097e-05	0.391598	0.0925559	-6.57335	4.91951e-11	0.246408	0.622337
IL1RN	0.285211	0.0744727	3.82974	0.000128281	1.33004	0.0990519	3.33202	0.000862194	1.14941	1.53906
RP13-650J16.1	-4.18092	1.72629	-2.4219	0.0154395	0.0152845	0.0263855	-37.3204	0	0.000518591	0.450479
YWHAZP2	2.02047	0.684816	2.95039	0.00317378	7.54187	5.16479	1.26663	0.205288	1.97044	28.8666
TMEM158	0.220756	0.0888555	2.48443	0.0129757	1.24702	0.110804	2.22932	0.0257926	1.04771	1.48425
RP11-54H7.4	0.188425	0.0494084	3.81363	0.000136942	1.20735	0.0596531	3.47588	0.000509184	1.09591	1.33011
CTB-43E15.2	-1.68382	0.778299	-2.16346	0.0305056	0.185663	0.144501	-5.63549	1.74558e-08	0.0403865	0.853523
CGB8	0.1522	0.0575444	2.64491	0.00817128	1.16439	0.0670042	2.45347	0.0141487	1.0402	1.30341
TMC7	0.342585	0.0968394	3.53766	0.000403693	1.40858	0.136406	2.99534	0.00274139	1.16507	1.70299
MISP	0.199951	0.0871264	2.29495	0.0217358	1.22134	0.106411	2.08007	0.037519	1.02962	1.44877
TPX2	0.459215	0.105755	4.34225	1.41031e-05	1.58283	0.167393	3.48182	0.000498011	1.28652	1.94739
LAMC2	0.330555	0.0795595	4.15481	3.25558e-05	1.39174	0.110726	3.53792	0.000403297	1.19079	1.62659
CYP2C18	0.195733	0.0625185	3.1308	0.00174331	1.2162	0.0760351	2.84345	0.00446281	1.07594	1.37474
ZRSR1	-1.13737	0.506435	-2.24584	0.0247141	0.32066	0.162394	-4.1833	2.87313e-05	0.118841	0.865213
RP11-411K7.1	1.00272	0.217905	4.60163	4.19196e-06	2.72568	0.593939	2.90548	0.00366686	1.77825	4.17788
RP11-462L8.1	0.354378	0.141899	2.49739	0.012511	1.42529	0.202248	2.10283	0.0354803	1.07924	1.8823
LINC00472	0.523171	0.205663	2.54383	0.0109645	1.68737	0.347029	1.98072	0.0476221	1.12759	2.52505
RPS20P22	-1.60265	0.761614	-2.10428	0.0353544	0.201363	0.153361	-5.20757	1.9133e-07	0.0452577	0.895915
AK4	0.274847	0.0898797	3.05794	0.00222864	1.31633	0.118311	2.6737	0.00750193	1.10372	1.56989
CTD-2240J17.4	-6.21214	2.74486	-2.26319	0.0236241	0.00200495	0.00550331	-181.345	0	9.24006e-06	0.435043
CBFA2T3	-0.258637	0.113836	-2.27201	0.0230862	0.772103	0.0878934	-2.59287	0.00951776	0.6177	0.965102
KIF26B	0.222889	0.0941869	2.36645	0.0179594	1.24968	0.117704	2.12128	0.0338986	1.03903	1.50304
CDCA2	0.476633	0.140473	3.39305	0.000691188	1.61064	0.226252	2.69895	0.00695596	1.223	2.12114
RP11-863K10.7	-2.5333	0.832792	-3.04194	0.00235059	0.0793963	0.0661206	-13.9231	0	0.0155212	0.406138
UBD	0.14163	0.058002	2.44181	0.0146139	1.15215	0.0668271	2.27677	0.0227997	1.02834	1.29086
SULT2B1	0.20505	0.0785622	2.61004	0.00905323	1.22759	0.0964419	2.35983	0.0182832	1.0524	1.43194
LINC01436	0.270437	0.110349	2.45074	0.0142561	1.31054	0.144617	2.14732	0.0317682	1.05565	1.62697
BTNL9	-0.427135	0.119234	-3.58232	0.000340551	0.652375	0.0777854	-4.46902	7.85777e-06	0.516422	0.824119
RP5-944M2.1	6.92159	2.56195	2.70168	0.00689891	1013.93	2597.64	0.389942	0.696579	6.68759	153726
SERPINB7	0.25667	0.0695171	3.69218	0.000222338	1.29262	0.0898591	3.25641	0.0011283	1.12797	1.4813
LRRC15	0.120866	0.0575883	2.0988	0.0358343	1.12847	0.0649869	1.97692	0.0480502	1.00803	1.26331
FAM169B	0.384563	0.18485	2.08041	0.0374882	1.46897	0.271539	1.72709	0.0841519	1.02251	2.11037
AXL	0.264655	0.105912	2.49883	0.0124604	1.30298	0.138001	2.19551	0.0281274	1.05873	1.60358
RP11-469H8.6	0.211109	0.105011	2.01034	0.0443952	1.23505	0.129694	1.81232	0.0699373	1.0053	1.51729
AL158801.1	0.996954	0.281068	3.54703	0.000389607	2.71002	0.761698	2.245	0.0247678	1.56216	4.70129
CCDC180	-1.10571	0.226875	-4.87365	1.09555e-06	0.330976	0.0750902	-8.9096	0	0.212168	0.516313
RP11-295P9.3	-0.523414	0.168649	-3.10356	0.00191205	0.592495	0.0999237	-4.07816	4.53928e-05	0.425726	0.824592
CAPN5	0.21971	0.0849713	2.5857	0.00971827	1.24572	0.10585	2.32135	0.0202678	1.05461	1.47145
ABCA10	-0.364065	0.146778	-2.48037	0.0131245	0.694846	0.101988	-2.99205	0.00277114	0.521135	0.92646
GOLGA8S	-1.02166	0.431872	-2.36566	0.0179981	0.359996	0.155472	-4.11651	3.84654e-05	0.154414	0.839283
PMEPA1	0.234246	0.0853101	2.74582	0.00603598	1.26396	0.107828	2.44793	0.014368	1.06934	1.49399
ABCA5	-0.568437	0.132338	-4.29535	1.74415e-05	0.56641	0.0749574	-5.78449	7.27338e-09	0.437003	0.734137
MMP2	0.202481	0.0721306	2.80715	0.00499822	1.22444	0.0883193	2.5412	0.0110473	1.06301	1.41037
CES4A	-0.424229	0.124501	-3.40744	0.000655744	0.654274	0.0814576	-4.24425	2.19328e-05	0.512607	0.835093
DDIAS	0.611357	0.160053	3.81971	0.00013361	1.84293	0.294967	2.85771	0.00426711	1.3467	2.52201
LINC00519	1.14794	0.44656	2.57064	0.0101512	3.15171	1.40743	1.52882	0.126308	1.31351	7.56238
NDC80	0.38262	0.113106	3.38284	0.000717391	1.46612	0.165827	2.81089	0.00494054	1.17461	1.82998
FBN1	0.165444	0.0754459	2.19288	0.0283161	1.17992	0.0890198	2.02108	0.0432712	1.01773	1.36795
NSUN5P1	-0.249668	0.100759	-2.47787	0.0132169	0.779059	0.0784974	-2.81463	0.00488339	0.639446	0.949154
SLCO1B3	0.149722	0.0654765	2.28665	0.0222164	1.16151	0.0760517	2.1237	0.0336952	1.02162	1.32056
HLA-B	0.263414	0.123188	2.13831	0.0324915	1.30137	0.160312	1.87986	0.0601268	1.02221	1.65675
FXYD3	0.15857	0.0748345	2.11895	0.0340949	1.17183	0.0876937	1.95949	0.0500559	1.01197	1.35696
RP11-138P22.1	-9.21995	3.2507	-2.8363	0.00456399	9.90434e-05	0.00032196	-3105.67	0	1.69365e-07	0.0579197
DIAPH2-AS1	0.827643	0.329206	2.51406	0.011935	2.28792	0.753196	1.70994	0.087277	1.20011	4.36175
RP11-49K24.8	-1.24878	0.608549	-2.05206	0.0401634	0.286854	0.174565	-4.08528	4.40234e-05	0.0870288	0.945494
SFRP2	0.156179	0.0580134	2.69212	0.00709989	1.16904	0.0678198	2.49243	0.0126874	1.04339	1.30981
YWHAZP4	0.964488	0.256811	3.75563	0.000172906	2.62344	0.67373	2.40964	0.0159684	1.58589	4.3398
CTC-231O11.1	-0.342545	0.151356	-2.26317	0.023625	0.709961	0.107457	-2.69912	0.00695239	0.527716	0.955145
ARNTL2	0.544138	0.110688	4.91598	8.83375e-07	1.72312	0.190728	3.79138	0.000149814	1.38707	2.14059
RAD51AP1	0.390337	0.11733	3.32682	0.00087843	1.47748	0.173353	2.75437	0.00588053	1.17395	1.85949
AP1S3	0.462287	0.115189	4.0133	5.98768e-05	1.5877	0.182886	3.21349	0.00131132	1.26683	1.98984
RP11-766N7.3	-3.02306	1.09644	-2.75716	0.00583057	0.048652	0.0533441	-17.8342	0	0.00567296	0.417246
NHS	0.345961	0.11333	3.0527	0.00226795	1.41335	0.160174	2.58061	0.00986251	1.13183	1.76488
CLCNKA	-0.433584	0.211189	-2.05306	0.0400666	0.648182	0.136889	-2.5701	0.0101669	0.428482	0.980531
CYP27C1	0.284198	0.0970171	2.92936	0.00339662	1.3287	0.128906	2.54988	0.0107759	1.09861	1.60697
RP11-304L19.1	0.262948	0.114466	2.29717	0.0216092	1.30076	0.148893	2.01997	0.0433866	1.03935	1.62791
RP11-430C7.5	-0.512049	0.260082	-1.9688	0.0489764	0.599266	0.155859	-2.57114	0.0101365	0.359946	0.997705
FAM166A	-2.68943	1.00642	-2.67226	0.00753416	0.0679198	0.0683561	-13.6357	0	0.00944773	0.488276
RIC3	-0.335902	0.089561	-3.75054	0.000176451	0.714693	0.0640086	-4.45733	8.29886e-06	0.599632	0.851832
MMP7	0.182425	0.0573059	3.18336	0.00145579	1.20012	0.0687742	2.90987	0.00361576	1.07262	1.34278
SPC24	0.347268	0.120089	2.89176	0.00383089	1.4152	0.169949	2.44306	0.0145633	1.1184	1.79075
TRIM31	0.143359	0.0560894	2.55591	0.010591	1.15414	0.0647352	2.38115	0.0172585	1.03399	1.28826
TPRG1	0.164085	0.0809782	2.02628	0.042736	1.17831	0.0954177	1.86877	0.0616546	1.00538	1.38099
AC018816.3	1.07555	0.309529	3.47481	0.000511221	2.93161	0.907417	2.12869	0.0332798	1.59821	5.37746
RP4-682C21.2	-1.89211	0.71019	-2.66422	0.00771661	0.150754	0.107064	-7.93214	2.10942e-15	0.037476	0.606434
CAMK2N2	-0.255029	0.106544	-2.39364	0.0166821	0.774894	0.0825606	-2.72655	0.00639998	0.628857	0.954846
OASL	0.302059	0.0752155	4.01592	5.92147e-05	1.35264	0.10174	3.46612	0.000528031	1.16724	1.5675
FIRRE	0.913176	0.225906	4.04228	5.29345e-05	2.49222	0.563009	2.65045	0.00803858	1.60065	3.88042
ABHD17C	0.27414	0.0912738	3.00349	0.00266904	1.3154	0.120062	2.62698	0.00861472	1.09993	1.57308
GYLTL1B	-0.246445	0.113849	-2.16467	0.0304131	0.781574	0.0889815	-2.45474	0.0140988	0.625261	0.976964
MT1X	0.238936	0.10787	2.21504	0.0267573	1.2699	0.136983	1.97029	0.0488052	1.0279	1.56887
DIAPH3	0.539749	0.13663	3.95045	7.80028e-05	1.71558	0.234399	3.05282	0.00226703	1.31253	2.24238
PLK1	0.420004	0.11678	3.59654	0.000322478	1.52197	0.177735	2.93677	0.00331652	1.2106	1.91341
AC133785.1	0.683126	0.265831	2.56978	0.0101764	1.98006	0.526361	1.86195	0.0626101	1.17599	3.33391
RP11-256I23.2	-2.52537	0.923093	-2.73577	0.00622341	0.0800285	0.0738738	-12.4533	0	0.0131071	0.488633
RP11-69E11.4	-0.661145	0.184882	-3.57604	0.000348841	0.51626	0.0954471	-5.06815	4.0171e-07	0.359333	0.74172
IL20RB	0.290154	0.0637769	4.54951	5.37702e-06	1.33663	0.0852463	3.94895	7.84959e-05	1.17957	1.5146
HPDL	0.278465	0.104182	2.67287	0.00752044	1.3211	0.137635	2.33299	0.0196487	1.0771	1.62038
AF186192.5	-1.00391	0.479134	-2.09525	0.0361486	0.366445	0.175576	-3.60843	0.000308058	0.143275	0.937235
RP11-486A14.1	0.418809	0.192665	2.17377	0.0297223	1.52015	0.29288	1.77599	0.0757349	1.04205	2.2176
AGAP5	-0.373611	0.163117	-2.29045	0.0219954	0.688245	0.112264	-2.77697	0.00548675	0.499916	0.94752
WDFY2	-0.490843	0.231173	-2.12327	0.0337312	0.61211	0.141503	-2.74121	0.00612142	0.389094	0.962952
GOLGA8B	-0.214226	0.0792909	-2.70178	0.00689704	0.807166	0.0640009	-3.01299	0.00258686	0.690987	0.942877
PLAT	0.168227	0.066078	2.54588	0.0109002	1.1832	0.0781838	2.34326	0.0191161	1.03948	1.34681
ANXA8	0.167554	0.0482993	3.46908	0.000522251	1.18241	0.0571096	3.19402	0.00140306	1.07561	1.29981
EGFL6	0.247103	0.106737	2.31506	0.0206098	1.28031	0.136657	2.0512	0.0402473	1.03863	1.57823
S100A4	0.149321	0.060191	2.48078	0.0131094	1.16105	0.0698845	2.30445	0.0211972	1.03185	1.30642
PSORS1C1	0.223203	0.0928576	2.40371	0.0162294	1.25007	0.116079	2.15435	0.0312128	1.04207	1.4996
RP11-452H21.4	-3.39224	1.0793	-3.143	0.00167226	0.0336333	0.0363004	-26.6214	0	0.00405572	0.278914
CTSS	0.194848	0.0914948	2.1296	0.0332044	1.21513	0.111178	1.93497	0.0529937	1.01564	1.45379
MDFI	0.338424	0.113966	2.96952	0.00298267	1.40273	0.159864	2.51924	0.011761	1.12193	1.75381
GTSE1	0.375132	0.118744	3.15916	0.00158227	1.45518	0.172795	2.63424	0.00843254	1.15303	1.83651
MUC5B	0.0997914	0.0388268	2.57017	0.010165	1.10494	0.0429013	2.44609	0.0144416	1.02398	1.19231
NEIL3	0.807639	0.219668	3.67664	0.000236326	2.24261	0.492629	2.5224	0.0116556	1.45805	3.44933
RND3	0.381522	0.140451	2.7164	0.00659967	1.46451	0.205693	2.25828	0.0239282	1.11209	1.92861
C8orf31	0.302078	0.0934389	3.23289	0.00122543	1.35267	0.126392	2.79027	0.00526642	1.1263	1.62452
COL6A3	0.208884	0.0744674	2.80504	0.00503098	1.2323	0.0917664	2.53145	0.011359	1.06495	1.42595
SEMA6D	-0.258462	0.115262	-2.24238	0.0249367	0.772239	0.0890098	-2.55883	0.0105024	0.616085	0.967972
CTD-2587M2.1	-1.34218	0.428325	-3.13355	0.00172706	0.261276	0.111911	-6.60099	4.08417e-11	0.112852	0.60491
IGFL2	0.144293	0.0654723	2.20388	0.0275329	1.15522	0.075635	2.05226	0.0401448	1.0161	1.3134
DUX4L26	-2.37826	1.14877	-2.07027	0.0384268	0.0927119	0.106504	-8.5188	0	0.00975673	0.880981
CH17-360D5.3	0.370213	0.117126	3.16081	0.00157329	1.44804	0.169603	2.64171	0.00824881	1.15102	1.82171
PLD4	-0.238308	0.103195	-2.30929	0.0209273	0.78796	0.0813138	-2.60768	0.00911578	0.643671	0.964593
CTD-3080P12.3	-1.16607	0.443629	-2.62849	0.00857642	0.311588	0.138229	-4.98022	6.35105e-07	0.130606	0.743357
BMP4	0.175119	0.0761909	2.29843	0.0215373	1.19139	0.090773	2.10843	0.0349938	1.02612	1.38327
FOXQ1	0.219274	0.0779958	2.81136	0.00493325	1.24517	0.0971182	2.52448	0.0115871	1.06866	1.45084
HIST1H2BJ	0.411117	0.158082	2.60065	0.00930466	1.5085	0.238468	2.13237	0.0329761	1.10659	2.05639
LINC00346	0.32199	0.119188	2.70154	0.00690195	1.37987	0.164464	2.30976	0.0209016	1.09241	1.74298
P4HA3	0.204982	0.0924126	2.21812	0.0265464	1.2275	0.113437	2.00555	0.0449039	1.02414	1.47124
MSLN	0.179827	0.0472553	3.80544	0.000141551	1.19701	0.0565651	3.4829	0.00049601	1.09112	1.31317
PYY2	-1.8701	0.594906	-3.14352	0.0016693	0.154109	0.0916802	-9.22655	0	0.0480222	0.494552
U73166.2	-0.647782	0.326759	-1.98245	0.0474292	0.523205	0.170962	-2.7889	0.00528875	0.275762	0.99268
GS1-44D20.1	1.03964	0.286673	3.62658	0.000287203	2.82821	0.810772	2.2549	0.0241398	1.61248	4.96053
DEPDC1B	0.43511	0.112718	3.86016	0.000113314	1.54513	0.174165	3.12999	0.00174814	1.23885	1.92713
GJB2	0.247992	0.0701065	3.53736	0.000404144	1.28145	0.0898379	3.13286	0.00173111	1.11693	1.4702
RP11-15E1.5	-2.01666	0.838408	-2.40534	0.0161573	0.1331	0.111592	-7.7685	7.99361e-15	0.0257349	0.688384
CTA-384D8.35	0.571601	0.131404	4.34995	1.36167e-05	1.7711	0.23273	3.31329	0.000922059	1.36896	2.29137
DMBX1	0.31179	0.0950835	3.27912	0.00104131	1.36587	0.129872	2.81715	0.00484512	1.13364	1.64567
CTD-3214H19.6	-1.24272	0.461008	-2.69566	0.00702503	0.288598	0.133046	-5.34703	8.94102e-08	0.116918	0.712369
NAGS	0.25502	0.111835	2.28033	0.0225881	1.29049	0.144321	2.01278	0.0441374	1.03648	1.60675
LINC01252	-0.978107	0.282728	-3.45954	0.000541106	0.376022	0.106312	-5.86931	4.37613e-09	0.216051	0.654443
FAM111B	0.698807	0.148471	4.70668	2.51781e-06	2.01135	0.298628	3.38666	0.000707483	1.50352	2.69071
ADGRF4	0.344487	0.10035	3.43284	0.000597292	1.41127	0.141621	2.90399	0.00368444	1.15929	1.71802
TGIF2-C20orf24	0.296326	0.135847	2.18132	0.02916	1.34491	0.182702	1.88782	0.0590504	1.03053	1.7552
MTND4P12	-0.10028	0.0425429	-2.35714	0.0184162	0.904584	0.0384836	-2.47938	0.0131611	0.832217	0.983245
MMP14	0.297309	0.095675	3.10749	0.00188683	1.34623	0.128801	2.68812	0.0071856	1.11604	1.6239
CTD-2017D11.2	-0.746094	0.358031	-2.08388	0.0371708	0.474215	0.169784	-3.09679	0.00195626	0.235082	0.956603
LEMD1	0.219792	0.0710387	3.09398	0.0019749	1.24582	0.0885013	2.77756	0.0054768	1.08389	1.43193
RRM2	0.422089	0.108264	3.8987	9.6712e-05	1.52514	0.165118	3.18041	0.00147067	1.23355	1.88567
TMEM154	0.250673	0.0922974	2.71593	0.00660907	1.28489	0.118592	2.40227	0.0162938	1.07227	1.53968
PTPRR	0.314351	0.080444	3.9077	9.31787e-05	1.36937	0.110158	3.35311	0.000799096	1.16963	1.60323
MYL2	0.733398	0.234409	3.12871	0.00175578	2.08214	0.488074	2.21717	0.0266114	1.31517	3.2964
CD109	0.297876	0.0966959	3.08055	0.0020662	1.347	0.130249	2.66409	0.00771962	1.11444	1.62807
GLS2	-0.297988	0.104018	-2.86476	0.00417319	0.74231	0.0772139	-3.33735	0.000845809	0.605403	0.910177
FERMT1	0.370169	0.0955914	3.8724	0.000107767	1.44798	0.138414	3.23651	0.00121003	1.20059	1.74634
ECHDC2	-0.360956	0.125295	-2.88085	0.00396601	0.69701	0.0873317	-3.46942	0.000521587	0.54524	0.891025
ADAM12	0.138104	0.0613692	2.25037	0.0244252	1.14809	0.0704577	2.10189	0.0355625	1.01798	1.29484
CSTA	0.153889	0.0764518	2.01289	0.0441267	1.16636	0.0891704	1.86565	0.0620899	1.00405	1.35491
AC009065.4	-0.634488	0.237408	-2.67256	0.00752755	0.530207	0.125876	-3.7322	0.000189815	0.332938	0.84436
RP1-34M23.5	0.64413	0.180057	3.57737	0.000347072	1.90433	0.342888	2.63739	0.00835462	1.33807	2.71023
HNRNPA1P33	0.359007	0.101877	3.52391	0.000425221	1.43191	0.145879	2.96072	0.00306918	1.17273	1.74837
PABPC1L	-0.194964	0.0858192	-2.27179	0.0230991	0.822865	0.0706176	-2.50837	0.0121289	0.695471	0.973594
MEG9	-0.790552	0.227711	-3.47174	0.000517093	0.453594	0.103288	-5.29011	1.22243e-07	0.290295	0.708753
RP11-958N24.1	-0.189795	0.0745296	-2.54657	0.0108787	0.827129	0.0616456	-2.80428	0.00504296	0.714716	0.957222
COCH	-0.267827	0.11985	-2.23468	0.0254382	0.76504	0.0916902	-2.56254	0.0103909	0.604878	0.967611
HSF4	-0.179821	0.0829228	-2.16854	0.0301177	0.835419	0.0692753	-2.37575	0.0175135	0.710102	0.982853
CKLF	0.571219	0.166044	3.44017	0.000581342	1.77042	0.293968	2.62078	0.00877296	1.27862	2.4514
LINC00941	0.391995	0.0973013	4.02867	5.60932e-05	1.47993	0.143999	3.33287	0.000859557	1.22298	1.79087
ELF4	0.354999	0.163228	2.17486	0.0296403	1.42618	0.232793	1.83072	0.0671417	1.0357	1.96388
PKM	0.339687	0.154677	2.19611	0.0280842	1.40451	0.217245	1.86199	0.0626044	1.0372	1.90189
IGFBP3	0.223221	0.0854603	2.61198	0.00900194	1.2501	0.106834	2.34099	0.0192327	1.0573	1.47804
NPY4R	0.244472	0.123397	1.98118	0.047571	1.27695	0.157571	1.75759	0.0788165	1.00262	1.62633
SLC25A45	-0.50064	0.168267	-2.97528	0.0029272	0.606142	0.101994	-3.8616	0.000112649	0.435859	0.842953
CENPK	0.436827	0.141645	3.08395	0.00204271	1.54779	0.219237	2.49861	0.012468	1.17258	2.04306
ITGA3	0.355615	0.096942	3.66833	0.000244138	1.42706	0.138342	3.08698	0.00202202	1.18012	1.72567
S100A2	0.149655	0.0417679	3.583	0.000339665	1.16143	0.0485107	3.32779	0.00087539	1.07014	1.26051
TK1	0.315755	0.0939053	3.36248	0.000772444	1.37129	0.128772	2.88335	0.00393468	1.14077	1.6484
CTD-2666L21.2	-2.99854	1.21911	-2.45962	0.0139083	0.0498597	0.0607843	-15.6314	0	0.00457135	0.54382
MUC5AC	0.0907392	0.0318285	2.85088	0.00435986	1.09498	0.0348517	2.72536	0.00642314	1.02876	1.16547
LDLRAD1	-0.369892	0.149442	-2.47515	0.013318	0.690809	0.103236	-2.99499	0.00274451	0.515409	0.925898
INPP5J	-0.438557	0.149023	-2.94287	0.00325184	0.644967	0.0961151	-3.69383	0.000220898	0.481602	0.863746
RP11-44F14.7	-1.81578	0.88204	-2.05862	0.039531	0.16271	0.143517	-5.83407	5.40913e-09	0.0288816	0.916663
LINC00704	0.48056	0.151345	3.17527	0.00149698	1.61698	0.244721	2.52115	0.0116971	1.20193	2.17535
RP13-20L14.1	-6.09052	2.18225	-2.79094	0.00525548	0.00226423	0.0049411	-201.926	0	3.14333e-05	0.163099
MGLL	0.388807	0.114382	3.3992	0.000675838	1.47522	0.168739	2.81631	0.00485791	1.17895	1.84595
PTGIS	0.123873	0.0607901	2.03772	0.0415779	1.13187	0.0688067	1.91656	0.0552933	1.00474	1.27509
RP11-304L19.3	0.3365	0.12471	2.69826	0.00697024	1.40004	0.174599	2.29119	0.0219524	1.09645	1.7877
SYT12	0.223246	0.0699703	3.19058	0.00141985	1.25013	0.0874719	2.85953	0.00424271	1.08992	1.43388
ATHL1	0.135377	0.0671318	2.01659	0.043738	1.14497	0.0768638	1.88605	0.0592884	1.00381	1.30598
CD300LG	-0.46186	0.215355	-2.14464	0.0319814	0.630111	0.135698	-2.72584	0.00641386	0.413148	0.961009
C10orf62	-4.15145	2.05937	-2.01588	0.0438124	0.0157416	0.0324177	-30.3617	0	0.000278039	0.891228
SERPINB4	0.160569	0.0758797	2.1161	0.0343365	1.17418	0.0890963	1.95495	0.0505892	1.01192	1.36246
RARRES3	0.40189	0.0911314	4.41001	1.03368e-05	1.49465	0.136209	3.63152	0.000281755	1.25017	1.78694
RAB26	-0.216595	0.0839765	-2.57923	0.00990194	0.805256	0.0676226	-2.87987	0.00397842	0.683051	0.949325
ASPM	0.489606	0.117878	4.1535	3.27432e-05	1.63167	0.192338	3.28418	0.00102281	1.29508	2.05575
SERPINB5	0.306859	0.0672713	4.56152	5.07852e-06	1.35915	0.0914318	3.92806	8.56333e-05	1.19126	1.5507
ETV7	0.317262	0.132971	2.38595	0.017035	1.37336	0.182617	2.04451	0.0409034	1.05828	1.78226
CDC20	0.359616	0.0932773	3.85534	0.000115567	1.43278	0.133646	3.23826	0.00120263	1.19339	1.72019
RP11-93K22.13	1.18291	0.418865	2.82409	0.00474146	3.26387	1.36712	1.65594	0.0977338	1.43613	7.41773
GSTM2	-0.285937	0.10113	-2.82743	0.00469239	0.75131	0.0759799	-3.27311	0.00106372	0.616222	0.916012
FTOP1	-3.22728	1.19187	-2.70774	0.00677427	0.0396652	0.0472759	-20.3134	0	0.00383608	0.410141
RP11-33B1.4	-0.636587	0.256583	-2.48101	0.0131009	0.529095	0.135757	-3.46873	0.000522918	0.319985	0.874859
PSCA	0.144504	0.036627	3.94529	7.97048e-05	1.15547	0.0423213	3.67348	0.00023927	1.07543	1.24146
DTNA	-0.382793	0.104556	-3.66112	0.000251117	0.681954	0.0713026	-4.46051	8.17648e-06	0.555593	0.837054
CTB-31O20.3	-0.267885	0.133275	-2.01002	0.0444294	0.764996	0.101955	-2.30498	0.0211674	0.589135	0.993351
FGF12-AS2	-7.49102	3.11286	-2.40648	0.0161072	0.000558071	0.0017372	-575.319	0	1.25032e-06	0.249091
CGB7	0.252351	0.0939221	2.68681	0.00721378	1.28705	0.120882	2.37461	0.0175677	1.07065	1.54718
KIF4A	0.478151	0.123573	3.86939	0.000109109	1.61309	0.199334	3.07569	0.00210016	1.26611	2.05515
ANLN	0.447016	0.0953782	4.68678	2.77542e-06	1.56364	0.149137	3.77934	0.000157245	1.29703	1.88505
PLAUR	0.304698	0.0992128	3.07115	0.00213233	1.35621	0.134554	2.64738	0.00811186	1.11655	1.64732
IGF2BP3	0.205105	0.0617326	3.32247	0.000892253	1.22765	0.0757863	3.00389	0.00266554	1.08775	1.38555
CARD16	0.311507	0.148633	2.09582	0.0360986	1.36548	0.202955	1.8008	0.0717349	1.0204	1.82727
RP11-713N11.6	-1.49524	0.554468	-2.6967	0.00700294	0.224196	0.124309	-6.24092	4.35008e-10	0.0756247	0.664647
PRR11	0.487647	0.131154	3.71814	0.000200696	1.62848	0.213581	2.94258	0.00325485	1.25934	2.10582
C2orf61	0.587635	0.218529	2.68905	0.00716555	1.79973	0.393292	2.03342	0.0420104	1.17272	2.76197
MT-TA	-0.522612	0.23376	-2.23568	0.0253726	0.59297	0.138612	-2.93647	0.00331975	0.375021	0.937581
CTSB	0.353009	0.144462	2.44362	0.0145409	1.42334	0.205619	2.05888	0.0395058	1.07237	1.88919
SDC1	0.250133	0.0867696	2.88273	0.00394247	1.2842	0.111429	2.55047	0.0107579	1.08336	1.52226
CTD-2377D24.6	0.129382	0.0478577	2.70348	0.00686183	1.13812	0.054468	2.53589	0.0112162	1.03622	1.25005
DDTL	-0.529354	0.207081	-2.55627	0.0105802	0.588985	0.121968	-3.36987	0.000752046	0.392497	0.883837
PKD1P1	-0.151512	0.0670269	-2.26046	0.0237927	0.859408	0.0576035	-2.44069	0.0146593	0.753609	0.98006
TCN1	0.118544	0.0465111	2.54873	0.0108116	1.12586	0.0523648	2.40346	0.0162408	1.02776	1.23331
PLEK2	0.348748	0.0892167	3.909	9.26778e-05	1.41729	0.126446	3.30016	0.000966299	1.18992	1.68811
GPR1	0.352188	0.111516	3.15819	0.00158751	1.42218	0.158595	2.66198	0.00776834	1.14296	1.7696
FN1	0.193518	0.070227	2.7556	0.00585839	1.21351	0.0852212	2.50537	0.0122322	1.05747	1.39258
FAM163A	-0.422506	0.141582	-2.98418	0.00284338	0.655402	0.0927931	-3.71361	0.000204321	0.496585	0.865013
RP11-348N5.7	-1.08345	0.377495	-2.87011	0.00410328	0.338425	0.127754	-5.17851	2.2366e-07	0.161487	0.70923
RP11-161H23.5	0.280168	0.103444	2.7084	0.00676085	1.32335	0.136893	2.36208	0.0181728	1.0805	1.62079
RP11-60L3.1	0.359874	0.132066	2.72496	0.00643085	1.43315	0.18927	2.28853	0.0221068	1.10631	1.85655
WNT2	0.197299	0.0757386	2.605	0.00918756	1.21811	0.0922578	2.36411	0.0180733	1.05007	1.41304
GBP1	0.338636	0.103893	3.25948	0.00111616	1.40303	0.145765	2.76495	0.00569312	1.14455	1.71989
RP11-240L7.4	-4.14284	2.05114	-2.01977	0.0434068	0.0158777	0.0325673	-30.2181	0	0.000285005	0.884547
RP11-455O6.5	-3.09129	0.969698	-3.18789	0.00143314	0.0454433	0.0440662	-21.6619	0	0.006793	0.304003
SYTL2	0.241192	0.096627	2.49612	0.0125561	1.27277	0.122984	2.2179	0.0265613	1.05317	1.53815
ITGBL1	0.15271	0.0699087	2.18442	0.0289317	1.16499	0.0814427	2.0258	0.0427852	1.01581	1.33606
RP11-61I13.3	-0.72436	0.345668	-2.09553	0.0361237	0.484635	0.167523	-3.07638	0.00209527	0.246139	0.954219
FSCN1	0.228524	0.0975843	2.34181	0.0191907	1.25674	0.122638	2.0935	0.0363048	1.03796	1.52163
FGF17	-1.16639	0.313499	-3.72056	0.000198784	0.31149	0.0976516	-7.05068	1.78046e-12	0.168497	0.57583
LPAR5	0.315843	0.108239	2.91801	0.00352272	1.37141	0.148441	2.50211	0.0123456	1.10927	1.69552
RUNX2	0.281149	0.107463	2.61625	0.00889021	1.32465	0.142351	2.28064	0.0225695	1.07307	1.63521
CD68	0.265763	0.105205	2.52615	0.011532	1.30443	0.137232	2.21833	0.026532	1.06138	1.60313
PTGES	0.276541	0.0691525	3.999	6.36103e-05	1.31856	0.0911819	3.49369	0.000476394	1.15143	1.50995
MKI67	0.405777	0.102436	3.96128	7.45483e-05	1.50047	0.153701	3.2561	0.00112953	1.22753	1.83409
RP3-332B22.1	-4.32267	2.13645	-2.0233	0.0430425	0.0132644	0.0283388	-34.8193	0	0.000201438	0.873446
KLB	-0.267488	0.133225	-2.00779	0.0446658	0.7653	0.101957	-2.30195	0.0213379	0.589427	0.993649
ABLIM3	0.368715	0.112671	3.27249	0.00106605	1.44588	0.162908	2.73697	0.0062008	1.15938	1.80317
GPX8	0.340247	0.123802	2.74832	0.00599021	1.40529	0.173978	2.32957	0.0198288	1.10252	1.79121
SRPX2	0.254053	0.0936515	2.71275	0.00667274	1.28924	0.120739	2.39558	0.0165942	1.07304	1.549
CDC25C	0.465234	0.147449	3.15522	0.00160376	1.59239	0.234795	2.52299	0.0116362	1.19272	2.12597
MAD2L1	0.348368	0.132225	2.63466	0.00842219	1.41675	0.18733	2.2247	0.0261015	1.09331	1.83588
RPL29P11	1.22238	0.514248	2.37702	0.0174529	3.39526	1.74601	1.37185	0.17011	1.23921	9.30255
LINC00494	-0.464325	0.156425	-2.96836	0.00299392	0.62856	0.0983221	-3.77779	0.000158225	0.462591	0.854073
GUSBP11	-0.291915	0.117177	-2.49122	0.0127305	0.746832	0.0875118	-2.89295	0.00381636	0.593583	0.939647
HIST1H4H	0.567182	0.176376	3.21575	0.00130103	1.76329	0.311003	2.45429	0.0141162	1.24794	2.49147
RP11-416N2.4	-0.462741	0.149912	-3.08675	0.00202359	0.629556	0.094378	-3.92511	8.669e-05	0.469277	0.844578
RP1-163M9.8	0.934915	0.472335	1.97935	0.0477768	2.547	1.20303	1.28591	0.198474	1.0092	6.42807
YWHAZP6	2.30458	0.723206	3.18662	0.00143948	10.02	7.24651	1.24473	0.21323	2.42813	41.3486
DAPP1	0.312509	0.0993321	3.1461	0.00165465	1.36685	0.135772	2.70195	0.00689337	1.12504	1.66063
ITGA2	0.369432	0.100217	3.68633	0.00022751	1.44691	0.145005	3.08205	0.00205578	1.18888	1.76095
KRT16	0.18575	0.0453547	4.09549	4.21273e-05	1.20412	0.0546126	3.73762	0.00018577	1.1017	1.31606
RP11-347C12.3	0.296715	0.113567	2.61268	0.00898354	1.34543	0.152797	2.26072	0.0237764	1.07694	1.68086
HJURP	0.495491	0.121936	4.06353	4.83361e-05	1.6413	0.200134	3.20437	0.00135359	1.2924	2.0844
PPARG	0.239413	0.0774731	3.09027	0.00199975	1.2705	0.0984297	2.74818	0.00599269	1.09152	1.47884
ADAM28	0.209482	0.0710293	2.94924	0.00318557	1.23304	0.0875819	2.66082	0.00779509	1.0728	1.41722
STYK1	0.320571	0.100975	3.17475	0.00149967	1.37791	0.139135	2.71616	0.00660432	1.1305	1.67947
ANKFN1	0.271374	0.113907	2.38242	0.0171994	1.31177	0.149419	2.08652	0.0369319	1.0493	1.63989
ITGB3	0.255876	0.105468	2.42611	0.0152618	1.29159	0.136222	2.14058	0.0323081	1.05039	1.58818
SPRR2F	3.99292	1.87409	2.13059	0.0331233	54.2127	101.6	0.523749	0.600453	1.3768	2134.68
S100P	0.176819	0.0494561	3.57527	0.000349862	1.19342	0.0590216	3.27702	0.00104909	1.08316	1.31489
CCAT1	0.326463	0.0938102	3.48004	0.000501347	1.38606	0.130026	2.96907	0.00298705	1.15327	1.66584
LY6E	0.289348	0.0816996	3.5416	0.000397701	1.33556	0.109114	3.07527	0.00210313	1.13794	1.56749
SLC13A5	0.103733	0.0503139	2.06172	0.039234	1.1093	0.0558134	1.95839	0.0501839	1.00513	1.22427
LOXL2	0.235538	0.0813064	2.89692	0.0037685	1.26559	0.102901	2.58103	0.00985061	1.07916	1.48423
ZNF37BP	-0.49402	0.139808	-3.53357	0.000409987	0.610169	0.0853062	-4.56979	4.88214e-06	0.463922	0.802517
CCL3L3	-0.32023	0.143872	-2.22579	0.0260279	0.725982	0.104449	-2.62347	0.00870389	0.547598	0.962476
FHL2	0.236421	0.100249	2.35834	0.0183567	1.26671	0.126986	2.10029	0.035703	1.04075	1.54173
CKS2	0.446316	0.122797	3.63459	0.000278424	1.56255	0.191876	2.93182	0.00336979	1.22831	1.98773
DUOXA2	0.0941192	0.0442062	2.1291	0.0332464	1.09869	0.048569	2.03197	0.0421565	1.0075	1.19813
LGALS9	0.364788	0.123855	2.94528	0.00322666	1.44021	0.178378	2.46785	0.0135928	1.1298	1.83591
KIF2C	0.395994	0.108561	3.64766	0.000264638	1.48586	0.161307	3.01203	0.00259506	1.20108	1.83817
CTBP1-AS	-0.564641	0.166798	-3.38519	0.000711298	0.568564	0.0948351	-4.54932	5.38186e-06	0.410016	0.788421
KYNU	0.433123	0.110631	3.91501	9.03993e-05	1.54207	0.170601	3.17739	0.00148605	1.24146	1.91546
KLHL30	0.298463	0.117082	2.54918	0.0107977	1.34779	0.157802	2.20394	0.0275283	1.07142	1.69544
ADAM1A	-0.934868	0.355028	-2.63322	0.00845784	0.392638	0.139397	-4.35706	1.31821e-05	0.19579	0.787394
ANXA2	0.519531	0.130594	3.9782	6.94376e-05	1.68124	0.21956	3.10274	0.00191736	1.30157	2.17166
HK2	0.238987	0.0768115	3.11135	0.00186235	1.26996	0.0975477	2.76749	0.00564896	1.09247	1.47629
TFAP2A	0.244672	0.0831314	2.9432	0.0032484	1.2772	0.106176	2.61079	0.00903325	1.08517	1.50322
PABPN1L	-9.80748	3.91414	-2.50565	0.0122225	5.50385e-05	0.000215428	-4641.66	0	2.56417e-08	0.118137
ADGRF1	0.209784	0.0655519	3.20027	0.00137299	1.23341	0.0808525	2.88688	0.00389082	1.0847	1.40251
ZBED2	0.26851	0.0732612	3.66511	0.000247235	1.30801	0.0958267	3.21428	0.0013077	1.13306	1.50998
LCN10	-0.292852	0.134218	-2.18191	0.0291163	0.746132	0.100145	-2.53501	0.0112444	0.573547	0.97065
LAMB3	0.29421	0.0772754	3.80729	0.000140495	1.34207	0.103709	3.29833	0.000972601	1.15345	1.56153
KLHDC7B	0.216902	0.0608992	3.56166	0.000368521	1.24222	0.0756503	3.20187	0.00136539	1.10246	1.39971
RP4-765H13.1	3.11006	1.20847	2.57356	0.010066	22.4225	27.0969	0.790588	0.429184	2.0991	239.516
UBAP1L	-0.5077	0.148155	-3.42682	0.000610688	0.601878	0.0891712	-4.46469	8.01832e-06	0.450193	0.804671
NINJ2	0.276487	0.124505	2.22069	0.0263722	1.31849	0.164159	1.94013	0.0523635	1.03299	1.68289
TRHDE	0.22331	0.0971297	2.29909	0.0214999	1.25021	0.121432	2.06047	0.0393535	1.03349	1.51237
MOGAT3	0.214904	0.0939409	2.28765	0.0221579	1.23974	0.116463	2.05854	0.0395384	1.03126	1.49037
CA9	0.106943	0.0430559	2.48382	0.0129982	1.11287	0.0479157	2.35562	0.018492	1.02281	1.21086
TNFAIP6	0.229108	0.0922385	2.48386	0.0129967	1.25748	0.115988	2.21987	0.0264279	1.04951	1.50665
C1orf132	-0.387101	0.107195	-3.61118	0.000304809	0.679023	0.0727879	-4.40976	1.03485e-05	0.550351	0.837778
RP11-554I8.2	0.39011	0.124989	3.12116	0.0018014	1.47714	0.184626	2.58437	0.00975561	1.1562	1.88718
PCDH7	0.183563	0.07894	2.32535	0.0200532	1.20149	0.0948457	2.12441	0.0336361	1.02926	1.40254
CASC5	0.587488	0.138867	4.23057	2.331e-05	1.79946	0.249887	3.1993	0.00137761	1.37069	2.36237
CCNA2	0.540972	0.138606	3.90296	9.50235e-05	1.71768	0.23808	3.01444	0.00257456	1.30906	2.25384
UHRF1	0.517653	0.121314	4.26704	1.98083e-05	1.67808	0.203576	3.33087	0.000865742	1.32297	2.12852
PRSS3	0.138094	0.0522437	2.64326	0.00821119	1.14808	0.0599801	2.46887	0.013554	1.03634	1.27187
TRIP13	0.238552	0.113814	2.09597	0.0360847	1.26941	0.144477	1.86472	0.0622205	1.0156	1.58665
SLC38A5	0.162577	0.0626924	2.59325	0.00950734	1.17654	0.0737601	2.39342	0.016692	1.0405	1.33036
SLC22A3	0.228075	0.0855236	2.66681	0.00765745	1.25618	0.107433	2.38455	0.0170998	1.06232	1.48542
AP000349.2	0.161157	0.0559331	2.88125	0.00396102	1.17487	0.0657141	2.66107	0.00778934	1.05288	1.31099
DUSP6	0.285954	0.14125	2.02445	0.0429236	1.33103	0.188008	1.76073	0.0782845	1.00915	1.75558
HMGA2	0.260923	0.0600762	4.3432	1.40424e-05	1.29813	0.0779866	3.8228	0.000131942	1.15393	1.46034
KCP	0.198297	0.0686364	2.8891	0.00386352	1.21932	0.0836901	2.62068	0.00877554	1.06585	1.3949
CDH3	0.324234	0.0776312	4.1766	2.95903e-05	1.38297	0.107362	3.56711	0.000360939	1.18777	1.61025
CTD-2510F5.4	1.67287	0.599145	2.79209	0.00523688	5.32742	3.1919	1.35575	0.175178	1.64636	17.2389
ANKRD24	-0.426179	0.160679	-2.65236	0.00799303	0.653	0.104923	-3.30718	0.000942388	0.476588	0.894711
COX6B2	0.151866	0.0669021	2.26998	0.0232088	1.164	0.0778744	2.10602	0.0352029	1.02096	1.32709
RP11-1398P2.1	0.469272	0.17581	2.66919	0.00760339	1.59883	0.281091	2.13038	0.0331405	1.1328	2.25659
E2F8	0.424321	0.133661	3.1746	0.00150041	1.52855	0.204308	2.58704	0.00968052	1.17627	1.98633
KIF11	0.606351	0.143453	4.22682	2.37014e-05	1.83373	0.263054	3.16942	0.00152745	1.38429	2.42908
COL11A1	0.129396	0.0463492	2.79176	0.00524224	1.13814	0.0527519	2.61868	0.00882699	1.03931	1.24637
DRC1	-0.44355	0.146708	-3.02335	0.00249997	0.641754	0.0941506	-3.80503	0.00014179	0.481383	0.855553
DHFRP1	0.666489	0.173982	3.83079	0.00012773	1.94739	0.33881	2.79622	0.00517042	1.38471	2.73871
FSTL1	0.206612	0.0984122	2.09945	0.0357769	1.22951	0.120998	1.89676	0.0578591	1.01382	1.49107
RP11-583F2.2	-4.11137	1.42843	-2.87824	0.00399898	0.0163853	0.0234052	-42.0254	0	0.000996711	0.269362
SPRR1B	0.210502	0.052665	3.997	6.4149e-05	1.2343	0.0650042	3.60434	0.000312942	1.11325	1.36851
DUSP8P3	-1.49492	0.69467	-2.15198	0.0313986	0.224267	0.155791	-4.97931	6.38122e-07	0.0574726	0.875123
RP11-709D24.8	-6.05132	1.54069	-3.92768	8.57699e-05	0.00235476	0.00362794	-274.989	0	0.000114951	0.048237
SERPINB2	0.191667	0.0683042	2.80608	0.00501489	1.21127	0.0827346	2.55355	0.0106632	1.0595	1.38478
COL5A2	0.20944	0.0783305	2.6738	0.00749965	1.23299	0.0965805	2.41237	0.0158493	1.05751	1.43759
COL3A1	0.177341	0.0703954	2.51921	0.0117619	1.19404	0.0840547	2.30847	0.0209731	1.04015	1.37069
RP11-400N13.3	0.591314	0.145015	4.07761	4.55001e-05	1.80636	0.261949	3.07831	0.00208176	1.35946	2.40017
CEACAM6	0.168645	0.0530797	3.1772	0.00148705	1.1837	0.0628305	2.92374	0.00345858	1.06674	1.31348
ISG15	0.174354	0.0698039	2.49776	0.0124979	1.19048	0.0830999	2.29214	0.0218976	1.03825	1.36502
EXO1	0.523897	0.148253	3.53379	0.000409639	1.6886	0.25034	2.75064	0.00594789	1.26279	2.25798
CACNA2D3	-0.369974	0.138412	-2.67299	0.00751783	0.690753	0.0956083	-3.23452	0.00121846	0.526631	0.906022
C16orf74	0.235341	0.0789906	2.97935	0.0028886	1.26534	0.09995	2.65473	0.00793726	1.08385	1.47722
PWAR1	-3.2828	1.57522	-2.08402	0.037158	0.0375232	0.0591073	-16.2836	0	0.00171187	0.822488
DUSP8P5	-0.877737	0.289099	-3.03611	0.00239652	0.415723	0.120185	-4.86148	1.16511e-06	0.235897	0.732631
SLAMF9	0.354384	0.158528	2.23546	0.0253872	1.4253	0.225951	1.88228	0.0597984	1.04464	1.94467
CTD-2171N6.1	0.220644	0.108465	2.03424	0.041927	1.24688	0.135242	1.82546	0.0679322	1.00809	1.54223
COL12A1	0.204385	0.0709214	2.88186	0.00395337	1.22677	0.0870043	2.60643	0.00914907	1.06757	1.40972
RP11-395I6.3	-1.15196	0.271989	-4.23533	2.28216e-05	0.316016	0.0859528	-7.95767	1.77636e-15	0.185435	0.53855
KCNN4	0.257324	0.0692561	3.71554	0.000202769	1.29346	0.0895803	3.27599	0.00105292	1.12928	1.48151
RP11-49K24.3	-3.70343	1.14666	-3.22976	0.00123894	0.0246388	0.0282523	-34.5233	0	0.00260364	0.233161
RP3-340N1.2	0.140133	0.0702092	1.99594	0.0459406	1.15043	0.0807706	1.8624	0.0625467	1.00253	1.32014
SEC14L2	0.260771	0.109056	2.39117	0.0167948	1.29793	0.141547	2.10482	0.0353071	1.04815	1.60724
HAPLN3	0.377801	0.111191	3.39776	0.000679406	1.45907	0.162236	2.82966	0.00465979	1.17336	1.81436
SDK2	-0.296878	0.107073	-2.77267	0.00555979	0.743135	0.0795694	-3.22819	0.00124578	0.602459	0.91666
DPY19L2P3	-1.60718	0.493513	-3.25662	0.00112748	0.200452	0.0989254	-8.08234	6.66134e-16	0.0761957	0.527337
UCA1	0.233358	0.0497019	4.69515	2.66417e-06	1.26283	0.0627652	4.18756	2.8197e-05	1.14562	1.39204
PADI3	0.190089	0.0797576	2.38333	0.0171567	1.20936	0.0964553	2.17051	0.0299685	1.03434	1.41398
S100A14	0.203257	0.0582944	3.48674	0.00048895	1.22539	0.0714332	3.15522	0.00160376	1.09308	1.37371
OAS3	0.371825	0.100285	3.70768	0.000209166	1.45038	0.145452	3.09642	0.0019587	1.19157	1.76541
GIMAP2	0.250481	0.120308	2.082	0.0373421	1.28464	0.154552	1.84173	0.0655152	1.01479	1.62625
OAS2	0.320644	0.0865939	3.70285	0.000213192	1.37802	0.119328	3.16787	0.00153558	1.16291	1.63291
CAPN8	0.129707	0.0547187	2.37044	0.0177668	1.1385	0.062297	2.22315	0.0262059	1.02271	1.26738
NMU	0.18376	0.07132	2.57656	0.00997893	1.20173	0.0857072	2.35368	0.0185885	1.04496	1.38202
MYOF	0.566019	0.134715	4.20159	2.65044e-05	1.76124	0.237266	3.20838	0.00133483	1.35254	2.29345
TSPAN15	0.301824	0.109359	2.75994	0.00578125	1.35232	0.147889	2.38235	0.0172024	1.09143	1.67559
KCNK3	-0.174012	0.0609622	-2.85442	0.00431154	0.840287	0.0512257	-3.11783	0.0018219	0.745653	0.946932
SMCO2	0.651307	0.221614	2.93893	0.00329349	1.91805	0.425065	2.15978	0.03079	1.24228	2.9614
CTD-3064M3.7	-0.643997	0.25673	-2.50847	0.0121257	0.525189	0.134832	-3.52151	0.00042909	0.317532	0.868649
HBEGF	0.279418	0.10178	2.74532	0.00604519	1.32236	0.13459	2.39514	0.0166142	1.08321	1.6143
C2orf27B	1.87398	0.842821	2.22346	0.0261847	6.51417	5.49028	1.00435	0.315209	1.24867	33.9836
PABPC4	0.451158	0.208859	2.16011	0.0307642	1.57013	0.327936	1.73854	0.0821155	1.04269	2.36438
RP11-177H2.1	-1.0201	0.331298	-3.0791	0.00207628	0.36056	0.119453	-5.35309	8.64642e-08	0.188354	0.690205
TNFSF11	0.211715	0.0942291	2.24681	0.0246522	1.2358	0.116448	2.0249	0.0428776	1.0274	1.48646
DTL	0.493163	0.138857	3.5516	0.000382899	1.63749	0.227376	2.80367	0.00505245	1.24733	2.14968
KCNK1	0.301377	0.099251	3.03651	0.00239333	1.35172	0.134159	2.62165	0.0087506	1.11277	1.64198
IFI27	0.246316	0.0709693	3.47074	0.000519022	1.2793	0.0907913	3.07633	0.00209566	1.11318	1.47022
RP4-539M6.19	0.305211	0.120058	2.5422	0.0110158	1.35691	0.162908	2.19088	0.0284607	1.0724	1.7169
RP4-800G7.2	-0.407135	0.140926	-2.88899	0.00386484	0.665554	0.0937942	-3.56574	0.000362835	0.504925	0.877284
RP11-1008C21.1	0.446694	0.215284	2.07491	0.0379953	1.56314	0.336518	1.67342	0.0942448	1.02505	2.38367
RP5-884M6.1	0.341312	0.101191	3.37293	0.000743715	1.40679	0.142355	2.85758	0.00426879	1.15371	1.71539
UBE2C	0.315278	0.0896139	3.51818	0.000434521	1.37064	0.122828	3.01754	0.00254834	1.14986	1.63382
CDCA5	0.510245	0.119793	4.25938	2.04994e-05	1.6657	0.19954	3.33618	0.000849389	1.31713	2.10652
HIST1H2BC	0.305239	0.108981	2.80084	0.00509696	1.35695	0.147882	2.41374	0.0157895	1.09597	1.68007
GRIK4	-1.02573	0.458099	-2.2391	0.0251496	0.358535	0.164245	-3.90554	9.40139e-05	0.146082	0.879967
HSD17B3	-0.777635	0.264158	-2.94383	0.00324178	0.459491	0.121378	-4.4531	8.46408e-06	0.273795	0.771132
HCN1	-0.791661	0.329335	-2.40382	0.0162249	0.453092	0.149219	-3.66514	0.000247201	0.237605	0.864005
RP4-583P15.14	0.220589	0.0964643	2.28674	0.0222112	1.24681	0.120273	2.05209	0.040161	1.03202	1.5063
RP11-326C3.2	0.18398	0.0693082	2.65452	0.00794211	1.20199	0.0833079	2.42464	0.0153235	1.04932	1.37688
CTSE	0.138433	0.0473513	2.92353	0.00346083	1.14847	0.0543817	2.7302	0.0063296	1.04668	1.26016
MX1	0.165714	0.0793815	2.08756	0.0368374	1.18024	0.0936888	1.92376	0.0543842	1.01018	1.37892
IL22RA1	0.263578	0.0813378	3.24054	0.00119304	1.30158	0.105868	2.84865	0.00439058	1.10978	1.52653
MME	0.139614	0.0660211	2.11469	0.0344568	1.14983	0.075913	1.9737	0.0484156	1.01027	1.30867
KLK6	0.133159	0.0438745	3.035	0.00240533	1.14243	0.0501236	2.84161	0.0044886	1.0483	1.24502
CASC8	0.565342	0.133866	4.2232	2.4086e-05	1.76005	0.235611	3.22587	0.00125589	1.35387	2.28808
KLF5	0.344792	0.090647	3.80367	0.000142567	1.4117	0.127966	3.21723	0.00129437	1.1819	1.68616
MFAP5	0.159963	0.061921	2.58334	0.00978497	1.17347	0.0726623	2.38731	0.0169723	1.03935	1.32489
GINS1	0.46151	0.133691	3.45207	0.000556304	1.58647	0.212096	2.7651	0.00569048	1.22077	2.06172
MALL	0.234879	0.0748725	3.13706	0.00170653	1.26476	0.0946955	2.79587	0.00517603	1.09213	1.46467
MXRA5	0.222934	0.0752218	2.96369	0.00303979	1.24974	0.0940076	2.65657	0.00789396	1.07843	1.44826
CD55	0.180673	0.0847104	2.13283	0.0329385	1.19802	0.101485	1.95126	0.0510265	1.01475	1.4144
IZUMO4	-0.527878	0.156817	-3.36621	0.000762099	0.589855	0.0924993	-4.43403	9.24876e-06	0.433773	0.8021
DBH-AS1	-0.390289	0.173776	-2.24593	0.0247083	0.676861	0.117622	-2.74726	0.00600952	0.481483	0.95152
C9orf173	-1.7288	0.616238	-2.80542	0.00502515	0.177497	0.10938	-7.51968	5.4956e-14	0.0530454	0.593926
S100A10	0.379349	0.10984	3.45364	0.00055307	1.46133	0.160513	2.87411	0.00405165	1.17829	1.81236
MELK	0.38538	0.104877	3.67459	0.000238232	1.47017	0.154187	3.04936	0.00229328	1.19701	1.80567
LINC01426	0.371791	0.13797	2.69472	0.0070448	1.45033	0.200102	2.2505	0.0244174	1.10669	1.90067
C19orf33	0.241673	0.0660663	3.65804	0.000254148	1.27338	0.0841274	3.24957	0.00115578	1.11872	1.44942
LUM	0.18394	0.0792416	2.32125	0.0202733	1.20194	0.0952439	2.12027	0.0339829	1.02904	1.40389
RP11-204C16.4	0.490068	0.247638	1.97897	0.0478194	1.63243	0.404251	1.56444	0.117714	1.00472	2.65231
CFAP70	-0.465166	0.128697	-3.61442	0.000301019	0.628031	0.0808258	-4.60211	4.18235e-06	0.488016	0.808217
IQGAP3	0.262132	0.0847188	3.09414	0.00197387	1.2997	0.110109	2.72183	0.00649216	1.10085	1.53446
KIF26A	-0.282744	0.124256	-2.2755	0.0228762	0.753712	0.0936535	-2.62978	0.00854411	0.590797	0.961552
LIPH	0.420824	0.101986	4.1263	3.68652e-05	1.52322	0.155346	3.36806	0.000756996	1.24724	1.86025
FOXM1	0.304197	0.0830103	3.66457	0.00024775	1.35554	0.112523	3.15967	0.0015795	1.152	1.59503
EREG	0.235161	0.0583113	4.03284	5.51059e-05	1.26511	0.0737704	3.59374	0.00032596	1.12848	1.41829
IL13RA2	-0.331737	0.135204	-2.45359	0.0141436	0.717676	0.097033	-2.90956	0.00361933	0.550608	0.935438
AP000695.4	0.796288	0.207979	3.82869	0.000128829	2.21729	0.461151	2.63969	0.00829831	1.475	3.33316
BRSK2	-0.213214	0.0968214	-2.20213	0.027656	0.807984	0.0782301	-2.45451	0.0141077	0.668325	0.976826
LAMA3	0.379126	0.0829015	4.57321	4.80311e-06	1.46101	0.12112	3.80621	0.000141112	1.2419	1.71877
UCP2	-0.24877	0.115974	-2.14505	0.0319488	0.779759	0.0904319	-2.43544	0.0148739	0.621217	0.978763
RP11-182J1.14	-2.52685	1.16535	-2.16833	0.0301338	0.07991	0.0931229	-9.88039	0	0.00814058	0.784416
NRG2	-0.55305	0.182384	-3.03235	0.00242659	0.575193	0.104906	-4.04942	5.13441e-05	0.402317	0.822353
HMMR	0.548128	0.132705	4.13043	3.62082e-05	1.73001	0.229581	3.17976	0.00147398	1.3338	2.24392
KRT15	0.167472	0.0664425	2.52056	0.0117169	1.18231	0.0785557	2.3208	0.0202976	1.03795	1.34675
HSPB1P1	0.550452	0.257691	2.1361	0.0326716	1.73404	0.446845	1.64271	0.100443	1.04643	2.87346
SIDT2	-0.572815	0.232655	-2.46208	0.0138133	0.563936	0.131202	-3.3236	0.000888632	0.357432	0.889745
PROZ	-1.83336	0.683389	-2.68274	0.00730216	0.159876	0.109258	-7.68939	1.4766e-14	0.0418872	0.610219
MMP3	0.178785	0.0582916	3.06709	0.00216157	1.19576	0.0697031	2.80855	0.00497659	1.06666	1.34049
RP11-675F6.3	-3.73107	1.44122	-2.58883	0.00963036	0.0239672	0.034542	-28.2564	0	0.00142183	0.404005
TROAP	0.298419	0.106756	2.79534	0.00518454	1.34773	0.143878	2.41682	0.0156569	1.09328	1.66139
DCHS2	-0.224776	0.0979019	-2.29593	0.0216799	0.798695	0.0781938	-2.57443	0.0100404	0.659245	0.967643
MST1R	0.262235	0.0771384	3.39954	0.00067499	1.29983	0.100267	2.99034	0.00278669	1.11745	1.51199
DCT	-2.19049	0.678652	-3.22771	0.00124786	0.111862	0.0759152	-11.6991	0	0.0295809	0.423011
ITGB6	0.359744	0.0791565	4.54472	5.50076e-06	1.43296	0.113428	3.81706	0.00013505	1.22703	1.67345
ECT2	0.545716	0.12643	4.31635	1.58628e-05	1.72584	0.218198	3.32653	0.000879334	1.34705	2.21115
RP11-649E7.5	0.143235	0.0615847	2.32582	0.020028	1.154	0.0710688	2.16693	0.0302402	1.02279	1.30205
[truncated: 570 more rows]

## Sheet: Table S3
Gene	log_rank_P-value
[truncated: 681 more rows]

## Sheet: Table S4
Cluster	Celltype (malignancy)	Celltype (major-lineage)	Celltype (minor-lineage)	Gene	log2FC	Percentage (%)	Adjusted p-value
[truncated: 2,666 more rows]

[truncated: 2 more sheets: Table S5, Table S6]
